# Supplementary material for: Identification of immune correlates of fatal outcomes in critically ill COVID-19 patients
Source: PLoS Pathog. 2021 Sep 16;17(9):e1009804. doi: 10.1371/journal.ppat.1009804 (PMC8445447; doi:10.1371/journal.ppat.1009804)
Supplement: S1 Table — (XLSX) [file ppat.1009804.s012.xlsx]

## Sheet: Sheet1
Fluorophore	marker	clone	Dilution	Time of staining	Company
			(1 in X)
BV421	MR1/5-OP-RU tetramer	--	100	Tetramer staining step	NIH Tetramer Facility
BV480	CD38	HIT2	100	Surface	BD Biosciences
BV605	CD8	SK1	100	Surface	BioLegend
BV650	CD4	OKT4	100	Surface	BioLegend
BV711	Vd2 TCR	B6	100	Surface	BioLegend
BV785	CD3	UCHT1	100	Surface	BioLegend
APC	CD26	BA5b	100	Surface	BioLegend
AF700	HLA-DR	L243	200	Surface	BioLegend
Near-IR	Live/Dead	--	400	Surface	ThermoFisher
FITC	gdTCR	11F2	100	Surface	Miltenyi Biotec
PE	GPR56	REA467	100	Surface	Miltenyi Biotec
PE-dazzle 594	CD69	FN50	100	Surface	BioLegend
PE-Cy7	Va24/Ja18 TCR	6B11	50	Surface	BioLegend
