# Supplementary material for: Identification of immune correlates of fatal outcomes in critically ill COVID-19 patients
Source: PLoS Pathog. 2021 Sep 16;17(9):e1009804. doi: 10.1371/journal.ppat.1009804 (PMC8445447; doi:10.1371/journal.ppat.1009804)
Supplement: S2 Table — (XLSX) [file ppat.1009804.s013.xlsx]

## Sheet: Sheet1
Fluorophore	marker	clone	Dilution	Time of staining	Company
			(1 in X)
BV785	CD107a	H243	100	Beginning of incubation	BioLegend
Zombie UV	Live/dead	--	250	Surface	BioLegend
BUV661	CD3	OKT3	200	Surface	BD Biosciences
BUV737	CD25	2A3	800	Surface	BD Biosciences
BUV805	CD4	SK3	100	Surface	BD Biosciences
AF405	CD8	3B5	100	Surface	ThermoFisher
VioBlue	KLRG1	REA261	100	Surface	Miltenyi Biotec
BV480	CD38	HIT2	100	Surface	BD Biosciences
Superbright 702	CD45RA	HI100	100	Surface	ThermoFisher
AF532	CD20	2H7	50	Surface	ThermoFisher
PE	4-1BB	4B4-1	100	Surface	BioLegend
PE-dazzle 594	PD1	EH12.2H7	100	Surface	Biolegend
PerCP Cy5.5	CCR7	G043H7	50	Surface	Biolegend
PerCP eF710	CD27	O323	100	Surface	ThermoFisher
PE-Cy7	CD57	HNK-1	200	Surface	Biolegend
Spark NiR 685	CD19	HIB19	200	Surface	Biolegend
AF700	HLA-DR	L243	100	Surface	Biolegend
Brilliant Violet Stain Buffer Plus			5	Surface	BD Biosciences
BUV395	TNF	MAb11	100	Intracellular	BD Biosciences
BUV563	CD71	M-A712	100	Intracellular	BD Biosciences
BV421	IgG	G18-145	100	Intracellular	BD Biosciences
BV605	IL2	MQ1-17H12	100	Intracellular	Biolegend
BV650	IFNg	4S.B3	50	Intracellular	Biolegend
BV711	IL-17A	BL168	50	Intracellular	Biolegend
BV750	CD69	FN50	100	Intracellular	Biolegend
FITC	IL-4	MP4-25D2	100	Intracellular	Biolegend
APC	IL-10	JES3-9D7	100	Intracellular	Biolegend
APC eF780	Ki67	SolA15	100	Intracellular	ThermoFisher
