# Supplementary material for: Identification of immune correlates of fatal outcomes in critically ill COVID-19 patients
Source: PLoS Pathog. 2021 Sep 16;17(9):e1009804. doi: 10.1371/journal.ppat.1009804 (PMC8445447; doi:10.1371/journal.ppat.1009804)
Supplement: S3 Table — (XLSX) [file ppat.1009804.s014.xlsx]

## Sheet: Clinical Metadata
Supplementary Table 2 | Clinical Metadata
orig.ident	Virus	Sex	Survival	Cohort	DPO.Group	Age.Group	ECMO				Age.Group Categorization
6.12	Flu	Female	Yes	SGUL	Mid	Young	Yes				Young	<=60
6.7	Flu	Male	Yes	SGUL	Late	Young	No				Old	>60
6.16	Flu	Male	Yes	SGUL	Early	Young	Yes
6.1	Flu	Male	Yes	SGUL	Mid	Young	No				DPO.Group Categorization
6.14	Flu	Male	Yes	SGUL	Mid	Young	Yes				Time of sampling for days post symptoms onset.
6.9	Flu	Male	Yes	SGUL	Mid	Young	Yes				Early	<=7 days
6.18	Flu	Male	Yes	SGUL	Mid	Old	Yes				Mid	8-14 days
5.1	Flu	Female	Yes	SGUL	Mid	Old	No				Late	>14 days
6.1	Flu	Female	Yes	SGUL	Late	Young	No
6.3	Flu	Female	Yes	SGUL	Mid	Young	Yes
6.13	Flu	Female	Yes	SGUL	Mid	Young	Yno
5.5	Flu	Female	Yes	SGUL	Early	Young	No
5.18	COVID	Male	No	SGUL	Mid	Old	NA
5.44	COVID	Male	Yes	SGUL	Late	Young	NA
5.17	COVID	Male	No	SGUL	Mid	Old	NA
5.1	COVID	Male	No	SGUL	Late	Old	NA
5.31	COVID	Male	No	SGUL	Late	Young	NA
5.23	COVID	Male	No	SGUL	Mid	Young	NA
5.11	COVID	Female	No	SGUL	Mid	Old	NA
5.13	COVID	Female	No	SGUL	Early	Young	NA
5.21	COVID	Female	No	SGUL	Mid	Young	NA
5.14	COVID	Female	No	SGUL	Mid	Old	NA
5.43	COVID	Female	Yes	SGUL	Late	Young	NA
5.47	COVID	Female	No	SGUL	Mid	Young	NA
orig.ident	Virus	Sex	Survival	Cohort	DPO.Group	Age.Group	ECMO
covid_555_1	COVID	Male	Yes	Stanford	Mid	Old	NA
covid_555_2	COVID	Male	Yes	Stanford	Mid	Old	NA
covid_556	COVID	Male	Yes	Stanford	Late	Young	NA
covid_557	COVID	Male	Yes	Stanford	Mid	Young	NA
covid_558	COVID	Male	Yes	Stanford	Mid	Young	NA
covid_559	COVID	Male	No	Stanford	Late	Old	NA
HIP002	Control	Male	Yes	Stanford	NA	Young	NA
HIP015	Control	Male	Yes	Stanford	NA	Young	NA
HIP023	Control	Male	Yes	Stanford	NA	Young	NA
HIP043	Control	Male	Yes	Stanford	NA	Young	NA
HIP044	Control	Male	Yes	Stanford	NA	Young	NA
HIP045	Control	Male	Yes	Stanford	NA	Young	NA
