# Supplementary material for: Identification of immune correlates of fatal outcomes in critically ill COVID-19 patients
Source: PLoS Pathog. 2021 Sep 16;17(9):e1009804. doi: 10.1371/journal.ppat.1009804 (PMC8445447; doi:10.1371/journal.ppat.1009804)
Supplement: S4 Table — (XLSX) [file ppat.1009804.s015.xlsx]

## Sheet: Cell Counts
Supplementary Table 3 | Cell Counts
	5-1	5-10	5-11	5-13	5-14	5-17	5-18	5-21	5-23	5-31	5-43	5-44	5-47	5-5	6-1	6-10	6-12	6-14	6-16	6-18	6-3	6-7	6-9	covid_555_1	covid_555_2	covid_556	covid_557	covid_558	covid_559	covid_560	HIP002	HIP015	HIP023	HIP043	HIP044	HIP045
B-cells	187	56	173	269	163	20	39	259	152	167	111	188	47	165	142	21	94	179	25	48	23	86	79	147	333	360	470	124	12	19	186	295	289	540	480	193
CD14	71	1104	364	354	204	264	741	223	455	187	502	526	38	268	509	141	108	347	254	123	346	157	111	534	519	197	1034	144	186	28	692	304	206	154	403	215
CD16	8	112	10	1	2	9	65	56	49	3	70	20	2	68	89	83	36	24	70	5	50	124	0	46	89	2	13	18	1	6	175	74	35	200	388	58
CD4	641	55	256	221	313	62	90	248	59	172	526	478	1341	598	238	199	26	479	332	201	442	127	173	243	597	524	2322	335	804	300	166	191	700	435	754	461
CD8	190	1	166	74	454	46	92	19	10	112	155	102	45	167	89	28	5	24	82	54	111	29	34	690	1049	177	1176	401	288	58	283	660	645	730	317	766
cDC	6	64	11	11	16	20	43	32	95	18	17	6	3	9	7	20	747	6	21	25	39	4	15	24	26	4	25	61	75	10	33	44	23	33	55	35
gd T-cells	2	2	7	2	24	1	14	2	1	1	2	8	0	10	9	5	0	1	2	1	3	0	0	61	102	4	38	0	24	0	8	16	85	11	6	15
HSC	19	0	29	2	7	18	28	40	25	9	18	4	1	17	0	2	88	6	1	17	2	7	27	4	10	0	57	74	3	3	10	5	11	9	21	11
Inflammatory CD14	0	70	203	3	138	416	2	3	117	0	0	4	0	14	2	908	309	22	450	899	15	6	0	1108	1278	16	48	578	366	276	3	2	1	1	10	2
Int Monocytes	0	0	0	0	0	0	0	0	0	0	0	0	0	0	0	0	0	0	0	0	0	0	0	28	27	0	11	6	2	4	15	5	0	6	19	1
MAIT	0	0	12	2	19	0	3	2	1	0	2	5	1	9	1	2	0	1	0	2	3	3	1	5	16	9	21	3	10	1	4	20	26	46	16	38
Myeloid Like B-cells	1	35	10	13	5	12	14	18	28	8	6	18	0	5	12	8	31	26	8	18	4	1	0	4	33	7	25	9	0	0	11	4	3	7	24	4
Neutrophil	3	8	4	26	2	0	6	1	11	0	0	14	0	0	0	0	1	2	1	0	18	0	17	29	142	5	32	31	9	96	15	16	12	2	3	4
NKs	43	2	100	129	144	4	211	18	6	46	221	46	47	15	88	85	1	10	155	24	18	53	13	151	123	234	248	86	353	56	445	206	208	2819	536	122
pDC	0	9	0	5	6	1	8	2	2	0	3	15	0	1	0	1	1	0	4	4	0	0	0	19	16	0	10	24	7	7	25	28	14	29	26	17
Plasma Cells	145	85	57	104	88	663	58	93	312	540	14	76	122	35	205	27	140	142	73	85	42	57	134	171	559	133	388	1669	226	37	5	3	11	49	32	10
Platelets	70	109	90	127	54	39	37	485	208	113	24	28	34	134	106	6	13	80	8	19	2	36	197	56	58	25	163	50	77	5	12	37	13	9	24	4
Proliferating Lymphocytes	19	46	36	18	67	54	148	23	22	103	24	19	17	5	51	60	10	13	98	59	458	11	18	31	19	31	352	71	64	34	6	23	20	54	31	13
RBCs	10	0	7	9	1	2	1	23	5	6	4	2	10	58	22	0	3	185	2	1	0	26	174	5	10	7	112	4	0	953	6	8	4	2	1	29
Total	1415	1758	1535	1370	1707	1631	1600	1547	1558	1485	1699	1559	1708	1578	1570	1596	1613	1547	1586	1585	1576	727	993	3356	5006	1735	6545	3688	2507	1893	2100	1941	2306	5136	3146	1998
