# Supplementary material for: Identification of immune correlates of fatal outcomes in critically ill COVID-19 patients
Source: PLoS Pathog. 2021 Sep 16;17(9):e1009804. doi: 10.1371/journal.ppat.1009804 (PMC8445447; doi:10.1371/journal.ppat.1009804)
Supplement: S5 Table — (XLSX) [file ppat.1009804.s016.xlsx]

## Sheet: Annotation Genelist
Supplementary Table 4 | Genes used to annotate clusters
Genes identified via Seurat's FindAllMarkers function using Wilcox rank-sum, top 30 genes for each cluster were used to identify cell types
p_val	avg_logFC	pct.1	pct.2	p_val_adj	cluster	gene
0	1.5032	0.994	0.471	0	CD14	S100A9
0	1.44652	0.989	0.473	0	CD14	S100A8
0	1.42534	0.988	0.398	0	CD14	LYZ
0	1.42136	0.979	0.305	0	CD14	FCN1
0	1.40326	0.984	0.332	0	CD14	VCAN
0	1.32585	0.675	0.193	0	CD14	IL8
0	1.30741	0.809	0.244	0	CD14	S100A12
0	1.24297	0.904	0.25	0	CD14	CD14
0	1.2079	0.914	0.293	0	CD14	NCF2
0	1.19499	0.994	0.615	0	CD14	CTSS
0	1.14356	0.821	0.259	0	CD14	KLF4
0	1.13422	0.924	0.282	0	CD14	MNDA
0	1.12945	0.595	0.156	0	CD14	CYP1B1
0	1.11188	0.437	0.148	0	CD14	THBS1
0	1.1107	0.817	0.254	0	CD14	PLBD1
0	1.10728	0.732	0.189	0	CD14	PTAFR
0	1.10677	0.916	0.294	0	CD14	AIF1
0	1.08721	0.854	0.354	0	CD14	RGS2
0	1.08079	0.798	0.266	0	CD14	DUSP6
0	1.06649	0.998	0.736	0	CD14	PSAP
0	1.05655	0.932	0.468	0	CD14	TKT
0	1.05631	0.786	0.216	0	CD14	CD36
0	1.05618	0.892	0.422	0	CD14	TSPO
0	1.04845	0.582	0.245	0	CD14	IFI30
0	1.04511	0.798	0.212	0	CD14	MS4A6A
0	1.04483	0.596	0.17	0	CD14	C19orf59
0	1.03885	0.952	0.354	0	CD14	CYBB
0	1.03209	0.916	0.357	0	CD14	GRN
0	1.03206	0.701	0.209	0	CD14	MAFB
0	1.02431	0.953	0.4	0	CD14	TYROBP
0	1.00478	0.799	0.238	0	CD14	FPR1
0	1.00146	0.954	0.491	0	CD14	APLP2
0	1.00108	0.834	0.401	0	CD14	CTSD
0	0.992511	0.919	0.454	0	CD14	CTSB
0	0.991763	0.717	0.189	0	CD14	TNFAIP2
0	0.986861	0.66	0.176	0	CD14	ALDH2
0	0.98292	0.981	0.583	0	CD14	FOS
0	0.969715	0.807	0.297	0	CD14	AMICA1
0	0.96766	0.743	0.285	0	CD14	NAMPT
0	0.952189	0.974	0.742	0	CD14	VIM
0	0.951334	0.769	0.23	0	CD14	CFP
0	0.941254	0.767	0.246	0	CD14	RAB31
0	0.940832	0.679	0.19	0	CD14	CD300E
0	0.940441	0.689	0.185	0	CD14	CPVL
0	0.935501	0.694	0.207	0	CD14	SLC11A1
0	0.934431	0.84	0.272	0	CD14	CST3
0	0.92744	0.816	0.26	0	CD14	MPEG1
0	0.919033	0.78	0.244	0	CD14	EMILIN2
0	0.916243	0.57	0.142	0	CD14	TGFBI
0	0.912645	0.733	0.226	0	CD14	CEBPD
0	0.901067	0.653	0.174	0	CD14	CLEC12A
0	0.897843	0.6	0.171	0	CD14	C5AR1
0	0.888042	0.761	0.328	0	CD14	LTA4H
0	0.87449	0.633	0.154	0	CD14	CSF3R
0	0.874004	0.738	0.226	0	CD14	KCTD12
0	0.868198	0.745	0.293	0	CD14	PGD
0	0.867385	0.986	0.692	0	CD14	FTL
0	0.863871	0.842	0.311	0	CD14	FGL2
0	0.862377	0.667	0.182	0	CD14	CD93
0	0.861443	0.927	0.504	0	CD14	COTL1
0	0.857172	0.89	0.504	0	CD14	DUSP1
0	0.856779	0.901	0.587	0	CD14	ANXA1
0	0.846743	0.666	0.453	0	CD14	FTH1
0	0.846637	0.795	0.395	0	CD14	SOD2
0	0.838503	0.552	0.15	0	CD14	PLAUR
0	0.831035	0.688	0.22	0	CD14	FCGRT
0	0.829293	0.906	0.502	0	CD14	SAT1
0	0.827799	0.954	0.673	0	CD14	SRGN
0	0.82693	0.659	0.18	0	CD14	LRP1
0	0.823844	0.636	0.173	0	CD14	IGSF6
0	0.818755	0.83	0.406	0	CD14	C10orf54
0	0.818095	0.663	0.199	0	CD14	GAS7
0	0.817849	0.348	0.089	0	CD14	IL1B
0	0.814009	0.753	0.312	0	CD14	MEGF9
0	0.809507	0.859	0.405	0	CD14	GPX1
0	0.80676	0.617	0.182	0	CD14	LRRK2
0	0.806095	0.802	0.243	0	CD14	SERPINA1
0	0.805796	0.643	0.261	0	CD14	IRS2
0	0.804705	0.932	0.593	0	CD14	S100A6
0	0.804142	0.403	0.087	0	CD14	TMEM176B
0	0.801193	0.86	0.507	0	CD14	PPP1R15A
0	0.80018	0.782	0.347	0	CD14	IL17RA
0	0.800077	0.826	0.442	0	CD14	FOSB
0	0.799731	0.81	0.45	0	CD14	CD63
0	0.798784	0.49	0.122	0	CD14	ASGR2
0	0.79606	0.703	0.215	0	CD14	HCK
0	0.791585	0.862	0.338	0	CD14	TYMP
0	0.790113	0.74	0.223	0	CD14	LST1
0	0.785319	0.587	0.235	0	CD14	SGK1
0	0.78484	0.787	0.389	0	CD14	LGALS1
0	0.783239	0.738	0.297	0	CD14	CTSZ
0	0.782093	0.82	0.457	0	CD14	S100A10
0	0.780732	0.909	0.546	0	CD14	S100A4
0	0.7794	0.786	0.357	0	CD14	TALDO1
0	0.773066	0.683	0.237	0	CD14	BRI3
0	0.769299	0.723	0.291	0	CD14	PTPRE
0	0.768546	0.791	0.373	0	CD14	GLUL
0	0.768182	0.312	0.074	0	CD14	CXCL2
0	0.763858	0.622	0.185	0	CD14	DMXL2
0	0.763529	0.644	0.232	0	CD14	ACSL1
0	0.76192	0.341	0.095	0	CD14	EREG
0	0.76108	0.545	0.151	0	CD14	SULF2
0	0.760014	0.619	0.186	0	CD14	SLC7A7
0	0.758409	0.616	0.183	0	CD14	IRAK3
0	0.758227	0.611	0.177	0	CD14	PLXDC2
0	0.757329	0.601	0.178	0	CD14	CFD
0	0.756825	0.645	0.313	0	CD14	MYADM
0	0.754414	0.673	0.271	0	CD14	CKAP4
0	0.752152	0.697	0.269	0	CD14	CCDC88A
0	0.752121	0.86	0.477	0	CD14	ANXA2
0	0.750912	0.595	0.209	0	CD14	TRIB1
0	0.750495	0.618	0.177	0	CD14	TLR4
0	0.750391	0.729	0.221	0	CD14	LILRB2
0	0.749993	0.518	0.228	0	CD14	CDKN1A
0	0.744337	0.625	0.197	0	CD14	RXRA
0	0.742712	0.686	0.228	0	CD14	RNF130
0	0.739346	0.643	0.226	0	CD14	CAPG
0	0.737784	0.597	0.184	0	CD14	TIMP2
0	0.733179	0.56	0.161	0	CD14	HK3
0	0.732131	0.612	0.231	0	CD14	AP1S2
0	0.727573	0.488	0.11	0	CD14	CREB5
0	0.720411	0.728	0.502	0	CD14	NEAT1
0	0.719064	0.626	0.198	0	CD14	CD163
0	0.718839	0.661	0.298	0	CD14	RILPL2
0	0.716413	0.543	0.217	0	CD14	CLU
0	0.712388	0.69	0.288	0	CD14	ATP6V1B2
0	0.707865	0.884	0.567	0	CD14	PKM
0	0.70712	0.273	0.1	0	CD14	IER3
0	0.704957	0.793	0.428	0	CD14	SERPINB1
0	0.700172	0.749	0.312	0	CD14	ITGAM
0	0.696676	0.912	0.637	0	CD14	ARPC1B
0	0.694544	0.271	0.062	0	CD14	SERPINB2
0	0.692583	0.754	0.353	0	CD14	RASSF2
0	0.691357	0.666	0.261	0	CD14	CTSH
0	0.690178	0.743	0.335	0	CD14	GLIPR2
0	0.689651	0.703	0.366	0	CD14	METTL9
0	0.685235	0.386	0.142	0	CD14	EGR1
0	0.681749	0.539	0.151	0	CD14	C19orf38
0	0.680694	0.698	0.32	0	CD14	SDCBP
0	0.676798	0.542	0.156	0	CD14	CLEC7A
0	0.676389	0.822	0.559	0	CD14	GAPDH
0	0.674731	0.788	0.44	0	CD14	ZFP36
0	0.673884	0.745	0.446	0	CD14	TUBA1A
0	0.672942	0.315	0.092	0	CD14	RETN
0	0.671784	0.298	0.055	0	CD14	LGALS2
0	0.669966	0.697	0.263	0	CD14	FCER1G
0	0.668059	0.562	0.17	0	CD14	TLR2
0	0.665805	0.513	0.132	0	CD14	NFAM1
0	0.664101	0.643	0.26	0	CD14	NPC2
0	0.663499	0.453	0.139	0	CD14	CD68
0	0.663478	0.787	0.344	0	CD14	FGR
0	0.662423	0.519	0.14	0	CD14	BST1
0	0.659763	0.595	0.197	0	CD14	BLVRB
0	0.657483	0.503	0.15	0	CD14	SLC43A2
0	0.654029	0.539	0.177	0	CD14	GCA
0	0.652219	0.588	0.211	0	CD14	LGALS3
0	0.651464	0.761	0.388	0	CD14	ZEB2
0	0.649866	0.536	0.195	0	CD14	NFIL3
0	0.649572	0.974	0.741	0	CD14	ITGB2
0	0.646759	0.921	0.709	0	CD14	MCL1
0	0.645005	0.965	0.764	0	CD14	OAZ1
0	0.643524	0.525	0.185	0	CD14	BCL2A1
0	0.642343	0.516	0.152	0	CD14	STAB1
0	0.64198	0.484	0.12	0	CD14	CSTA
0	0.636498	0.51	0.167	0	CD14	MSRB1
0	0.636329	0.586	0.222	0	CD14	SCPEP1
0	0.635206	0.552	0.211	0	CD14	MXD1
0	0.631813	0.483	0.143	0	CD14	SULT1A1
0	0.631092	0.897	0.635	0	CD14	NFKBIA
0	0.628205	0.431	0.11	0	CD14	NLRP3
0	0.628085	0.455	0.139	0	CD14	LINC00936
0	0.623065	0.761	0.398	0	CD14	ARRB2
0	0.622578	0.497	0.132	0	CD14	SIRPA
0	0.617301	0.726	0.373	0	CD14	ATP6V0B
0	0.616755	0.579	0.221	0	CD14	S100A11
0	0.614155	0.487	0.178	0	CD14	NCF1
0	0.613807	0.513	0.177	0	CD14	ETS2
0	0.61267	0.486	0.168	0	CD14	RNASE2
0	0.610212	0.743	0.387	0	CD14	ANXA5
0	0.61006	0.819	0.489	0	CD14	H2AFY
0	0.609763	0.701	0.328	0	CD14	ASAH1
0	0.609525	0.874	0.5	0	CD14	TNFRSF1B
0	0.608208	0.526	0.16	0	CD14	FCGR2A
0	0.608041	0.537	0.2	0	CD14	CCR2
0	0.604671	0.374	0.082	0	CD14	CLEC4E
0	0.604339	0.68	0.379	0	CD14	CD55
0	0.60115	0.857	0.575	0	CD14	ALDOA
0	0.600975	0.71	0.403	0	CD14	SLC2A3
0	0.600384	0.559	0.23	0	CD14	OGFRL1
0	0.596069	0.508	0.181	0	CD14	SLC16A3
0	0.595903	0.463	0.139	0	CD14	RAB3D
0	0.595274	0.489	0.138	0	CD14	PYGL
0	0.594578	0.558	0.28	0	CD14	PNPLA8
0	0.593121	0.66	0.321	0	CD14	CDC42EP3
0	0.587031	0.559	0.196	0	CD14	ALOX5
0	0.584543	0.517	0.187	0	CD14	CEBPB
0	0.582795	0.513	0.181	0	CD14	GAA
0	0.582072	0.796	0.386	0	CD14	SYK
0	0.580645	0.542	0.192	0	CD14	TBXAS1
0	0.580454	0.41	0.112	0	CD14	IL13RA1
0	0.577637	0.488	0.161	0	CD14	CCR1
0	0.576805	0.389	0.115	0	CD14	NAMPTL
0	0.575119	0.548	0.227	0	CD14	GM2A
0	0.573693	0.428	0.116	0	CD14	PRAM1
0	0.57316	0.609	0.285	0	CD14	IFNGR1
0	0.570629	0.461	0.138	0	CD14	TMEM170B
0	0.570322	0.616	0.258	0	CD14	LAT2
0	0.56917	0.415	0.106	0	CD14	KIF13A
0	0.568965	0.794	0.379	0	CD14	LYN
0	0.568102	0.439	0.131	0	CD14	SORT1
0	0.567432	0.641	0.329	0	CD14	GLIPR1
0	0.566639	0.647	0.293	0	CD14	THEMIS2
0	0.565784	0.518	0.207	0	CD14	PLIN3
0	0.563978	0.386	0.102	0	CD14	FCGR1A
0	0.563312	0.521	0.169	0	CD14	RASSF4
0	0.563107	0.634	0.29	0	CD14	CTSA
0	0.563009	0.471	0.14	0	CD14	MEFV
0	0.562246	0.289	0.067	0	CD14	HBEGF
0	0.561144	0.745	0.444	0	CD14	ZFAND5
0	0.559015	0.456	0.14	0	CD14	DYSF
0	0.558185	0.784	0.499	0	CD14	SH3BGRL3
0	0.557836	0.371	0.087	0	CD14	TREM1
0	0.555053	0.605	0.3	0	CD14	VMP1
0	0.554766	0.422	0.119	0	CD14	SLC8A1
0	0.554284	0.878	0.63	0	CD14	CD44
0	0.55315	0.576	0.235	0	CD14	PYCARD
0	0.55093	0.648	0.32	0	CD14	FBXL5
0	0.549532	0.675	0.333	0	CD14	PPT1
0	0.549188	0.667	0.309	0	CD14	PLEKHO1
0	0.548794	0.435	0.12	0	CD14	LILRA2
0	0.546318	0.397	0.097	0	CD14	LILRB3
0	0.544389	0.826	0.463	0	CD14	MYO1F
0	0.543956	0.439	0.176	0	CD14	EAF1
0	0.543433	0.558	0.217	0	CD14	DPYD
0	0.542966	0.75	0.423	0	CD14	GSTP1
0	0.542924	0.517	0.17	0	CD14	LMO2
0	0.541945	0.5	0.174	0	CD14	CPPED1
0	0.540719	0.524	0.191	0	CD14	AGTRAP
0	0.537366	0.76	0.465	0	CD14	RTN4
0	0.536153	0.615	0.284	0	CD14	RTN3
0	0.535559	0.46	0.138	0	CD14	PILRA
0	0.535163	0.451	0.159	0	CD14	STX11
0	0.533717	0.643	0.291	0	CD14	GNS
0	0.533287	0.481	0.156	0	CD14	TNFSF13B
0	0.532388	0.493	0.202	0	CD14	AHR
0	0.531203	0.392	0.128	0	CD14	ANPEP
0	0.530524	0.628	0.29	0	CD14	SKAP2
0	0.530384	0.463	0.162	0	CD14	RBM47
0	0.529998	0.562	0.265	0	CD14	BAZ2B
0	0.528884	0.333	0.079	0	CD14	PADI4
0	0.528288	0.386	0.103	0	CD14	KIAA1598
0	0.527956	0.592	0.286	0	CD14	RAB11FIP1
0	0.523469	0.953	0.75	0	CD14	LAPTM5
0	0.522955	0.481	0.166	0	CD14	FES
0	0.522542	0.486	0.181	0	CD14	NCF4
0	0.520986	0.41	0.122	0	CD14	AQP9
0	0.520249	0.502	0.212	0	CD14	CRTAP
0	0.519278	0.6	0.273	0	CD14	MFSD1
0	0.518765	0.874	0.615	0	CD14	GRB2
0	0.517713	0.382	0.111	0	CD14	JDP2
0	0.515907	0.437	0.206	0	CD14	LDLR
0	0.515452	0.454	0.157	0	CD14	NACC2
0	0.514235	0.373	0.092	0	CD14	GLT1D1
0	0.514015	0.401	0.111	0	CD14	FAM198B
0	0.513377	0.532	0.209	0	CD14	PAK1
0	0.512924	0.693	0.389	0	CD14	EHBP1L1
0	0.512847	0.515	0.197	0	CD14	DPYSL2
0	0.512438	0.56	0.232	0	CD14	KIAA0930
0	0.511037	0.412	0.168	0	CD14	OTUD1
0	0.508793	0.442	0.14	0	CD14	PLXNB2
0	0.50712	0.716	0.4	0	CD14	PICALM
0	0.507019	0.41	0.113	0	CD14	LTBR
0	0.506341	0.409	0.113	0	CD14	TLR8
0	0.506149	0.328	0.082	0	CD14	HLX
0	0.504658	0.579	0.254	0	CD14	CTNNA1
0	0.504511	0.432	0.137	0	CD14	IMPA2
0	0.503078	0.395	0.107	0	CD14	SIRPB1
0	0.502839	0.482	0.19	0	CD14	ATP6V0D1
0	0.501392	0.408	0.113	0	CD14	RAB32
0	0.501325	0.411	0.128	0	CD14	GNA15
0	0.50082	0.409	0.122	0	CD14	NFE2
0	0.500037	0.624	0.366	0	CD14	NFKBIZ
0	0.499359	0.506	0.246	0	CD14	KLF10
0	0.498818	0.336	0.092	0	CD14	MARCO
0	0.496933	0.393	0.116	0	CD14	FAM129B
0	0.491146	0.59	0.23	0	CD14	2020-03-01
0	0.49077	0.925	0.673	0	CD14	SAMHD1
0	0.490388	0.473	0.189	0	CD14	LACTB
0	0.487958	0.381	0.11	0	CD14	CD302
0	0.48704	0.39	0.141	0	CD14	VNN2
0	0.486921	0.38	0.124	0	CD14	F5
0	0.486796	0.373	0.147	0	CD14	ATF3
0	0.486637	0.577	0.271	0	CD14	NAGK
0	0.485282	0.432	0.135	0	CD14	SPI1
0	0.484506	0.468	0.166	0	CD14	TNFRSF1A
0	0.484433	0.276	0.055	0	CD14	TMEM176A
0	0.483256	0.619	0.346	0	CD14	GPCPD1
0	0.483149	0.598	0.253	0	CD14	AOAH
0	0.483132	0.899	0.686	0	CD14	ENO1
0	0.483001	0.436	0.203	0	CD14	TRMT6
0	0.482452	0.578	0.261	0	CD14	CORO1C
0	0.480996	0.36	0.101	0	CD14	CD1D
0	0.479077	0.337	0.106	0	CD14	ADM
0	0.477708	0.813	0.411	0	CD14	HLA-DRA
0	0.477591	0.885	0.645	0	CD14	GNAI2
0	0.477544	0.491	0.2	0	CD14	SNX10
0	0.476775	0.568	0.283	0	CD14	LAPTM4A
0	0.47471	0.896	0.691	0	CD14	RHOA
0	0.474333	0.404	0.122	0	CD14	LILRA5
0	0.4726	0.532	0.225	0	CD14	TIMP1
0	0.471802	0.354	0.09	0	CD14	MGST1
0	0.470738	0.745	0.391	0	CD14	LYST
0	0.469517	0.744	0.452	0	CD14	ZNF106
0	0.469394	0.516	0.22	0	CD14	ZYX
0	0.468717	0.449	0.173	0	CD14	QSOX1
0	0.468416	0.418	0.147	0	CD14	CYFIP1
0	0.468408	0.942	0.747	0	CD14	KLF6
0	0.467737	0.653	0.354	0	CD14	PTTG1IP
0	0.467572	0.417	0.129	0	CD14	F13A1
0	0.466836	0.349	0.088	0	CD14	KCNE3
0	0.466675	0.257	0.06	0	CD14	PTGS2
0	0.46607	0.372	0.115	0	CD14	SMCO4
0	0.465704	0.493	0.215	0	CD14	CHP1
0	0.464999	0.591	0.285	0	CD14	FKBP15
0	0.463236	0.567	0.272	0	CD14	BACH1
0	0.462968	0.589	0.293	0	CD14	WARS
0	0.461542	0.337	0.085	0	CD14	OSCAR
0	0.460292	0.368	0.099	0	CD14	CRISPLD2
0	0.460032	0.51	0.218	0	CD14	PRKCD
0	0.459638	0.878	0.685	0	CD14	LRRFIP1
0	0.457759	0.328	0.078	0	CD14	NLRP12
0	0.457056	0.709	0.411	0	CD14	RAC1
0	0.456849	0.533	0.242	0	CD14	MAPKAPK3
0	0.456195	0.413	0.146	0	CD14	MBOAT7
0	0.45507	0.582	0.385	0	CD14	ATP2B1
0	0.454747	0.406	0.155	0	CD14	CD86
0	0.454007	0.365	0.107	0	CD14	ALDH3B1
0	0.45337	0.581	0.285	0	CD14	GSTO1
0	0.452452	0.378	0.126	0	CD14	SECTM1
0	0.450561	0.317	0.08	0	CD14	QPCT
0	0.450513	0.323	0.097	0	CD14	RP11-1143G9.4
0	0.450016	0.354	0.129	0	CD14	PFKFB3
0	0.44905	0.38	0.12	0	CD14	BCL6
0	0.448234	0.584	0.268	0	CD14	APOBR
0	0.447777	0.552	0.246	0	CD14	C1orf162
0	0.446281	0.942	0.825	0	CD14	MYL6
0	0.446026	0.52	0.245	0	CD14	NUMB
0	0.445821	0.363	0.144	0	CD14	RRP12
0	0.44581	0.508	0.24	0	CD14	HLA-DRB5
0	0.445513	0.564	0.293	0	CD14	RBPJ
0	0.444244	0.435	0.17	0	CD14	DSE
0	0.442234	0.591	0.295	0	CD14	CECR1
0	0.442163	0.258	0.052	0	CD14	HCAR2
0	0.441937	0.472	0.201	0	CD14	SCO2
0	0.441914	0.387	0.13	0	CD14	LY86
0	0.441896	0.344	0.092	0	CD14	CSF2RA
0	0.44056	0.491	0.223	0	CD14	HEXB
0	0.440067	0.384	0.149	0	CD14	MID1IP1
0	0.439668	0.591	0.3	0	CD14	RHOG
0	0.439557	0.309	0.085	0	CD14	2020-03-01
0	0.438867	0.517	0.245	0	CD14	STX10
0	0.437329	0.36	0.111	0	CD14	FBP1
0	0.437306	0.703	0.473	0	CD14	JMJD1C
0	0.436747	0.436	0.164	0	CD14	SPECC1
0	0.436619	0.606	0.3	0	CD14	CASP1
0	0.436489	0.388	0.133	0	CD14	RNF144B
0	0.435684	0.52	0.247	0	CD14	AGFG1
0	0.435503	0.435	0.177	0	CD14	NAGA
0	0.435018	0.48	0.217	0	CD14	ATP6V1A
0	0.434603	0.329	0.114	0	CD14	NAIP
0	0.43348	0.467	0.243	0	CD14	SAMSN1
0	0.432361	0.549	0.264	0	CD14	PLXNC1
0	0.432276	0.46	0.2	0	CD14	SQRDL
0	0.430603	0.651	0.347	0	CD14	IL6R
0	0.430356	0.462	0.185	0	CD14	IFNGR2
0	0.429096	0.704	0.447	0	CD14	VAMP8
0	0.428579	0.431	0.163	0	CD14	CREG1
0	0.427301	0.576	0.276	0	CD14	TET2
0	0.4269	0.295	0.075	0	CD14	CD300LF
0	0.426802	0.527	0.255	0	CD14	CUX1
0	0.426763	0.979	0.845	0	CD14	ACTB
0	0.426741	0.507	0.235	0	CD14	NUP214
0	0.424533	0.335	0.094	0	CD14	CD33
0	0.424485	0.541	0.245	0	CD14	ARHGAP26
0	0.424371	0.352	0.157	0	CD14	PPIF
0	0.423712	0.434	0.233	0	CD14	TIPARP
0	0.423687	0.451	0.188	0	CD14	NUDT16
0	0.423677	0.371	0.115	0	CD14	SLC15A3
0	0.423319	0.573	0.315	0	CD14	MAPK14
0	0.422654	0.561	0.301	0	CD14	CSGALNACT2
0	0.42196	0.863	0.637	0	CD14	ARPC5
0	0.421857	0.337	0.1	0	CD14	ADAP2
0	0.421681	0.571	0.316	0	CD14	CHMP2A
0	0.420708	0.47	0.203	0	CD14	ZDHHC7
0	0.420596	0.513	0.279	0	CD14	SOCS3
0	0.420556	0.364	0.145	0	CD14	MAFG
0	0.420535	0.366	0.113	0	CD14	LRRC25
0	0.417957	0.604	0.337	0	CD14	GLRX
0	0.416853	0.783	0.526	0	CD14	CAST
0	0.41605	0.617	0.329	0	CD14	SPTLC2
0	0.415941	0.511	0.252	0	CD14	IL10RB
0	0.415451	0.836	0.514	0	CD14	EFHD2
0	0.414183	0.594	0.319	0	CD14	CNPY3
0	0.414179	0.404	0.199	0	CD14	C20orf24
0	0.413792	0.506	0.259	0	CD14	TMEM167A
0	0.411879	0.347	0.117	0	CD14	CSF2RB
0	0.41081	0.321	0.097	0	CD14	MLTK
0	0.409324	0.426	0.141	0	CD14	CSF1R
0	0.408663	0.602	0.341	0	CD14	TCIRG1
0	0.408275	0.518	0.259	0	CD14	SHKBP1
0	0.407784	0.586	0.317	0	CD14	GNB2
0	0.407567	0.502	0.228	0	CD14	RALB
0	0.407175	0.35	0.118	0	CD14	DUSP3
0	0.400821	0.847	0.649	0	CD14	SLC25A6
0	0.400535	0.283	0.072	0	CD14	CLEC4A
0	0.400498	0.625	0.349	0	CD14	QKI
0	0.400191	0.36	0.135	0	CD14	FRAT1
0	0.399481	0.582	0.32	0	CD14	UPP1
0	0.399383	0.52	0.235	0	CD14	BLVRA
0	0.398961	0.504	0.234	0	CD14	AGO4
0	0.398131	0.512	0.247	0	CD14	SNX27
0	0.397965	0.512	0.225	0	CD14	GNAQ
0	0.396967	0.514	0.258	0	CD14	FKBP1A
0	0.396483	0.292	0.084	0	CD14	CLMN
0	0.396223	0.578	0.322	0	CD14	ATG3
0	0.394873	0.259	0.058	0	CD14	CTB-61M7.2
0	0.394572	0.31	0.09	0	CD14	WDFY3
0	0.393725	0.485	0.245	0	CD14	EVI2A
0	0.393082	0.804	0.464	0	CD14	HLA-DRB1
0	0.39274	0.417	0.17	0	CD14	PHC2
0	0.392533	0.531	0.264	0	CD14	MAP3K3
0	0.392408	0.388	0.147	0	CD14	TOM1
0	0.391015	0.375	0.169	0	CD14	MARCKS
0	0.389745	0.677	0.407	0	CD14	FERMT3
0	0.388913	0.54	0.286	0	CD14	LAMTOR1
0	0.388757	0.409	0.184	0	CD14	PER1
0	0.38829	0.591	0.343	0	CD14	CLIC1
0	0.387131	0.323	0.097	0	CD14	LILRA6
0	0.387084	0.666	0.429	0	CD14	IER2
0	0.387005	0.781	0.565	0	CD14	PGK1
0	0.386603	0.471	0.224	0	CD14	TPD52L2
0	0.386294	0.577	0.317	0	CD14	RNH1
0	0.38554	0.317	0.097	0	CD14	SLC31A2
0	0.38464	0.798	0.575	0	CD14	JUN
0	0.38274	0.446	0.187	0	CD14	ADRBK2
0	0.38241	0.35	0.119	0	CD14	TFEC
0	0.382406	0.416	0.189	0	CD14	TTC7A
0	0.380056	0.538	0.256	0	CD14	YBX3
0	0.379469	0.367	0.162	0	CD14	BASP1
0	0.379463	0.268	0.06	0	CD14	FCAR
0	0.378583	0.494	0.244	0	CD14	AP2S1
0	0.378573	0.447	0.233	0	CD14	PIM3
0	0.378386	0.782	0.562	0	CD14	CALM2
0	0.376994	0.81	0.568	0	CD14	CYBA
0	0.376808	0.398	0.198	0	CD14	PLP2
0	0.375373	0.351	0.128	0	CD14	GRINA
0	0.375291	0.505	0.252	0	CD14	SPG21
0	0.37374	0.321	0.107	0	CD14	KYNU
0	0.373723	0.387	0.168	0	CD14	DIAPH2
0	0.373541	0.383	0.164	0	CD14	HSPA1A
0	0.372223	0.96	0.826	0	CD14	ACTG1
0	0.372143	0.483	0.237	0	CD14	ARAP1
0	0.370743	0.575	0.325	0	CD14	MGAT1
0	0.369481	0.553	0.277	0	CD14	TPP1
0	0.365643	0.41	0.174	0	CD14	PPM1F
0	0.365313	0.262	0.079	0	CD14	ZFHX3
0	0.36516	0.603	0.363	0	CD14	SEC11A
0	0.364888	0.329	0.111	0	CD14	PLXND1
0	0.364589	0.646	0.388	0	CD14	SH3BGRL
0	0.364284	0.53	0.279	0	CD14	CAPZA2
0	0.364006	0.754	0.486	0	CD14	NCOA4
0	0.363354	0.561	0.318	0	CD14	UQCRC1
0	0.362981	0.424	0.165	0	CD14	ITGAX
0	0.362892	0.437	0.205	0	CD14	COLGALT1
0	0.36186	0.319	0.124	0	CD14	SAP30
0	0.361325	0.296	0.104	0	CD14	EPB41L3
0	0.360659	0.299	0.124	0	CD14	HIP1
0	0.360537	0.336	0.123	0	CD14	LILRB4
0	0.360227	0.278	0.09	0	CD14	EVI5
0	0.360184	0.674	0.419	0	CD14	ARPC3
0	0.359722	0.283	0.085	0	CD14	IL1RN
0	0.359551	0.564	0.284	0	CD14	BNIP3L
0	0.359402	0.353	0.135	0	CD14	FRAT2
0	0.359344	0.481	0.28	0	CD14	CHMP1B
0	0.359317	0.314	0.105	0	CD14	FGD4
0	0.358206	0.479	0.249	0	CD14	TLE3
0	0.357733	0.389	0.202	0	CD14	PNP
0	0.357523	0.315	0.105	0	CD14	CR1
0	0.356414	0.558	0.317	0	CD14	USP3
0	0.35598	0.33	0.124	0	CD14	RNASE6
0	0.355709	0.251	0.065	0	CD14	SMARCD3
0	0.355476	0.539	0.297	0	CD14	CLTA
0	0.355447	0.284	0.084	0	CD14	FLVCR2
0	0.355245	0.366	0.157	0	CD14	TET3
0	0.355148	0.454	0.214	0	CD14	ITPK1
0	0.354943	0.501	0.275	0	CD14	YWHAG
0	0.35487	0.724	0.505	0	CD14	HADHA
0	0.354445	0.666	0.397	0	CD14	VASP
0	0.354165	0.42	0.191	0	CD14	IMPDH1
0	0.354061	0.312	0.096	0	CD14	LILRA1
0	0.353806	0.315	0.119	0	CD14	RIPK2
0	0.35361	0.488	0.242	0	CD14	PSTPIP1
0	0.353243	0.383	0.165	0	CD14	NAPRT1
0	0.35181	0.508	0.275	0	CD14	CCNY
0	0.349551	0.294	0.092	0	CD14	MCTP1
0	0.349371	0.296	0.108	0	CD14	MYOF
0	0.348879	0.323	0.11	0	CD14	MS4A7
0	0.348682	0.553	0.295	0	CD14	TNFSF10
0	0.348331	0.556	0.314	0	CD14	LAMTOR4
0	0.348126	0.797	0.585	0	CD14	GMFG
0	0.346615	0.402	0.186	0	CD14	COMT
0	0.346331	0.537	0.312	0	CD14	HIF1A
0	0.345792	0.667	0.427	0	CD14	OS9
0	0.345759	0.339	0.14	0	CD14	NINJ1
0	0.345371	0.702	0.464	0	CD14	USP15
0	0.344439	0.449	0.225	0	CD14	EMP3
0	0.344366	0.566	0.317	0	CD14	NOTCH2
0	0.343632	0.776	0.544	0	CD14	DAZAP2
0	0.343385	0.343	0.128	0	CD14	DOCK5
0	0.342279	0.439	0.211	0	CD14	HSBP1
0	0.341717	0.285	0.085	0	CD14	FPR2
0	0.341159	0.441	0.192	0	CD14	METRNL
0	0.34103	0.665	0.414	0	CD14	CMTM6
0	0.340808	0.387	0.163	0	CD14	FAM105A
0	0.340588	0.354	0.141	0	CD14	C9orf72
0	0.339604	0.636	0.397	0	CD14	CHMP4B
0	0.338878	0.284	0.086	0	CD14	CEBPA
0	0.338827	0.635	0.403	0	CD14	BNIP2
0	0.337018	0.296	0.11	0	CD14	C3AR1
0	0.336583	0.579	0.355	0	CD14	ATP6AP2
0	0.33542	0.443	0.227	0	CD14	PDXK
0	0.334741	0.313	0.109	0	CD14	MS4A4A
0	0.334724	0.737	0.511	0	CD14	CAPNS1
0	0.334208	0.408	0.189	0	CD14	RCOR1
0	0.333522	0.292	0.105	0	CD14	HK2
0	0.329126	0.387	0.174	0	CD14	SLCO3A1
0	0.329061	0.415	0.202	0	CD14	ATG16L2
0	0.328597	0.577	0.345	0	CD14	NBPF10
0	0.328144	0.475	0.274	0	CD14	CSRNP1
0	0.327778	0.505	0.263	0	CD14	AGTPBP1
0	0.327448	0.28	0.083	0	CD14	SIGLEC9
0	0.326952	0.471	0.224	0	CD14	LGALS9
0	0.32683	0.3	0.102	0	CD14	EMR2
0	0.326823	0.338	0.135	0	CD14	CD151
0	0.326799	0.414	0.201	0	CD14	MIDN
0	0.326193	0.343	0.157	0	CD14	CAMKK2
0	0.325567	0.563	0.327	0	CD14	POU2F2
0	0.325556	0.285	0.09	0	CD14	ADAM9
0	0.325554	0.289	0.099	0	CD14	CES1
0	0.325292	0.978	0.876	0	CD14	LCP1
0	0.325255	0.469	0.228	0	CD14	FOSL2
0	0.325056	0.634	0.395	0	CD14	PLEC
0	0.324984	0.326	0.149	0	CD14	RASGEF1B
0	0.324964	0.436	0.221	0	CD14	JAK2
0	0.32476	0.263	0.085	0	CD14	GAB2
0	0.324331	0.429	0.223	0	CD14	MAP3K8
0	0.324249	0.569	0.339	0	CD14	RAB27A
0	0.324185	0.59	0.354	0	CD14	LRPAP1
0	0.323629	0.467	0.229	0	CD14	ASAP1
0	0.323296	0.369	0.169	0	CD14	MICU1
0	0.323221	0.686	0.502	0	CD14	FKBP5
0	0.322563	0.573	0.356	0	CD14	RNF149
0	0.322248	0.382	0.173	0	CD14	TRIM8
0	0.321841	0.329	0.126	0	CD14	IDH1
0	0.32148	0.304	0.116	0	CD14	ACER3
0	0.321253	0.352	0.149	0	CD14	ZSWIM6
0	0.320884	0.453	0.235	0	CD14	CARD16
0	0.320615	0.598	0.366	0	CD14	YWHAE
0	0.320283	0.266	0.089	0	CD14	LILRA3
0	0.320257	0.433	0.24	0	CD14	VAMP5
0	0.320076	0.745	0.534	0	CD14	CCDC69
0	0.319615	0.31	0.114	0	CD14	DOK3
0	0.319453	0.268	0.111	0	CD14	MAFF
0	0.319112	0.506	0.292	0	CD14	C14orf2
0	0.318767	0.829	0.542	0	CD14	PLEK
0	0.318765	0.57	0.335	0	CD14	UBE2R2
0	0.318403	0.503	0.261	0	CD14	MYD88
0	0.318264	0.259	0.075	0	CD14	HRH2
0	0.318179	0.308	0.129	0	CD14	MIR22HG
0	0.3175	0.522	0.306	0	CD14	RAB1A
0	0.317464	0.881	0.634	0	CD14	FYB
0	0.31731	0.486	0.291	0	CD14	LAP3
0	0.317094	0.277	0.092	0	CD14	LPCAT2
0	0.316471	0.66	0.436	0	CD14	ATP6V0E1
0	0.315483	0.275	0.097	0	CD14	RHOU
0	0.314907	0.534	0.298	0	CD14	RGS19
0	0.314435	0.333	0.136	0	CD14	RELT
0	0.312893	0.471	0.274	0	CD14	FAM101B
0	0.312407	0.422	0.22	0	CD14	LMNB1
0	0.312387	0.319	0.144	0	CD14	AMPD2
0	0.311046	0.342	0.148	0	CD14	MANBA
0	0.310749	0.563	0.326	0	CD14	FAM129A
0	0.310372	0.449	0.245	0	CD14	ATP6V1F
0	0.310338	0.568	0.338	0	CD14	EVI2B
0	0.309888	0.603	0.378	0	CD14	ARPC4
0	0.308956	0.303	0.117	0	CD14	KIAA0513
0	0.308618	0.425	0.236	0	CD14	PRELID1
0	0.3073	0.432	0.214	0	CD14	HSD17B11
0	0.306278	0.867	0.688	0	CD14	PFDN5
0	0.306025	0.328	0.134	0	CD14	APOBEC3A
0	0.305739	0.864	0.708	0	CD14	SERF2
0	0.302362	0.353	0.175	0	CD14	NABP1
0	0.302289	0.334	0.132	0	CD14	SCIMP
0	0.300755	0.363	0.17	0	CD14	HLA-DMB
0	0.298129	0.296	0.109	0	CD14	HMOX1
0	0.297443	0.27	0.102	0	CD14	LINC00963
0	0.297436	0.58	0.34	0	CD14	SNX2
0	0.297263	0.594	0.349	0	CD14	PLCB2
0	0.297085	0.322	0.142	0	CD14	TMEM205
0	0.296544	0.374	0.183	0	CD14	SAT2
0	0.296331	0.884	0.734	0	CD14	COX4I1
0	0.29571	0.451	0.256	0	CD14	TRIM25
0	0.295325	0.371	0.173	0	CD14	SLC6A6
0	0.295307	0.306	0.127	0	CD14	TRPS1
0	0.294822	0.985	0.932	0	CD14	TMSB10
0	0.29444	0.402	0.209	0	CD14	BID
0	0.29408	0.374	0.193	0	CD14	HLA-DMA
0	0.293977	0.411	0.198	0	CD14	LEPROT
0	0.293182	0.408	0.218	0	CD14	LIPA
0	0.292186	0.665	0.471	0	CD14	HMGB2
0	0.291664	0.399	0.233	0	CD14	PLIN2
0	0.291252	0.302	0.121	0	CD14	LTB4R
0	0.291171	0.395	0.195	0	CD14	VAMP3
0	0.291018	0.392	0.224	0	CD14	ACAA1
0	0.289898	0.401	0.192	0	CD14	APP
0	0.289413	0.344	0.166	0	CD14	MAN2B1
0	0.289262	0.277	0.1	0	CD14	MICAL2
0	0.289128	0.285	0.118	0	CD14	CHST15
0	0.288178	0.285	0.115	0	CD14	IRF5
0	0.288053	0.264	0.093	0	CD14	DRAM1
0	0.286787	0.302	0.129	0	CD14	ASPH
0	0.2867	0.592	0.387	0	CD14	PRDX5
0	0.286686	0.397	0.211	0	CD14	NADK
0	0.286616	0.594	0.387	0	CD14	WSB1
0	0.286383	0.373	0.184	0	CD14	ZMIZ1
0	0.286366	0.295	0.129	0	CD14	SLC2A6
0	0.285797	0.346	0.163	0	CD14	DNTTIP1
0	0.285746	0.785	0.533	0	CD14	JUNB
0	0.284951	0.872	0.727	0	CD14	CFL1
0	0.284427	0.437	0.235	0	CD14	DNAJC5
0	0.283675	0.487	0.269	0	CD14	METTL7A
0	0.283459	0.349	0.162	0	CD14	H2AFJ
0	0.283101	0.53	0.315	0	CD14	AGPAT3
0	0.282068	0.405	0.211	0	CD14	OSBPL11
0	0.281268	0.374	0.176	0	CD14	FGD2
0	0.280821	0.88	0.743	0	CD14	ACTR2
0	0.280306	0.365	0.179	0	CD14	BLOC1S1
0	0.280208	0.394	0.163	0	CD14	MPP1
0	0.279432	0.769	0.572	0	CD14	ARF1
0	0.278592	0.393	0.198	0	CD14	APAF1
0	0.278474	0.44	0.22	0	CD14	SERPINB6
0	0.277558	0.44	0.218	0	CD14	PLSCR1
0	0.277463	0.586	0.357	0	CD14	HK1
0	0.277187	0.56	0.345	0	CD14	DICER1
0	0.276565	0.277	0.102	0	CD14	AGPAT2
0	0.275768	0.437	0.242	0	CD14	HADHB
0	0.275696	0.456	0.259	0	CD14	ATP6AP1
0	0.275528	0.347	0.17	0	CD14	RNPEP
0	0.275526	0.366	0.195	0	CD14	PGAM1
0	0.275394	0.447	0.248	0	CD14	GNG5
0	0.275112	0.4	0.196	0	CD14	DENND5A
0	0.274971	0.296	0.125	0	CD14	PRKACA
0	0.273712	0.362	0.189	0	CD14	SRA1
0	0.273583	0.314	0.138	0	CD14	KDM1B
0	0.273542	0.354	0.173	0	CD14	INPPL1
0	0.273138	0.421	0.236	0	CD14	CARS2
0	0.270805	0.251	0.108	0	CD14	H1F0
0	0.270106	0.312	0.145	0	CD14	OAZ2
0	0.27006	0.706	0.489	0	CD14	GDI2
0	0.269944	0.303	0.128	0	CD14	AP5B1
0	0.269307	0.34	0.159	0	CD14	FAM49A
0	0.269257	0.385	0.195	0	CD14	GLTP
0	0.269174	0.504	0.304	0	CD14	VAPA
0	0.268995	0.404	0.207	0	CD14	PSEN1
0	0.268797	0.274	0.109	0	CD14	UBE2D1
0	0.268755	0.428	0.202	0	CD14	CD83
0	0.268518	0.347	0.167	0	CD14	AKIRIN2
0	0.26829	0.528	0.339	0	CD14	ETF1
0	0.267956	0.388	0.198	0	CD14	TMEM127
0	0.267661	0.258	0.105	0	CD14	FADS1
0	0.266802	0.442	0.244	0	CD14	FAR1
0	0.266218	0.398	0.204	0	CD14	B4GALT5
0	0.265725	0.446	0.25	0	CD14	CAT
0	0.265081	0.605	0.391	0	CD14	RAB7A
0	0.264595	0.296	0.115	0	CD14	RNF24
0	0.264302	0.906	0.783	0	CD14	TPM3
0	0.2643	0.328	0.158	0	CD14	PRCP
0	0.263625	0.374	0.187	0	CD14	SERTAD2
0	0.263597	0.688	0.47	0	CD14	TPI1
0	0.262792	0.259	0.103	0	CD14	GABARAP
0	0.262536	0.269	0.118	0	CD14	SLC31A1
0	0.26234	0.4	0.229	0	CD14	NFE2L2
0	0.262177	0.527	0.277	0	CD14	NR4A2
0	0.261619	0.352	0.174	0	CD14	RAB5C
0	0.261605	0.431	0.218	0	CD14	LILRB1
0	0.261422	0.268	0.104	0	CD14	FAM200B
0	0.261328	0.591	0.326	0	CD14	PIK3AP1
0	0.261124	0.371	0.191	0	CD14	SLC12A9
0	0.260899	0.717	0.509	0	CD14	SERP1
0	0.259886	0.476	0.27	0	CD14	HEBP2
0	0.259493	0.278	0.123	0	CD14	DOK1
0	0.259142	0.353	0.176	0	CD14	DENND3
0	0.258998	0.435	0.236	0	CD14	PHF21A
0	0.258721	0.315	0.129	0	CD14	GSN
0	0.257723	0.253	0.1	0	CD14	RNF135
0	0.257519	0.362	0.184	0	CD14	MAP3K11
0	0.257285	0.491	0.292	0	CD14	LAMP2
0	0.256327	0.479	0.288	0	CD14	PLEKHB2
0	0.255998	0.356	0.179	0	CD14	RHOQ
0	0.255904	0.508	0.306	0	CD14	HOOK3
0	0.255707	0.512	0.322	0	CD14	COX8A
0	0.255108	0.338	0.162	0	CD14	TWF2
0	0.25479	0.369	0.183	0	CD14	RIT1
0	0.254768	0.975	0.906	0	CD14	MT-CO3
0	0.254422	0.427	0.252	0	CD14	ACSL4
0	0.253273	0.415	0.226	0	CD14	RNF13
0	0.253265	0.321	0.148	0	CD14	ITPRIP
0	0.253028	0.547	0.337	0	CD14	SYNGR2
0	0.25302	0.398	0.222	0	CD14	CSTB
0	0.252322	0.405	0.216	0	CD14	CPD
0	0.252221	0.267	0.101	0	CD14	ADAP1
0	-0.340404	0.94	0.918	0	CD14	RPL19
0	-0.352094	0.889	0.902	0	CD14	DDX5
0	-0.361712	0.978	0.971	0	CD14	HLA-E
0	-0.379259	0.935	0.912	0	CD14	RPL31
0	-0.382754	0.955	0.931	0	CD14	RPS14
0	-0.383583	0.909	0.883	0	CD14	RPS2
0	-0.38422	0.903	0.889	0	CD14	RPL27A
0	-0.391602	0.757	0.782	0	CD14	SF3B1
0	-0.39717	0.92	0.893	0	CD14	RPL18
0	-0.43697	0.771	0.775	0	CD14	RPL32
0	-0.452673	0.858	0.843	0	CD14	RPS20
0	-0.456347	0.857	0.832	0	CD14	RPS21
0	-0.467568	0.666	0.723	0	CD14	DDX17
0	-0.476873	0.91	0.881	0	CD14	RPS4X
0	-0.491393	0.6	0.678	0	CD14	RPL10
0	-0.500353	0.921	0.906	0	CD14	RPL13
0	-0.511385	0.81	0.846	0	CD14	CALM1
0	-0.51142	0.702	0.754	0	CD14	RPL10A
0	-0.529907	0.11	0.271	0	CD14	BIN1
0	-0.531346	0.212	0.36	0	CD14	PEBP1
0	-0.539158	0.68	0.74	0	CD14	RPS27A
0	-0.539626	0.666	0.735	0	CD14	MBNL1
0	-0.54182	0.721	0.761	0	CD14	NCL
0	-0.543518	0.558	0.62	0	CD14	TMEM123
0	-0.561107	0.916	0.914	0	CD14	RPS3
0	-0.561738	0.092	0.264	0	CD14	PPM1K
0	-0.562282	0.599	0.676	0	CD14	HSPA8
0	-0.565739	0.551	0.633	0	CD14	EIF4A2
0	-0.567303	0.576	0.671	0	CD14	ADD3
0	-0.568872	0.082	0.262	0	CD14	ORMDL3
0	-0.573408	0.75	0.812	0	CD14	RPL14
0	-0.582706	0.96	0.948	0	CD14	RPS6
0	-0.585143	0.13	0.289	0	CD14	MDN1
0	-0.586223	0.634	0.72	0	CD14	RPS29
0	-0.589999	0.106	0.268	0	CD14	DYRK2
0	-0.594412	0.909	0.908	0	CD14	RPL13A
0	-0.599353	0.085	0.267	0	CD14	SP140
0	-0.602246	0.184	0.347	0	CD14	GBP5
0	-0.603821	0.36	0.508	0	CD14	ZC3HAV1
0	-0.607793	0.719	0.743	0	CD14	GLTSCR2
0	-0.611846	0.695	0.753	0	CD14	HSP90AB1
0	-0.612403	0.217	0.384	0	CD14	SYNRG
0	-0.613767	0.149	0.309	0	CD14	STK17A
0	-0.615802	0.496	0.616	0	CD14	IKZF1
0	-0.617036	0.669	0.739	0	CD14	JAK1
0	-0.618679	0.254	0.411	0	CD14	SAMD9
0	-0.622581	0.242	0.404	0	CD14	ITGB7
0	-0.627463	0.12	0.3	0	CD14	CDC25B
0	-0.627586	0.143	0.308	0	CD14	ZBTB38
0	-0.631171	0.908	0.903	0	CD14	RPS12
0	-0.634178	0.389	0.542	0	CD14	CDC42SE2
0	-0.634481	0.339	0.505	0	CD14	NPM1
0	-0.639101	0.196	0.381	0	CD14	TBC1D10C
0	-0.640007	0.083	0.28	0	CD14	PRKACB
0	-0.640922	0.878	0.886	0	CD14	RPS18
0	-0.640995	0.87	0.893	0	CD14	RPS19
0	-0.648479	0.21	0.381	0	CD14	CNOT6L
0	-0.652198	0.205	0.385	0	CD14	PSIP1
0	-0.65386	0.089	0.269	0	CD14	TRANK1
0	-0.65859	0.067	0.277	0	CD14	CLEC2D
0	-0.661184	0.118	0.326	0	CD14	ST6GAL1
0	-0.662362	0.109	0.258	0	CD14	SEL1L3
0	-0.664252	0.209	0.389	0	CD14	BTN3A1
0	-0.666685	0.336	0.493	0	CD14	KMT2A
0	-0.668132	0.164	0.319	0	CD14	GPRIN3
0	-0.671651	0.447	0.592	0	CD14	RPSA
0	-0.678716	0.767	0.841	0	CD14	RNF213
0	-0.681773	0.26	0.436	0	CD14	PARP1
0	-0.683214	0.225	0.401	0	CD14	SPTAN1
0	-0.688466	0.341	0.521	0	CD14	DDX6
0	-0.694513	0.224	0.4	0	CD14	PBXIP1
0	-0.702904	0.125	0.287	0	CD14	ATHL1
0	-0.704699	0.398	0.537	0	CD14	RBL2
0	-0.704977	0.215	0.407	0	CD14	TMC8
0	-0.709384	0.295	0.482	0	CD14	2020-09-06
0	-0.709785	0.138	0.288	0	CD14	SLAMF7
0	-0.713646	0.327	0.506	0	CD14	RPS27
0	-0.720396	0.076	0.276	0	CD14	PIM2
0	-0.724921	0.909	0.925	0	CD14	RPL3
0	-0.729154	0.447	0.56	0	CD14	CYLD
0	-0.734528	0.425	0.59	0	CD14	KIAA1551
0	-0.736351	0.081	0.326	0	CD14	IL2RG
0	-0.741181	0.298	0.487	0	CD14	BTN3A2
0	-0.749274	0.03	0.274	0	CD14	ATP8B2
0	-0.757003	0.36	0.51	0	CD14	SPN
0	-0.762502	0.085	0.32	0	CD14	OPTN
0	-0.763224	0.299	0.488	0	CD14	EPB41
0	-0.767811	0.771	0.831	0	CD14	RPS5
0	-0.779114	0.872	0.91	0	CD14	TXNIP
0	-0.790521	0.027	0.26	0	CD14	ITK
0	-0.796365	0.081	0.331	0	CD14	PCED1B-AS1
0	-0.79916	0.023	0.272	0	CD14	RASGRP1
0	-0.799508	0.467	0.574	0	CD14	LDHB
0	-0.805284	0.042	0.274	0	CD14	GOLGA8B
0	-0.805575	0.031	0.26	0	CD14	CD6
0	-0.807631	0.024	0.261	0	CD14	CD96
0	-0.814226	0.087	0.312	0	CD14	PRKCH
0	-0.814416	0.17	0.345	0	CD14	BIRC3
0	-0.83031	0.04	0.291	0	CD14	ZAP70
0	-0.832866	0.05	0.285	0	CD14	GOLGA8A
0	-0.834192	0.024	0.283	0	CD14	LBH
0	-0.846843	0.029	0.282	0	CD14	CD3E
0	-0.856491	0.187	0.435	0	CD14	MLLT6
0	-0.859306	0.628	0.753	0	CD14	MACF1
0	-0.891313	0.026	0.274	0	CD14	CD3G
0	-0.895535	0.091	0.377	0	CD14	ISG20
0	-0.908336	0.037	0.298	0	CD14	CD2
0	-0.916913	0.029	0.289	0	CD14	RORA
0	-0.93458	0.279	0.522	0	CD14	ATM
0	-0.937494	0.137	0.371	0	CD14	PIK3IP1
0	-0.977887	0.171	0.417	0	CD14	RUNX3
0	-0.979249	0.041	0.309	0	CD14	ABLIM1
0	-0.992541	0.032	0.303	0	CD14	IL32
0	-0.995265	0.042	0.269	0	CD14	FAM46C
0	-0.999894	0.217	0.488	0	CD14	SPTBN1
0	-1.01886	0.029	0.348	0	CD14	RP11-94L15.2
0	-1.04044	0.058	0.367	0	CD14	LCK
0	-1.0487	0.026	0.317	0	CD14	BCL11B
0	-1.05147	0.172	0.503	0	CD14	CYFIP2
0	-1.07392	0.085	0.334	0	CD14	BCL2
0	-1.13371	0.118	0.482	0	CD14	EVL
0	-1.15184	0.044	0.343	0	CD14	TRAC
0	-1.17519	0.088	0.362	0	CD14	CD69
0	-1.17559	0.057	0.364	0	CD14	CD3D
0	-1.18208	0.039	0.303	0	CD14	TCF7
0	-1.1884	0.036	0.265	0	CD14	GZMA
0	-1.20526	0.084	0.422	0	CD14	CCND2
0	-1.21605	0.253	0.512	0	CD14	SYNE1
0	-1.32231	0.073	0.407	0	CD14	CD247
0	-1.33668	0.2	0.531	0	CD14	SLFN5
0	-1.38916	0.204	0.577	0	CD14	ARL4C
0	-1.3978	0.058	0.432	0	CD14	SPOCK2
0	-1.4293	0.075	0.538	0	CD14	PTPRCAP
0	-1.51507	0.098	0.557	0	CD14	SLC38A1
0	-1.57297	0.144	0.434	0	CD14	LTB
0	-1.58913	0.12	0.354	0	CD14	CCL5
0	-1.63314	0.062	0.32	0	CD14	PRF1
0	-1.68577	0.106	0.546	0	CD14	TRBC2
0	-1.86502	0.08	0.297	0	CD14	GNLY
0	-1.98409	0.101	0.408	0	CD14	IL7R
0	-2.09837	0.095	0.603	0	CD14	SYNE2
0	-2.12104	0.143	0.669	0	CD14	ETS1
2.03e-307	0.25215	0.371	0.21	6.1e-303	CD14	ADAM17
2.45e-305	0.292538	0.538	0.358	7.35e-301	CD14	PPP1R15B
1.57e-304	-0.373303	0.905	0.872	4.73e-300	CD14	RPS8
6.02e-304	-0.528058	0.297	0.439	1.81e-299	CD14	DDX24
4.57e-302	-0.623737	0.349	0.467	1.37e-297	CD14	GAS5
7.76e-301	-0.583144	0.331	0.463	2.33e-296	CD14	LNPEP
1.75e-298	-0.578682	0.344	0.476	5.26e-294	CD14	CCDC88C
2.26e-293	-0.264813	0.967	0.941	6.81e-289	CD14	RPS11
5.87e-290	-0.539477	0.178	0.327	1.76e-285	CD14	MPRIP
1.17e-288	-0.454617	0.821	0.793	3.51e-284	CD14	RPS23
2.79e-288	-0.340794	0.911	0.885	8.4e-284	CD14	RPS16
3.83e-285	-0.593884	0.456	0.544	1.15e-280	CD14	PIP4K2A
3.26e-284	-0.36036	0.806	0.785	9.81e-280	CD14	RPL35
6.41e-284	-0.471642	0.661	0.683	1.93e-279	CD14	TMEM66
1.72e-282	0.264166	0.787	0.6	5.17e-278	CD14	SELL
3.9e-279	-0.65638	0.146	0.285	1.17e-274	CD14	LMAN1
3.9e-279	-0.555494	0.184	0.327	1.17e-274	CD14	KIF2A
4.81e-277	-0.830595	0.388	0.484	1.45e-272	CD14	CXCR4
3.95e-276	-0.506364	0.222	0.367	1.19e-271	CD14	SLC44A2
3.72e-275	-0.502958	0.263	0.399	1.12e-270	CD14	TMC6
1.55e-272	-0.665986	0.199	0.333	4.65e-268	CD14	SATB1
4.64e-271	-0.543958	0.272	0.413	1.4e-266	CD14	SAMD9L
8.43e-269	-0.381087	0.901	0.866	2.53e-264	CD14	RPL34
8.61e-267	-0.55757	0.311	0.439	2.59e-262	CD14	OGT
9.86e-267	-0.562675	0.422	0.519	2.96e-262	CD14	PPP2R5C
7.86e-265	-0.347012	0.891	0.902	2.36e-260	CD14	EEF1A1
2.82e-264	-0.511855	0.116	0.253	8.49e-260	CD14	OFD1
3.39e-262	-0.286228	0.951	0.93	1.02e-257	CD14	PTPRC
1.44e-261	-0.690698	0.12	0.255	4.34e-257	CD14	IFI44L
3.87e-260	-0.682611	0.215	0.342	1.16e-255	CD14	DGKA
7.33e-257	-0.498847	0.412	0.525	2.2e-252	CD14	ITGA4
5.82e-256	-0.312386	0.922	0.89	1.75e-251	CD14	RPL4
7.29e-256	-0.551193	0.347	0.465	2.19e-251	CD14	TTC3
4.46e-251	-0.440658	0.123	0.257	1.34e-246	CD14	ATP2A3
6.13e-249	-0.512166	0.271	0.395	1.84e-244	CD14	NOP56
7.04e-248	-0.490655	0.624	0.644	2.12e-243	CD14	RPS25
9.76e-248	-0.487578	0.568	0.618	2.93e-243	CD14	CYTH1
4.14e-244	-0.629221	0.193	0.322	1.24e-239	CD14	ARID5B
1.5e-242	-0.589593	0.367	0.467	4.52e-238	CD14	FOXP1
1.14e-240	-0.492884	0.259	0.381	3.43e-236	CD14	NOP58
3.89e-240	-0.470321	0.433	0.519	1.17e-235	CD14	RPL23A
6.31e-239	-0.548044	0.29	0.405	1.9e-234	CD14	PDCD4
3.25e-238	-0.509319	0.184	0.316	9.77e-234	CD14	RARRES3
3.46e-237	-0.375442	0.743	0.741	1.04e-232	CD14	RPL12
3.32e-236	-0.582452	0.425	0.514	9.98e-232	CD14	PIK3R1
1.16e-232	-0.543315	0.239	0.362	3.48e-228	CD14	RASA3
6.16e-230	-0.332616	0.999	0.988	1.85e-225	CD14	MALAT1
1.6e-229	-0.387042	0.863	0.82	4.81e-225	CD14	RPL5
5.1e-229	-0.396048	0.838	0.8	1.53e-224	CD14	RPLP0
1.62e-228	-0.498752	0.152	0.281	4.87e-224	CD14	BTN3A3
2.53e-225	-0.490363	0.128	0.251	7.61e-221	CD14	NCK2
2.96e-225	-0.44731	0.213	0.341	8.9e-221	CD14	GLS
1.3e-224	-0.41553	0.127	0.252	3.91e-220	CD14	SNHG1
4.97e-224	-0.372447	0.679	0.692	1.49e-219	CD14	HNRNPDL
1.1e-223	-0.474455	0.436	0.514	3.3e-219	CD14	SOD1
9.79e-223	-0.479546	0.46	0.534	2.94e-218	CD14	EEF1B2
3.86e-221	-0.529981	0.25	0.372	1.16e-216	CD14	GCC2
1.11e-220	-0.466722	0.151	0.277	3.35e-216	CD14	APOBEC3G
2.8e-220	-0.395416	0.615	0.646	8.42e-216	CD14	MATR3
1.2e-218	-0.491865	0.157	0.282	3.6e-214	CD14	ZCCHC11
3.17e-218	0.256484	0.572	0.415	9.52e-214	CD14	DNTTIP2
7.14e-218	-0.330122	0.796	0.781	2.15e-213	CD14	RPL7A
1.29e-216	-0.452505	0.235	0.357	3.89e-212	CD14	CD81
3.63e-216	-0.512929	0.211	0.333	1.09e-211	CD14	P2RY8
1.27e-214	-0.482836	0.295	0.403	3.83e-210	CD14	NAP1L4
2.76e-214	-0.491241	0.192	0.314	8.3e-210	CD14	ELK4
1.16e-213	-0.40231	0.639	0.671	3.47e-209	CD14	STK4
1.37e-212	-0.330019	0.857	0.827	4.11e-208	CD14	HSP90AA1
3.35e-211	-0.569183	0.168	0.287	1.01e-206	CD14	DIP2A
1.29e-209	-0.436128	0.289	0.399	3.87e-205	CD14	HMGN1
8.61e-209	-0.437707	0.173	0.294	2.59e-204	CD14	ESYT1
8.16e-207	-0.334714	0.72	0.73	2.45e-202	CD14	RPS15
4.9e-206	-0.627214	0.212	0.329	1.47e-201	CD14	RPSAP58
5.24e-206	-0.472427	0.617	0.628	1.58e-201	CD14	NAP1L1
2.58e-205	-0.480864	0.29	0.401	7.76e-201	CD14	UBTF
2.11e-203	-0.388091	0.159	0.28	6.35e-199	CD14	C12orf57
4.89e-203	-0.403644	0.131	0.251	1.47e-198	CD14	STIM2
8.34e-203	-0.353462	0.911	0.875	2.51e-198	CD14	RPLP2
2.58e-202	-0.401392	0.647	0.671	7.75e-198	CD14	SMCHD1
1.92e-199	-0.464937	0.19	0.307	5.77e-195	CD14	RAB7L1
1.1e-197	-0.46529	0.347	0.451	3.3e-193	CD14	HUWE1
1.38e-196	-0.980744	0.182	0.294	4.14e-192	CD14	FCGR3A
2.87e-196	-0.500396	0.293	0.397	8.62e-192	CD14	ACAP1
1.27e-195	-0.465888	0.436	0.516	3.83e-191	CD14	TRAF3IP3
1.01e-191	-0.463276	0.365	0.456	3.05e-187	CD14	UHMK1
1.1e-189	-0.371902	0.629	0.666	3.32e-185	CD14	ADAR
1.42e-189	-0.557688	0.454	0.517	4.27e-185	CD14	CHD3
6.4e-188	-0.319089	0.863	0.825	1.92e-183	CD14	RPL35A
8.25e-188	-0.441069	0.489	0.545	2.48e-183	CD14	CIRBP
4.59e-184	-0.3417	0.684	0.693	1.38e-179	CD14	RPL24
1.02e-179	-0.470584	0.439	0.504	3.06e-175	CD14	NUCKS1
1.53e-179	-0.438926	0.235	0.343	4.59e-175	CD14	NOLC1
7.69e-177	-0.449462	0.248	0.356	2.31e-172	CD14	EML4
1.25e-176	-0.395526	0.183	0.293	3.77e-172	CD14	NUP210
3.73e-176	-0.466444	0.272	0.375	1.12e-171	CD14	PRKDC
7.89e-174	-0.474475	0.382	0.469	2.37e-169	CD14	SMG1
1.03e-173	-0.313428	0.945	0.906	3.11e-169	CD14	RPL11
1.56e-173	-0.444672	0.286	0.384	4.68e-169	CD14	G3BP1
3.76e-172	-0.619631	0.301	0.394	1.13e-167	CD14	MX1
4.81e-172	-0.37442	0.653	0.663	1.45e-167	CD14	EIF4B
1.9e-171	-0.415538	0.502	0.553	5.72e-167	CD14	RAD21
2.58e-170	-0.290302	0.779	0.769	7.77e-166	CD14	PTMA
6.76e-168	-0.421051	0.378	0.463	2.03e-163	CD14	SNRNP200
1.49e-166	-0.472007	0.221	0.323	4.47e-162	CD14	SLC9A3R1
1.61e-166	-0.416853	0.239	0.338	4.85e-162	CD14	BUB3
2.32e-166	-0.36173	0.619	0.645	6.98e-162	CD14	HNRNPH1
1.51e-163	-0.523078	0.203	0.306	4.54e-159	CD14	ISG15
3.3e-161	-0.442448	0.269	0.368	9.92e-157	CD14	DOCK10
3.49e-161	-0.463603	0.21	0.311	1.05e-156	CD14	ARHGEF3
1.54e-160	-0.366765	0.77	0.761	4.62e-156	CD14	BTG1
1.34e-159	-0.450451	0.162	0.261	4.02e-155	CD14	CCSER2
9.7e-159	-0.47967	0.271	0.367	2.92e-154	CD14	OAS2
1.27e-156	-0.45051	0.603	0.628	3.81e-152	CD14	UTRN
3e-155	-0.351993	0.569	0.597	9.01e-151	CD14	SET
1.06e-152	-0.432221	0.161	0.263	3.18e-148	CD14	CASP8AP2
4.73e-151	-0.456198	0.384	0.461	1.42e-146	CD14	KAT6A
7.06e-150	-0.487577	0.218	0.314	2.12e-145	CD14	ARAP2
1.1e-149	-0.385636	0.54	0.578	3.3e-145	CD14	WIPF1
5.25e-147	-0.930176	0.736	0.728	1.58e-142	CD14	HSP90B1
9.69e-146	-0.767588	0.209	0.306	2.91e-141	CD14	AC009501.4
2.78e-143	-0.375626	0.176	0.28	8.35e-139	CD14	GBP4
1.45e-141	-0.400565	0.169	0.264	4.35e-137	CD14	PHC3
1.31e-140	-0.274023	0.763	0.748	3.95e-136	CD14	SON
2.71e-140	-0.453906	0.291	0.375	8.15e-136	CD14	ARHGAP25
1.9e-139	-0.322676	0.657	0.662	5.72e-135	CD14	HNRNPA1
1.38e-138	-0.434686	0.245	0.331	4.16e-134	CD14	ODC1
3.35e-138	-0.45232	0.178	0.268	1.01e-133	CD14	MGAT4A
2.56e-137	-0.403025	0.517	0.556	7.69e-133	CD14	TPR
6.69e-137	-0.395994	0.52	0.566	2.01e-132	CD14	ATRX
1.22e-135	-0.393119	0.421	0.482	3.66e-131	CD14	WDR82
9.13e-135	-0.491014	0.34	0.41	2.75e-130	CD14	GIMAP7
3.55e-134	-0.388901	0.512	0.557	1.07e-129	CD14	MGEA5
1.21e-133	-0.37097	0.191	0.284	3.64e-129	CD14	PCGF5
1.44e-132	-0.412059	0.27	0.348	4.33e-128	CD14	AES
1.24e-130	-0.382753	0.396	0.459	3.73e-126	CD14	CD47
2.37e-128	-0.422445	0.282	0.363	7.11e-124	CD14	DNMT1
9.77e-128	-2.36626	0.194	0.277	2.94e-123	CD14	IGHM
3.37e-127	-0.394223	0.187	0.278	1.01e-122	CD14	PCSK7
1.04e-125	-0.455501	0.433	0.487	3.13e-121	CD14	TNRC6B
8.71e-125	-0.369184	0.24	0.325	2.62e-120	CD14	RBBP7
1.48e-124	-0.388015	0.197	0.285	4.44e-120	CD14	RASA2
3.17e-124	-0.410301	0.404	0.496	9.53e-120	CD14	RPS3A
9.44e-124	-0.424453	0.366	0.457	2.84e-119	CD14	RPL18A
2.69e-123	-0.440013	0.193	0.277	8.1e-119	CD14	GNG2
1.74e-122	-0.305862	0.179	0.271	5.22e-118	CD14	LY6E
1.98e-122	-0.375744	0.5	0.541	5.94e-118	CD14	RASSF5
5.45e-122	-0.420323	0.307	0.377	1.64e-117	CD14	RASGRP2
3.51e-121	-0.409758	0.449	0.5	1.06e-116	CD14	AKNA
2.44e-119	-0.379285	0.581	0.6	7.33e-115	CD14	ANKRD12
9e-119	-0.472358	0.222	0.306	2.71e-114	CD14	HIST1H1D
2.02e-118	-0.366447	0.308	0.389	6.07e-114	CD14	PRPF8
1.51e-117	-0.408245	0.428	0.49	4.54e-113	CD14	NKTR
4.74e-117	-0.394109	0.462	0.503	1.42e-112	CD14	MAN1A2
6.95e-117	-0.432938	0.211	0.292	2.09e-112	CD14	LPIN2
4.7e-116	-0.337284	0.166	0.251	1.41e-111	CD14	ARHGAP15
1.74e-114	-0.346828	0.538	0.567	5.23e-110	CD14	HP1BP3
7.48e-114	-0.368742	0.357	0.421	2.25e-109	CD14	G3BP2
2.69e-113	-0.355438	0.211	0.297	8.07e-109	CD14	HSPH1
5.3e-113	-0.3386	0.55	0.571	1.59e-108	CD14	ARGLU1
8.82e-113	-0.337319	0.169	0.253	2.65e-108	CD14	RP11-220I1.1
1.51e-112	-0.399975	0.606	0.592	4.53e-108	CD14	RPS15A
3.72e-112	-0.342099	0.198	0.281	1.12e-107	CD14	URI1
9.52e-112	-0.374203	0.365	0.43	2.86e-107	CD14	TAF7
1.71e-111	-0.402803	0.322	0.386	5.13e-107	CD14	HSPD1
4.43e-111	-0.404352	0.19	0.271	1.33e-106	CD14	ZBTB44
2.57e-110	-0.316361	0.6	0.614	7.74e-106	CD14	ILF3
7.36e-110	-0.368544	0.505	0.561	2.21e-105	CD14	RPL9
1.31e-106	-0.3168	0.626	0.635	3.92e-102	CD14	HLA-F
9.52e-106	-0.47581	0.714	0.698	2.86e-101	CD14	HSPA5
3.11e-105	-0.363782	0.382	0.44	9.34e-101	CD14	SMARCC1
6.31e-104	-0.376597	0.467	0.513	1.9e-99	CD14	APOL6
1.57e-103	-0.379501	0.419	0.467	4.71e-99	CD14	BAZ1B
5.04e-101	-0.339815	0.524	0.545	1.52e-96	CD14	SMARCA5
9e-101	-0.335194	0.372	0.428	2.71e-96	CD14	GTF3A
1.99e-100	-0.342445	0.226	0.303	5.98e-96	CD14	CLSTN1
1.08e-98	-0.392644	0.212	0.288	3.24e-94	CD14	PCNT
6.35e-98	-0.501886	0.426	0.455	1.91e-93	CD14	ITGB1
1.34e-97	-0.312786	0.62	0.623	4.02e-93	CD14	SRSF11
1.47e-96	-0.479421	0.292	0.357	4.43e-92	CD14	GNPTAB
8.85e-96	-0.327051	0.547	0.563	2.66e-91	CD14	2020-09-07
1.78e-95	-0.388525	0.299	0.361	5.35e-91	CD14	ESYT2
3.37e-95	-0.273422	0.7	0.676	1.01e-90	CD14	RPL37
6.88e-95	-0.345059	0.181	0.255	2.07e-90	CD14	ZNF276
6.98e-95	-0.344416	0.419	0.463	2.1e-90	CD14	RPL36
3.37e-94	-0.334374	0.202	0.276	1.01e-89	CD14	ASXL1
5.4e-94	-0.473174	0.489	0.504	1.62e-89	CD14	XAF1
5.6e-94	-0.394231	0.241	0.309	1.68e-89	CD14	NOSIP
1.95e-93	-0.37608	0.423	0.468	5.87e-89	CD14	BIRC6
2.49e-93	-0.445266	0.193	0.266	7.48e-89	CD14	OAS3
2.05e-92	-0.545716	0.225	0.291	6.18e-88	CD14	HIST1H4C
2.58e-92	-0.330352	0.294	0.356	7.76e-88	CD14	CUTA
2.69e-91	-0.362014	0.2	0.271	8.08e-87	CD14	RNF19A
3.77e-91	-0.315166	0.498	0.535	1.13e-86	CD14	RPS7
9.6e-91	-0.358851	0.295	0.359	2.89e-86	CD14	RBM26
4.4e-90	-0.36323	0.351	0.406	1.32e-85	CD14	TNFAIP8
7.44e-89	-0.34841	0.262	0.33	2.24e-84	CD14	THUMPD1
2.27e-88	-0.316914	0.261	0.333	6.83e-84	CD14	RPL41
2.3e-88	-0.316904	0.587	0.601	6.92e-84	CD14	KMT2E
1.56e-87	-0.365988	0.25	0.313	4.68e-83	CD14	NASP
2.31e-86	-0.338627	0.206	0.277	6.95e-82	CD14	SIN3A
7.78e-86	-0.353314	0.337	0.39	2.34e-81	CD14	GSPT1
4.14e-85	-0.442981	0.199	0.264	1.24e-80	CD14	SMC4
4.47e-85	-0.355368	0.249	0.315	1.34e-80	CD14	CASP8
5.94e-85	-0.258733	0.738	0.724	1.79e-80	CD14	SRRM2
1.43e-84	-0.354877	0.338	0.397	4.3e-80	CD14	MPHOSPH8
2.01e-84	-0.373632	0.333	0.389	6.03e-80	CD14	BBX
3.83e-84	-0.380459	0.191	0.258	1.15e-79	CD14	RP11-427H3.3
1.93e-82	-0.313936	0.463	0.499	5.81e-78	CD14	HNRNPA3
2.19e-82	-0.316134	0.181	0.251	6.58e-78	CD14	WWP1
1.63e-81	-0.319417	0.571	0.59	4.91e-77	CD14	CHD2
3.57e-81	-0.302053	0.181	0.251	1.07e-76	CD14	PTCD3
3.7e-81	-0.344877	0.225	0.292	1.11e-76	CD14	SOS1
2.85e-80	-0.310223	0.209	0.273	8.57e-76	CD14	DUT
5.58e-80	-0.336473	0.229	0.297	1.68e-75	CD14	ATF7IP
9.13e-80	-0.339297	0.292	0.35	2.75e-75	CD14	CTCF
1.74e-78	-0.352576	0.407	0.446	5.22e-74	CD14	SEMA4D
1.95e-78	-0.295733	0.208	0.278	5.86e-74	CD14	RABGAP1L
1.99e-78	-0.339702	0.202	0.267	5.98e-74	CD14	MDFIC
5.18e-78	-0.332573	0.37	0.416	1.56e-73	CD14	C9orf78
1.14e-77	-0.337988	0.358	0.402	3.43e-73	CD14	EPRS
2.25e-77	-0.363089	0.268	0.327	6.76e-73	CD14	INPP4A
2.68e-77	-0.288175	0.777	0.726	8.04e-73	CD14	RPL38
2.1e-76	-0.346493	0.336	0.384	6.32e-72	CD14	SUPT16H
4.03e-76	-0.312308	0.425	0.458	1.21e-71	CD14	HMGB1
5.75e-76	-0.393191	0.357	0.404	1.73e-71	CD14	HERC1
9.1e-76	-0.322749	0.352	0.397	2.74e-71	CD14	FBL
2e-74	-0.303573	0.646	0.639	6.03e-70	CD14	EZR
2.24e-74	-0.288253	0.535	0.543	6.74e-70	CD14	HNRNPR
1.09e-73	-0.287312	0.633	0.63	3.26e-69	CD14	MYCBP2
6.59e-73	-0.346301	0.414	0.452	1.98e-68	CD14	SMARCA2
1.17e-72	-0.265343	0.674	0.656	3.53e-68	CD14	BRD2
1.89e-72	-0.303143	0.226	0.285	5.67e-68	CD14	GNL3
3.11e-72	-0.327987	0.201	0.264	9.36e-68	CD14	KRI1
7.41e-72	-0.323839	0.476	0.503	2.23e-67	CD14	PCM1
9.19e-72	-0.303516	0.201	0.264	2.76e-67	CD14	TCOF1
9.77e-72	-0.28036	0.59	0.574	2.94e-67	CD14	SNRPD2
1.9e-71	-0.309902	0.354	0.402	5.71e-67	CD14	PUM2
4.26e-71	-0.326637	0.267	0.325	1.28e-66	CD14	TTC37
6.56e-71	-0.311992	0.242	0.303	1.97e-66	CD14	ARRDC3
4.97e-70	-0.299628	0.401	0.438	1.5e-65	CD14	RBMX
1.22e-69	-0.393216	0.512	0.54	3.68e-65	CD14	MT-ND6
4.79e-68	-0.366156	0.357	0.401	1.44e-63	CD14	KIAA1109
4.82e-68	-0.289898	0.297	0.348	1.45e-63	CD14	CCT2
5.55e-68	-0.380621	0.267	0.317	1.67e-63	CD14	DNAJB1
5.79e-68	-0.312016	0.565	0.572	1.74e-63	CD14	BPTF
9.57e-68	-0.305089	0.215	0.276	2.88e-63	CD14	NOL8
1.87e-67	-0.359536	0.295	0.345	5.63e-63	CD14	EIF2AK2
9.87e-67	-0.311986	0.239	0.293	2.97e-62	CD14	ARPC5L
1.27e-66	-0.335031	0.209	0.265	3.82e-62	CD14	SIGIRR
1.26e-65	-0.317554	0.36	0.404	3.8e-61	CD14	CCNL2
1.49e-64	-0.280717	0.225	0.282	4.47e-60	CD14	CAND1
3.39e-64	-0.343112	0.386	0.426	1.02e-59	CD14	PRRC2B
5.15e-64	-0.347842	0.344	0.384	1.55e-59	CD14	TRIM22
1.85e-63	-0.273799	0.218	0.275	5.55e-59	CD14	CEBPZ
2.02e-63	-0.30386	0.278	0.328	6.08e-59	CD14	SUZ12
2.61e-62	-0.350284	0.568	0.551	7.85e-58	CD14	UBB
2.63e-62	-0.281293	0.236	0.297	7.9e-58	CD14	ERAP2
3.37e-62	-0.53239	0.293	0.333	1.01e-57	CD14	PDIA4
4.31e-62	-0.304923	0.21	0.265	1.3e-57	CD14	RICTOR
9.09e-62	-0.301066	0.374	0.409	2.73e-57	CD14	XPO1
1.5e-61	-0.303854	0.304	0.349	4.51e-57	CD14	YWHAQ
2.11e-61	-0.418668	0.312	0.352	6.35e-57	CD14	ATP2B4
2.25e-61	-0.335465	0.265	0.321	6.75e-57	CD14	RPS17L
3.27e-61	-0.293362	0.416	0.441	9.84e-57	CD14	CCT3
2.01e-60	-0.296637	0.483	0.5	6.04e-56	CD14	TOP2B
4.02e-60	-0.302718	0.211	0.267	1.21e-55	CD14	TCF20
7.31e-59	-0.342175	0.244	0.293	2.2e-54	CD14	MYLIP
1.2e-58	-0.277075	0.242	0.296	3.6e-54	CD14	LRPPRC
1.17e-56	-0.273377	0.519	0.534	3.53e-52	CD14	ANXA6
3.53e-55	-0.297336	0.566	0.566	1.06e-50	CD14	RPS28
2.08e-54	-0.28502	0.429	0.452	6.25e-50	CD14	GPBP1
9.94e-54	-0.275768	0.22	0.269	2.99e-49	CD14	LEPROTL1
6.92e-53	-0.31485	0.441	0.46	2.08e-48	CD14	USP34
1.5e-52	-0.289401	0.506	0.512	4.52e-48	CD14	FAM107B
3.9e-52	-0.340747	0.398	0.422	1.17e-47	CD14	PRMT2
7.23e-52	-0.289503	0.305	0.345	2.17e-47	CD14	TPP2
2.17e-51	-0.301014	0.218	0.268	6.53e-47	CD14	DIDO1
1.21e-50	-0.312623	0.347	0.381	3.63e-46	CD14	OIP5-AS1
1.63e-50	-0.302591	0.304	0.344	4.9e-46	CD14	NUMA1
2.03e-50	-0.325865	0.539	0.537	6.11e-46	CD14	CALR
2.12e-50	-0.328732	0.298	0.335	6.36e-46	CD14	SNRK
2.17e-50	-0.296389	0.329	0.365	6.52e-46	CD14	TAF1D
3.88e-50	-0.26132	0.367	0.398	1.17e-45	CD14	TAP1
4.14e-50	-0.268723	0.239	0.285	1.24e-45	CD14	RECQL
7.91e-50	-0.259433	0.258	0.306	2.38e-45	CD14	DEF6
1.09e-49	-0.251727	0.23	0.277	3.28e-45	CD14	DARS
1.88e-49	-0.289374	0.384	0.412	5.65e-45	CD14	PDS5A
2.06e-49	-0.305007	0.456	0.471	6.19e-45	CD14	WHSC1L1
4.03e-49	-0.361405	0.609	0.58	1.21e-44	CD14	ITGAL
5.38e-49	-0.267928	0.28	0.323	1.62e-44	CD14	ISCU
1.03e-48	-0.259857	0.519	0.521	3.09e-44	CD14	SRSF7
3.36e-48	-0.276502	0.33	0.365	1.01e-43	CD14	ANAPC16
3.93e-48	-0.293367	0.356	0.385	1.18e-43	CD14	ANP32E
5.04e-48	-0.298342	0.337	0.371	1.52e-43	CD14	SMC3
7.76e-48	-0.388655	0.256	0.293	2.33e-43	CD14	TUBB
3.62e-47	-0.30631	0.335	0.368	1.09e-42	CD14	ARHGEF1
5.56e-47	-0.283211	0.315	0.354	1.67e-42	CD14	LARS
1.56e-46	-0.314399	0.329	0.363	4.69e-42	CD14	PRDM2
1.92e-46	-0.285918	0.268	0.308	5.77e-42	CD14	USP1
1.97e-46	-0.294208	0.36	0.394	5.91e-42	CD14	FNBP4
1.29e-45	-0.370829	0.461	0.457	3.86e-41	CD14	FYN
1.96e-45	-0.268528	0.276	0.318	5.9e-41	CD14	ZRANB2
2.74e-45	-0.297656	0.356	0.382	8.24e-41	CD14	EIF5B
2.97e-45	-0.323321	0.302	0.338	8.94e-41	CD14	FRYL
4e-45	-0.300741	0.426	0.438	1.2e-40	CD14	TRAM1
1.37e-44	-0.257739	0.393	0.41	4.11e-40	CD14	HINT1
2.1e-44	-0.28019	0.304	0.341	6.3e-40	CD14	2020-03-06
5.54e-44	-0.252198	0.374	0.4	1.67e-39	CD14	PPIA
9.49e-44	-0.308632	0.278	0.312	2.85e-39	CD14	IL16
1.7e-43	-0.29247	0.29	0.326	5.1e-39	CD14	PLCL2
6.85e-43	-0.266609	0.304	0.34	2.06e-38	CD14	MAT2B
5.56e-42	-0.278055	0.392	0.403	1.67e-37	CD14	RAN
6.39e-42	-0.261219	0.228	0.272	1.92e-37	CD14	AP2B1
9.71e-42	-0.308074	0.258	0.297	2.92e-37	CD14	GPATCH8
1.05e-41	-0.25247	0.296	0.332	3.16e-37	CD14	CMPK1
2.04e-41	-0.262052	0.213	0.254	6.14e-37	CD14	HERPUD2
6.21e-41	-0.269363	0.482	0.497	1.87e-36	CD14	LITAF
6.98e-40	-0.283213	0.493	0.497	2.1e-35	CD14	LUC7L3
8.78e-39	-0.266162	0.344	0.368	2.64e-34	CD14	SSRP1
1.7e-38	-0.331428	0.267	0.298	5.12e-34	CD14	NUCB2
1.08e-37	-0.272337	0.265	0.302	3.24e-33	CD14	KIAA0947
1.65e-37	-0.279134	0.286	0.32	4.96e-33	CD14	TLK1
5.73e-37	-0.250568	0.212	0.251	1.72e-32	CD14	PFKP
1.72e-36	-0.250701	0.401	0.413	5.18e-32	CD14	ANAPC5
3.15e-36	-0.355559	0.429	0.428	9.46e-32	CD14	MBP
3.38e-36	-0.269216	0.349	0.377	1.02e-31	CD14	XRN1
7.14e-36	-0.252438	0.275	0.309	2.15e-31	CD14	HTATSF1
7.86e-36	-0.273051	0.272	0.305	2.36e-31	CD14	ATXN7L3B
8.91e-36	-0.260406	0.404	0.42	2.68e-31	CD14	SNRNP70
2.61e-35	-0.301835	0.415	0.415	7.86e-31	CD14	SUB1
2.64e-35	-0.272489	0.264	0.297	7.93e-31	CD14	ZBTB1
3.06e-35	-0.260146	0.569	0.552	9.21e-31	CD14	ERBB2IP
5.43e-35	-0.307238	0.35	0.369	1.63e-30	CD14	TAB2
9.04e-35	-0.270508	0.397	0.415	2.72e-30	CD14	RBM6
1.34e-34	-0.338124	0.364	0.382	4.04e-30	CD14	HEXIM1
3.41e-34	-0.266707	0.393	0.41	1.03e-29	CD14	RANBP2
6.28e-34	-0.274475	0.508	0.502	1.89e-29	CD14	CELF2
3e-33	-0.294297	0.286	0.311	9.01e-29	CD14	EDEM1
8.42e-33	-0.261698	0.485	0.486	2.53e-28	CD14	PNN
1.47e-32	-0.307399	0.318	0.346	4.43e-28	CD14	HIST1H1E
2.05e-32	-0.258607	0.402	0.424	6.17e-28	CD14	RPL39
2.09e-32	-0.319212	0.251	0.281	6.28e-28	CD14	LPCAT1
3.29e-31	-0.251863	0.48	0.48	9.88e-27	CD14	ZC3H11A
2.05e-30	-0.265965	0.398	0.408	6.17e-26	CD14	DYNLL2
3.27e-30	-0.268275	0.297	0.321	9.83e-26	CD14	APOBEC3C
1.84e-29	-0.250693	0.338	0.361	5.52e-25	CD14	UBR5
4.07e-29	-0.265414	0.307	0.332	1.22e-24	CD14	PTPRA
6.97e-29	-0.263315	0.343	0.363	2.1e-24	CD14	GOLGA3
1.06e-28	-0.254247	0.276	0.303	3.2e-24	CD14	PSD4
1.16e-28	-0.264071	0.296	0.319	3.47e-24	CD14	SBDS
1.03e-26	-0.337533	0.359	0.363	3.1e-22	CD14	PARP8
2.97e-26	-0.252135	0.366	0.384	8.93e-22	CD14	REST
5.27e-25	-0.278501	0.36	0.374	1.58e-20	CD14	ZNF292
6.73e-25	-0.262033	0.419	0.422	2.02e-20	CD14	RAPGEF1
6.88e-25	-0.253502	0.592	0.561	2.07e-20	CD14	STK10
1.83e-24	-0.253801	0.307	0.325	5.5e-20	CD14	ATP11B
5.46e-24	-0.263241	0.292	0.313	1.64e-19	CD14	TRAPPC10
5.65e-22	-0.264018	0.256	0.28	1.7e-17	CD14	BRWD1
1.28e-21	-0.253157	0.258	0.281	3.84e-17	CD14	USP24
2.05e-21	-0.253056	0.276	0.299	6.17e-17	CD14	ZKSCAN1
5.7e-21	-0.310388	0.402	0.398	1.71e-16	CD14	PAG1
9.77e-21	-0.268466	0.373	0.378	2.94e-16	CD14	PLEKHA2
4.72e-20	-0.404834	0.694	0.623	1.42e-15	CD14	RPL30
9.94e-20	-0.250464	0.326	0.337	2.99e-15	CD14	NLRC5
3.08e-19	-0.286821	0.371	0.371	9.27e-15	CD14	ST3GAL1
1.58e-18	-0.276328	0.289	0.299	4.76e-14	CD14	SPATA13
4.77e-18	-0.432104	0.32	0.322	1.44e-13	CD14	IFI6
6.64e-18	-0.275987	0.515	0.484	2e-13	CD14	SUN2
1.56e-17	-0.265119	0.449	0.432	4.69e-13	CD14	STAT5B
2.44e-12	-0.255004	0.604	0.498	7.33e-08	CD14	TNFAIP3
5.67e-11	-0.421248	0.417	0.394	1.7e-06	CD14	IL6ST
5.85e-11	-0.342924	0.256	0.257	1.76e-06	CD14	MAN1A1
2.03e-10	-0.457696	0.428	0.4	6.11e-06	CD14	XBP1
0	2.10767	0.783	0.153	0	Inflammatory CD14	IFI27
0	1.5786	0.996	0.357	0	Inflammatory CD14	VCAN
0	1.55423	0.932	0.262	0	Inflammatory CD14	IFITM3
0	1.50268	0.86	0.258	0	Inflammatory CD14	IFI6
0	1.42091	0.992	0.421	0	Inflammatory CD14	LYZ
0	1.40084	0.996	0.493	0	Inflammatory CD14	S100A8
0	1.38529	0.911	0.265	0	Inflammatory CD14	PLBD1
0	1.37356	0.998	0.492	0	Inflammatory CD14	S100A9
0	1.37062	0.966	0.303	0	Inflammatory CD14	MNDA
0	1.37055	0.938	0.35	0	Inflammatory CD14	TYMP
0	1.352	0.979	0.375	0	Inflammatory CD14	CYBB
0	1.33569	0.988	0.505	0	Inflammatory CD14	APLP2
0	1.32574	0.969	0.373	0	Inflammatory CD14	GRN
0	1.32411	0.86	0.261	0	Inflammatory CD14	S100A12
0	1.32315	0.977	0.333	0	Inflammatory CD14	FCN1
0	1.30633	0.673	0.05	0	Inflammatory CD14	SIGLEC1
0	1.29656	0.936	0.273	0	Inflammatory CD14	CD14
0	1.26948	0.908	0.253	0	Inflammatory CD14	SERPINA1
0	1.26316	0.788	0.196	0	Inflammatory CD14	CD163
0	1.23684	0.859	0.325	0	Inflammatory CD14	MX1
0	1.18978	0.997	0.63	0	Inflammatory CD14	CTSS
0	1.18935	0.756	0.197	0	Inflammatory CD14	OAS3
0	1.1766	0.888	0.25	0	Inflammatory CD14	FPR1
0	1.17436	0.769	0.174	0	Inflammatory CD14	IFI44L
0	1.1375	0.937	0.315	0	Inflammatory CD14	NCF2
0	1.11128	0.831	0.234	0	Inflammatory CD14	CD36
0	1.10107	0.827	0.236	0	Inflammatory CD14	KCTD12
0	1.09964	0.859	0.277	0	Inflammatory CD14	MPEG1
0	1.09538	0.694	0.156	0	Inflammatory CD14	RNASE2
0	1.08964	0.789	0.201	0	Inflammatory CD14	CLU
0	1.07985	0.999	0.746	0	Inflammatory CD14	PSAP
0	1.0687	0.846	0.257	0	Inflammatory CD14	EMILIN2
0	1.06471	0.595	0.221	0	Inflammatory CD14	IL8
0	1.05922	0.73	0.223	0	Inflammatory CD14	IFI44
0	1.05822	0.96	0.468	0	Inflammatory CD14	CTSB
0	1.03562	0.878	0.328	0	Inflammatory CD14	FGL2
0	1.03514	0.891	0.411	0	Inflammatory CD14	CTSD
0	1.02456	0.503	0.082	0	Inflammatory CD14	CES1
0	1.02354	0.768	0.234	0	Inflammatory CD14	ACSL1
0	1.01561	0.739	0.193	0	Inflammatory CD14	CD93
0	1.01247	0.533	0.118	0	Inflammatory CD14	APOBEC3A
0	1.00471	0.641	0.131	0	Inflammatory CD14	DYSF
0	1.00091	0.774	0.262	0	Inflammatory CD14	MX2
0	0.989092	0.812	0.234	0	Inflammatory CD14	MS4A6A
0	0.975771	0.965	0.421	0	Inflammatory CD14	TYROBP
0	0.968132	0.993	0.702	0	Inflammatory CD14	FTL
0	0.963214	0.685	0.209	0	Inflammatory CD14	CD300E
0	0.962148	0.786	0.289	0	Inflammatory CD14	DUSP6
0	0.94068	0.814	0.231	0	Inflammatory CD14	LILRB2
0	0.938846	0.951	0.485	0	Inflammatory CD14	TKT
0	0.925939	0.872	0.291	0	Inflammatory CD14	CST3
0	0.925508	0.616	0.172	0	Inflammatory CD14	CYP1B1
0	0.925018	0.741	0.224	0	Inflammatory CD14	MAFB
0	0.923297	0.585	0.116	0	Inflammatory CD14	ANPEP
0	0.921778	0.813	0.303	0	Inflammatory CD14	PGD
0	0.920215	0.769	0.243	0	Inflammatory CD14	CEBPD
0	0.916929	0.995	0.748	0	Inflammatory CD14	ITGB2
0	0.916651	0.717	0.192	0	Inflammatory CD14	LRP1
0	0.914903	0.686	0.245	0	Inflammatory CD14	ISG15
0	0.906002	0.814	0.322	0	Inflammatory CD14	MEGF9
0	0.90357	0.704	0.225	0	Inflammatory CD14	BLVRA
0	0.902777	0.78	0.304	0	Inflammatory CD14	OAS2
0	0.901322	0.943	0.573	0	Inflammatory CD14	PKM
0	0.893965	0.254	0.082	0	Inflammatory CD14	IL1R2
0	0.890937	0.629	0.154	0	Inflammatory CD14	STAB1
0	0.888943	0.862	0.396	0	Inflammatory CD14	LGALS1
0	0.888735	0.739	0.221	0	Inflammatory CD14	SLC11A1
0	0.888407	0.696	0.186	0	Inflammatory CD14	TLR4
0	0.887041	0.891	0.322	0	Inflammatory CD14	AIF1
0	0.885281	0.54	0.263	0	Inflammatory CD14	IFI30
0	0.883487	0.603	0.144	0	Inflammatory CD14	IFIT3
0	0.876637	0.664	0.198	0	Inflammatory CD14	DMXL2
0	0.875455	0.754	0.29	0	Inflammatory CD14	KLF4
0	0.871851	0.848	0.357	0	Inflammatory CD14	IL17RA
0	0.871366	0.907	0.486	0	Inflammatory CD14	ANXA2
0	0.866346	0.65	0.181	0	Inflammatory CD14	C19orf59
0	0.864241	0.77	0.251	0	Inflammatory CD14	CFP
0	0.859925	0.654	0.2	0	Inflammatory CD14	CCR2
0	0.854676	0.755	0.228	0	Inflammatory CD14	HCK
0	0.849779	0.683	0.214	0	Inflammatory CD14	OAS1
0	0.848136	0.633	0.157	0	Inflammatory CD14	CCR1
0	0.846536	0.66	0.174	0	Inflammatory CD14	TLR2
0	0.837288	0.825	0.386	0	Inflammatory CD14	GLUL
0	0.829937	0.712	0.235	0	Inflammatory CD14	CAPG
0	0.818679	0.686	0.206	0	Inflammatory CD14	CPVL
0	0.818287	0.591	0.139	0	Inflammatory CD14	MEFV
0	0.811242	0.967	0.601	0	Inflammatory CD14	FOS
0	0.805164	0.614	0.154	0	Inflammatory CD14	TNFSF13B
0	0.803402	0.863	0.434	0	Inflammatory CD14	SERPINB1
0	0.803232	0.594	0.146	0	Inflammatory CD14	BST1
0	0.797525	0.662	0.192	0	Inflammatory CD14	CLEC12A
0	0.794671	0.749	0.292	0	Inflammatory CD14	GNS
0	0.790479	0.771	0.311	0	Inflammatory CD14	CTSZ
0	0.787926	0.612	0.196	0	Inflammatory CD14	SCO2
0	0.7869	0.814	0.322	0	Inflammatory CD14	ITGAM
0	0.778728	0.744	0.279	0	Inflammatory CD14	CKAP4
0	0.777888	0.864	0.419	0	Inflammatory CD14	C10orf54
0	0.777158	0.65	0.19	0	Inflammatory CD14	PLXDC2
0	0.777003	0.788	0.32	0	Inflammatory CD14	AMICA1
0	0.771848	0.694	0.215	0	Inflammatory CD14	PTAFR
0	0.770594	0.664	0.212	0	Inflammatory CD14	LGALS9
0	0.769143	0.767	0.336	0	Inflammatory CD14	PPT1
0	0.768697	0.771	0.266	0	Inflammatory CD14	RAB31
0	0.762721	0.61	0.171	0	Inflammatory CD14	HK3
0	0.761956	0.708	0.293	0	Inflammatory CD14	CECR1
0	0.760106	0.687	0.214	0	Inflammatory CD14	TNFAIP2
0	0.760002	0.695	0.388	0	Inflammatory CD14	MTRNR2L1
0	0.759758	0.69	0.275	0	Inflammatory CD14	LAP3
0	0.757972	0.652	0.229	0	Inflammatory CD14	SCPEP1
0	0.757814	0.983	0.75	0	Inflammatory CD14	VIM
0	0.756536	0.82	0.37	0	Inflammatory CD14	TALDO1
0	0.755018	0.649	0.19	0	Inflammatory CD14	IGSF6
0	0.754256	0.877	0.443	0	Inflammatory CD14	TSPO
0	0.753917	0.419	0.06	0	Inflammatory CD14	IFIT1
0	0.75238	0.948	0.605	0	Inflammatory CD14	S100A6
0	0.749971	0.625	0.181	0	Inflammatory CD14	GCA
0	0.748738	0.568	0.138	0	Inflammatory CD14	SIRPA
0	0.743357	0.502	0.123	0	Inflammatory CD14	AQP9
0	0.743312	0.839	0.356	0	Inflammatory CD14	FGR
0	0.739826	0.875	0.496	0	Inflammatory CD14	H2AFY
0	0.73981	0.579	0.163	0	Inflammatory CD14	SULF2
0	0.739239	0.506	0.11	0	Inflammatory CD14	FAM198B
0	0.73822	0.639	0.221	0	Inflammatory CD14	DPYD
0	0.737349	0.8	0.364	0	Inflammatory CD14	RASSF2
0	0.736793	0.465	0.099	0	Inflammatory CD14	CRISPLD2
0	0.734613	0.667	0.262	0	Inflammatory CD14	PLXNC1
0	0.733514	0.703	0.264	0	Inflammatory CD14	EPSTI1
0	0.733205	0.614	0.173	0	Inflammatory CD14	LMO2
0	0.729517	0.714	0.243	0	Inflammatory CD14	RNF130
0	0.729193	0.643	0.195	0	Inflammatory CD14	TIMP2
0	0.726076	0.598	0.202	0	Inflammatory CD14	LRRK2
0	0.719252	0.627	0.2	0	Inflammatory CD14	ALDH2
0	0.717572	0.425	0.1	0	Inflammatory CD14	CR1
0	0.717532	0.441	0.066	0	Inflammatory CD14	CMPK2
0	0.714786	0.625	0.206	0	Inflammatory CD14	PLSCR1
0	0.714433	0.623	0.186	0	Inflammatory CD14	C5AR1
0	0.711976	0.633	0.199	0	Inflammatory CD14	IRAK3
0	0.710585	0.765	0.272	0	Inflammatory CD14	FCER1G
0	0.706571	0.729	0.324	0	Inflammatory CD14	FBXL5
0	0.706535	0.691	0.233	0	Inflammatory CD14	2020-03-01
0	0.699516	0.853	0.524	0	Inflammatory CD14	DUSP1
0	0.6981	0.742	0.375	0	Inflammatory CD14	METTL9
0	0.698029	0.852	0.468	0	Inflammatory CD14	S100A10
0	0.697942	0.593	0.166	0	Inflammatory CD14	CLEC7A
0	0.696627	0.493	0.136	0	Inflammatory CD14	ASGR2
0	0.695193	0.471	0.124	0	Inflammatory CD14	F5
0	0.694658	0.437	0.088	0	Inflammatory CD14	RSAD2
0	0.694426	0.664	0.218	0	Inflammatory CD14	GAS7
0	0.694318	0.643	0.207	0	Inflammatory CD14	BLVRB
0	0.6908	0.878	0.458	0	Inflammatory CD14	XAF1
0	0.687728	0.69	0.289	0	Inflammatory CD14	IFNGR1
0	0.687559	0.928	0.591	0	Inflammatory CD14	SELL
0	0.68713	0.621	0.193	0	Inflammatory CD14	CFD
0	0.683363	0.811	0.393	0	Inflammatory CD14	ANXA5
0	0.681013	0.668	0.225	0	Inflammatory CD14	S100A11
0	0.679279	0.625	0.216	0	Inflammatory CD14	PRKCD
0	0.677429	0.93	0.52	0	Inflammatory CD14	COTL1
0	0.677338	0.635	0.201	0	Inflammatory CD14	SLC7A7
0	0.675499	0.614	0.176	0	Inflammatory CD14	CSF3R
0	0.675281	0.572	0.168	0	Inflammatory CD14	FES
0	0.674901	0.713	0.294	0	Inflammatory CD14	CTSA
0	0.674882	0.657	0.258	0	Inflammatory CD14	CTNNA1
0	0.67449	0.566	0.17	0	Inflammatory CD14	FCGR2A
0	0.673307	0.855	0.46	0	Inflammatory CD14	CD63
0	0.671529	0.713	0.301	0	Inflammatory CD14	ATP6V1B2
0	0.670897	0.533	0.185	0	Inflammatory CD14	NCF1
0	0.668628	0.744	0.386	0	Inflammatory CD14	RGS2
0	0.667097	0.405	0.163	0	Inflammatory CD14	THBS1
0	0.666048	0.991	0.849	0	Inflammatory CD14	ACTB
0	0.664023	0.655	0.274	0	Inflammatory CD14	BACH1
0	0.662282	0.619	0.204	0	Inflammatory CD14	ALOX5
0	0.659447	0.867	0.523	0	Inflammatory CD14	SAT1
0	0.658152	0.819	0.465	0	Inflammatory CD14	PLAC8
0	0.657905	0.712	0.328	0	Inflammatory CD14	CDC42EP3
0	0.654896	0.686	0.254	0	Inflammatory CD14	BRI3
0	0.65434	0.83	0.391	0	Inflammatory CD14	LYN
0	0.650236	0.862	0.565	0	Inflammatory CD14	GAPDH
0	0.649582	0.568	0.179	0	Inflammatory CD14	CPPED1
0	0.649334	0.676	0.291	0	Inflammatory CD14	TNFSF10
0	0.648437	0.926	0.597	0	Inflammatory CD14	ANXA1
0	0.646788	0.958	0.679	0	Inflammatory CD14	SAMHD1
0	0.646407	0.763	0.349	0	Inflammatory CD14	GLIPR2
0	0.643167	0.667	0.241	0	Inflammatory CD14	FCGRT
0	0.643033	0.746	0.337	0	Inflammatory CD14	ASAH1
0	0.640738	0.697	0.286	0	Inflammatory CD14	CCDC88A
0	0.639292	0.55	0.176	0	Inflammatory CD14	MSRB1
0	0.639174	0.867	0.422	0	Inflammatory CD14	GPX1
0	0.63829	0.654	0.274	0	Inflammatory CD14	NAGK
0	0.637645	0.597	0.218	0	Inflammatory CD14	LY6E
0	0.635272	0.449	0.152	0	Inflammatory CD14	CD68
0	0.634166	0.826	0.399	0	Inflammatory CD14	SYK
0	0.632833	0.503	0.148	0	Inflammatory CD14	CYFIP1
0	0.632809	0.683	0.287	0	Inflammatory CD14	FKBP15
0	0.628701	0.514	0.145	0	Inflammatory CD14	TMEM170B
0	0.624664	0.465	0.118	0	Inflammatory CD14	TLR8
0	0.624393	0.893	0.582	0	Inflammatory CD14	ALDOA
0	0.624259	0.938	0.69	0	Inflammatory CD14	ENO1
0	0.623058	0.383	0.093	0	Inflammatory CD14	RETN
0	0.621286	0.532	0.162	0	Inflammatory CD14	CREG1
0	0.62084	0.451	0.106	0	Inflammatory CD14	FCGR1A
0	0.620533	0.707	0.352	0	Inflammatory CD14	LTA4H
0	0.619506	0.52	0.149	0	Inflammatory CD14	PYGL
0	0.617162	0.524	0.146	0	Inflammatory CD14	NFAM1
0	0.617012	0.595	0.234	0	Inflammatory CD14	GM2A
0	0.61647	0.392	0.084	0	Inflammatory CD14	2020-03-01
0	0.612411	0.545	0.186	0	Inflammatory CD14	IFNGR2
0	0.611396	0.62	0.467	0	Inflammatory CD14	FTH1
0	0.610272	0.349	0.102	0	Inflammatory CD14	H1F0
0	0.609706	0.617	0.215	0	Inflammatory CD14	RXRA
0	0.609106	0.725	0.308	0	Inflammatory CD14	PTPRE
0	0.608709	0.481	0.139	0	Inflammatory CD14	SORT1
0	0.605369	0.708	0.329	0	Inflammatory CD14	SPTLC2
0	0.602997	0.442	0.113	0	Inflammatory CD14	SIRPB1
0	0.600641	0.647	0.314	0	Inflammatory CD14	NAMPT
0	0.600507	0.967	0.683	0	Inflammatory CD14	SRGN
0	0.599451	0.38	0.11	0	Inflammatory CD14	IFIT2
0	0.597917	0.476	0.125	0	Inflammatory CD14	LILRA5
0	0.596648	0.499	0.139	0	Inflammatory CD14	SPI1
0	0.595797	0.929	0.558	0	Inflammatory CD14	S100A4
0	0.594818	0.602	0.225	0	Inflammatory CD14	LGALS3
0	0.593634	0.57	0.225	0	Inflammatory CD14	HEXB
0	0.593535	0.64	0.255	0	Inflammatory CD14	MYD88
0	0.58981	0.79	0.4	0	Inflammatory CD14	LYST
0	0.58588	0.411	0.148	0	Inflammatory CD14	VNN2
0	0.58538	0.674	0.311	0	Inflammatory CD14	RILPL2
0	0.584838	0.62	0.244	0	Inflammatory CD14	PYCARD
0	0.584613	0.718	0.333	0	Inflammatory CD14	SDCBP
0	0.584035	0.906	0.622	0	Inflammatory CD14	GRB2
0	0.582374	0.531	0.167	0	Inflammatory CD14	C19orf38
0	0.5823	0.674	0.298	0	Inflammatory CD14	SKAP2
0	0.579821	0.716	0.322	0	Inflammatory CD14	PIK3AP1
0	0.57935	0.447	0.12	0	Inflammatory CD14	IDH1
0	0.578845	0.649	0.307	0	Inflammatory CD14	VMP1
0	0.578773	0.763	0.436	0	Inflammatory CD14	PARP14
0	0.576273	0.366	0.101	0	Inflammatory CD14	RP11-1143G9.4
0	0.573492	0.61	0.251	0	Inflammatory CD14	DDX60L
0	0.573422	0.539	0.192	0	Inflammatory CD14	GAA
0	0.572136	0.417	0.113	0	Inflammatory CD14	NAIP
0	0.570889	0.406	0.102	0	Inflammatory CD14	MYOF
0	0.570258	0.684	0.303	0	Inflammatory CD14	THEMIS2
0	0.568365	0.993	0.878	0	Inflammatory CD14	LCP1
0	0.568236	0.467	0.126	0	Inflammatory CD14	SECTM1
0	0.567485	0.563	0.204	0	Inflammatory CD14	DPYSL2
0	0.567213	0.755	0.409	0	Inflammatory CD14	PICALM
0	0.567058	0.478	0.135	0	Inflammatory CD14	CSTA
0	0.566988	0.569	0.218	0	Inflammatory CD14	PAK1
0	0.565531	0.495	0.147	0	Inflammatory CD14	PILRA
0	0.56529	0.657	0.292	0	Inflammatory CD14	RTN3
0	0.564891	0.63	0.25	0	Inflammatory CD14	C1orf162
0	0.563976	0.459	0.129	0	Inflammatory CD14	CREB5
0	0.561979	0.556	0.188	0	Inflammatory CD14	SLC16A3
0	0.56002	0.646	0.275	0	Inflammatory CD14	NPC2
0	0.558934	0.972	0.772	0	Inflammatory CD14	OAZ1
0	0.557617	0.377	0.082	0	Inflammatory CD14	IL1RN
0	0.556497	0.559	0.25	0	Inflammatory CD14	KLF10
0	0.556282	0.643	0.266	0	Inflammatory CD14	CORO1C
0	0.556019	0.788	0.4	0	Inflammatory CD14	ZEB2
0	0.555034	0.907	0.641	0	Inflammatory CD14	ARPC5
0	0.553914	0.398	0.097	0	Inflammatory CD14	LILRA6
0	0.552392	0.556	0.203	0	Inflammatory CD14	IRF7
0	0.551613	0.771	0.412	0	Inflammatory CD14	ARRB2
0	0.550827	0.461	0.128	0	Inflammatory CD14	NFE2
0	0.547676	0.491	0.168	0	Inflammatory CD14	TGFBI
0	0.547049	0.404	0.095	0	Inflammatory CD14	OASL
0	0.546527	0.544	0.181	0	Inflammatory CD14	RASSF4
0	0.546055	0.555	0.215	0	Inflammatory CD14	PLIN3
0	0.542442	0.464	0.145	0	Inflammatory CD14	IMPA2
0	0.540778	0.54	0.214	0	Inflammatory CD14	LMNB1
0	0.54009	0.499	0.17	0	Inflammatory CD14	RBM47
0	0.539131	0.52	0.172	0	Inflammatory CD14	TNFRSF1A
0	0.538896	0.698	0.249	0	Inflammatory CD14	LST1
0	0.538348	0.443	0.117	0	Inflammatory CD14	TFEC
0	0.537562	0.478	0.148	0	Inflammatory CD14	PLXNB2
0	0.537228	0.286	0.111	0	Inflammatory CD14	EREG
0	0.535989	0.571	0.223	0	Inflammatory CD14	MXD1
0	0.535921	0.452	0.13	0	Inflammatory CD14	LILRA2
0	0.534791	0.919	0.647	0	Inflammatory CD14	ARPC1B
0	0.534739	0.641	0.269	0	Inflammatory CD14	LAT2
0	0.533767	0.66	0.306	0	Inflammatory CD14	CASP1
0	0.533194	0.678	0.341	0	Inflammatory CD14	RAB10
0	0.532336	0.592	0.241	0	Inflammatory CD14	KIAA0930
0	0.530996	0.681	0.319	0	Inflammatory CD14	PARP9
0	0.530182	0.407	0.112	0	Inflammatory CD14	KIAA1598
0	0.529743	0.633	0.263	0	Inflammatory CD14	AOAH
0	0.529454	0.508	0.171	0	Inflammatory CD14	PLAUR
0	0.52841	0.63	0.282	0	Inflammatory CD14	TET2
0	0.526954	0.44	0.129	0	Inflammatory CD14	SLC8A1
0	0.525627	0.481	0.146	0	Inflammatory CD14	CSF1R
0	0.52406	0.439	0.122	0	Inflammatory CD14	FAM129B
0	0.523758	0.555	0.205	0	Inflammatory CD14	TBXAS1
0	0.523226	0.402	0.107	0	Inflammatory CD14	MS4A4A
0	0.522215	0.855	0.474	0	Inflammatory CD14	MYO1F
0	0.521056	0.509	0.19	0	Inflammatory CD14	NCF4
0	0.520317	0.622	0.28	0	Inflammatory CD14	TPP1
0	0.518728	0.653	0.304	0	Inflammatory CD14	RHOG
0	0.517627	0.394	0.101	0	Inflammatory CD14	GLT1D1
0	0.517022	0.275	0.061	0	Inflammatory CD14	HP
0	0.515274	0.436	0.127	0	Inflammatory CD14	PRAM1
0	0.514876	0.867	0.516	0	Inflammatory CD14	TNFRSF1B
0	0.512632	0.608	0.286	0	Inflammatory CD14	LAMP2
0	0.509634	0.419	0.125	0	Inflammatory CD14	NLRP3
0	0.507858	0.499	0.213	0	Inflammatory CD14	AHR
0	0.507704	0.64	0.28	0	Inflammatory CD14	CTSH
0	0.507645	0.744	0.428	0	Inflammatory CD14	OS9
0	0.504635	0.63	0.283	0	Inflammatory CD14	MFSD1
0	0.503002	0.508	0.191	0	Inflammatory CD14	ETS2
0	0.502281	0.435	0.122	0	Inflammatory CD14	LTBR
0	0.501682	0.734	0.46	0	Inflammatory CD14	ZFP36
0	0.500839	0.966	0.756	0	Inflammatory CD14	LAPTM5
0	0.500352	0.762	0.403	0	Inflammatory CD14	IFITM2
0	0.499096	0.592	0.26	0	Inflammatory CD14	STAT2
0	0.49888	0.574	0.25	0	Inflammatory CD14	SNX27
0	0.498854	0.8	0.508	0	Inflammatory CD14	SH3BGRL3
0	0.497727	0.539	0.202	0	Inflammatory CD14	AGTRAP
0	0.497078	0.8	0.496	0	Inflammatory CD14	FKBP5
0	0.496555	0.578	0.231	0	Inflammatory CD14	TIMP1
0	0.495443	0.27	0.091	0	Inflammatory CD14	CCL3
0	0.494642	0.662	0.34	0	Inflammatory CD14	GLRX
0	0.494337	0.569	0.261	0	Inflammatory CD14	TMEM167A
0	0.494012	0.653	0.34	0	Inflammatory CD14	GLIPR1
0	0.493167	0.531	0.221	0	Inflammatory CD14	ATP6V1A
0	0.491965	0.696	0.383	0	Inflammatory CD14	WSB1
0	0.491244	0.696	0.361	0	Inflammatory CD14	PTTG1IP
0	0.489714	0.503	0.192	0	Inflammatory CD14	NUDT16
0	0.489098	0.491	0.179	0	Inflammatory CD14	QSOX1
0	0.488472	0.331	0.09	0	Inflammatory CD14	PADI4
0	0.486543	0.363	0.093	0	Inflammatory CD14	WDFY3
0	0.486369	0.716	0.388	0	Inflammatory CD14	ATP6V0B
0	0.486266	0.381	0.098	0	Inflammatory CD14	CD33
0	0.485306	0.739	0.411	0	Inflammatory CD14	FERMT3
0	0.484945	0.561	0.227	0	Inflammatory CD14	ZYX
0	0.484868	0.866	0.649	0	Inflammatory CD14	NFKBIA
0	0.484339	0.636	0.318	0	Inflammatory CD14	MAPK14
0	0.483726	0.358	0.11	0	Inflammatory CD14	C3AR1
0	0.483523	0.456	0.159	0	Inflammatory CD14	CD86
0	0.481768	0.724	0.419	0	Inflammatory CD14	SOD2
0	0.480069	0.49	0.194	0	Inflammatory CD14	APAF1
0	0.479135	0.426	0.139	0	Inflammatory CD14	RNF144B
0	0.479001	0.343	0.101	0	Inflammatory CD14	MARCO
0	0.478797	0.786	0.474	0	Inflammatory CD14	RTN4
0	0.475746	0.392	0.114	0	Inflammatory CD14	ALDH3B1
0	0.475599	0.641	0.32	0	Inflammatory CD14	RNH1
0	0.475071	0.471	0.17	0	Inflammatory CD14	UNC93B1
0	0.474897	0.348	0.114	0	Inflammatory CD14	ADM
0	0.473709	0.268	0.115	0	Inflammatory CD14	TMEM176B
0	0.47274	0.475	0.168	0	Inflammatory CD14	SLC43A2
0	0.471413	0.661	0.355	0	Inflammatory CD14	LRPAP1
0	0.471389	0.448	0.16	0	Inflammatory CD14	SULT1A1
0	0.470025	0.759	0.454	0	Inflammatory CD14	ZFAND5
0	0.469894	0.622	0.305	0	Inflammatory CD14	EIF2AK2
0	0.469836	0.342	0.09	0	Inflammatory CD14	HLX
0	0.468668	0.447	0.154	0	Inflammatory CD14	RAB3D
0	0.467477	0.555	0.252	0	Inflammatory CD14	NUMB
0	0.46709	0.546	0.246	0	Inflammatory CD14	CAT
0	0.466645	0.575	0.275	0	Inflammatory CD14	YWHAG
0	0.46633	0.394	0.125	0	Inflammatory CD14	RNASE6
0	0.464249	0.376	0.106	0	Inflammatory CD14	FGD4
0	0.462478	0.473	0.188	0	Inflammatory CD14	SCARB2
0	0.462336	0.35	0.085	0	Inflammatory CD14	FPR2
0	0.461955	0.497	0.2	0	Inflammatory CD14	B4GALT5
0	0.461955	0.468	0.171	0	Inflammatory CD14	SPECC1
0	0.461664	0.906	0.652	0	Inflammatory CD14	GNAI2
0	0.461378	0.481	0.199	0	Inflammatory CD14	LACTB
0	0.460993	0.343	0.086	0	Inflammatory CD14	QPCT
0	0.45995	0.372	0.098	0	Inflammatory CD14	MGST1
0	0.458411	0.52	0.216	0	Inflammatory CD14	LILRB1
0	0.458228	0.749	0.418	0	Inflammatory CD14	RAC1
0	0.458028	0.359	0.099	0	Inflammatory CD14	LILRA1
0	0.456373	0.326	0.073	0	Inflammatory CD14	RIN2
0	0.456213	0.657	0.324	0	Inflammatory CD14	PLEKHO1
0	0.454612	0.549	0.244	0	Inflammatory CD14	OGFRL1
0	0.45401	0.409	0.118	0	Inflammatory CD14	LRRC25
0	0.453865	0.498	0.207	0	Inflammatory CD14	NADK
0	0.45266	0.46	0.17	0	Inflammatory CD14	STX11
0	0.451804	0.341	0.091	0	Inflammatory CD14	ADAM9
0	0.451216	0.57	0.281	0	Inflammatory CD14	BST2
0	0.450553	0.613	0.277	0	Inflammatory CD14	APOBR
0	0.449885	0.872	0.522	0	Inflammatory CD14	EFHD2
0	0.449574	0.513	0.258	0	Inflammatory CD14	SGK1
0	0.449192	0.5	0.202	0	Inflammatory CD14	CEBPB
0	0.447762	0.407	0.138	0	Inflammatory CD14	LY86
0	0.447384	0.457	0.176	0	Inflammatory CD14	IFI35
0	0.446768	0.694	0.393	0	Inflammatory CD14	SH3BGRL
0	0.4465	0.65	0.346	0	Inflammatory CD14	TCIRG1
0	0.446042	0.407	0.14	0	Inflammatory CD14	SIGLEC10
0	0.445123	0.67	0.354	0	Inflammatory CD14	QKI
0	0.4436	0.331	0.086	0	Inflammatory CD14	ST14
0	0.443093	0.616	0.321	0	Inflammatory CD14	NOTCH2
0	0.443084	0.916	0.697	0	Inflammatory CD14	RHOA
0	0.443051	0.375	0.128	0	Inflammatory CD14	ASPH
0	0.442165	0.3	0.137	0	Inflammatory CD14	SLC39A8
0	0.441306	0.394	0.121	0	Inflammatory CD14	JDP2
0	0.441045	0.704	0.4	0	Inflammatory CD14	EHBP1L1
0	0.440848	0.451	0.171	0	Inflammatory CD14	SLC6A6
0	0.439987	0.574	0.253	0	Inflammatory CD14	ARHGAP26
0	0.439719	0.496	0.2	0	Inflammatory CD14	ATP6V0D1
0	0.439076	0.377	0.123	0	Inflammatory CD14	KIF13A
0	0.438996	0.495	0.214	0	Inflammatory CD14	NFIL3
0	0.43867	0.377	0.126	0	Inflammatory CD14	LILRB4
0	0.437083	0.371	0.11	0	Inflammatory CD14	CD1D
0	0.436775	0.454	0.169	0	Inflammatory CD14	NACC2
0	0.436489	0.508	0.209	0	Inflammatory CD14	SNX10
0	0.435227	0.488	0.207	0	Inflammatory CD14	SQRDL
0	0.432542	0.499	0.222	0	Inflammatory CD14	JAK2
0	0.431895	0.595	0.304	0	Inflammatory CD14	WARS
0	0.431831	0.608	0.294	0	Inflammatory CD14	GSTO1
0	0.431023	0.647	0.341	0	Inflammatory CD14	SNX2
0	0.430264	0.333	0.096	0	Inflammatory CD14	OSCAR
0	0.429411	0.332	0.13	0	Inflammatory CD14	SAP30
0	0.428784	0.399	0.141	0	Inflammatory CD14	NINJ1
0	0.428065	0.378	0.111	0	Inflammatory CD14	LILRB3
0	0.426996	0.539	0.255	0	Inflammatory CD14	AP1S2
0	0.426534	0.281	0.064	0	Inflammatory CD14	FCGR1B
0	0.426359	0.279	0.066	0	Inflammatory CD14	FFAR2
0	0.426022	0.303	0.072	0	Inflammatory CD14	NLRC4
0	0.42596	0.359	0.101	0	Inflammatory CD14	CSF2RA
0	0.425109	0.408	0.143	0	Inflammatory CD14	C9orf72
0	0.425049	0.456	0.174	0	Inflammatory CD14	FGD2
0	0.423254	0.474	0.202	0	Inflammatory CD14	MLKL
0	0.422374	0.697	0.389	0	Inflammatory CD14	RAB7A
0	0.42232	0.548	0.258	0	Inflammatory CD14	IL10RB
0	0.421194	0.49	0.203	0	Inflammatory CD14	BCL2A1
0	0.421014	0.339	0.092	0	Inflammatory CD14	LPCAT2
0	0.420966	0.327	0.088	0	Inflammatory CD14	NLRP12
0	0.420813	0.928	0.714	0	Inflammatory CD14	IQGAP1
0	0.420525	0.349	0.118	0	Inflammatory CD14	CHST15
0	0.419053	0.363	0.107	0	Inflammatory CD14	ADAP2
0	0.416183	0.343	0.111	0	Inflammatory CD14	HMOX1
0	0.416178	0.342	0.16	0	Inflammatory CD14	ATF3
0	0.416126	0.457	0.178	0	Inflammatory CD14	DSE
0	0.415878	0.461	0.185	0	Inflammatory CD14	NAGA
0	0.415802	0.512	0.249	0	Inflammatory CD14	ACSL4
0	0.41523	0.337	0.084	0	Inflammatory CD14	SIGLEC9
0	0.41521	0.532	0.235	0	Inflammatory CD14	RALB
0	0.414435	0.589	0.308	0	Inflammatory CD14	CSGALNACT2
0	0.41374	0.791	0.493	0	Inflammatory CD14	NCOA4
0	0.41201	0.567	0.285	0	Inflammatory CD14	IRS2
0	0.411683	0.306	0.08	0	Inflammatory CD14	HPSE
0	0.411419	0.416	0.156	0	Inflammatory CD14	MBOAT7
0	0.411371	0.511	0.234	0	Inflammatory CD14	TRIB1
0	0.411062	0.804	0.571	0	Inflammatory CD14	PGK1
0	0.410829	0.757	0.463	0	Inflammatory CD14	ZNF106
0	0.410731	0.815	0.555	0	Inflammatory CD14	CAPN2
0	0.4103	0.535	0.254	0	Inflammatory CD14	STX10
0	0.410156	0.694	0.398	0	Inflammatory CD14	PLEC
0	0.40922	0.493	0.249	0	Inflammatory CD14	SAMSN1
0	0.408746	0.523	0.242	0	Inflammatory CD14	ARAP1
0	0.407283	0.38	0.121	0	Inflammatory CD14	CD302
0	0.406815	0.71	0.402	0	Inflammatory CD14	VASP
0	0.406387	0.534	0.233	0	Inflammatory CD14	GNAQ
0	0.405849	0.329	0.109	0	Inflammatory CD14	HK2
0	0.404834	0.538	0.256	0	Inflammatory CD14	AGFG1
0	0.404327	0.412	0.165	0	Inflammatory CD14	GLB1
0	0.403082	0.327	0.128	0	Inflammatory CD14	HIP1
0	0.402506	0.764	0.463	0	Inflammatory CD14	STAT1
0	0.401679	0.526	0.243	0	Inflammatory CD14	AGO4
0	0.400583	0.349	0.117	0	Inflammatory CD14	DOK3
0	0.400489	0.872	0.549	0	Inflammatory CD14	PLEK
0	0.400446	0.438	0.19	0	Inflammatory CD14	CNIH4
0	0.399613	0.332	0.101	0	Inflammatory CD14	KCNE3
0	0.399292	0.384	0.14	0	Inflammatory CD14	FRAT2
0	0.398412	0.342	0.113	0	Inflammatory CD14	KYNU
0	0.398329	0.577	0.302	0	Inflammatory CD14	CLTA
0	0.396279	0.401	0.174	0	Inflammatory CD14	MARCKS
0	0.396078	0.321	0.099	0	Inflammatory CD14	RHOU
0	0.394234	0.41	0.154	0	Inflammatory CD14	TOM1
0	0.393931	0.946	0.783	0	Inflammatory CD14	TPM3
0	0.393716	0.393	0.141	0	Inflammatory CD14	GNA15
0	0.39265	0.539	0.267	0	Inflammatory CD14	SHKBP1
0	0.392301	0.31	0.091	0	Inflammatory CD14	LILRA3
0	0.392251	0.431	0.167	0	Inflammatory CD14	FAM105A
0	0.392053	0.933	0.747	0	Inflammatory CD14	CAP1
0	0.391659	0.541	0.253	0	Inflammatory CD14	MAPKAPK3
0	0.391339	0.784	0.515	0	Inflammatory CD14	CAPNS1
0	0.390731	0.493	0.228	0	Inflammatory CD14	GSR
0	0.390517	0.466	0.209	0	Inflammatory CD14	GIMAP8
0	0.388672	0.916	0.744	0	Inflammatory CD14	ACTR2
0	0.388538	0.571	0.321	0	Inflammatory CD14	UBE2L6
0	0.388348	0.469	0.211	0	Inflammatory CD14	OSBPL11
0	0.386488	0.469	0.194	0	Inflammatory CD14	ADRBK2
0	0.386446	0.476	0.242	0	Inflammatory CD14	VAMP5
0	0.38546	0.296	0.078	0	Inflammatory CD14	HRH2
0	0.385252	0.61	0.328	0	Inflammatory CD14	ATG3
0	0.384346	0.354	0.129	0	Inflammatory CD14	TRPS1
0	0.383979	0.478	0.238	0	Inflammatory CD14	PIM3
0	0.383648	0.471	0.21	0	Inflammatory CD14	COLGALT1
0	0.382827	0.372	0.131	0	Inflammatory CD14	BCL6
0	0.382726	0.398	0.152	0	Inflammatory CD14	ZSWIM6
0	0.38221	0.458	0.164	0	Inflammatory CD14	MPP1
0	0.381775	0.569	0.294	0	Inflammatory CD14	LAPTM4A
0	0.381208	0.359	0.113	0	Inflammatory CD14	IRF5
0	0.380285	0.421	0.205	0	Inflammatory CD14	C20orf24
0	0.380254	0.565	0.285	0	Inflammatory CD14	CAPZA2
0	0.380163	0.403	0.161	0	Inflammatory CD14	TET3
0	0.379725	0.307	0.089	0	Inflammatory CD14	FLVCR2
0	0.378953	0.579	0.302	0	Inflammatory CD14	RGS19
0	0.378778	0.394	0.16	0	Inflammatory CD14	ATP11A
0	0.378203	0.537	0.265	0	Inflammatory CD14	FKBP1A
0	0.376659	0.563	0.294	0	Inflammatory CD14	LAMTOR1
0	0.375191	0.605	0.343	0	Inflammatory CD14	EVI2B
0	0.374952	0.615	0.327	0	Inflammatory CD14	CNPY3
0	0.374893	0.368	0.125	0	Inflammatory CD14	SLC15A3
0	0.374572	0.344	0.122	0	Inflammatory CD14	SEMA4A
0	0.374458	0.311	0.101	0	Inflammatory CD14	CLEC4E
0	0.373948	0.411	0.17	0	Inflammatory CD14	RNPEP
0	0.373826	0.435	0.192	0	Inflammatory CD14	IFIH1
0	0.373735	0.367	0.127	0	Inflammatory CD14	AP5B1
0	0.373276	0.434	0.175	0	Inflammatory CD14	ITGAX
0	0.371962	0.296	0.081	0	Inflammatory CD14	NPL
0	0.370866	0.36	0.127	0	Inflammatory CD14	SMCO4
0	0.370325	0.326	0.108	0	Inflammatory CD14	EPB41L3
0	0.369972	0.403	0.171	0	Inflammatory CD14	HSPA1A
0	0.369032	0.732	0.471	0	Inflammatory CD14	HMGB2
0	0.368283	0.774	0.531	0	Inflammatory CD14	PPP1R15A
0	0.368262	0.721	0.471	0	Inflammatory CD14	USP15
0	0.366614	0.447	0.234	0	Inflammatory CD14	PLIN2
0	0.366274	0.382	0.128	0	Inflammatory CD14	RAB32
0	0.365998	0.827	0.573	0	Inflammatory CD14	ARF1
0	0.36589	0.598	0.332	0	Inflammatory CD14	MGAT1
0	0.365618	0.362	0.134	0	Inflammatory CD14	DOCK5
0	0.364607	0.613	0.351	0	Inflammatory CD14	CLIC1
0	0.363776	0.417	0.18	0	Inflammatory CD14	PHC2
0	0.363741	0.406	0.171	0	Inflammatory CD14	NAPRT1
0	0.363335	0.349	0.122	0	Inflammatory CD14	FBP1
0	0.363094	0.501	0.227	0	Inflammatory CD14	LAIR1
0	0.362607	0.509	0.257	0	Inflammatory CD14	TRIM25
0	0.362337	0.623	0.359	0	Inflammatory CD14	ATP6AP2
0	0.362132	0.586	0.325	0	Inflammatory CD14	CHMP2A
0	0.361999	0.456	0.198	0	Inflammatory CD14	DENND5A
0	0.361587	0.464	0.215	0	Inflammatory CD14	ZDHHC7
0	0.361217	0.275	0.078	0	Inflammatory CD14	TNS3
0	0.360487	0.354	0.127	0	Inflammatory CD14	DUSP3
0	0.358996	0.432	0.197	0	Inflammatory CD14	APP
0	0.35816	0.361	0.14	0	Inflammatory CD14	KDM1B
0	0.357687	0.64	0.36	0	Inflammatory CD14	HK1
0	0.357027	0.512	0.252	0	Inflammatory CD14	AP2S1
0	0.356834	0.495	0.246	0	Inflammatory CD14	FAR1
0	0.356339	0.316	0.106	0	Inflammatory CD14	SLC31A2
0	0.355973	0.261	0.074	0	Inflammatory CD14	P2RY13
0	0.354491	0.364	0.143	0	Inflammatory CD14	FRAT1
0	0.353993	0.592	0.329	0	Inflammatory CD14	UPP1
0	0.353631	0.33	0.141	0	Inflammatory CD14	PFKFB3
0	0.352215	0.469	0.222	0	Inflammatory CD14	ITPK1
0	0.351291	0.439	0.185	0	Inflammatory CD14	ANXA4
0	0.351239	0.495	0.239	0	Inflammatory CD14	CARD16
0	0.351051	0.388	0.165	0	Inflammatory CD14	DNTTIP1
0	0.35094	0.367	0.129	0	Inflammatory CD14	IL13RA1
0	0.350708	0.648	0.381	0	Inflammatory CD14	NCKAP1L
0	0.350646	0.957	0.828	0	Inflammatory CD14	MYL6
0	0.350095	0.54	0.291	0	Inflammatory CD14	DNAJC13
0	0.349963	0.361	0.136	0	Inflammatory CD14	GRINA
0	0.347802	0.703	0.44	0	Inflammatory CD14	ATP6V0E1
0	0.347522	0.385	0.159	0	Inflammatory CD14	LINC00936
0	0.347448	0.507	0.246	0	Inflammatory CD14	NUP214
0	0.347059	0.478	0.231	0	Inflammatory CD14	EMP3
0	0.345473	0.512	0.261	0	Inflammatory CD14	SPG21
0	0.345382	0.377	0.156	0	Inflammatory CD14	FUCA2
0	0.345005	0.275	0.073	0	Inflammatory CD14	TBC1D2
0	0.344775	0.639	0.382	0	Inflammatory CD14	FLII
0	0.342791	0.274	0.072	0	Inflammatory CD14	NOD2
0	0.342274	0.893	0.71	0	Inflammatory CD14	SERF2
0	0.341622	0.636	0.379	0	Inflammatory CD14	MBD2
0	0.341099	0.912	0.728	0	Inflammatory CD14	CFL1
0	0.339666	0.5	0.25	0	Inflammatory CD14	GNG5
0	0.338912	0.333	0.12	0	Inflammatory CD14	ACER3
0	0.338004	0.653	0.384	0	Inflammatory CD14	MAP3K1
0	0.337598	0.66	0.408	0	Inflammatory CD14	COPA
0	0.337487	0.576	0.308	0	Inflammatory CD14	WAS
0	0.336693	0.353	0.154	0	Inflammatory CD14	RRP12
0	0.336605	0.802	0.561	0	Inflammatory CD14	IFI16
0	0.336478	0.451	0.248	0	Inflammatory CD14	CDKN1A
0	0.335399	0.763	0.521	0	Inflammatory CD14	DOCK8
0	0.335053	0.372	0.136	0	Inflammatory CD14	SCIMP
0	0.334074	0.444	0.212	0	Inflammatory CD14	BID
0	0.333984	0.461	0.217	0	Inflammatory CD14	HSBP1
0	0.333693	0.337	0.127	0	Inflammatory CD14	CSF2RB
0	0.333469	0.338	0.13	0	Inflammatory CD14	SRGAP2
0	0.33228	0.797	0.553	0	Inflammatory CD14	LDHA
0	0.332154	0.573	0.318	0	Inflammatory CD14	AGPAT3
0	0.332102	0.659	0.394	0	Inflammatory CD14	CD55
0	0.331285	0.786	0.57	0	Inflammatory CD14	CALM2
0	0.331081	0.307	0.098	0	Inflammatory CD14	STX3
0	0.330763	0.426	0.197	0	Inflammatory CD14	TTC7A
0	0.330499	0.576	0.326	0	Inflammatory CD14	UQCRC1
0	0.328894	0.439	0.215	0	Inflammatory CD14	HSD17B4
0	0.328766	0.315	0.108	0	Inflammatory CD14	EMR2
0	0.328558	0.723	0.439	0	Inflammatory CD14	GSTP1
0	0.328444	0.602	0.346	0	Inflammatory CD14	SSH2
0	0.327596	0.55	0.305	0	Inflammatory CD14	RBPJ
0	0.327418	0.484	0.237	0	Inflammatory CD14	ASAP1
0	0.327316	0.473	0.234	0	Inflammatory CD14	TPD52L2
0	0.326985	0.371	0.141	0	Inflammatory CD14	HELZ2
0	0.32692	0.35	0.149	0	Inflammatory CD14	F13A1
0	0.326878	0.424	0.207	0	Inflammatory CD14	PRDX3
0	0.326872	0.293	0.093	0	Inflammatory CD14	CEBPA
0	0.325826	0.438	0.211	0	Inflammatory CD14	PSEN1
0	0.325696	0.637	0.371	0	Inflammatory CD14	YWHAE
0	0.325687	0.593	0.35	0	Inflammatory CD14	DICER1
0	0.325559	0.639	0.365	0	Inflammatory CD14	SAMD9L
0	0.323946	0.377	0.168	0	Inflammatory CD14	CBR1
0	0.323938	0.728	0.444	0	Inflammatory CD14	PTPN6
0	0.323356	0.456	0.223	0	Inflammatory CD14	ZCCHC2
0	0.322483	0.42	0.192	0	Inflammatory CD14	COMT
0	0.322094	0.642	0.347	0	Inflammatory CD14	TRIM22
0	0.321108	0.749	0.484	0	Inflammatory CD14	STAT6
0	0.320968	0.573	0.325	0	Inflammatory CD14	USP3
0	0.320771	0.689	0.428	0	Inflammatory CD14	ARPC3
0	0.320459	0.423	0.211	0	Inflammatory CD14	NT5C2
0	0.319561	0.521	0.267	0	Inflammatory CD14	CUX1
0	0.319427	0.42	0.201	0	Inflammatory CD14	IFI27L2
0	0.319152	0.309	0.119	0	Inflammatory CD14	HERC5
0	0.318888	0.478	0.233	0	Inflammatory CD14	SNX18
0	0.318866	0.303	0.1	0	Inflammatory CD14	RNF135
0	0.318683	0.362	0.183	0	Inflammatory CD14	OTUD1
0	0.317626	0.608	0.379	0	Inflammatory CD14	NFKBIZ
0	0.317106	0.438	0.203	0	Inflammatory CD14	LEPROT
0	0.317042	0.373	0.167	0	Inflammatory CD14	H2AFJ
0	0.316798	0.39	0.174	0	Inflammatory CD14	MICU1
0	0.315701	0.28	0.098	0	Inflammatory CD14	DRAM1
0	0.315422	0.421	0.2	0	Inflammatory CD14	IMPDH1
0	0.314798	0.569	0.317	0	Inflammatory CD14	SLC38A10
0	0.314564	0.58	0.328	0	Inflammatory CD14	GNB2
0	0.313888	0.457	0.23	0	Inflammatory CD14	CHP1
0	0.313253	0.38	0.168	0	Inflammatory CD14	SH2B3
0	0.313089	0.659	0.41	0	Inflammatory CD14	SHISA5
0	0.311505	0.373	0.164	0	Inflammatory CD14	PEPD
0	0.311282	0.651	0.405	0	Inflammatory CD14	CHMP4B
0	0.311197	0.31	0.111	0	Inflammatory CD14	UBE2D1
0	0.310788	0.279	0.109	0	Inflammatory CD14	FADS1
0	0.310503	0.445	0.221	0	Inflammatory CD14	HSD17B11
0	0.309703	0.47	0.246	0	Inflammatory CD14	HADHB
0	0.30945	0.644	0.402	0	Inflammatory CD14	PTEN
0	0.308676	0.254	0.082	0	Inflammatory CD14	CTSL
0	0.308095	0.488	0.263	0	Inflammatory CD14	ATP6AP1
0	0.307748	0.326	0.12	0	Inflammatory CD14	PLXND1
0	0.307554	0.362	0.162	0	Inflammatory CD14	CAMKK2
0	0.307214	0.428	0.199	0	Inflammatory CD14	VAMP3
0	0.305583	0.597	0.36	0	Inflammatory CD14	GPCPD1
0	0.305094	0.258	0.083	0	Inflammatory CD14	CLEC4A
0	0.30498	0.851	0.639	0	Inflammatory CD14	ADAR
0	0.304697	0.357	0.157	0	Inflammatory CD14	G6PD
0	0.304485	0.676	0.423	0	Inflammatory CD14	CMTM6
0	0.304331	0.343	0.157	0	Inflammatory CD14	MAFG
0	0.303832	0.285	0.106	0	Inflammatory CD14	MICAL2
0	0.30369	0.46	0.228	0	Inflammatory CD14	CRTAP
0	0.303676	0.388	0.177	0	Inflammatory CD14	DIAPH2
0	0.302283	0.6	0.361	0	Inflammatory CD14	RNF149
0	0.301959	0.284	0.099	0	Inflammatory CD14	TOR1B
0	0.3019	0.666	0.436	0	Inflammatory CD14	ADAM10
0	0.300793	0.448	0.229	0	Inflammatory CD14	RNF13
0	0.300501	0.523	0.287	0	Inflammatory CD14	SOCS3
0	0.29903	0.311	0.123	0	Inflammatory CD14	KIAA0513
0	0.298239	0.358	0.161	0	Inflammatory CD14	MID1IP1
0	0.298105	0.361	0.169	0	Inflammatory CD14	EHD4
0	0.297806	0.433	0.221	0	Inflammatory CD14	CPD
0	0.297023	0.309	0.121	0	Inflammatory CD14	RNF24
0	0.296719	0.612	0.33	0	Inflammatory CD14	FAM129A
0	0.29671	0.676	0.437	0	Inflammatory CD14	PSMA4
0	0.296152	0.652	0.399	0	Inflammatory CD14	APBB1IP
0	0.296005	0.496	0.251	0	Inflammatory CD14	PSTPIP1
0	0.295665	0.417	0.217	0	Inflammatory CD14	LDLR
0	0.29483	0.67	0.42	0	Inflammatory CD14	SLC2A3
0	0.294324	0.557	0.305	0	Inflammatory CD14	DTX3L
0	0.293909	0.632	0.362	0	Inflammatory CD14	IL6R
0	0.293732	0.255	0.096	0	Inflammatory CD14	CLMN
0	0.292243	0.294	0.107	0	Inflammatory CD14	AGPAT2
0	0.29214	0.546	0.312	0	Inflammatory CD14	RAB1A
0	0.292121	0.469	0.237	0	Inflammatory CD14	MEF2A
0	0.292014	0.288	0.108	0	Inflammatory CD14	TREM1
0	0.291866	0.4	0.186	0	Inflammatory CD14	MAP3K11
0	0.291283	0.528	0.273	0	Inflammatory CD14	METTL7A
0	0.290219	0.466	0.224	0	Inflammatory CD14	RIN3
0	0.290173	0.415	0.203	0	Inflammatory CD14	OGFR
0	0.290009	0.336	0.143	0	Inflammatory CD14	RELT
0	0.289275	0.399	0.191	0	Inflammatory CD14	TMEM165
0	0.288828	0.412	0.192	0	Inflammatory CD14	RHOT1
0	0.288604	0.811	0.577	0	Inflammatory CD14	CYBA
0	0.28842	0.348	0.154	0	Inflammatory CD14	USP32
0	0.287836	0.569	0.348	0	Inflammatory CD14	NUCB1
0	0.287198	0.459	0.24	0	Inflammatory CD14	DNAJC5
0	0.286451	0.49	0.277	0	Inflammatory CD14	CUL1
0	0.286331	0.309	0.129	0	Inflammatory CD14	PLD3
0	0.286298	0.347	0.163	0	Inflammatory CD14	PRCP
0	0.285309	0.415	0.202	0	Inflammatory CD14	TMEM127
0	0.285089	0.253	0.082	0	Inflammatory CD14	GNB4
0	0.284663	0.343	0.141	0	Inflammatory CD14	CHMP5
0	0.284621	0.526	0.303	0	Inflammatory CD14	TM9SF2
0	0.284511	0.437	0.242	0	Inflammatory CD14	PRELID1
0	0.284417	0.466	0.26	0	Inflammatory CD14	TLE3
0	0.284413	0.399	0.198	0	Inflammatory CD14	PGAM1
0	0.284256	0.481	0.248	0	Inflammatory CD14	FNDC3B
0	0.282824	0.318	0.126	0	Inflammatory CD14	LTB4R
0	0.282559	0.319	0.13	0	Inflammatory CD14	PRKACA
0	0.281899	0.366	0.16	0	Inflammatory CD14	C9orf89
0	0.281802	0.709	0.466	0	Inflammatory CD14	CAPZA1
0	0.281627	0.461	0.237	0	Inflammatory CD14	RUNX1
0	0.280572	0.364	0.17	0	Inflammatory CD14	MAN2B1
0	0.280561	0.405	0.193	0	Inflammatory CD14	MTMR3
0	0.28034	0.353	0.159	0	Inflammatory CD14	NPTN
0	0.278679	0.347	0.15	0	Inflammatory CD14	POR
0	0.278398	0.554	0.325	0	Inflammatory CD14	COX8A
0	0.277558	0.885	0.643	0	Inflammatory CD14	FYB
0	0.276845	0.372	0.175	0	Inflammatory CD14	SSFA2
0	0.276579	0.504	0.288	0	Inflammatory CD14	PCMT1
0	0.275706	0.302	0.126	0	Inflammatory CD14	SNX30
0	0.275543	0.611	0.357	0	Inflammatory CD14	PLCB2
0	0.275338	0.735	0.506	0	Inflammatory CD14	MOB1A
0	0.274579	0.503	0.275	0	Inflammatory CD14	HEBP2
0	0.273998	0.605	0.379	0	Inflammatory CD14	LAMP1
0	0.273125	0.498	0.272	0	Inflammatory CD14	KIAA1033
0	0.272843	0.265	0.094	0	Inflammatory CD14	SERPINB8
0	0.272673	0.441	0.232	0	Inflammatory CD14	NMI
0	0.272523	0.369	0.173	0	Inflammatory CD14	MTF1
0	0.272125	0.46	0.233	0	Inflammatory CD14	PARVG
0	0.271799	0.282	0.101	0	Inflammatory CD14	MCTP1
0	0.271434	0.376	0.167	0	Inflammatory CD14	SUSD1
0	0.2714	0.332	0.134	0	Inflammatory CD14	GSN
0	0.270767	0.406	0.199	0	Inflammatory CD14	RCOR1
0	0.270385	0.777	0.537	0	Inflammatory CD14	CAST
0	0.270006	0.399	0.213	0	Inflammatory CD14	ADAM17
0	0.269486	0.485	0.264	0	Inflammatory CD14	NCOR2
0	0.269325	0.364	0.172	0	Inflammatory CD14	NAPA
0	0.268809	0.343	0.147	0	Inflammatory CD14	FAM46A
0	0.267038	0.41	0.211	0	Inflammatory CD14	EIF4E3
0	0.266223	0.477	0.268	0	Inflammatory CD14	MAP2K1
0	0.266108	0.254	0.092	0	Inflammatory CD14	HHEX
0	0.265814	0.533	0.307	0	Inflammatory CD14	HIPK3
0	0.26534	0.307	0.124	0	Inflammatory CD14	ITGA5
0	0.265175	0.925	0.746	0	Inflammatory CD14	MSN
0	0.264865	0.508	0.297	0	Inflammatory CD14	FLOT2
0	0.264665	0.446	0.229	0	Inflammatory CD14	MAP3K8
0	0.263451	0.355	0.165	0	Inflammatory CD14	FAM49A
0	0.263417	0.925	0.757	0	Inflammatory CD14	TLN1
0	0.263351	0.302	0.135	0	Inflammatory CD14	SLC2A6
0	0.261458	0.491	0.28	0	Inflammatory CD14	MAP3K3
0	0.260153	0.385	0.189	0	Inflammatory CD14	RIT1
0	0.2588	0.36	0.182	0	Inflammatory CD14	ST8SIA4
0	0.258196	0.378	0.173	0	Inflammatory CD14	DDX58
0	0.257042	0.361	0.175	0	Inflammatory CD14	BTK
0	0.255174	0.449	0.253	0	Inflammatory CD14	ATP6V1F
0	0.254552	0.378	0.182	0	Inflammatory CD14	TRIM8
0	0.254318	0.392	0.205	0	Inflammatory CD14	GALNT2
0	0.253909	0.428	0.225	0	Inflammatory CD14	CSTB
0	0.253755	0.539	0.305	0	Inflammatory CD14	RAB11FIP1
0	0.253181	0.325	0.147	0	Inflammatory CD14	P2RX4
0	0.252187	0.556	0.296	0	Inflammatory CD14	BNIP3L
0	0.252046	0.426	0.221	0	Inflammatory CD14	ARHGAP27
0	0.25191	0.26	0.096	0	Inflammatory CD14	RP2
0	0.25162	0.261	0.101	0	Inflammatory CD14	CXorf21
0	0.251454	0.374	0.194	0	Inflammatory CD14	SRA1
0	0.251031	0.467	0.237	0	Inflammatory CD14	SH3BP2
0	0.250614	0.577	0.347	0	Inflammatory CD14	RAB27A
0	0.250409	0.291	0.12	0	Inflammatory CD14	PLEKHO2
0	-0.36399	0.912	0.889	0	Inflammatory CD14	GNB2L1
0	-0.394315	0.908	0.896	0	Inflammatory CD14	RPL8
0	-0.407363	0.838	0.817	0	Inflammatory CD14	RPS13
0	-0.40946	0.834	0.813	0	Inflammatory CD14	RPL27
0	-0.420371	0.952	0.948	0	Inflammatory CD14	MT-ATP6
0	-0.437245	0.822	0.821	0	Inflammatory CD14	RPL15
0	-0.440151	0.787	0.788	0	Inflammatory CD14	RPL35
0	-0.461887	0.945	0.945	0	Inflammatory CD14	RPS11
[truncated: 22,410 more rows]
