# Supplementary material for: Identification of immune correlates of fatal outcomes in critically ill COVID-19 patients
Source: PLoS Pathog. 2021 Sep 16;17(9):e1009804. doi: 10.1371/journal.ppat.1009804 (PMC8445447; doi:10.1371/journal.ppat.1009804)
Supplement: S6 Table — (XLSX) [file ppat.1009804.s017.xlsx]

## Sheet: CD4_COVID
Differentially expressed genes in CD4+ T cells for survival vs. non-survival COVID ICU patients
gene	p_val	avg_logFC	pct.1	pct.2	p_val_adj
EEF1A1	0	0.739852	0.973	0.806	0
C17orf76-AS1	0	-0.442621	0.096	0.523	0
SUN2	0	-0.503616	0.275	0.701	0
UBB	0	-0.539904	0.28	0.715	0
FTH1	0	-0.606501	0.171	0.656	0
TPT1	0	-0.700147	0.996	0.993	0
XIST	0	-0.956388	0.062	0.625	0
CXCR4	2.54033e-305	-0.541437	0.324	0.718	5.08042e-301
B2M	9.63255e-289	-0.368678	0.999	0.999	1.92641e-284
EEF1D	6.33192e-270	-0.455059	0.5	0.833	1.26632e-265
TSC22D3	1.04055e-245	-0.651193	0.309	0.648	2.081e-241
PHF15	4.10818e-236	-0.263674	0.053	0.304	8.21596e-232
SNRPN	2.06153e-231	-0.257221	0.057	0.308	4.12285e-227
PPIB	7.06514e-224	-0.280988	0.103	0.386	1.41296e-219
PHF17	3.11205e-218	-0.268545	0.052	0.29	6.22379e-214
GAPDH	2.25004e-212	-0.39048	0.243	0.558	4.49985e-208
AES	4.20147e-212	-0.32004	0.214	0.531	8.40252e-208
RN7SL4P	1.27766e-190	0.337821	0.292	0.033	2.5552e-186
IL7R	3.12209e-190	-0.490882	0.883	0.941	6.24386e-186
PYURF	1.18699e-184	-0.209188	0.058	0.277	2.37386e-180
KLF2	2.30676e-182	-0.343204	0.334	0.648	4.6133e-178
FOSB	8.56549e-178	-0.590655	0.185	0.454	1.71301e-173
HLA-F	2.90006e-177	-0.350069	0.422	0.715	5.79983e-173
IGKC	2.51835e-173	-0.221863	0.035	0.219	5.03645e-169
TUBA1B	1.89717e-172	-0.238054	0.07	0.287	3.79414e-168
GIMAP7	2.08856e-171	-0.40105	0.423	0.695	4.17692e-167
SRSF10	3.05467e-169	0.289465	0.258	0.027	6.10903e-165
FOS	1.84822e-166	-0.717456	0.336	0.596	3.69626e-162
DDIT4	1.18768e-162	-0.289599	0.088	0.309	2.37524e-158
NOL7	3.55721e-159	-0.2186	0.075	0.285	7.11407e-155
TMEM259	1.66249e-155	-0.25563	0.16	0.41	3.32482e-151
EIF3C	5.78989e-155	0.283406	0.262	0.038	1.15792e-150
JADE2	1.75613e-154	0.259329	0.236	0.023	3.51208e-150
IGLC3	1.80359e-153	0.277061	0.209	0.009	3.60699e-149
BCAS4	6.98949e-153	0.308505	0.333	0.087	1.39783e-148
GAS5	1.63057e-148	-0.325366	0.472	0.74	3.26098e-144
GNB2L1	1.3082e-145	-0.269136	0.95	0.973	2.61627e-141
HLA-A	1.67427e-145	-0.28248	0.964	0.982	3.34838e-141
SPSB3	1.14873e-144	-0.156993	0.031	0.19	2.29734e-140
CCND3	1.95167e-144	-0.262293	0.273	0.542	3.90314e-140
SRSF2	8.46689e-143	-0.280266	0.287	0.559	1.69329e-138
ARL4C	1.2933e-140	-0.377673	0.565	0.792	2.58646e-136
SH3BP5	1.56274e-140	-0.241716	0.12	0.341	3.12532e-136
HMHA1	3.19005e-135	-0.269238	0.413	0.699	6.37977e-131
PNRC2	3.26593e-135	0.232489	0.222	0.027	6.53153e-131
TMSB4X	4.05039e-134	0.323808	0.933	0.86	8.10038e-130
VPS51	1.19414e-133	-0.195075	0.086	0.28	2.38816e-129
ATHL1	1.51928e-133	-0.427529	0.339	0.567	3.0384e-129
PIK3IP1	1.7828e-133	-0.319964	0.529	0.77	3.56543e-129
CD48	2.51032e-133	-0.275394	0.366	0.629	5.02039e-129
CSRNP1	8.29993e-133	-0.262931	0.076	0.262	1.6599e-128
DUSP1	1.14513e-132	-0.370035	0.195	0.426	2.29014e-128
C6orf48	1.29792e-132	-0.289754	0.346	0.609	2.59572e-128
NUCKS1	5.33209e-132	-0.294415	0.331	0.593	1.06636e-127
WDR6	8.50561e-129	-0.200828	0.099	0.298	1.70104e-124
IDS	1.95857e-127	0.223269	0.2	0.02	3.91695e-123
ZFP36L2	1.66116e-126	-0.346906	0.415	0.672	3.32215e-122
TMF1	4.45036e-126	-0.290691	0.224	0.461	8.90028e-122
JHDM1D	8.83851e-126	-0.170802	0.038	0.19	1.76761e-121
CD69	9.73559e-126	-0.360244	0.425	0.674	1.94702e-121
UBALD2	1.27005e-124	-0.301563	0.422	0.674	2.53997e-120
NUDT3	1.6289e-124	-0.239114	0.116	0.318	3.25764e-120
TSIX	7.35651e-124	-0.131166	0.014	0.134	1.47123e-119
NEAT1	3.14351e-123	-0.574198	0.369	0.572	6.2867e-119
PCBP1	6.87223e-123	-0.25202	0.275	0.518	1.37438e-118
CRIP1	6.20195e-120	0.230531	0.197	0.023	1.24033e-115
FKBP5	4.73432e-118	-0.31225	0.355	0.599	9.46817e-114
RASGRP2	7.35533e-118	-0.2485	0.301	0.549	1.47099e-113
DDX3X	9.02793e-118	-0.330076	0.478	0.703	1.8055e-113
SNHG6	8.52742e-117	-0.218674	0.232	0.469	1.7054e-112
PRMT2	2.43293e-115	-0.291804	0.336	0.57	4.86562e-111
IFNAR2	2.24883e-114	-0.182936	0.089	0.268	4.49744e-110
CD97	1.25622e-113	-0.227695	0.19	0.412	2.51231e-109
ANKRD12	6.36298e-113	-0.325286	0.534	0.757	1.27253e-108
RN7SL5P	1.47154e-112	0.195062	0.181	0.019	2.94293e-108
STUB1	3.75554e-112	-0.151486	0.048	0.197	7.5107e-108
LDHB	6.20935e-111	-0.287133	0.703	0.875	1.24181e-106
NSA2	1.32814e-110	-0.231419	0.256	0.487	2.65614e-106
PHB2	3.56355e-110	-0.206726	0.176	0.389	7.12674e-106
CD247	6.17263e-107	-0.255688	0.376	0.614	1.23446e-102
PSMA6	7.85207e-106	-0.140677	0.049	0.194	1.57034e-101
MYADM	3.15901e-105	-0.280575	0.083	0.247	6.31771e-101
MKLN1-AS1	3.94047e-104	-0.116846	0.019	0.132	7.88055e-100
TUBB4B	1.94398e-102	-0.181894	0.07	0.226	3.88777e-98
MALAT1	2.00788e-102	-0.379896	0.998	1	4.01556e-98
NAP1L1	7.38352e-102	-0.264365	0.623	0.827	1.47663e-97
PLP2	7.48848e-102	-0.131026	0.041	0.176	1.49762e-97
H3F3C	5.61342e-100	0.167758	0.17	0.021	1.12263e-95
TAF1D	1.21522e-99	-0.226576	0.232	0.446	2.43033e-95
RHOF	1.66183e-99	-0.115305	0.024	0.138	3.32349e-95
UQCR11	5.08206e-99	0.17352	0.177	0.025	1.01636e-94
MAZ	5.70391e-99	-0.115631	0.028	0.147	1.14073e-94
ETS1	1.06108e-98	-0.281426	0.954	0.968	2.12206e-94
SQSTM1	3.61933e-98	-0.162241	0.086	0.248	7.2383e-94
ARL6IP5	7.57249e-98	-0.261802	0.455	0.681	1.51442e-93
MKI67IP	1.49348e-97	-0.110741	0.022	0.132	2.9868e-93
MYL12A	8.03193e-97	-0.251653	0.531	0.752	1.6063e-92
PHB	2.43089e-96	-0.142509	0.058	0.201	4.86154e-92
ZMYM6NB	1.19368e-95	-0.108947	0.023	0.133	2.38724e-91
ODC1	2.20429e-94	-0.213518	0.133	0.308	4.40836e-90
LUC7L3	5.73068e-94	-0.298338	0.392	0.604	1.14608e-89
SRSF5	6.9146e-94	-0.244834	0.664	0.861	1.38285e-89
JUN	1.8549e-93	-0.494872	0.359	0.549	3.70962e-89
HBB	2.85383e-93	-0.332161	0.069	0.212	5.70737e-89
SMAP2	5.00522e-93	-0.241461	0.431	0.654	1.00099e-88
ADCY7	9.489e-93	-0.146747	0.069	0.216	1.89771e-88
NAP1L4	3.79562e-92	-0.216154	0.309	0.53	7.59087e-88
TXNIP	4.35285e-92	-0.309536	0.941	0.949	8.70526e-88
RN7SL128P	1.03185e-91	0.164271	0.162	0.022	2.06359e-87
GRAP	8.97355e-91	-0.104031	0.021	0.125	1.79462e-86
CD53	2.78959e-90	-0.209843	0.358	0.584	5.5789e-86
ACAA1	4.00505e-89	-0.136026	0.06	0.197	8.00969e-85
SLA	2.08531e-88	-0.206951	0.235	0.439	4.1704e-84
COX20	2.52554e-88	-0.11381	0.035	0.151	5.05082e-84
FYB	4.44147e-88	-0.265989	0.734	0.874	8.88249e-84
ARID4B	4.52398e-88	-0.249121	0.389	0.603	9.04751e-84
CDC42SE1	5.19471e-88	-0.1981	0.307	0.524	1.03889e-83
SLC25A6	7.28408e-88	-0.23417	0.491	0.71	1.45674e-83
AKAP9	1.1168e-86	-0.269456	0.34	0.556	2.23348e-82
TAGAP	3.73869e-86	-0.226469	0.261	0.465	7.47701e-82
YPEL5	8.31653e-86	-0.296177	0.211	0.391	1.66322e-81
HNRNPDL	1.42952e-85	-0.213757	0.597	0.816	2.85889e-81
EIF4A2	2.98274e-85	-0.236478	0.595	0.798	5.96518e-81
SESN3	8.251e-85	-0.284998	0.309	0.512	1.65012e-80
HMGN1	7.80662e-84	-0.189378	0.289	0.497	1.56125e-79
IER2	8.78008e-84	-0.216143	0.162	0.338	1.75593e-79
DIP2A	2.96624e-83	-0.20894	0.184	0.367	5.93219e-79
VMP1	3.15606e-83	-0.16923	0.102	0.255	6.3118e-79
IL6ST	4.6435e-83	-0.329027	0.522	0.707	9.28653e-79
NHP2	9.39367e-83	-0.126943	0.055	0.181	1.87864e-78
CIRBP	3.69853e-82	-0.203088	0.399	0.626	7.39669e-78
NUMA1	3.75272e-82	-0.211953	0.248	0.445	7.50506e-78
NBEAL1	4.04979e-81	0.19953	0.249	0.087	8.09917e-77
SLC25A5	4.36814e-81	-0.168983	0.159	0.333	8.73585e-77
DDX3Y	4.63009e-81	0.186223	0.332	0.138	9.25973e-77
COX7C	6.73648e-81	-0.202681	0.449	0.664	1.34723e-76
PPIG	7.48135e-81	-0.210905	0.28	0.48	1.4962e-76
SRGN	2.04005e-80	-0.331643	0.296	0.479	4.07989e-76
GOLGA4	2.104e-80	-0.23587	0.228	0.416	4.20779e-76
CHMP1B	5.19406e-80	-0.144766	0.09	0.236	1.03876e-75
PAIP2	6.32967e-80	-0.156065	0.152	0.324	1.26587e-75
ARHGDIA	1.26577e-79	-0.126404	0.073	0.21	2.5314e-75
EIF4A1	1.95682e-79	-0.149792	0.098	0.248	3.91344e-75
PTMA	1.73915e-78	0.264209	0.742	0.655	3.47814e-74
SLC7A6OS	1.82459e-78	-0.118588	0.039	0.149	3.64899e-74
EIF3E	2.59183e-78	-0.198075	0.352	0.56	5.18341e-74
SON	3.43722e-78	-0.257079	0.64	0.814	6.87409e-74
SNRPD2	4.47169e-78	-0.195977	0.448	0.669	8.94293e-74
LSP1	5.02521e-78	0.13735	0.137	0.017	1.00499e-73
LARP7	6.76812e-78	-0.158373	0.112	0.264	1.35356e-73
C20orf24	1.24152e-77	-0.0941154	0.024	0.12	2.48291e-73
PGK1	1.7652e-77	-0.184521	0.336	0.545	3.53023e-73
ENSA	7.03944e-77	-0.179557	0.229	0.417	1.40782e-72
RBM38	1.49807e-76	-0.15067	0.097	0.24	2.99598e-72
HLA-B	1.58385e-76	-0.170349	0.999	0.997	3.16753e-72
PAXBP1	2.7183e-76	-0.179091	0.154	0.319	5.43632e-72
KDM5D	6.01814e-76	0.158805	0.168	0.036	1.20357e-71
CYTH1	2.28709e-75	-0.220131	0.543	0.742	4.57394e-71
CD37	1.89981e-74	-0.144969	0.129	0.286	3.79942e-70
TMEM66	2.48604e-74	-0.219719	0.727	0.869	4.97183e-70
JADE1	7.05899e-74	0.132108	0.12	0.011	1.41173e-69
CYTIP	1.01755e-73	-0.18079	0.294	0.49	2.03499e-69
FDPS	1.84228e-73	-0.113034	0.051	0.167	3.68438e-69
LEPROTL1	2.10222e-73	-0.173927	0.241	0.428	4.20424e-69
SDR39U1	2.63267e-73	-0.0968637	0.03	0.127	5.26508e-69
TUBA1A	4.6628e-73	-0.260805	0.21	0.377	9.32513e-69
RGCC	7.18004e-73	-0.17209	0.108	0.252	1.43594e-68
C12orf57	9.31073e-73	-0.176033	0.228	0.408	1.86205e-68
PPP1R15A	1.6294e-72	-0.281407	0.24	0.408	3.25863e-68
PIM2	3.35221e-72	-0.185405	0.28	0.472	6.70408e-68
PASK	5.61395e-72	-0.151052	0.084	0.215	1.12273e-67
BTG1	6.72427e-72	-0.22355	0.746	0.874	1.34479e-67
IVNS1ABP	7.48803e-72	-0.164349	0.172	0.34	1.49753e-67
FUS	1.5808e-71	-0.201734	0.481	0.697	3.16145e-67
ANXA1	7.92871e-71	-0.364636	0.347	0.526	1.58566e-66
NCK2	2.93783e-70	-0.166263	0.259	0.448	5.87537e-66
H3F3B	3.13301e-70	-0.273502	0.835	0.893	6.26571e-66
MRPL9	3.60095e-70	-0.115791	0.064	0.185	7.20153e-66
TNRC6C-AS1	3.84109e-70	-0.137548	0.099	0.237	7.68179e-66
PDCD4	4.08583e-70	-0.198027	0.336	0.531	8.17126e-66
DCAF8	6.72758e-70	0.135681	0.137	0.023	1.34545e-65
SMARCA5	8.21492e-70	-0.209346	0.42	0.618	1.6429e-65
TMEM243	1.1358e-69	-0.116149	0.066	0.188	2.27149e-65
SOD1	2.37576e-69	-0.219436	0.491	0.675	4.75128e-65
PTPN1	2.43315e-69	-0.158656	0.213	0.391	4.86606e-65
RSRC2	3.18363e-69	-0.179522	0.264	0.45	6.36693e-65
GPR171	4.14558e-69	-0.142879	0.099	0.236	8.29074e-65
GIMAP4	9.25784e-69	-0.249588	0.438	0.62	1.85148e-64
KDM5A	2.91492e-68	-0.205525	0.315	0.508	5.82955e-64
ICAM2	1.96749e-67	-0.104257	0.049	0.157	3.93478e-63
TOB1	3.22424e-67	-0.179687	0.17	0.329	6.44816e-63
ACTG1	5.61352e-67	-0.256615	0.637	0.822	1.12265e-62
EEF2	7.97948e-67	-0.187526	0.944	0.965	1.59582e-62
MCL1	8.86498e-67	-0.234893	0.552	0.725	1.77291e-62
ARPC1B	2.08749e-66	-0.193636	0.37	0.563	4.17477e-62
USP16	2.33005e-66	-0.166218	0.197	0.364	4.65987e-62
OST4	2.41713e-66	-0.137511	0.139	0.29	4.83402e-62
RANGRF	2.91748e-66	-0.0896104	0.027	0.116	5.83468e-62
ZNF276	3.65391e-66	-0.167289	0.184	0.345	7.30746e-62
EIF3A	8.46459e-66	-0.209134	0.479	0.667	1.69283e-61
MAN2A2	1.75608e-65	-0.12165	0.063	0.177	3.51198e-61
IQGAP2	2.15844e-65	-0.184063	0.297	0.484	4.31667e-61
SERINC1	6.88046e-65	-0.158551	0.258	0.44	1.37602e-60
SRSF7	8.50476e-65	-0.190406	0.368	0.559	1.70087e-60
PABPC4	2.06124e-64	-0.169251	0.278	0.459	4.12228e-60
TRADD	2.16787e-64	-0.146376	0.139	0.286	4.33553e-60
TTC14	5.47639e-64	-0.1662	0.174	0.33	1.09522e-59
IER5	1.16001e-63	-0.156927	0.081	0.202	2.31991e-59
EHBP1L1	1.35409e-63	-0.153308	0.152	0.303	2.70805e-59
PCBP2	3.07837e-63	-0.159637	0.311	0.496	6.15644e-59
OXNAD1	3.55749e-63	-0.177302	0.295	0.476	7.11463e-59
TNFRSF25	3.74102e-63	-0.130199	0.115	0.252	7.48166e-59
BRWD1	4.21391e-63	-0.210292	0.221	0.381	8.4274e-59
ZAP70	1.59421e-62	-0.15338	0.249	0.424	3.18826e-58
CD55	6.01932e-62	-0.166627	0.213	0.376	1.2038e-57
EIF3CL	7.52457e-62	0.109729	0.112	0.015	1.50484e-57
ARRDC2	1.65305e-61	-0.12673	0.096	0.223	3.30594e-57
ARGLU1	2.32458e-61	-0.169864	0.448	0.651	4.64892e-57
C10orf137	2.52058e-61	-0.0835483	0.022	0.101	5.04091e-57
TMBIM4	2.779e-61	0.108214	0.112	0.015	5.55773e-57
SNHG16	9.12993e-61	-0.103411	0.06	0.168	1.82589e-56
SLC44A2	1.84062e-60	-0.150733	0.23	0.398	3.68107e-56
KRR1	2.7746e-60	-0.12676	0.108	0.239	5.54893e-56
ZNF331	3.40137e-60	-0.214572	0.126	0.26	6.8024e-56
AKAP13	3.49066e-60	-0.210878	0.515	0.691	6.98096e-56
CALM3	1.08518e-59	-0.150978	0.248	0.42	2.17024e-55
ZFP36	1.31153e-59	-0.196679	0.162	0.304	2.62293e-55
CWF19L2	1.33716e-59	-0.161972	0.125	0.258	2.67418e-55
ERH	1.6881e-59	-0.125631	0.121	0.256	3.37602e-55
ZFAS1	2.55652e-59	-0.152476	0.3	0.481	5.11279e-55
ARID4A	2.81747e-59	-0.171857	0.181	0.332	5.63465e-55
MRFAP1	3.47574e-59	-0.137777	0.184	0.339	6.95113e-55
MAN1A2	4.38873e-59	-0.190615	0.352	0.527	8.77702e-55
CCT4	5.20007e-59	-0.133234	0.173	0.326	1.03996e-54
FBXO32	1.718e-58	-0.149165	0.117	0.249	3.43583e-54
SLC25A3	2.20802e-58	-0.160045	0.355	0.538	4.41583e-54
C11orf31	4.13498e-58	-0.120133	0.1	0.225	8.26954e-54
TMC6	4.39461e-58	-0.154402	0.287	0.462	8.78878e-54
GLTSCR2	5.6244e-58	-0.187783	0.832	0.914	1.12482e-53
GADD45B	6.25214e-58	-0.203849	0.186	0.334	1.25036e-53
C1QBP	8.57955e-58	-0.124291	0.141	0.282	1.71582e-53
TRMT112	9.21968e-58	-0.130458	0.16	0.306	1.84384e-53
PNP	1.05759e-57	-0.0939311	0.045	0.14	2.11507e-53
IGHG3	1.15473e-57	-0.141848	0.063	0.169	2.30935e-53
LITAF	1.4394e-57	-0.143968	0.263	0.435	2.87866e-53
AIM1	2.51782e-57	-0.165358	0.193	0.344	5.03539e-53
PPP1CB	4.03736e-57	-0.15114	0.235	0.4	8.07432e-53
CPT1A	4.93481e-57	-0.135424	0.15	0.291	9.86912e-53
SMARCE1	8.12691e-57	-0.127742	0.142	0.281	1.6253e-52
FAM46C	1.3166e-56	-0.185953	0.107	0.23	2.63307e-52
PSMB4	1.33618e-56	-0.14081	0.242	0.408	2.67223e-52
TTC3	1.80188e-56	-0.214566	0.449	0.616	3.60357e-52
JMJD1C	2.08935e-56	-0.191771	0.308	0.475	4.1785e-52
COX4I1	3.28724e-56	-0.16814	0.576	0.759	6.57414e-52
HNRNPAB	8.09463e-56	-0.133516	0.171	0.317	1.61885e-51
INO80E	8.17089e-56	-0.0814612	0.033	0.117	1.6341e-51
NAPRT1	1.03211e-55	-0.0840071	0.031	0.113	2.06411e-51
NEMF	1.04467e-55	-0.173056	0.221	0.373	2.08923e-51
SCAPER	1.27376e-55	-0.137285	0.09	0.206	2.54739e-51
SEMA4D	1.31256e-55	-0.160883	0.393	0.578	2.625e-51
GRASP	1.96114e-55	-0.080874	0.026	0.104	3.92208e-51
IFNGR2	2.47118e-55	-0.087048	0.036	0.122	4.94212e-51
PPP1R35	3.82745e-55	-0.0797078	0.027	0.105	7.65451e-51
NPIPA7	4.17155e-55	0.098314	0.105	0.015	8.34269e-51
SLTM	5.0002e-55	-0.172704	0.343	0.516	9.9999e-51
RHOH	5.48639e-55	-0.155753	0.25	0.412	1.09722e-50
UBAC2	5.78359e-55	-0.118036	0.099	0.219	1.15666e-50
HBP1	6.31867e-55	-0.105379	0.087	0.203	1.26367e-50
USP47	1.01491e-54	-0.151483	0.242	0.404	2.02971e-50
EPC1	1.01567e-54	-0.158276	0.286	0.452	2.03124e-50
NOP58	1.09766e-54	-0.15568	0.291	0.46	2.19522e-50
POLR2C	1.39762e-54	-0.106469	0.087	0.202	2.79509e-50
PABPN1	1.60414e-54	-0.101585	0.071	0.178	3.20813e-50
BTBD6	2.67378e-54	-0.100112	0.06	0.16	5.34729e-50
PTGER2	3.66784e-54	-0.15209	0.129	0.257	7.33531e-50
TAGLN2	3.82928e-54	-0.155944	0.183	0.327	7.65818e-50
CEP290	5.05018e-54	-0.151463	0.104	0.224	1.00999e-49
SHFM1	1.0066e-53	-0.114233	0.097	0.213	2.0131e-49
ROCK1	2.73425e-53	-0.156774	0.327	0.499	5.46823e-49
SIK1	2.95146e-53	-0.112835	0.057	0.155	5.90263e-49
PSMA1	3.00532e-53	0.101077	0.109	0.019	6.01034e-49
MLLT6	3.02849e-53	-0.161293	0.382	0.559	6.05667e-49
LSM1	9.80002e-53	-0.0774357	0.033	0.114	1.95991e-48
PSMD7	1.05516e-52	-0.125225	0.15	0.284	2.11022e-48
AP1G2	1.14558e-52	-0.118512	0.086	0.196	2.29104e-48
CPNE1	1.28981e-52	-0.125697	0.154	0.29	2.57949e-48
ATRX	1.47541e-52	-0.204841	0.451	0.618	2.95067e-48
EIF5	1.50259e-52	-0.168405	0.382	0.558	3.00504e-48
TSPAN14	1.6203e-52	-0.151487	0.308	0.479	3.24045e-48
CBFB	1.98047e-52	-0.1176	0.122	0.248	3.96074e-48
ID2	4.33355e-52	-0.155913	0.167	0.305	8.66666e-48
PTGER4	4.3866e-52	-0.190961	0.196	0.336	8.77276e-48
H1FX	5.92855e-52	-0.140886	0.182	0.325	1.18565e-47
DUSP2	1.0647e-51	-0.160461	0.089	0.198	2.12929e-47
TOMM20	1.11608e-51	-0.140053	0.263	0.423	2.23204e-47
NAA15	1.43177e-51	-0.142261	0.185	0.327	2.86339e-47
RBM5	1.79986e-51	-0.161077	0.258	0.41	3.59955e-47
GIMAP5	2.10953e-51	-0.163181	0.292	0.452	4.21884e-47
CERS6	3.25084e-51	-0.11196	0.07	0.171	6.50136e-47
PDE4B	3.43646e-51	-0.156062	0.179	0.318	6.87257e-47
TMEM2	4.32398e-51	-0.144325	0.142	0.271	8.64753e-47
HNRNPU-AS1	5.3674e-51	-0.0873492	0.031	0.109	1.07343e-46
CA5B	5.41289e-51	-0.109917	0.098	0.213	1.08252e-46
PDIA6	7.11843e-51	-0.146502	0.178	0.315	1.42362e-46
PNN	1.10409e-50	-0.189138	0.375	0.542	2.20807e-46
FAM107B	1.12401e-50	-0.163235	0.446	0.621	2.24792e-46
SLC4A7	1.26783e-50	-0.119102	0.115	0.236	2.53553e-46
UPP1	1.29675e-50	-0.124558	0.179	0.32	2.59338e-46
RBM39	1.45519e-50	-0.165491	0.618	0.787	2.91024e-46
NMRK1	1.59003e-50	-0.110662	0.115	0.236	3.17991e-46
ANKRD26	1.8071e-50	-0.122586	0.062	0.159	3.61401e-46
SRSF1	1.9954e-50	-0.118329	0.109	0.227	3.99061e-46
C16orf80	2.46047e-50	-0.104821	0.055	0.147	4.9207e-46
TAP2	2.74144e-50	0.103354	0.118	0.026	5.48261e-46
TAPSAR1	3.52499e-50	-0.115728	0.127	0.251	7.04964e-46
USP9Y	7.72215e-50	0.129849	0.166	0.058	1.54435e-45
CENPC	7.87906e-50	-0.116569	0.097	0.209	1.57573e-45
GBP2	9.73227e-50	-0.164624	0.329	0.498	1.94636e-45
ENGASE	1.11335e-49	-0.0928566	0.047	0.134	2.22659e-45
TMEM245	1.36736e-49	-0.135184	0.162	0.295	2.73459e-45
DBNL	1.4121e-49	-0.13741	0.213	0.36	2.82406e-45
CREM	1.53743e-49	-0.108823	0.051	0.141	3.07472e-45
UBXN4	1.78308e-49	-0.16599	0.358	0.523	3.56599e-45
LMNA	2.15354e-49	-0.13291	0.039	0.121	4.30687e-45
IL24	2.30406e-49	0.101838	0.109	0.022	4.60788e-45
TXK	2.43298e-49	-0.123766	0.145	0.274	4.86572e-45
GGNBP2	2.44678e-49	-0.148854	0.28	0.439	4.89331e-45
UQCRB	2.59188e-49	-0.143883	0.375	0.545	5.18351e-45
PGS1	2.88343e-49	-0.0848618	0.043	0.127	5.76657e-45
PPP1CA	3.08695e-49	-0.115015	0.131	0.254	6.17359e-45
AKT1	3.34906e-49	-0.0973112	0.071	0.171	6.69778e-45
EIF3M	5.36665e-49	-0.123054	0.187	0.326	1.07328e-44
RSF1	9.18027e-49	-0.154498	0.286	0.445	1.83596e-44
SYF2	1.42603e-48	-0.125156	0.192	0.333	2.85192e-44
UBA3	1.60149e-48	-0.104288	0.105	0.219	3.20282e-44
PREX1	2.85966e-48	-0.125765	0.209	0.356	5.71904e-44
PHF14	3.08974e-48	-0.137047	0.154	0.282	6.17917e-44
ITGB2	3.51932e-48	-0.169964	0.456	0.626	7.03828e-44
CLK1	3.77772e-48	-0.142534	0.277	0.433	7.55506e-44
2020-09-01	5.43005e-48	-0.116634	0.135	0.258	1.08596e-43
LGALS8	7.64083e-48	-0.133954	0.218	0.364	1.52809e-43
TERF2IP	8.72493e-48	-0.129373	0.273	0.433	1.7449e-43
KXD1	9.51281e-48	-0.0768888	0.037	0.115	1.90247e-43
SNRPB	1.17725e-47	-0.100517	0.114	0.232	2.35439e-43
PNISR	1.29671e-47	-0.206499	0.56	0.716	2.5933e-43
PPIL4	1.41673e-47	-0.104925	0.074	0.174	2.83331e-43
GTF2B	1.42693e-47	-0.0873554	0.06	0.153	2.85371e-43
NT5C2	1.94412e-47	-0.0936436	0.057	0.147	3.88804e-43
ANAPC16	2.41568e-47	-0.133982	0.261	0.413	4.83112e-43
SGK1	2.65406e-47	-0.130189	0.076	0.174	5.30786e-43
SAT1	2.79843e-47	-0.143819	0.185	0.319	5.59659e-43
PFKL	3.07706e-47	-0.105676	0.13	0.254	6.15382e-43
SNHG12	3.62464e-47	-0.10722	0.089	0.194	7.24891e-43
TSR3	4.23641e-47	-0.088755	0.059	0.151	8.4724e-43
EIF1AX	4.27196e-47	-0.109778	0.111	0.225	8.5435e-43
PIM3	4.47692e-47	-0.0989464	0.076	0.175	8.95339e-43
GUK1	5.19682e-47	-0.132451	0.273	0.427	1.03931e-42
UTRN	6.34376e-47	-0.215853	0.424	0.579	1.26869e-42
ENTPD6	6.42648e-47	-0.0840343	0.046	0.13	1.28523e-42
MFSD12	6.55259e-47	-0.0788724	0.039	0.118	1.31045e-42
RYBP	7.54281e-47	-0.138917	0.159	0.286	1.50849e-42
OAZ1	1.1152e-46	-0.139488	0.456	0.635	2.2303e-42
MYB	1.29741e-46	-0.125795	0.04	0.119	2.5947e-42
FBL	1.36254e-46	-0.140229	0.296	0.451	2.72495e-42
CCT8	2.29545e-46	-0.136206	0.226	0.368	4.59067e-42
SMC1A	2.36542e-46	-0.14646	0.212	0.352	4.7306e-42
CBX7	2.79056e-46	-0.102607	0.092	0.198	5.58085e-42
ETFB	3.74425e-46	-0.0999796	0.085	0.188	7.48812e-42
EVI2A	4.13984e-46	-0.108939	0.122	0.239	8.27927e-42
CIR1	5.82088e-46	-0.114149	0.126	0.244	1.16412e-41
IFITM3	7.57335e-46	0.121028	0.143	0.047	1.51459e-41
PWP2	7.86433e-46	-0.0878306	0.058	0.147	1.57279e-41
PRELID1	8.977e-46	-0.0762973	0.042	0.122	1.79531e-41
MED28	1.12418e-45	-0.0977963	0.078	0.177	2.24825e-41
NFATC3	1.39292e-45	-0.110093	0.112	0.224	2.78571e-41
TPR	1.80453e-45	-0.194268	0.496	0.651	3.60889e-41
ZNF101	2.37455e-45	-0.139622	0.24	0.382	4.74885e-41
CCDC88B	2.39865e-45	-0.128138	0.17	0.299	4.79707e-41
NDUFB8	2.51229e-45	0.09884	0.114	0.028	5.02433e-41
IDI1	2.74587e-45	-0.120261	0.132	0.25	5.49146e-41
NECAP2	3.3148e-45	-0.118069	0.178	0.31	6.62927e-41
TMED9	3.50025e-45	-0.116608	0.149	0.272	7.00014e-41
EIF3H	3.51958e-45	-0.144332	0.453	0.62	7.0388e-41
APBA2	4.15054e-45	-0.114395	0.118	0.232	8.30067e-41
UGCG	6.72727e-45	-0.151361	0.196	0.326	1.34539e-40
PSME1	8.41265e-45	-0.137022	0.43	0.599	1.68245e-40
SERINC5	9.54922e-45	-0.0946312	0.06	0.149	1.90975e-40
BOD1L1	1.1707e-44	-0.190176	0.342	0.488	2.34128e-40
RNF149	1.55518e-44	-0.115765	0.175	0.307	3.1102e-40
PPP1R12A	1.86659e-44	-0.144548	0.319	0.474	3.73299e-40
HMGB2	1.98735e-44	-0.131612	0.227	0.368	3.97451e-40
EID1	2.41934e-44	-0.132329	0.276	0.427	4.83844e-40
RNF19A	2.77354e-44	-0.149885	0.146	0.264	5.54681e-40
RABL6	2.79017e-44	-0.103077	0.128	0.245	5.58006e-40
USP20	2.99485e-44	-0.100191	0.101	0.209	5.98941e-40
IFIT3	3.80604e-44	0.190081	0.137	0.045	7.6117e-40
CACNA1I	4.17179e-44	-0.0823075	0.042	0.12	8.34317e-40
RNF44	4.52856e-44	-0.108237	0.13	0.245	9.05666e-40
TCIRG1	4.85336e-44	-0.0919865	0.084	0.184	9.70624e-40
RTN4	6.32667e-44	-0.116929	0.206	0.344	1.26527e-39
NOC2L	1.03378e-43	-0.082375	0.054	0.139	2.06747e-39
SIAH2	1.19306e-43	-0.0713676	0.031	0.101	2.386e-39
TMX4	1.1968e-43	-0.123666	0.198	0.333	2.39349e-39
CHD1	1.30535e-43	-0.162533	0.318	0.464	2.61057e-39
KBTBD2	1.47021e-43	-0.113029	0.151	0.274	2.94027e-39
BUD31	1.67472e-43	-0.0811214	0.059	0.146	3.34928e-39
BDP1	1.85607e-43	-0.165156	0.278	0.42	3.71195e-39
BIRC3	2.24702e-43	-0.190186	0.373	0.527	4.49381e-39
NPDC1	2.34225e-43	-0.0862766	0.047	0.127	4.68427e-39
PTOV1	2.97042e-43	-0.0936824	0.072	0.165	5.94055e-39
ZNF32	3.4456e-43	-0.0703534	0.035	0.108	6.89086e-39
SEC31B	4.08113e-43	-0.0970532	0.086	0.186	8.16186e-39
EXOC7	4.12144e-43	-0.0966221	0.098	0.202	8.24246e-39
NACA	4.49276e-43	-0.153021	0.671	0.826	8.98508e-39
ARID5B	5.61845e-43	-0.168724	0.338	0.495	1.12363e-38
MCM3AP	7.99914e-43	-0.107244	0.122	0.234	1.59975e-38
JTB	8.23296e-43	-0.109184	0.246	0.393	1.64651e-38
DNAJC9	9.62973e-43	-0.0827446	0.055	0.139	1.92585e-38
UBE3A	1.1204e-42	-0.121823	0.192	0.324	2.24068e-38
HEXDC	1.23281e-42	-0.0974227	0.084	0.182	2.46549e-38
CERS2	1.23738e-42	-0.0746056	0.054	0.138	2.47464e-38
MINOS1	1.36671e-42	-0.0910876	0.081	0.177	2.73328e-38
ZNF292	1.87078e-42	-0.163866	0.288	0.428	3.74137e-38
TMC8	1.87368e-42	-0.14934	0.409	0.572	3.74716e-38
SNORD89	1.98766e-42	0.0892246	0.105	0.026	3.97513e-38
RGS1	2.14637e-42	-0.220085	0.072	0.163	4.29252e-38
SNHG1	2.32974e-42	-0.120929	0.173	0.297	4.65925e-38
C21orf59	3.24798e-42	-0.0865022	0.056	0.14	6.49563e-38
ISG20	4.58571e-42	-0.12038	0.268	0.416	9.17096e-38
CEBPZ	6.57123e-42	-0.119809	0.166	0.288	1.31418e-37
PARK7	7.14845e-42	-0.11366	0.209	0.343	1.42962e-37
NDUFS7	8.7467e-42	-0.0747609	0.044	0.12	1.74925e-37
GIMAP1	1.01756e-41	-0.128001	0.256	0.4	2.03502e-37
DPP7	1.08767e-41	-0.097516	0.133	0.248	2.17524e-37
METAP2	1.29621e-41	-0.115319	0.182	0.308	2.59228e-37
THOC2	1.31522e-41	-0.139784	0.284	0.428	2.63031e-37
KLC1	1.41255e-41	-0.0886305	0.075	0.167	2.82496e-37
MYL6	1.68577e-41	-0.172378	0.621	0.77	3.37136e-37
ENO2	2.11901e-41	-0.0929909	0.072	0.162	4.2378e-37
ADPRM	2.45589e-41	-0.0848463	0.06	0.145	4.91154e-37
DHX36	2.55815e-41	-0.134953	0.242	0.378	5.11605e-37
LRCH4	3.03491e-41	-0.097769	0.118	0.227	6.06952e-37
TOP1	3.66623e-41	-0.115855	0.178	0.303	7.33209e-37
FAM21B	4.08093e-41	0.0878989	0.106	0.027	8.16145e-37
CYCS	4.24471e-41	-0.108485	0.119	0.227	8.489e-37
ZNF638	4.52211e-41	-0.143052	0.304	0.452	9.04377e-37
EIF3G	4.57587e-41	-0.119907	0.3	0.448	9.15127e-37
YIPF4	5.65082e-41	-0.0998008	0.088	0.184	1.13011e-36
SH3BGRL3	5.73554e-41	-0.121912	0.213	0.345	1.14705e-36
SLC12A7	6.01451e-41	-0.0743938	0.043	0.119	1.20284e-36
HNRNPR	6.18215e-41	-0.139169	0.396	0.555	1.23637e-36
NBPF16	6.5843e-41	0.0889672	0.108	0.029	1.31679e-36
USP22	6.9203e-41	-0.0947147	0.122	0.233	1.38399e-36
TUFM	7.0718e-41	-0.107445	0.165	0.286	1.41429e-36
ARPC4	7.80656e-41	-0.100173	0.136	0.249	1.56123e-36
P4HB	7.93228e-41	-0.108345	0.17	0.292	1.58638e-36
FAM53C	9.76649e-41	-0.0774549	0.045	0.121	1.9532e-36
PPM1B	1.27792e-40	-0.0957279	0.095	0.193	2.55571e-36
APH1A	1.45274e-40	-0.0806691	0.073	0.163	2.90533e-36
FAM21A	1.77227e-40	0.103059	0.125	0.04	3.54437e-36
CERKL	1.90821e-40	0.0915749	0.102	0.025	3.81623e-36
OFD1	2.15911e-40	-0.122328	0.208	0.338	4.31801e-36
NDUFV1	2.28586e-40	-0.104302	0.134	0.245	4.57149e-36
LPIN2	2.69329e-40	-0.148616	0.296	0.439	5.38631e-36
ITGA6	3.12923e-40	-0.177318	0.423	0.578	6.25815e-36
KHNYN	3.13229e-40	-0.0938856	0.086	0.181	6.26427e-36
FKBP3	3.30413e-40	-0.10015	0.119	0.225	6.60793e-36
CCNI	3.37549e-40	-0.14982	0.562	0.721	6.75063e-36
CDKN1B	3.55048e-40	-0.121303	0.249	0.39	7.1006e-36
QARS	3.64052e-40	-0.105385	0.149	0.265	7.28068e-36
RHOA	3.70602e-40	-0.124579	0.425	0.592	7.41167e-36
TSPAN17	4.64977e-40	-0.0837035	0.056	0.137	9.29907e-36
NEDD8	7.04483e-40	-0.112376	0.219	0.35	1.4089e-35
CNN2	8.17033e-40	-0.121522	0.243	0.38	1.63398e-35
USF2	9.82244e-40	-0.106461	0.194	0.322	1.96439e-35
PHIP	1.0866e-39	-0.159631	0.309	0.449	2.17309e-35
HGS	1.13563e-39	-0.066684	0.036	0.105	2.27115e-35
CD27	1.13948e-39	-0.0920425	0.102	0.203	2.27885e-35
SMDT1	1.57014e-39	-0.0967871	0.179	0.306	3.14011e-35
PPWD1	1.61403e-39	-0.102201	0.119	0.225	3.22789e-35
COX6C	1.7681e-39	-0.115632	0.305	0.454	3.53602e-35
SLC38A2	2.06941e-39	-0.145913	0.23	0.358	4.13862e-35
GLIPR1	2.10473e-39	-0.116052	0.108	0.207	4.20926e-35
RFXANK	2.25877e-39	-0.0739764	0.05	0.127	4.51731e-35
HECA	2.3876e-39	-0.126384	0.358	0.508	4.77496e-35
IWS1	2.45768e-39	-0.111494	0.134	0.244	4.91511e-35
ICOS	2.62543e-39	-0.130378	0.139	0.248	5.25059e-35
AQP3	2.75721e-39	-0.116269	0.176	0.297	5.51414e-35
PRDX5	2.76421e-39	-0.0982526	0.134	0.245	5.52814e-35
NR4A2	2.79198e-39	-0.148527	0.087	0.18	5.58369e-35
NASP	3.21953e-39	-0.119723	0.177	0.298	6.43874e-35
TAF7	3.7967e-39	-0.129201	0.303	0.444	7.59301e-35
DUT	4.23491e-39	-0.109343	0.173	0.292	8.4694e-35
SRP19	5.16095e-39	-0.0767246	0.061	0.143	1.03214e-34
ATG16L2	5.24393e-39	-0.0813206	0.064	0.148	1.04873e-34
AHSA2	5.31542e-39	-0.122781	0.174	0.291	1.06303e-34
CMTM3	5.72122e-39	-0.0933912	0.109	0.211	1.14419e-34
EPB41L4A-AS1	6.28706e-39	-0.0945895	0.113	0.216	1.25735e-34
KRT10	6.52836e-39	-0.0951375	0.102	0.2	1.30561e-34
ACTR1B	7.28468e-39	-0.0985002	0.106	0.206	1.45686e-34
CCR7	7.40306e-39	-0.15792	0.434	0.591	1.48054e-34
BPTF	7.98722e-39	-0.164036	0.447	0.6	1.59736e-34
FAM104A	1.0214e-38	-0.0792511	0.05	0.126	2.04271e-34
ADSL	1.21914e-38	-0.0979477	0.129	0.238	2.43815e-34
D2HGDH	1.24645e-38	-0.0712862	0.035	0.101	2.49278e-34
PIK3R1	1.33507e-38	-0.162426	0.469	0.618	2.67e-34
RASSF1	1.41833e-38	-0.0717815	0.048	0.124	2.83651e-34
PRPS1	1.6919e-38	-0.0939196	0.1	0.198	3.38363e-34
TNFAIP3	1.87536e-38	-0.365905	0.337	0.449	3.75054e-34
CTLA4	2.00508e-38	-0.105297	0.057	0.136	4.00997e-34
SEC62	2.72154e-38	-0.125678	0.328	0.48	5.44282e-34
CDC14A	2.7371e-38	-0.114828	0.172	0.29	5.47393e-34
SOCS2	2.96111e-38	-0.104077	0.077	0.164	5.92193e-34
CASP8AP2	2.98083e-38	-0.150416	0.233	0.36	5.96137e-34
C19orf60	3.1693e-38	-0.100256	0.143	0.255	6.33828e-34
RASA1	3.60978e-38	-0.0999329	0.096	0.191	7.21921e-34
KIF5B	4.40658e-38	-0.136928	0.306	0.447	8.81271e-34
ACO2	4.8536e-38	-0.0725818	0.046	0.12	9.70671e-34
GPRIN3	5.45641e-38	-0.148348	0.373	0.521	1.09123e-33
CYHR1	6.14787e-38	-0.0750069	0.049	0.124	1.22951e-33
ANP32B	6.57802e-38	-0.138115	0.459	0.614	1.31554e-33
PER1	9.92363e-38	-0.0781173	0.053	0.129	1.98463e-33
CBX6	1.01616e-37	-0.0946331	0.1	0.196	2.03222e-33
ITGB2-AS1	1.09326e-37	-0.0937218	0.08	0.169	2.18642e-33
RAN	1.19518e-37	-0.112932	0.259	0.394	2.39025e-33
EIF2S3	1.23463e-37	-0.118921	0.281	0.418	2.46914e-33
EMC10	1.25507e-37	-0.0833226	0.07	0.154	2.51002e-33
PSIP1	1.40065e-37	-0.138981	0.402	0.552	2.80116e-33
UBE2I	1.428e-37	-0.0989377	0.145	0.257	2.85586e-33
FBXW5	1.45738e-37	-0.0995595	0.158	0.272	2.91461e-33
SAFB2	1.51739e-37	-0.118866	0.209	0.334	3.03463e-33
SERP1	1.549e-37	-0.112942	0.295	0.437	3.09784e-33
SYNE2	1.65327e-37	-0.264834	0.728	0.784	3.30638e-33
TCP1	1.79573e-37	-0.105482	0.201	0.325	3.59128e-33
PHF3	1.81827e-37	-0.15168	0.359	0.501	3.63636e-33
CD52	2.14054e-37	0.197259	0.487	0.381	4.28087e-33
SPINT2	2.25961e-37	-0.0754672	0.056	0.133	4.51899e-33
NIPBL	2.2701e-37	-0.157486	0.412	0.555	4.53997e-33
SPOP	2.28423e-37	-0.095783	0.137	0.246	4.56823e-33
NUDT16L1	2.55587e-37	-0.0725903	0.054	0.131	5.11149e-33
H3F3A	2.58238e-37	0.0933699	0.123	0.042	5.16451e-33
TMEM204	2.71779e-37	-0.0819482	0.068	0.151	5.43531e-33
USP15	3.11855e-37	-0.125942	0.277	0.416	6.23679e-33
ETF1	3.30594e-37	-0.102235	0.136	0.242	6.61154e-33
PSMB5	3.76594e-37	-0.0696114	0.044	0.116	7.53151e-33
ABTB1	4.09168e-37	-0.0743531	0.059	0.138	8.18296e-33
ABCA7	5.33749e-37	-0.0899007	0.105	0.204	1.06744e-32
DNAJA1	5.61554e-37	-0.145924	0.325	0.461	1.12305e-32
ADAR	5.86208e-37	0.220741	0.566	0.484	1.17236e-32
TMEM129	6.25917e-37	-0.0663021	0.037	0.103	1.25177e-32
IRF3	7.13591e-37	-0.104934	0.162	0.277	1.42711e-32
CMTM6	7.2109e-37	-0.136612	0.171	0.285	1.44211e-32
NFE2L2	7.96127e-37	-0.0897939	0.109	0.208	1.59217e-32
MXD4	8.61943e-37	-0.0937336	0.096	0.19	1.7238e-32
UBE2D3	8.77731e-37	-0.12117	0.492	0.654	1.75537e-32
HADHA	9.04016e-37	-0.124408	0.289	0.426	1.80794e-32
FAM21C	9.7094e-37	0.123718	0.18	0.084	1.94178e-32
SCML4	1.08941e-36	-0.110382	0.173	0.288	2.17871e-32
DNAJB1	1.15097e-36	-0.188696	0.273	0.392	2.30183e-32
HERPUD1	1.16292e-36	-0.0826841	0.079	0.167	2.32573e-32
ZNF644	1.21444e-36	-0.108756	0.135	0.241	2.42876e-32
IL6R	1.24736e-36	-0.131724	0.33	0.474	2.49459e-32
TBC1D15	1.31157e-36	-0.101465	0.18	0.3	2.623e-32
RSL24D1	1.57198e-36	-0.103283	0.192	0.312	3.1438e-32
SURF1	1.67453e-36	-0.0848854	0.08	0.167	3.34889e-32
CDK5RAP3	2.0472e-36	-0.107852	0.175	0.291	4.09419e-32
MDH2	2.4061e-36	-0.0875974	0.112	0.212	4.81196e-32
GMFG	2.4586e-36	-0.122647	0.427	0.584	4.91695e-32
BBX	2.49257e-36	-0.140804	0.308	0.444	4.98489e-32
STAT4	2.59917e-36	-0.0864048	0.106	0.203	5.19807e-32
C8orf59	2.77985e-36	-0.069723	0.047	0.118	5.55942e-32
ITGB7	3.15863e-36	-0.12511	0.245	0.373	6.31694e-32
HSPE1	3.47394e-36	-0.0948138	0.118	0.218	6.94754e-32
SESN1	3.66265e-36	-0.076106	0.048	0.12	7.32494e-32
KLHL24	4.0373e-36	-0.0979054	0.11	0.207	8.0742e-32
TAP1	4.16141e-36	-0.104018	0.208	0.333	8.32241e-32
CDC42	4.72766e-36	-0.121044	0.425	0.577	9.45486e-32
DVL1	5.75039e-36	-0.0659844	0.04	0.108	1.15002e-31
EIF5B	5.97583e-36	-0.137904	0.256	0.383	1.19511e-31
IL10RB	6.0422e-36	-0.0814346	0.079	0.165	1.20838e-31
UGP2	6.61451e-36	-0.125671	0.284	0.417	1.32284e-31
CALM2	7.16774e-36	-0.112654	0.33	0.473	1.43348e-31
EIF4A3	7.75726e-36	-0.0948619	0.107	0.203	1.55138e-31
KPNB1	7.91807e-36	-0.127749	0.366	0.516	1.58354e-31
GPR183	8.00612e-36	-0.115159	0.132	0.234	1.60114e-31
ERP29	8.89708e-36	-0.12618	0.369	0.513	1.77933e-31
KTN1	9.35775e-36	-0.120211	0.379	0.53	1.87146e-31
SPOCK2	1.12595e-35	-0.158164	0.653	0.791	2.25179e-31
PSMC5	1.15923e-35	-0.104581	0.255	0.39	2.31834e-31
FIP1L1	1.37533e-35	-0.10447	0.128	0.229	2.75053e-31
TRAP1	1.56526e-35	-0.0867931	0.083	0.17	3.13037e-31
PRDX1	1.5772e-35	-0.088981	0.116	0.216	3.15423e-31
RFC1	1.58527e-35	-0.105355	0.191	0.31	3.17037e-31
IRF2BP2	1.81401e-35	-0.112408	0.23	0.356	3.62784e-31
PNPLA8	2.30232e-35	-0.0925897	0.094	0.185	4.6044e-31
SORL1	2.31852e-35	-0.151565	0.509	0.656	4.63681e-31
CCDC66	3.08364e-35	-0.105704	0.173	0.287	6.16697e-31
INF2	3.41581e-35	-0.0790295	0.069	0.15	6.83129e-31
LYZ	3.53097e-35	-0.0994743	0.084	0.172	7.06159e-31
DNAAF2	3.54433e-35	-0.0715661	0.047	0.117	7.0883e-31
SEC11A	3.66693e-35	-0.0963084	0.133	0.236	7.33349e-31
PYCR2	4.12474e-35	-0.0810707	0.082	0.168	8.24907e-31
LAMP1	4.4139e-35	-0.0948322	0.161	0.273	8.82735e-31
RBPJ	4.77735e-35	-0.108491	0.124	0.223	9.55423e-31
MRPL20	4.85789e-35	-0.0819309	0.075	0.158	9.71529e-31
SCRN2	5.30672e-35	-0.0698198	0.042	0.11	1.06129e-30
TMEM14B	5.85002e-35	-0.0790238	0.096	0.188	1.16995e-30
ARRB2	6.03373e-35	-0.0935446	0.159	0.269	1.20668e-30
DDIT3	6.64919e-35	-0.0688149	0.037	0.101	1.32977e-30
KIAA1147	6.65492e-35	-0.108874	0.158	0.267	1.33092e-30
CCNL1	6.73315e-35	-0.137533	0.583	0.741	1.34656e-30
YY1	6.9558e-35	-0.116699	0.365	0.507	1.39109e-30
CUL5	7.91341e-35	-0.0938554	0.103	0.197	1.5826e-30
SLC7A6	7.94107e-35	-0.0990052	0.121	0.219	1.58814e-30
PRPF38B	8.52759e-35	-0.142345	0.345	0.48	1.70543e-30
RNF145	8.72982e-35	-0.0927744	0.136	0.24	1.74588e-30
USP3	9.2004e-35	-0.0939596	0.16	0.271	1.83999e-30
FAM134B	9.25742e-35	-0.107875	0.14	0.243	1.85139e-30
DNAJB2	9.38727e-35	-0.0847706	0.087	0.174	1.87736e-30
C4orf3	1.22744e-34	-0.119543	0.297	0.43	2.45475e-30
EIF3L	1.40359e-34	-0.105735	0.314	0.456	2.80705e-30
RBMS1	1.49243e-34	-0.112662	0.234	0.358	2.98471e-30
DNAJC21	1.53255e-34	-0.09992	0.147	0.253	3.06494e-30
TRMT13	1.57744e-34	-0.0794577	0.062	0.139	3.15473e-30
PSMB8	1.60426e-34	-0.104589	0.266	0.4	3.20836e-30
ARAP1	1.83286e-34	-0.0731133	0.058	0.133	3.66554e-30
KDM5C	2.26641e-34	-0.0840499	0.093	0.182	4.53259e-30
UQCRC2	2.33304e-34	-0.0895218	0.166	0.279	4.66585e-30
SNX9	2.3489e-34	-0.0861281	0.087	0.175	4.69757e-30
KHDRBS1	2.38861e-34	-0.112652	0.297	0.43	4.77697e-30
MOB2	2.75712e-34	-0.0707081	0.061	0.138	5.51397e-30
EXOSC7	2.77085e-34	-0.07535	0.052	0.123	5.54142e-30
HTATSF1	2.87744e-34	-0.113956	0.215	0.335	5.75459e-30
ZNRD1-AS1	3.1472e-34	0.0816642	0.109	0.035	6.29408e-30
AMFR	3.18937e-34	-0.0748223	0.068	0.148	6.37842e-30
ARID5A	3.37722e-34	-0.0840218	0.099	0.191	6.75411e-30
RSL1D1	3.6299e-34	-0.12221	0.379	0.526	7.25944e-30
ASAH1	3.89553e-34	-0.0715575	0.066	0.145	7.79067e-30
HLA-DRA	4.12438e-34	-0.0747775	0.043	0.11	8.24836e-30
2020-09-09	4.23356e-34	-0.113533	0.423	0.579	8.4667e-30
SCAP	4.48682e-34	-0.0708557	0.059	0.134	8.97319e-30
LPAR2	4.52139e-34	-0.0692842	0.045	0.113	9.04234e-30
GNAS	4.79202e-34	-0.132166	0.647	0.8	9.58356e-30
BECN1	4.86878e-34	-0.0835811	0.105	0.198	9.73708e-30
ARHGAP4	4.97415e-34	-0.10598	0.301	0.439	9.9478e-30
ERAP2	5.11728e-34	-0.118911	0.186	0.299	1.02341e-29
MAX	5.50983e-34	-0.100946	0.165	0.273	1.10191e-29
ELF1	5.70326e-34	-0.124216	0.371	0.514	1.1406e-29
NELL2	5.76507e-34	-0.117799	0.137	0.238	1.15296e-29
CAMK2D	5.92036e-34	-0.0926801	0.097	0.186	1.18401e-29
PRKCQ-AS1	6.02506e-34	-0.103757	0.158	0.264	1.20495e-29
ANKRD11	6.23987e-34	-0.151978	0.366	0.501	1.24791e-29
RSRC1	6.50095e-34	-0.0914579	0.087	0.172	1.30013e-29
ZC3H6	6.82724e-34	-0.0978759	0.124	0.223	1.36538e-29
DEK	7.35133e-34	-0.119277	0.347	0.486	1.47019e-29
NOL8	7.71545e-34	-0.125864	0.208	0.324	1.54301e-29
IGBP1	8.36989e-34	-0.0977368	0.174	0.286	1.67389e-29
CCAR1	8.68142e-34	-0.105761	0.213	0.333	1.7362e-29
FAIM3	9.87644e-34	-0.101621	0.232	0.359	1.97519e-29
IGF2R	1.06482e-33	-0.112689	0.19	0.303	2.12954e-29
HEXA	1.07291e-33	-0.07109	0.051	0.122	2.14572e-29
ALDOA	1.1375e-33	-0.0947663	0.316	0.458	2.27488e-29
DDX46	1.13872e-33	-0.125679	0.285	0.413	2.27732e-29
RB1CC1	1.15101e-33	-0.104692	0.189	0.304	2.30191e-29
RNF213	1.15177e-33	0.175021	0.768	0.73	2.30342e-29
HNRNPD	1.197e-33	-0.114095	0.448	0.6	2.39389e-29
LCK	1.2153e-33	-0.118228	0.457	0.611	2.43049e-29
TXNL4A	1.30491e-33	-0.0916656	0.131	0.23	2.6097e-29
BCAS2	1.41104e-33	-0.0830918	0.096	0.185	2.82193e-29
GALNT1	1.45704e-33	-0.0889905	0.097	0.187	2.91393e-29
TBC1D14	1.53478e-33	-0.0799274	0.073	0.153	3.06941e-29
MAN1B1	1.61181e-33	-0.0701641	0.054	0.126	3.22345e-29
RING1	1.61693e-33	-0.0787116	0.072	0.152	3.2337e-29
RHOT2	1.83811e-33	-0.0828749	0.097	0.187	3.67604e-29
PDE3B	2.33212e-33	-0.12565	0.247	0.369	4.66401e-29
SHPRH	2.49279e-33	-0.0964705	0.078	0.159	4.98532e-29
RNF166	2.49596e-33	-0.0764214	0.086	0.172	4.99167e-29
SNHG17	2.91857e-33	-0.0741658	0.054	0.125	5.83685e-29
SMAP1	3.02533e-33	-0.0665066	0.05	0.12	6.05036e-29
PCNT	3.44111e-33	-0.122331	0.194	0.309	6.88188e-29
ECH1	3.54503e-33	-0.0926693	0.137	0.238	7.0897e-29
VTI1B	3.73814e-33	-0.075061	0.073	0.153	7.47591e-29
FAM102A	4.19458e-33	-0.0964585	0.184	0.296	8.38874e-29
APP	4.25619e-33	-0.0814142	0.084	0.169	8.51196e-29
PABPC3	4.74939e-33	0.0898662	0.129	0.05	9.49831e-29
NME1	4.81799e-33	-0.0747149	0.067	0.145	9.63549e-29
CD59	5.03304e-33	-0.0890295	0.092	0.179	1.00656e-28
CHD2	5.08924e-33	-0.150654	0.528	0.67	1.0178e-28
EIF3J	5.135e-33	-0.0923973	0.136	0.237	1.02695e-28
TBC1D10C	5.16476e-33	-0.110203	0.282	0.409	1.0329e-28
TYW3	5.30758e-33	-0.0847916	0.087	0.171	1.06146e-28
HNRNPF	5.35883e-33	-0.103623	0.277	0.409	1.07171e-28
DDX21	5.52351e-33	-0.129821	0.373	0.513	1.10465e-28
NBPF12	6.44652e-33	0.0917184	0.132	0.052	1.28924e-28
VIM	6.64462e-33	-0.150868	0.684	0.812	1.32886e-28
NPEPL1	6.76712e-33	-0.0686316	0.041	0.105	1.35336e-28
RBM17	6.80322e-33	-0.11071	0.238	0.36	1.36058e-28
MGAT4B	6.82113e-33	-0.0618464	0.043	0.108	1.36416e-28
SKAP1	7.62725e-33	-0.0981806	0.2	0.316	1.52537e-28
IRS2	8.03945e-33	-0.109001	0.117	0.21	1.60781e-28
HLA-G	8.30309e-33	-0.0824623	0.121	0.218	1.66053e-28
NARF	8.82435e-33	-0.0902292	0.123	0.219	1.76478e-28
LRIG1	8.86088e-33	-0.0859305	0.089	0.173	1.77209e-28
HABP4	9.15597e-33	-0.0755755	0.066	0.143	1.8311e-28
CEP350	9.55169e-33	-0.147799	0.358	0.49	1.91024e-28
IDH3B	9.67428e-33	-0.0832466	0.095	0.182	1.93476e-28
APBB1	9.7838e-33	-0.086782	0.1	0.189	1.95666e-28
H2AFZ	1.03845e-32	-0.0952686	0.203	0.32	2.07679e-28
MGAT4A	1.23622e-32	-0.109451	0.31	0.447	2.47232e-28
KLF6	1.33712e-32	-0.367694	0.651	0.714	2.6741e-28
FAM13A	1.41145e-32	-0.147487	0.071	0.148	2.82275e-28
CRAMP1L	1.45572e-32	-0.0650734	0.042	0.107	2.91129e-28
ZMAT2	1.4734e-32	-0.0972052	0.171	0.279	2.94665e-28
DACT1	1.74618e-32	-0.101555	0.04	0.103	3.4922e-28
CCM2	1.85042e-32	-0.0928434	0.149	0.251	3.70066e-28
MORC3	1.93984e-32	-0.104305	0.193	0.306	3.87949e-28
RABGGTB	2.15645e-32	-0.0766086	0.096	0.184	4.31269e-28
GOLGA8A	2.44173e-32	0.169607	0.373	0.266	4.88321e-28
SNHG7	2.70039e-32	-0.0805604	0.1	0.189	5.4005e-28
EIF3F	2.96029e-32	-0.110042	0.309	0.441	5.92028e-28
FAM101B	3.05886e-32	-0.104835	0.221	0.34	6.11741e-28
FBXO33	3.36121e-32	-0.0911199	0.132	0.231	6.72208e-28
ESYT2	4.07031e-32	-0.100807	0.289	0.42	8.14022e-28
CHURC1	4.37391e-32	-0.106059	0.232	0.352	8.74738e-28
PRKCH	4.38098e-32	-0.0995949	0.268	0.396	8.76152e-28
CD81	4.506e-32	-0.0916147	0.159	0.264	9.01156e-28
CSTB	5.27319e-32	-0.0730832	0.072	0.15	1.05459e-27
ANKRD36C	5.36828e-32	-0.124156	0.175	0.279	1.0736e-27
CCDC174	6.06268e-32	-0.0768947	0.061	0.134	1.21248e-27
PRPF19	6.85455e-32	-0.0868175	0.118	0.212	1.37084e-27
GTPBP6	7.43427e-32	-0.0773102	0.087	0.171	1.48678e-27
UQCRH	7.46169e-32	-0.102494	0.255	0.378	1.49226e-27
AP3M2	7.52279e-32	-0.0929679	0.105	0.194	1.50448e-27
LTB	8.08179e-32	-0.201803	0.823	0.869	1.61628e-27
LTN1	8.21626e-32	-0.0948336	0.114	0.206	1.64317e-27
LTBP3	8.37121e-32	-0.0823342	0.09	0.174	1.67416e-27
H2AFY	8.37883e-32	-0.099574	0.224	0.342	1.67568e-27
CREBRF	9.28108e-32	-0.111591	0.252	0.375	1.85612e-27
TRABD	9.50413e-32	-0.0801935	0.106	0.196	1.90073e-27
AZIN1	9.73855e-32	-0.0833766	0.144	0.245	1.94761e-27
BNIP3L	1.03557e-31	-0.081763	0.105	0.195	2.07104e-27
2020-09-15	1.05187e-31	-0.0980835	0.208	0.322	2.10364e-27
MRPS21	1.09896e-31	-0.0849963	0.149	0.252	2.19781e-27
POLG	1.36476e-31	-0.0838262	0.106	0.195	2.72939e-27
TRIP11	1.39144e-31	-0.128448	0.176	0.281	2.78274e-27
URI1	1.51335e-31	-0.09066	0.198	0.312	3.02655e-27
KIAA2026	1.69983e-31	-0.107296	0.182	0.291	3.39949e-27
KDM6A	1.72112e-31	-0.0775818	0.091	0.175	3.44207e-27
N4BP2L2	2.01785e-31	-0.123452	0.347	0.478	4.03551e-27
NDUFA13	2.15179e-31	-0.0804052	0.105	0.193	4.30336e-27
PPDPF	2.18368e-31	-0.082466	0.108	0.198	4.36714e-27
AHNAK	2.21436e-31	0.272688	0.661	0.609	4.4285e-27
FBXO18	2.33831e-31	-0.084929	0.103	0.19	4.67639e-27
HAX1	2.37458e-31	-0.0812576	0.108	0.197	4.74891e-27
PDE4D	2.45033e-31	-0.13633	0.139	0.235	4.90041e-27
MRPS6	2.53752e-31	-0.0732641	0.074	0.152	5.07479e-27
REXO2	2.54763e-31	-0.0983574	0.153	0.254	5.09501e-27
ZRSR2	2.73007e-31	-0.0797051	0.081	0.16	5.45987e-27
SSRP1	2.75164e-31	-0.103452	0.235	0.353	5.503e-27
ERCC5	3.04007e-31	-0.0862673	0.119	0.211	6.07983e-27
MPC2	3.16303e-31	-0.0685488	0.061	0.133	6.32574e-27
TXLNG	3.63056e-31	-0.0941436	0.11	0.199	7.26075e-27
SH2B1	3.86318e-31	-0.0676046	0.063	0.136	7.72598e-27
ALYREF	3.89883e-31	-0.0648724	0.054	0.123	7.79727e-27
UFC1	4.28454e-31	-0.0926577	0.195	0.306	8.56865e-27
PSAP	4.47934e-31	-0.114255	0.413	0.554	8.95823e-27
CNPY2	4.63305e-31	-0.0687439	0.062	0.134	9.26563e-27
ANK3	4.77953e-31	-0.102391	0.137	0.234	9.55858e-27
ZNF330	4.83441e-31	-0.0765033	0.058	0.128	9.66833e-27
2020-09-02	4.97044e-31	-0.106303	0.281	0.406	9.94039e-27
SNN	5.07283e-31	-0.0629485	0.048	0.114	1.01452e-26
PDAP1	5.08845e-31	-0.0863482	0.144	0.243	1.01764e-26
HSF1	5.2495e-31	-0.0610858	0.048	0.113	1.04985e-26
CTSD	5.34462e-31	-0.0748974	0.086	0.168	1.06887e-26
PLK3	5.75386e-31	-0.0650572	0.05	0.117	1.15071e-26
MED10	6.26451e-31	-0.0819288	0.131	0.228	1.25284e-26
TRAPPC6A	6.3519e-31	-0.076427	0.088	0.171	1.27032e-26
RARRES3	6.82669e-31	-0.0872022	0.225	0.345	1.36527e-26
NACA2	7.32495e-31	0.0736421	0.104	0.035	1.46492e-26
GTPBP4	7.5443e-31	-0.100512	0.131	0.225	1.50878e-26
U2AF1	8.43908e-31	-0.0909552	0.197	0.311	1.68773e-26
PPP2CA	9.23598e-31	-0.0874211	0.163	0.267	1.8471e-26
PCED1A	9.67486e-31	-0.0598658	0.044	0.107	1.93487e-26
ESF1	9.90954e-31	-0.0922198	0.087	0.168	1.98181e-26
PLEKHJ1	1.09153e-30	-0.0697324	0.091	0.174	2.18295e-26
IGHA1	1.11072e-30	-0.104626	0.068	0.142	2.22133e-26
WDR33	1.11262e-30	-0.0928345	0.149	0.248	2.22513e-26
FAM175A	1.28608e-30	-0.066569	0.045	0.108	2.57204e-26
NME3	1.30241e-30	-0.0751245	0.075	0.151	2.60469e-26
ITSN2	1.33601e-30	-0.136771	0.329	0.455	2.67188e-26
STMN3	1.40802e-30	-0.0746337	0.092	0.176	2.8159e-26
TSHZ2	1.55736e-30	-0.12623	0.14	0.236	3.11457e-26
PABPC1	1.59688e-30	-0.114658	0.986	0.985	3.19359e-26
COX14	1.88075e-30	-0.0748828	0.114	0.205	3.76131e-26
FRMD4B	2.05521e-30	-0.0752262	0.043	0.104	4.11021e-26
PRKX	2.13253e-30	-0.100164	0.21	0.325	4.26485e-26
SRI	2.32835e-30	-0.0789713	0.101	0.186	4.65647e-26
KANSL2	2.43619e-30	-0.0688086	0.066	0.139	4.87213e-26
SMC4	2.71059e-30	-0.109551	0.125	0.215	5.4209e-26
BCL11B	2.7169e-30	-0.139573	0.519	0.649	5.43352e-26
LSM6	2.85129e-30	-0.0694836	0.065	0.138	5.70229e-26
ANXA7	2.89225e-30	-0.0793575	0.137	0.234	5.78421e-26
CHCHD10	2.96289e-30	-0.0689604	0.066	0.139	5.92549e-26
TIA1	3.27836e-30	-0.102389	0.202	0.31	6.55639e-26
TM9SF3	3.39873e-30	-0.0953062	0.235	0.352	6.79711e-26
ZC3H15	3.62114e-30	-0.0874376	0.193	0.304	7.24192e-26
WDR60	3.68215e-30	-0.0873645	0.092	0.175	7.36393e-26
RCN2	3.90334e-30	-0.0671935	0.066	0.138	7.80628e-26
XPC	3.9271e-30	-0.11094	0.183	0.286	7.85381e-26
AKT2	4.09768e-30	-0.0782607	0.108	0.195	8.19494e-26
WHSC1L1	4.18812e-30	-0.104547	0.407	0.552	8.37582e-26
RALY	4.5393e-30	-0.0918232	0.167	0.268	9.07815e-26
NR1H2	4.85562e-30	-0.0625931	0.056	0.125	9.71075e-26
ERICH1	4.92045e-30	-0.0940136	0.157	0.257	9.8404e-26
RIOK1	5.10115e-30	-0.0834999	0.089	0.169	1.02018e-25
H2AFV	5.60667e-30	-0.0907619	0.217	0.332	1.12128e-25
ARFRP1	5.99187e-30	-0.0748539	0.075	0.151	1.19831e-25
DPP4	6.09686e-30	-0.119477	0.193	0.297	1.21931e-25
UBE2B	6.14299e-30	-0.0854697	0.157	0.258	1.22854e-25
XAF1	6.48249e-30	0.279504	0.42	0.339	1.29643e-25
CENPK	6.77902e-30	-0.0658417	0.043	0.105	1.35574e-25
TPI1	6.80902e-30	-0.0846701	0.222	0.338	1.36174e-25
CCDC109B	6.9004e-30	-0.0936974	0.226	0.341	1.38001e-25
MORF4L1	7.09323e-30	-0.0977609	0.287	0.413	1.41857e-25
TMEM87A	7.34832e-30	-0.0865162	0.112	0.2	1.46959e-25
ARHGEF18	7.42885e-30	-0.079124	0.103	0.188	1.4857e-25
SRSF6	7.56197e-30	-0.0964169	0.262	0.384	1.51232e-25
NIPA2	7.72542e-30	-0.0648743	0.06	0.129	1.54501e-25
DDX54	8.01024e-30	-0.0883563	0.128	0.22	1.60197e-25
SBNO2	8.31184e-30	-0.0768071	0.094	0.177	1.66228e-25
DARS	1.03155e-29	-0.0893489	0.19	0.299	2.06299e-25
ZC3H13	1.07751e-29	-0.118969	0.27	0.39	2.15492e-25
GOLGB1	1.09986e-29	-0.155797	0.268	0.381	2.19962e-25
POLR2B	1.18206e-29	-0.0920388	0.179	0.284	2.36399e-25
BTG2	1.31391e-29	-0.120248	0.245	0.359	2.62769e-25
RCSD1	1.40204e-29	-0.0969352	0.303	0.435	2.80395e-25
CORO1A	1.44908e-29	-0.117497	0.51	0.654	2.89801e-25
SRSF11	1.51771e-29	-0.125276	0.521	0.664	3.03526e-25
PHF20L1	1.56863e-29	-0.103236	0.207	0.317	3.1371e-25
SELK	1.59754e-29	-0.0808356	0.111	0.198	3.19492e-25
SAMSN1	1.65335e-29	-0.0825223	0.093	0.174	3.30654e-25
SEC63	1.72399e-29	-0.101059	0.193	0.3	3.4478e-25
SRP14	1.81211e-29	-0.0838376	0.351	0.491	3.62405e-25
ZCCHC17	1.91483e-29	-0.0730602	0.066	0.137	3.82947e-25
KLF9	1.95367e-29	-0.115036	0.246	0.36	3.90715e-25
RSBN1	1.96566e-29	-0.0958976	0.211	0.322	3.93113e-25
PTTG1IP	2.13934e-29	-0.085634	0.151	0.25	4.27846e-25
ARFGAP1	2.19131e-29	-0.0733844	0.082	0.159	4.3824e-25
PHAX	2.22553e-29	-0.0808429	0.085	0.163	4.45084e-25
CHTOP	2.45988e-29	-0.0831887	0.133	0.226	4.91952e-25
DIP2B	2.55927e-29	-0.0711347	0.086	0.166	5.11829e-25
PPP1R12C	2.84087e-29	-0.0797844	0.106	0.191	5.68145e-25
RBM14	2.85382e-29	-0.0632347	0.045	0.107	5.70736e-25
IGHG4	2.8752e-29	-0.12144	0.081	0.159	5.75011e-25
CCT5	3.20667e-29	-0.0897857	0.178	0.281	6.41303e-25
ETFA	3.26643e-29	-0.0686039	0.074	0.149	6.53253e-25
DNAJC2	3.50463e-29	-0.091335	0.132	0.224	7.00891e-25
CDV3	3.55605e-29	-0.116021	0.437	0.575	7.11173e-25
BTF3	3.70478e-29	-0.110783	0.497	0.641	7.4092e-25
PSMA4	3.99691e-29	-0.0863261	0.182	0.288	7.99342e-25
UFL1	4.11711e-29	-0.0954514	0.125	0.214	8.23381e-25
NSRP1	4.19238e-29	-0.101102	0.113	0.199	8.38433e-25
JMY	4.19924e-29	-0.0977752	0.148	0.245	8.39806e-25
POLR1C	4.56987e-29	-0.0617965	0.042	0.101	9.13928e-25
ELP2	4.69928e-29	-0.0835966	0.136	0.23	9.39808e-25
MAP2K1	4.81604e-29	-0.0779545	0.109	0.195	9.63159e-25
SART3	5.3547e-29	-0.0943329	0.132	0.224	1.07089e-24
TOMM22	5.57917e-29	-0.0740323	0.091	0.171	1.11578e-24
BIRC2	5.65851e-29	-0.0918279	0.156	0.254	1.13164e-24
HNRNPL	5.72457e-29	-0.0796541	0.178	0.285	1.14486e-24
DHPS	6.11592e-29	-0.0644977	0.054	0.119	1.22312e-24
GPR132	6.56881e-29	-0.0606352	0.044	0.104	1.3137e-24
RER1	6.85663e-29	-0.0725853	0.099	0.182	1.37126e-24
PEBP1	7.03735e-29	-0.101148	0.305	0.429	1.4074e-24
TFRC	7.04178e-29	-0.0823386	0.109	0.194	1.40829e-24
SMCHD1	7.65443e-29	-0.159796	0.6	0.724	1.53081e-24
CBX3	7.69821e-29	-0.0902929	0.227	0.341	1.53956e-24
MVP	8.08323e-29	-0.0982966	0.264	0.383	1.61657e-24
PA2G4	8.15748e-29	-0.0842426	0.175	0.278	1.63141e-24
AMMECR1L	8.1632e-29	-0.0680808	0.047	0.109	1.63256e-24
LAMTOR5	8.63588e-29	-0.0752344	0.115	0.203	1.72709e-24
S1PR4	9.79236e-29	-0.0812691	0.134	0.227	1.95837e-24
PELI1	1.12472e-28	-0.0838222	0.078	0.153	2.24932e-24
CWC25	1.15443e-28	-0.0766089	0.109	0.195	2.30874e-24
SYAP1	1.16061e-28	-0.0864927	0.107	0.191	2.3211e-24
GPR155	1.23756e-28	-0.0960491	0.14	0.234	2.47499e-24
MPHOSPH10	1.26511e-28	-0.0881391	0.125	0.214	2.5301e-24
EML3	1.27293e-28	-0.0779425	0.098	0.179	2.54573e-24
UQCRQ	1.43234e-28	-0.0727602	0.13	0.223	2.86454e-24
UBE2E1	1.48121e-28	-0.0672548	0.075	0.15	2.96227e-24
PLEKHB2	1.845e-28	-0.0766155	0.121	0.21	3.68982e-24
CCNG1	1.9024e-28	-0.0746763	0.113	0.2	3.80461e-24
LAMTOR1	1.93074e-28	-0.070227	0.094	0.174	3.86129e-24
TWF2	1.97793e-28	-0.056887	0.046	0.107	3.95566e-24
ANKRD10	2.3894e-28	-0.0744723	0.097	0.178	4.77856e-24
MBD4	2.58185e-28	-0.077021	0.097	0.178	5.16344e-24
SKIV2L	2.64613e-28	-0.063463	0.055	0.12	5.29199e-24
USP48	2.73368e-28	-0.104639	0.206	0.311	5.46708e-24
RGS2	2.96183e-28	-0.0842203	0.061	0.129	5.92336e-24
HINT1	3.11246e-28	-0.0930762	0.303	0.428	6.22461e-24
U2SURP	3.20082e-28	-0.106618	0.331	0.458	6.40133e-24
MORC2	3.32215e-28	-0.0726706	0.092	0.172	6.64396e-24
CCDC85B	3.65062e-28	-0.0559461	0.045	0.105	7.30088e-24
COTL1	3.67198e-28	-0.105473	0.276	0.396	7.34359e-24
SYPL1	3.92894e-28	-0.0617276	0.07	0.142	7.85748e-24
NAMPT	4.18318e-28	-0.0686667	0.062	0.13	8.36594e-24
SLFN12L	4.20352e-28	-0.100336	0.158	0.253	8.40663e-24
SSBP4	4.31409e-28	-0.0643389	0.064	0.133	8.62774e-24
FGFR1OP2	4.32112e-28	-0.104891	0.244	0.355	8.64182e-24
PDCD2	4.33369e-28	-0.0843858	0.151	0.246	8.66695e-24
NDFIP1	4.39668e-28	-0.0887044	0.239	0.353	8.79293e-24
SNHG15	4.80651e-28	-0.0706233	0.082	0.157	9.61254e-24
SPTY2D1	5.38108e-28	-0.0869135	0.115	0.2	1.07616e-23
GPCPD1	5.52963e-28	-0.0894021	0.16	0.256	1.10587e-23
TCEB1	5.58523e-28	-0.0631302	0.063	0.132	1.11699e-23
PSMA7	5.62697e-28	-0.0873517	0.294	0.422	1.12534e-23
RBM25	5.85021e-28	-0.1204	0.423	0.558	1.16998e-23
NLRC5	5.8669e-28	-0.0891994	0.22	0.331	1.17332e-23
MED4	6.2226e-28	-0.0739425	0.094	0.172	1.24446e-23
NDUFA1	6.87092e-28	-0.0775126	0.212	0.323	1.37411e-23
DEF6	7.19361e-28	-0.0886369	0.2	0.306	1.43865e-23
KLHL5	7.22497e-28	-0.0616182	0.047	0.107	1.44492e-23
PFDN2	7.36035e-28	-0.0705844	0.08	0.154	1.472e-23
IK	7.72484e-28	-0.104694	0.321	0.443	1.54489e-23
SBF1	8.20393e-28	-0.079416	0.123	0.211	1.6407e-23
EIF6	8.65636e-28	-0.064195	0.059	0.124	1.73119e-23
HNRNPM	8.73065e-28	-0.112084	0.455	0.593	1.74604e-23
COX7A2	8.75341e-28	-0.0812347	0.246	0.363	1.75059e-23
ABRACL	9.85919e-28	-0.0758888	0.117	0.204	1.97174e-23
GUSB	1.06366e-27	-0.0668624	0.068	0.138	2.12721e-23
RNF216	1.14744e-27	-0.102547	0.23	0.339	2.29476e-23
CDK9	1.16262e-27	-0.0743472	0.093	0.171	2.32513e-23
IFI44L	1.20395e-27	0.193817	0.2	0.116	2.40777e-23
KIAA0020	1.2553e-27	-0.0705878	0.083	0.159	2.51047e-23
RABEP1	1.29676e-27	-0.0905934	0.16	0.256	2.59339e-23
TRIM56	1.3156e-27	-0.084743	0.088	0.164	2.63106e-23
FAM219B	1.37109e-27	-0.0659427	0.076	0.149	2.74204e-23
DPH5	1.51018e-27	-0.0580349	0.046	0.107	3.02021e-23
RGP1	1.5938e-27	-0.0650121	0.05	0.111	3.18745e-23
CKLF	1.60944e-27	-0.0598874	0.057	0.121	3.21871e-23
DDX27	1.61889e-27	-0.0908009	0.168	0.267	3.23763e-23
CNST	1.79303e-27	-0.0882397	0.156	0.252	3.58587e-23
RCAN3	1.82687e-27	-0.106857	0.419	0.557	3.65356e-23
FAN1	1.85529e-27	-0.0691875	0.052	0.114	3.71038e-23
PMPCB	1.87778e-27	-0.0778264	0.129	0.218	3.75536e-23
DNAJC8	1.93272e-27	-0.0812097	0.176	0.276	3.86525e-23
HNRNPA0	2.0681e-27	-0.0903848	0.243	0.356	4.136e-23
PRPF40A	2.22456e-27	-0.098222	0.31	0.435	4.44889e-23
SDCBP	2.27392e-27	-0.0788175	0.121	0.208	4.54761e-23
CDIPT	2.48377e-27	-0.0698671	0.087	0.163	4.96729e-23
TAF10	2.6066e-27	-0.0760939	0.116	0.202	5.21293e-23
TECPR1	2.83808e-27	-0.0865935	0.17	0.269	5.67588e-23
ALKBH7	2.99651e-27	-0.0693588	0.078	0.151	5.99273e-23
CRYZL1	3.15696e-27	-0.0631844	0.043	0.101	6.31361e-23
CISH	3.24209e-27	-0.105865	0.161	0.254	6.48385e-23
SLC35C2	3.26536e-27	-0.0614493	0.058	0.123	6.53039e-23
N4BP2L1	3.33067e-27	-0.0601162	0.053	0.116	6.66101e-23
RTFDC1	4.01354e-27	-0.0804045	0.126	0.213	8.02669e-23
SNW1	4.06856e-27	-0.0801203	0.176	0.277	8.13672e-23
2020-09-06	4.40029e-27	-0.10979	0.45	0.59	8.80013e-23
TAOK3	4.5478e-27	-0.0908405	0.234	0.346	9.09515e-23
CCT2	4.98759e-27	-0.0846133	0.21	0.317	9.97468e-23
EWSR1	5.09793e-27	-0.0916394	0.305	0.429	1.01954e-22
SMIM7	5.40014e-27	-0.0694611	0.063	0.129	1.07997e-22
ZNF395	5.70495e-27	-0.0705165	0.081	0.155	1.14093e-22
GNPTG	6.36322e-27	-0.06334	0.063	0.13	1.27258e-22
GHITM	6.71556e-27	-0.0887588	0.207	0.311	1.34304e-22
BAZ1A	6.85812e-27	-0.112407	0.297	0.415	1.37156e-22
CD99	7.98343e-27	-0.0780467	0.152	0.245	1.59661e-22
ZNF783	8.30392e-27	-0.0562442	0.043	0.101	1.6607e-22
SERF2	8.37586e-27	-0.10254	0.504	0.647	1.67509e-22
EMC7	8.96789e-27	-0.0646254	0.08	0.153	1.79349e-22
BIN1	9.27236e-27	-0.0848369	0.234	0.344	1.85438e-22
TBCD	9.43369e-27	-0.0696592	0.071	0.14	1.88664e-22
DAZAP1	9.80492e-27	-0.0810229	0.174	0.273	1.96088e-22
RNPEPL1	9.84154e-27	-0.07445	0.128	0.216	1.96821e-22
SIPA1	1.0054e-26	-0.0676476	0.095	0.173	2.01071e-22
TSPAN32	1.01007e-26	-0.0633877	0.052	0.113	2.02003e-22
JUND	1.01342e-26	-0.13481	0.253	0.356	2.02673e-22
IFNGR1	1.127e-26	-0.0663749	0.06	0.125	2.25388e-22
PIEZO1	1.2636e-26	-0.0791199	0.11	0.192	2.52707e-22
PRDX2	1.32936e-26	-0.0573736	0.053	0.115	2.65859e-22
CDK10	1.48131e-26	-0.0632819	0.072	0.142	2.96247e-22
HINT2	1.50475e-26	-0.0616038	0.054	0.116	3.00935e-22
GIGYF2	1.55501e-26	-0.106945	0.17	0.265	3.10987e-22
SFI1	1.59829e-26	-0.0855906	0.183	0.284	3.19641e-22
ACTR2	1.71304e-26	-0.108391	0.514	0.656	3.42592e-22
HBS1L	1.7527e-26	-0.0808057	0.101	0.179	3.50522e-22
RNH1	1.82736e-26	-0.0719832	0.107	0.189	3.65454e-22
ORMDL3	1.93619e-26	-0.0965225	0.216	0.319	3.87219e-22
NOB1	2.05364e-26	-0.066988	0.076	0.147	4.10707e-22
DYNLT1	2.18288e-26	-0.0639674	0.067	0.134	4.36554e-22
MLLT10	2.22006e-26	-0.0823568	0.149	0.241	4.43989e-22
ALKBH5	2.2526e-26	-0.0730172	0.139	0.229	4.50498e-22
MAT2A	2.36935e-26	-0.0743645	0.094	0.17	4.73846e-22
ADTRP	2.60382e-26	-0.0757119	0.086	0.16	5.20738e-22
TFAM	2.71192e-26	-0.0794953	0.141	0.232	5.42356e-22
SURF4	2.99848e-26	-0.0752533	0.118	0.201	5.99665e-22
FXR1	3.00872e-26	-0.0917008	0.266	0.38	6.01713e-22
PGP	3.05788e-26	-0.0530057	0.045	0.103	6.11546e-22
METTL17	3.06045e-26	-0.0635745	0.069	0.137	6.12059e-22
MATR3	3.07519e-26	-0.10363	0.545	0.693	6.15007e-22
TRMT6	3.12363e-26	-0.0697605	0.071	0.14	6.24694e-22
CROCC	3.23389e-26	-0.0579518	0.044	0.102	6.46745e-22
CELF2	3.24108e-26	-0.107423	0.378	0.503	6.48184e-22
RBBP4	3.51213e-26	-0.0744659	0.111	0.192	7.0239e-22
XPA	3.77757e-26	-0.0760089	0.086	0.16	7.55476e-22
ZBTB21	4.1101e-26	-0.0652623	0.058	0.122	8.2198e-22
SRPRB	4.24331e-26	-0.058791	0.063	0.129	8.4862e-22
AHCYL1	4.51445e-26	-0.0804352	0.13	0.217	9.02845e-22
OSBPL2	4.5575e-26	-0.0675802	0.072	0.141	9.11455e-22
METTL3	4.67663e-26	-0.071555	0.086	0.159	9.35279e-22
RGL2	5.01898e-26	-0.0644844	0.065	0.131	1.00375e-21
G3BP2	5.41953e-26	-0.10284	0.302	0.416	1.08385e-21
SLMAP	5.82533e-26	-0.0821833	0.136	0.223	1.16501e-21
TNFSF8	5.89646e-26	-0.0730574	0.087	0.16	1.17923e-21
ZNF770	5.91361e-26	-0.0876618	0.122	0.204	1.18266e-21
SNHG5	6.10777e-26	-0.138742	0.443	0.564	1.22149e-21
ZNF266	6.22887e-26	-0.0678099	0.102	0.182	1.24571e-21
PSMD3	6.33202e-26	-0.0669855	0.081	0.153	1.26634e-21
SLU7	6.4227e-26	-0.0917333	0.185	0.281	1.28448e-21
SUCLG2	7.16067e-26	-0.0717917	0.113	0.195	1.43206e-21
FAM193B	7.40921e-26	-0.072786	0.104	0.183	1.48177e-21
MAP2K7	7.5184e-26	-0.0723665	0.089	0.163	1.5036e-21
HAGH	8.11538e-26	-0.059192	0.059	0.122	1.623e-21
HMCES	9.4524e-26	-0.0733028	0.107	0.187	1.89039e-21
POMP	9.49163e-26	-0.0659241	0.101	0.18	1.89823e-21
TAX1BP1	9.6063e-26	-0.0946984	0.297	0.413	1.92116e-21
JUNB	9.66053e-26	-0.213417	0.4	0.515	1.93201e-21
IDH2	9.76443e-26	-0.0712117	0.1	0.177	1.95279e-21
CSNK1G2	9.9161e-26	-0.092967	0.249	0.358	1.98312e-21
UBE2G2	1.03196e-25	-0.0990049	0.33	0.45	2.06381e-21
IFRD1	1.05435e-25	-0.0657279	0.066	0.132	2.1086e-21
NDUFB2	1.07273e-25	-0.0743964	0.173	0.27	2.14536e-21
INSIG2	1.17253e-25	-0.0583296	0.047	0.104	2.34493e-21
SPAG9	1.18394e-25	-0.0836167	0.116	0.197	2.36776e-21
DECR1	1.21671e-25	-0.0692943	0.09	0.164	2.43329e-21
ORAI2	1.25184e-25	-0.0842823	0.085	0.156	2.50356e-21
NDRG1	1.3022e-25	-0.0839251	0.138	0.225	2.60428e-21
MUS81	1.51926e-25	-0.0577295	0.049	0.108	3.03838e-21
STK25	1.73919e-25	-0.0665712	0.083	0.155	3.47821e-21
CAPNS1	1.89846e-25	-0.0740847	0.224	0.332	3.79674e-21
LENG8	1.91584e-25	-0.0696611	0.084	0.156	3.83148e-21
HPCAL1	1.92867e-25	-0.0682572	0.101	0.179	3.85714e-21
IRF1	1.98547e-25	-0.106485	0.225	0.327	3.97074e-21
CDK5RAP2	2.03574e-25	-0.0992677	0.144	0.23	4.07128e-21
EMC4	2.06415e-25	-0.0723385	0.13	0.216	4.1281e-21
RNF113A	2.13444e-25	-0.066847	0.078	0.149	4.26867e-21
YWHAG	2.33109e-25	-0.0604352	0.073	0.142	4.66194e-21
AKAP8L	2.63696e-25	-0.0721797	0.106	0.184	5.27365e-21
SOCS3	2.6506e-25	-0.134037	0.325	0.434	5.30093e-21
RAB27A	2.74203e-25	-0.0786157	0.111	0.19	5.48379e-21
SERINC3	2.76494e-25	-0.0835267	0.22	0.325	5.5296e-21
UPF2	3.251e-25	-0.0909267	0.176	0.271	6.50167e-21
RBM23	3.42631e-25	-0.0921583	0.192	0.289	6.85228e-21
GYPC	3.50828e-25	-0.0783377	0.157	0.248	7.01622e-21
SREBF1	4.0712e-25	-0.0643625	0.076	0.145	8.14199e-21
GNB1	4.14824e-25	-0.0903041	0.334	0.456	8.29607e-21
MLEC	4.36323e-25	-0.0841062	0.13	0.213	8.72602e-21
CNOT4	4.46836e-25	-0.0656249	0.073	0.141	8.93627e-21
SLC25A28	4.94964e-25	-0.0721593	0.103	0.181	9.89878e-21
ITK	4.98936e-25	-0.0990235	0.415	0.545	9.97822e-21
PXN	5.27427e-25	-0.0776887	0.139	0.225	1.0548e-20
FAM184A	5.51549e-25	-0.0725751	0.046	0.102	1.10304e-20
NCLN	5.82594e-25	-0.05774	0.058	0.12	1.16513e-20
TRA2B	6.00677e-25	-0.0955673	0.432	0.569	1.20129e-20
DHX38	6.16104e-25	-0.0787671	0.108	0.185	1.23215e-20
CHMP3	6.28223e-25	-0.0747411	0.115	0.194	1.25638e-20
UBE2L6	6.357e-25	-0.07413	0.149	0.239	1.27134e-20
HSPA9	6.46277e-25	-0.0828303	0.297	0.416	1.29249e-20
NOP56	6.46613e-25	-0.0903275	0.305	0.421	1.29316e-20
MAPKAPK5-AS1	6.98787e-25	-0.0666279	0.091	0.165	1.3975e-20
PRPF31	7.09054e-25	-0.0693237	0.081	0.151	1.41804e-20
DDRGK1	8.66637e-25	-0.065963	0.081	0.151	1.73319e-20
TRPC4AP	8.68096e-25	-0.0640151	0.07	0.136	1.73611e-20
PSMB1	8.72605e-25	-0.0770334	0.244	0.354	1.74512e-20
VDAC1	8.82369e-25	-0.061898	0.079	0.148	1.76465e-20
HSPA13	9.05575e-25	-0.059484	0.053	0.113	1.81106e-20
SH3KBP1	9.53178e-25	-0.0943917	0.33	0.449	1.90626e-20
GTF2F1	9.79056e-25	-0.0828495	0.21	0.312	1.95801e-20
HLA-C	1.01411e-24	-0.119956	0.93	0.957	2.02811e-20
TXNDC11	1.02849e-24	-0.0545652	0.05	0.108	2.05689e-20
WDR74	1.03111e-24	-0.0560993	0.046	0.102	2.06211e-20
FBXW4	1.06276e-24	-0.056009	0.052	0.111	2.12542e-20
RAC2	1.09856e-24	-0.0918397	0.382	0.508	2.19701e-20
ANXA2R	1.11859e-24	-0.0587897	0.061	0.123	2.23707e-20
XBP1	1.14895e-24	-0.0837508	0.234	0.34	2.29779e-20
EXOC1	1.21954e-24	-0.0633834	0.086	0.158	2.43896e-20
UVRAG	1.22238e-24	-0.0667754	0.079	0.148	2.44463e-20
REPIN1	1.22737e-24	-0.0644517	0.074	0.141	2.45461e-20
HDAC7	1.23763e-24	-0.0772756	0.127	0.209	2.47514e-20
ATXN7	1.29363e-24	-0.0823977	0.199	0.299	2.58713e-20
HNRNPUL2	1.31352e-24	-0.0793583	0.139	0.224	2.62692e-20
OSER1	1.33039e-24	-0.0577777	0.061	0.124	2.66066e-20
GLUD1	1.39552e-24	-0.0791375	0.194	0.293	2.79091e-20
EDF1	1.4311e-24	-0.0848494	0.291	0.406	2.86207e-20
MRFAP1L1	1.51092e-24	-0.0816624	0.164	0.256	3.02169e-20
SRP72	1.57206e-24	-0.0867407	0.246	0.354	3.14397e-20
PTP4A1	1.6331e-24	-0.0872022	0.128	0.21	3.26603e-20
MAF	1.66772e-24	-0.113785	0.177	0.27	3.33527e-20
ODF2L	1.67863e-24	-0.085078	0.139	0.224	3.35708e-20
RALBP1	1.68916e-24	-0.0860629	0.203	0.301	3.37815e-20
PJA2	1.7063e-24	-0.0866672	0.212	0.312	3.41242e-20
MINA	1.74344e-24	-0.0624643	0.071	0.137	3.4867e-20
PDE7A	1.76488e-24	-0.0864331	0.22	0.322	3.52958e-20
LONP1	1.83173e-24	-0.0608863	0.063	0.126	3.66328e-20
C10orf54	1.88179e-24	-0.0824103	0.176	0.27	3.76338e-20
SRF	1.9185e-24	-0.0604352	0.074	0.141	3.83682e-20
FBXW7	1.95544e-24	-0.0857757	0.184	0.281	3.91069e-20
CSK	2.02418e-24	-0.0734649	0.172	0.266	4.04816e-20
TMEM14C	2.07269e-24	-0.0518044	0.052	0.111	4.14517e-20
TMEM18	2.17956e-24	-0.0553995	0.057	0.118	4.3589e-20
CHCHD7	2.30265e-24	-0.0731237	0.123	0.204	4.60507e-20
ERBB2IP	2.40225e-24	-0.101038	0.386	0.509	4.80426e-20
DERL1	2.43423e-24	-0.0656949	0.1	0.176	4.86822e-20
HARS	2.5086e-24	-0.0778579	0.111	0.189	5.01696e-20
NFKB1	2.59351e-24	-0.0898416	0.234	0.337	5.18676e-20
E4F1	2.60666e-24	-0.0549353	0.046	0.101	5.21305e-20
UFD1L	2.61328e-24	-0.07741	0.115	0.193	5.22629e-20
TNRC6B	2.65283e-24	-0.113107	0.457	0.59	5.30539e-20
PLCG1	2.66865e-24	-0.0848293	0.221	0.322	5.33704e-20
ACSL6	2.6902e-24	-0.0746542	0.105	0.181	5.38013e-20
CLNS1A	2.70191e-24	-0.0719137	0.125	0.207	5.40355e-20
GNL3	2.79375e-24	-0.0859925	0.2	0.296	5.58722e-20
DHRS3	2.82757e-24	-0.0601071	0.057	0.118	5.65486e-20
RAB3GAP1	3.14021e-24	-0.0755666	0.106	0.182	6.28011e-20
PLAC8	3.29577e-24	-0.0927094	0.262	0.369	6.59121e-20
NUBP2	3.83439e-24	-0.0584003	0.057	0.116	7.66839e-20
CRBN	3.90794e-24	-0.0813381	0.175	0.269	7.8155e-20
AGPAT6	3.99487e-24	-0.0640979	0.093	0.165	7.98935e-20
TEX264	4.07292e-24	-0.0623814	0.066	0.129	8.14544e-20
CXorf38	4.27453e-24	-0.061421	0.055	0.114	8.54863e-20
C21orf33	4.41986e-24	-0.0609122	0.087	0.158	8.83927e-20
PIH1D1	4.53019e-24	-0.0633927	0.081	0.15	9.05993e-20
NAA20	4.83991e-24	-0.0576796	0.069	0.134	9.67934e-20
PUF60	4.92197e-24	-0.0712905	0.16	0.25	9.84346e-20
FRA10AC1	4.97761e-24	-0.0682716	0.076	0.143	9.95472e-20
STT3B	5.12163e-24	-0.0932817	0.303	0.417	1.02428e-19
CSTF2T	5.1587e-24	-0.0625388	0.073	0.139	1.03169e-19
SIVA1	5.1824e-24	-0.0633644	0.116	0.195	1.03643e-19
CLIC1	5.19853e-24	-0.065388	0.07	0.135	1.03965e-19
SSB	5.29315e-24	-0.0752415	0.174	0.268	1.05858e-19
ARFGAP2	5.45166e-24	-0.0688879	0.088	0.158	1.09028e-19
NKAP	5.68838e-24	-0.0611663	0.066	0.13	1.13762e-19
TMEM63A	5.74173e-24	-0.0927531	0.205	0.301	1.14829e-19
HCP5	6.01624e-24	-0.0590626	0.068	0.133	1.20319e-19
WDR43	6.07318e-24	-0.0773916	0.185	0.28	1.21457e-19
DAZAP2	6.30173e-24	-0.0705365	0.326	0.454	1.26028e-19
PSMB6	6.5123e-24	-0.0750766	0.146	0.232	1.30239e-19
WDR83OS	6.59186e-24	-0.0641729	0.09	0.161	1.31831e-19
PPP3CC	6.64682e-24	-0.0572581	0.067	0.131	1.3293e-19
AMD1	6.79801e-24	-0.0750501	0.16	0.25	1.35953e-19
DANCR	6.80874e-24	-0.0549829	0.059	0.119	1.36168e-19
MRPL24	7.10718e-24	-0.0606542	0.068	0.132	1.42136e-19
MED6	7.42136e-24	-0.0558267	0.056	0.115	1.4842e-19
DHX30	7.62352e-24	-0.0672196	0.108	0.185	1.52463e-19
PPTC7	8.11142e-24	-0.080049	0.157	0.245	1.6222e-19
SRPK2	8.43835e-24	-0.0679327	0.11	0.188	1.68759e-19
ADNP2	8.52527e-24	-0.0605999	0.062	0.124	1.70497e-19
COPS5	9.16059e-24	-0.0618348	0.082	0.15	1.83203e-19
USP34	9.20981e-24	-0.106032	0.353	0.472	1.84187e-19
C14orf166	9.48726e-24	-0.0645894	0.111	0.189	1.89736e-19
ERGIC1	9.70078e-24	-0.0609961	0.073	0.138	1.94006e-19
PRPF4B	9.79348e-24	-0.0963911	0.344	0.462	1.9586e-19
CYBA	9.84831e-24	-0.0729912	0.228	0.334	1.96956e-19
FAM89B	9.95706e-24	-0.0554654	0.055	0.114	1.99131e-19
RUNX3	1.07858e-23	-0.0866477	0.208	0.305	2.15705e-19
MAPKAPK5	1.08903e-23	-0.0547474	0.06	0.121	2.17795e-19
ZC3H12D	1.09976e-23	-0.0512727	0.049	0.105	2.19942e-19
HDAC3	1.10135e-23	-0.0550642	0.054	0.112	2.20259e-19
WIPF1	1.19749e-23	-0.0844697	0.392	0.522	2.39486e-19
UPF3B	1.23177e-23	-0.0665156	0.057	0.115	2.46343e-19
CSDE1	1.23369e-23	-0.113358	0.675	0.794	2.46727e-19
PCMTD1	1.3026e-23	-0.0771928	0.132	0.214	2.60507e-19
PICALM	1.3044e-23	-0.0702426	0.136	0.22	2.60867e-19
ZRANB2	1.30919e-23	-0.0925427	0.231	0.33	2.61824e-19
CTSA	1.42338e-23	-0.0720974	0.093	0.165	2.84663e-19
UBE2K	1.49098e-23	-0.0776658	0.187	0.282	2.98182e-19
TOMM7	1.57609e-23	-0.0769543	0.403	0.535	3.15203e-19
DDX1	1.57687e-23	-0.0767308	0.145	0.23	3.15358e-19
THRAP3	1.67657e-23	-0.096524	0.373	0.492	3.35296e-19
SLC2A3	1.69031e-23	-0.119549	0.31	0.42	3.38045e-19
EIF2B5	1.7214e-23	-0.0758792	0.123	0.203	3.44262e-19
SSBP1	1.8292e-23	-0.0788175	0.193	0.288	3.65822e-19
BATF	1.88512e-23	-0.0760515	0.085	0.153	3.77006e-19
WDR89	2.02046e-23	-0.0633259	0.053	0.11	4.04072e-19
EML4	2.06693e-23	-0.0977576	0.311	0.423	4.13365e-19
DDX18	2.12106e-23	-0.0887167	0.265	0.37	4.24191e-19
ADAM17	2.12864e-23	-0.0627241	0.062	0.122	4.25706e-19
RRP1B	2.14598e-23	-0.085209	0.203	0.3	4.29174e-19
GPBP1	2.20422e-23	-0.0852001	0.347	0.466	4.40821e-19
ITPR3	2.24032e-23	-0.0674626	0.087	0.157	4.48041e-19
METTL5	2.27569e-23	-0.0619136	0.073	0.137	4.55116e-19
UXT	2.36497e-23	-0.0778074	0.197	0.294	4.72971e-19
PDHA1	2.36612e-23	-0.0620976	0.086	0.155	4.732e-19
PDE4DIP	2.66423e-23	-0.0971544	0.193	0.286	5.3282e-19
SNHG14	2.75654e-23	-0.071221	0.105	0.18	5.5128e-19
PSMB9	2.77502e-23	-0.0810771	0.261	0.368	5.54976e-19
CNOT2	2.82215e-23	-0.0784938	0.184	0.277	5.64402e-19
SUMO3	2.87843e-23	-0.0659887	0.114	0.192	5.75658e-19
ROCK2	2.9002e-23	-0.0867801	0.112	0.188	5.80011e-19
TRIB2	2.9238e-23	-0.115849	0.327	0.44	5.8473e-19
MRPL32	2.96379e-23	-0.0576323	0.071	0.135	5.92728e-19
OCIAD2	3.09904e-23	-0.0687344	0.137	0.22	6.19777e-19
NDUFB10	3.21181e-23	-0.0668464	0.166	0.257	6.4233e-19
ACTB	3.34152e-23	0.173968	0.708	0.697	6.68271e-19
OCIAD1	3.71695e-23	-0.0784892	0.179	0.27	7.43353e-19
HMGN3	4.07732e-23	-0.0573043	0.059	0.118	8.15423e-19
AP2A2	4.23874e-23	-0.06377	0.07	0.133	8.47705e-19
CEP85L	4.26378e-23	-0.0998735	0.244	0.345	8.52713e-19
CAPN2	4.31831e-23	-0.0800812	0.318	0.438	8.63619e-19
DCTN3	4.38077e-23	-0.0600774	0.073	0.138	8.76111e-19
NDUFA2	4.64213e-23	-0.0597633	0.091	0.161	9.2838e-19
LDLR	4.66935e-23	-0.0755054	0.07	0.133	9.33824e-19
DPM1	5.02775e-23	-0.0545821	0.057	0.115	1.0055e-18
INPP4B	5.06697e-23	-0.10178	0.309	0.417	1.01334e-18
CSNK1D	5.10588e-23	-0.0825211	0.172	0.261	1.02113e-18
POLR2H	5.13226e-23	-0.0580227	0.065	0.126	1.0264e-18
AK2	5.15831e-23	-0.0638541	0.109	0.185	1.03161e-18
POLR1E	5.40282e-23	-0.0596764	0.074	0.139	1.08051e-18
ING3	5.5174e-23	-0.0640669	0.08	0.146	1.10342e-18
NOL10	5.53733e-23	-0.0552844	0.054	0.111	1.10741e-18
CWC27	6.47481e-23	-0.0663658	0.087	0.155	1.2949e-18
LTV1	6.63037e-23	-0.0770023	0.112	0.187	1.32601e-18
SNRPA1	6.73963e-23	-0.0639431	0.093	0.164	1.34786e-18
EZR	6.8022e-23	-0.118882	0.453	0.571	1.36037e-18
RANGAP1	6.84256e-23	-0.0659702	0.094	0.165	1.36844e-18
CDC16	6.98915e-23	-0.0749618	0.142	0.225	1.39776e-18
LETMD1	7.24061e-23	-0.0596137	0.078	0.144	1.44805e-18
PARL	7.55066e-23	-0.0584563	0.067	0.129	1.51006e-18
ARHGAP12	7.78466e-23	-0.070211	0.087	0.155	1.55685e-18
GLG1	8.03678e-23	-0.0909663	0.458	0.589	1.60728e-18
LLPH	8.06695e-23	-0.0511598	0.048	0.102	1.61331e-18
ZFAND5	8.11697e-23	-0.0775392	0.192	0.286	1.62331e-18
DCAF6	8.12554e-23	-0.0537165	0.058	0.117	1.62503e-18
DIS3	9.11246e-23	-0.0727295	0.138	0.22	1.8224e-18
CEP68	9.16454e-23	-0.0677818	0.098	0.169	1.83282e-18
KDM3A	9.20332e-23	-0.0760109	0.194	0.289	1.84057e-18
PPP2R5C	9.31107e-23	-0.0795993	0.383	0.51	1.86212e-18
KANSL3	9.39823e-23	-0.0600038	0.079	0.145	1.87955e-18
BZW2	9.41818e-23	-0.0575982	0.07	0.133	1.88354e-18
KDSR	9.47014e-23	-0.0746482	0.133	0.214	1.89393e-18
STK17B	1.05053e-22	-0.121085	0.689	0.806	2.10096e-18
PAFAH1B1	1.05677e-22	-0.0747121	0.229	0.331	2.11344e-18
PIN1	1.08385e-22	-0.0629462	0.084	0.151	2.1676e-18
PDXK	1.0839e-22	-0.060564	0.073	0.136	2.16768e-18
UPF1	1.12424e-22	-0.0729969	0.112	0.187	2.24837e-18
TRIM52	1.13799e-22	-0.0703099	0.089	0.158	2.27586e-18
SOD2	1.17749e-22	-0.0786363	0.199	0.293	2.35486e-18
RBM3	1.23305e-22	-0.0831952	0.389	0.517	2.46598e-18
C19orf66	1.23752e-22	-0.0616569	0.091	0.16	2.47491e-18
UBXN6	1.28209e-22	-0.0589511	0.071	0.134	2.56405e-18
ZMAT1	1.39806e-22	-0.0755184	0.075	0.138	2.79597e-18
RBM27	1.40248e-22	-0.0859708	0.24	0.341	2.80482e-18
AKR1B1	1.49041e-22	-0.061898	0.082	0.148	2.98066e-18
DPY30	1.53377e-22	-0.056951	0.067	0.128	3.06738e-18
CHMP1A	1.56999e-22	-0.0512512	0.049	0.103	3.13983e-18
ENO1	1.59947e-22	-0.0944403	0.521	0.656	3.19877e-18
CD3D	1.62512e-22	-0.106791	0.538	0.671	3.25008e-18
LRPAP1	1.63691e-22	-0.0655222	0.119	0.197	3.27365e-18
HSD17B10	1.70187e-22	-0.0561964	0.069	0.131	3.40357e-18
RIF1	1.74099e-22	-0.0961225	0.225	0.321	3.48181e-18
UFM1	1.76872e-22	-0.0661735	0.167	0.256	3.53725e-18
GSPT1	1.77329e-22	-0.0891664	0.285	0.39	3.5464e-18
EIF3D	1.78628e-22	-0.0767181	0.325	0.442	3.57238e-18
WRNIP1	1.94033e-22	-0.0645069	0.088	0.156	3.88046e-18
VAT1	1.96777e-22	-0.0573171	0.056	0.113	3.93534e-18
PCED1B-AS1	2.03817e-22	-0.0898055	0.406	0.531	4.07614e-18
AKTIP	2.07526e-22	-0.0549746	0.061	0.12	4.15031e-18
DENND6A	2.08335e-22	-0.0653065	0.112	0.187	4.16649e-18
CCT7	2.13094e-22	-0.0788624	0.216	0.312	4.26167e-18
UBE2Q1	2.17303e-22	-0.0725554	0.19	0.283	4.34584e-18
SNRK	2.21776e-22	-0.0746823	0.249	0.353	4.4353e-18
CNOT8	2.22555e-22	-0.0720968	0.111	0.185	4.45088e-18
MRPL14	2.23468e-22	-0.0588563	0.074	0.137	4.46913e-18
TSTA3	2.31811e-22	-0.0519445	0.051	0.106	4.63598e-18
ISY1	2.40216e-22	-0.0591756	0.063	0.122	4.80409e-18
COX7A2L	2.57634e-22	-0.0706944	0.133	0.212	5.15243e-18
GRPEL1	2.64007e-22	-0.0610066	0.087	0.155	5.27987e-18
INSIG1	2.68682e-22	-0.0591747	0.064	0.124	5.37338e-18
PPP4R2	2.71383e-22	-0.0685932	0.139	0.221	5.42739e-18
SLC2A4RG	2.72499e-22	-0.0600809	0.084	0.15	5.44971e-18
SMAD2	2.75942e-22	-0.0673642	0.123	0.201	5.51856e-18
MGAT1	2.79643e-22	-0.0683856	0.122	0.199	5.59257e-18
RAPGEF6	2.89333e-22	-0.0585227	0.1	0.172	5.78636e-18
SSNA1	2.9103e-22	-0.0617578	0.093	0.163	5.82032e-18
KIF13B	2.91124e-22	-0.0639839	0.053	0.107	5.8222e-18
C1orf43	2.93394e-22	-0.0667495	0.124	0.203	5.86759e-18
TMX3	3.0271e-22	-0.0672477	0.101	0.173	6.05389e-18
PRDX3	3.03425e-22	-0.0507854	0.055	0.111	6.06819e-18
SAP18	3.30979e-22	-0.0794518	0.26	0.364	6.61925e-18
RBMX	3.31017e-22	-0.0792771	0.331	0.448	6.62001e-18
LIMD2	3.51663e-22	-0.0734305	0.165	0.252	7.03291e-18
TMEM167B	3.55629e-22	-0.0584739	0.091	0.16	7.11222e-18
MPI	3.56115e-22	-0.056312	0.065	0.124	7.12194e-18
NGDN	3.67834e-22	-0.063502	0.086	0.152	7.35631e-18
ITPR2	3.79264e-22	-0.103224	0.163	0.247	7.5849e-18
YTHDC1	3.89642e-22	-0.0919228	0.302	0.412	7.79244e-18
CFDP1	3.98612e-22	-0.0648781	0.073	0.136	7.97184e-18
BEX2	4.10782e-22	-0.0666754	0.093	0.161	8.21523e-18
ITPA	4.14294e-22	-0.0522474	0.063	0.122	8.28546e-18
SYNCRIP	4.31076e-22	-0.0826151	0.351	0.468	8.6211e-18
C7orf50	4.70189e-22	-0.0551788	0.052	0.106	9.40331e-18
LMO7	4.71509e-22	-0.066891	0.068	0.129	9.42971e-18
MRPS5	4.737e-22	-0.0802211	0.145	0.227	9.47353e-18
PPIL2	4.77186e-22	-0.058026	0.055	0.111	9.54323e-18
RAB1A	5.21105e-22	-0.0627202	0.097	0.168	1.04216e-17
COLGALT1	5.40045e-22	-0.0515403	0.061	0.119	1.08004e-17
FAM172A	5.40606e-22	-0.0609234	0.075	0.138	1.08116e-17
CHMP7	5.43797e-22	-0.0716852	0.18	0.271	1.08754e-17
ATAD2B	5.95693e-22	-0.0788175	0.093	0.16	1.19133e-17
CCDC69	6.04292e-22	-0.0838181	0.295	0.404	1.20852e-17
DNAJC19	6.06018e-22	-0.0570405	0.063	0.122	1.21198e-17
C19orf12	6.14227e-22	-0.0544489	0.07	0.131	1.22839e-17
INADL	6.32908e-22	-0.100793	0.172	0.257	1.26575e-17
RAP2C	6.33182e-22	-0.0586674	0.076	0.14	1.2663e-17
NABP1	7.4665e-22	-0.068281	0.085	0.151	1.49323e-17
POLR2K	7.659e-22	-0.052493	0.057	0.113	1.53172e-17
SMC3	8.03574e-22	-0.100108	0.257	0.356	1.60707e-17
UHRF2	8.26553e-22	-0.0747411	0.124	0.2	1.65302e-17
RAD50	8.5533e-22	-0.0947863	0.174	0.259	1.71057e-17
PSPC1	8.64132e-22	-0.069455	0.124	0.201	1.72818e-17
SAMM50	9.37686e-22	-0.0510614	0.056	0.112	1.87528e-17
CDC73	9.97697e-22	-0.0667751	0.123	0.199	1.99529e-17
URM1	1.04816e-21	-0.0497629	0.05	0.103	2.09621e-17
GOPC	1.06033e-21	-0.0743499	0.128	0.205	2.12055e-17
AEBP2	1.09514e-21	-0.0745223	0.103	0.173	2.19018e-17
CIB1	1.17287e-21	-0.0677726	0.212	0.309	2.34563e-17
SS18L2	1.19825e-21	-0.0522102	0.058	0.115	2.39638e-17
TOPORS	1.21271e-21	-0.0715358	0.095	0.164	2.4253e-17
CTBP1	1.24628e-21	-0.0620367	0.17	0.258	2.49244e-17
IBTK	1.29346e-21	-0.073943	0.131	0.209	2.58679e-17
CYLD	1.32888e-21	-0.140034	0.676	0.788	2.65762e-17
ABCD4	1.33452e-21	-0.0495146	0.053	0.107	2.6689e-17
ST6GAL1	1.37933e-21	-0.0766716	0.247	0.347	2.75852e-17
SMG1	1.43934e-21	0.152094	0.447	0.371	2.87854e-17
MSI2	1.43979e-21	-0.0812638	0.205	0.298	2.87944e-17
NDUFB9	1.44474e-21	-0.0656069	0.172	0.26	2.88934e-17
METTL23	1.44758e-21	-0.0543829	0.07	0.132	2.89501e-17
FBXO11	1.45781e-21	-0.0751069	0.129	0.205	2.91548e-17
ACAA2	1.47128e-21	-0.0542316	0.064	0.123	2.94242e-17
TNK2	1.48001e-21	-0.0568622	0.067	0.127	2.95987e-17
ARHGAP15	1.61482e-21	-0.0773218	0.228	0.325	3.22948e-17
OSTC	1.63291e-21	-0.0550859	0.06	0.117	3.26565e-17
EMD	1.63559e-21	-0.0501613	0.057	0.112	3.27102e-17
SLC12A9	1.77099e-21	-0.0672278	0.091	0.158	3.5418e-17
FAM73B	1.82358e-21	-0.0518265	0.052	0.105	3.64697e-17
OXCT1	1.91963e-21	-0.0658483	0.098	0.168	3.83907e-17
ENY2	2.1172e-21	-0.0587811	0.089	0.156	4.23418e-17
POLR3GL	2.14224e-21	-0.0732997	0.163	0.248	4.28426e-17
TSTD1	2.18058e-21	-0.0622171	0.117	0.192	4.36094e-17
PPP4C	2.1846e-21	-0.0614877	0.093	0.16	4.36898e-17
IARS2	2.23496e-21	-0.0736419	0.137	0.215	4.46969e-17
TNFRSF10A	2.24364e-21	-0.0659789	0.109	0.181	4.48705e-17
CCNDBP1	2.26145e-21	-0.0622755	0.109	0.182	4.52267e-17
ATF4	2.26183e-21	-0.13315	0.404	0.503	4.52344e-17
PARP1	2.29351e-21	-0.0932309	0.326	0.434	4.58679e-17
ALG13	2.30728e-21	-0.0548514	0.071	0.132	4.61433e-17
BCLAF1	2.4224e-21	-0.0932364	0.394	0.509	4.84456e-17
TBRG1	2.50332e-21	-0.0749553	0.107	0.178	5.00639e-17
BABAM1	2.53277e-21	-0.0534107	0.066	0.124	5.06529e-17
COG1	2.84545e-21	-0.0486611	0.054	0.108	5.69062e-17
TSR1	2.89686e-21	-0.0692554	0.093	0.159	5.79344e-17
HNRNPH3	3.09876e-21	-0.0781051	0.308	0.416	6.19721e-17
HCG18	3.18204e-21	-0.0728171	0.121	0.196	6.36377e-17
AKAP8	3.23469e-21	-0.073696	0.125	0.201	6.46905e-17
KLRB1	3.31692e-21	-0.0810951	0.066	0.124	6.6335e-17
MYO1G	3.37814e-21	-0.0775271	0.152	0.234	6.75595e-17
INTS10	3.39238e-21	-0.0722987	0.158	0.241	6.78442e-17
SREK1	3.55809e-21	-0.078684	0.199	0.292	7.11582e-17
ZDHHC18	3.62594e-21	-0.0522288	0.062	0.119	7.25152e-17
DNTTIP2	3.67128e-21	-0.0858983	0.241	0.336	7.3422e-17
NIN	3.68293e-21	-0.0989726	0.386	0.504	7.36549e-17
RTF1	3.79799e-21	-0.0832873	0.222	0.316	7.59561e-17
RIC8A	3.92183e-21	-0.0572908	0.082	0.147	7.84327e-17
ARHGAP25	3.95961e-21	-0.0794773	0.217	0.31	7.91883e-17
CHST11	3.99337e-21	-0.0617465	0.075	0.137	7.98634e-17
HERC3	4.00833e-21	-0.0574818	0.075	0.137	8.01626e-17
CFL1	4.21602e-21	-0.0897293	0.498	0.624	8.43161e-17
VEGFB	4.24053e-21	-0.0575117	0.076	0.138	8.48063e-17
AMICA1	4.6849e-21	-0.0685854	0.15	0.232	9.36933e-17
BRD8	5.14077e-21	-0.0637246	0.107	0.178	1.0281e-16
RECQL	5.17434e-21	-0.0736805	0.162	0.245	1.03482e-16
TMEM160	5.22715e-21	-0.0584711	0.09	0.156	1.04538e-16
IKBKAP	5.28421e-21	-0.0627746	0.09	0.156	1.05679e-16
CCS	5.4127e-21	-0.0525397	0.055	0.11	1.08249e-16
AIMP1	5.4618e-21	-0.0671966	0.135	0.212	1.09231e-16
SUMO1	5.59479e-21	-0.05451	0.07	0.13	1.1189e-16
C7orf55-LUC7L2	5.59673e-21	-0.0586471	0.102	0.172	1.11929e-16
ILF3-AS1	5.70491e-21	-0.0702233	0.106	0.176	1.14092e-16
TRIM28	5.70708e-21	-0.0631195	0.117	0.19	1.14136e-16
POLR3E	5.80077e-21	-0.05616	0.067	0.126	1.1601e-16
TRMT2A	5.9779e-21	-0.0549802	0.056	0.111	1.19552e-16
PDCD6	6.08383e-21	-0.0687248	0.126	0.2	1.2167e-16
DNMT3A	6.1804e-21	-0.0769246	0.182	0.269	1.23602e-16
TMEM123	6.20002e-21	-0.11745	0.717	0.818	1.23994e-16
BICD2	6.43248e-21	-0.0650926	0.109	0.18	1.28643e-16
SMARCA2	6.51255e-21	-0.0939285	0.375	0.487	1.30244e-16
WDR13	6.67727e-21	-0.0486992	0.05	0.103	1.33539e-16
TMED7	6.71987e-21	-0.0515974	0.053	0.106	1.34391e-16
2020-03-07	6.72357e-21	-0.0802921	0.213	0.305	1.34465e-16
PTDSS1	6.90622e-21	-0.0646682	0.129	0.205	1.38117e-16
CAST	7.03518e-21	-0.083642	0.283	0.384	1.40697e-16
ELOF1	7.26856e-21	-0.0526194	0.052	0.104	1.45364e-16
MYEOV2	7.45086e-21	-0.0637989	0.142	0.221	1.4901e-16
NDUFA9	7.4641e-21	-0.0476898	0.05	0.102	1.49275e-16
RNF7	7.81299e-21	-0.060974	0.11	0.181	1.56252e-16
ZCCHC7	8.01166e-21	-0.0669781	0.088	0.152	1.60225e-16
DZIP3	8.25124e-21	-0.0621106	0.06	0.116	1.65017e-16
NBEAL2	8.65436e-21	-0.0614087	0.099	0.168	1.73079e-16
USP25	9.02594e-21	-0.0695192	0.131	0.207	1.8051e-16
ERGIC2	9.15602e-21	-0.0723235	0.12	0.193	1.83111e-16
SGTB	9.17958e-21	-0.0654655	0.116	0.189	1.83583e-16
ZFAND2B	9.63268e-21	-0.0621808	0.095	0.161	1.92644e-16
APLP2	9.65934e-21	-0.0739874	0.15	0.229	1.93177e-16
TRMT1	9.83617e-21	-0.0574477	0.074	0.135	1.96714e-16
ZFX	9.89248e-21	-0.0634907	0.094	0.161	1.9784e-16
ICAM3	1.00541e-20	-0.0736248	0.28	0.384	2.01072e-16
PRRC2C	1.02438e-20	-0.128557	0.706	0.82	2.04865e-16
WAC-AS1	1.0271e-20	-0.0659847	0.064	0.12	2.05409e-16
GNPDA1	1.04106e-20	-0.0576059	0.07	0.129	2.08201e-16
ECHDC2	1.04775e-20	-0.0687125	0.091	0.156	2.09539e-16
MAP4K1	1.06212e-20	-0.0626905	0.116	0.188	2.12414e-16
CCT3	1.06975e-20	-0.0800448	0.331	0.441	2.1394e-16
PDHB	1.07663e-20	-0.0568386	0.067	0.125	2.15316e-16
TARSL2	1.11196e-20	-0.0673787	0.092	0.157	2.22381e-16
ACAP1	1.11869e-20	-0.0881708	0.386	0.5	2.23727e-16
USP7	1.20168e-20	-0.0743932	0.371	0.492	2.40324e-16
ARRDC3	1.21388e-20	-0.094581	0.172	0.254	2.42764e-16
PNMA1	1.25294e-20	-0.0491885	0.051	0.103	2.50576e-16
PSTPIP1	1.27833e-20	-0.0587093	0.102	0.171	2.55654e-16
ZNF44	1.2924e-20	-0.0593197	0.058	0.113	2.58467e-16
GRAMD1A	1.30607e-20	-0.0553294	0.078	0.141	2.612e-16
POLR2G	1.44955e-20	-0.0549771	0.08	0.142	2.89895e-16
ZCCHC11	1.47241e-20	-0.0912697	0.247	0.341	2.94468e-16
CCDC104	1.48684e-20	-0.0538772	0.06	0.115	2.97352e-16
NUCB2	1.54742e-20	-0.0927125	0.232	0.323	3.09469e-16
OXA1L	1.54836e-20	-0.0656387	0.167	0.251	3.09657e-16
SMC6	1.58623e-20	-0.0744355	0.089	0.153	3.1723e-16
TRAM1	1.59365e-20	-0.0764087	0.271	0.371	3.18715e-16
TNFRSF10B	1.61145e-20	-0.0488791	0.05	0.102	3.22274e-16
CCDC82	1.61938e-20	-0.063643	0.109	0.179	3.2386e-16
GATAD1	1.65076e-20	-0.0534465	0.063	0.12	3.30136e-16
EBAG9	1.65141e-20	-0.0639923	0.086	0.15	3.30265e-16
MEPCE	1.75202e-20	-0.0545821	0.058	0.112	3.50386e-16
IMPDH2	1.77612e-20	-0.0589082	0.108	0.178	3.55207e-16
CSPP1	1.80706e-20	-0.065611	0.069	0.128	3.61395e-16
SFMBT1	1.95904e-20	-0.0639131	0.074	0.134	3.91788e-16
ARMCX3	1.96378e-20	-0.0554845	0.052	0.105	3.92737e-16
IL4R	1.98528e-20	-0.0816474	0.217	0.31	3.97035e-16
GIGYF1	1.99813e-20	-0.0631137	0.103	0.171	3.99607e-16
SKIV2L2	2.00255e-20	-0.0727938	0.097	0.163	4.00491e-16
STX10	2.0739e-20	-0.0543075	0.084	0.147	4.1476e-16
WDR3	2.07893e-20	-0.0667144	0.087	0.151	4.15765e-16
XRN2	2.09152e-20	-0.0836208	0.309	0.413	4.18283e-16
SZRD1	2.3492e-20	-0.0612058	0.126	0.201	4.69816e-16
C19orf70	2.49047e-20	-0.0568094	0.082	0.144	4.98069e-16
ERCC6L2	2.51505e-20	-0.0687927	0.118	0.19	5.02985e-16
BCL7C	2.5629e-20	-0.0489284	0.052	0.104	5.12554e-16
UBE2D2	2.60341e-20	-0.0732071	0.212	0.303	5.20657e-16
CLDND1	2.63065e-20	-0.0556913	0.07	0.129	5.26104e-16
COPS2	2.68445e-20	-0.060145	0.128	0.203	5.36863e-16
BSDC1	2.74958e-20	-0.055035	0.067	0.125	5.49888e-16
UNC45A	2.77699e-20	-0.0548886	0.061	0.116	5.5537e-16
ITGB1BP1	2.80247e-20	-0.0597368	0.1	0.167	5.60466e-16
BCL2L11	2.88102e-20	-0.085427	0.079	0.14	5.76175e-16
AP4B1	2.97383e-20	-0.0491427	0.054	0.107	5.94735e-16
YME1L1	2.99514e-20	-0.0809938	0.32	0.426	5.98999e-16
AKR1A1	3.14527e-20	-0.0510717	0.081	0.144	6.29022e-16
HMGN2	3.14628e-20	0.113518	0.258	0.18	6.29225e-16
EAF1	3.26906e-20	-0.050902	0.05	0.101	6.53779e-16
NUP210	3.31852e-20	-0.0645275	0.186	0.274	6.6367e-16
SPG7	3.36734e-20	-0.0659755	0.105	0.173	6.73434e-16
APMAP	3.51643e-20	-0.0556717	0.079	0.14	7.0325e-16
VCP	3.56147e-20	-0.0802661	0.29	0.393	7.12258e-16
SEC61G	3.58718e-20	-0.0513603	0.061	0.116	7.17401e-16
ZNF622	3.77501e-20	-0.0619165	0.095	0.162	7.54964e-16
COG3	4.01692e-20	-0.0550733	0.067	0.124	8.03344e-16
KDM2A	4.13293e-20	-0.0846194	0.302	0.406	8.26544e-16
FAM214A	4.21643e-20	-0.0579509	0.095	0.161	8.43244e-16
CTDSP1	4.24667e-20	-0.0623669	0.126	0.2	8.49292e-16
ZFC3H1	4.63053e-20	-0.0998718	0.236	0.325	9.26059e-16
PHYKPL	4.75058e-20	-0.0663207	0.128	0.201	9.50069e-16
C1orf52	4.79876e-20	-0.0486106	0.063	0.12	9.59704e-16
SLC38A1	4.84504e-20	-0.123191	0.626	0.734	9.68961e-16
IRAK1	4.85871e-20	-0.0699701	0.127	0.2	9.71694e-16
DENND2D	4.87168e-20	-0.0780189	0.216	0.306	9.74288e-16
MRPL33	4.90496e-20	-0.049048	0.055	0.108	9.80942e-16
KCMF1	5.08329e-20	-0.0564632	0.1	0.168	1.01661e-15
SNHG8	5.17974e-20	-0.0623306	0.184	0.272	1.0359e-15
COA5	5.20165e-20	-0.048886	0.053	0.106	1.04028e-15
VAMP4	5.22501e-20	-0.0576285	0.069	0.127	1.04495e-15
CROCCP2	5.3303e-20	-0.0597161	0.07	0.128	1.06601e-15
SEC61B	5.46468e-20	-0.0576877	0.09	0.154	1.09288e-15
PLEKHA1	5.47262e-20	-0.0680674	0.111	0.18	1.09447e-15
C12orf23	5.55769e-20	-0.0586116	0.091	0.155	1.11148e-15
PKN2	5.89073e-20	-0.0567137	0.097	0.164	1.17809e-15
FKBP2	5.97328e-20	-0.0534101	0.07	0.128	1.1946e-15
CREBZF	6.19605e-20	-0.0721408	0.106	0.174	1.23915e-15
PPP2R2A	6.48805e-20	-0.0643685	0.106	0.175	1.29755e-15
GTF3C6	6.49147e-20	-0.0554399	0.076	0.136	1.29823e-15
USP8	6.5687e-20	-0.0858979	0.142	0.216	1.31367e-15
ALDH9A1	6.59208e-20	-0.0630038	0.094	0.159	1.31835e-15
UBA1	6.64143e-20	-0.0620433	0.123	0.197	1.32822e-15
MEA1	6.8798e-20	-0.0509229	0.059	0.112	1.37589e-15
TNRC6C	6.95329e-20	-0.0862113	0.207	0.296	1.39059e-15
ZFAND1	7.03359e-20	-0.0493629	0.064	0.12	1.40665e-15
ARIH2	8.01915e-20	-0.0650849	0.177	0.262	1.60375e-15
CSGALNACT2	8.21593e-20	-0.0653904	0.123	0.195	1.6431e-15
DHX15	8.39977e-20	-0.0613739	0.169	0.253	1.67987e-15
GTF3C5	8.42979e-20	-0.0533901	0.064	0.119	1.68587e-15
METTL16	8.64183e-20	-0.0721114	0.117	0.187	1.72828e-15
THAP11	8.93549e-20	-0.0554326	0.092	0.156	1.78701e-15
CMPK1	8.96836e-20	-0.0715254	0.227	0.32	1.79358e-15
MRPL51	9.27896e-20	-0.0577575	0.094	0.159	1.8557e-15
GIMAP8	9.36416e-20	-0.0947804	0.169	0.248	1.87274e-15
FAM168B	9.43516e-20	-0.0666509	0.14	0.217	1.88694e-15
ARL8B	9.58917e-20	-0.0640191	0.106	0.174	1.91774e-15
SRP68	9.70265e-20	-0.063468	0.108	0.177	1.94043e-15
SMIM11	1.16006e-19	-0.0491613	0.05	0.101	2.32001e-15
EIF3I	1.17884e-19	-0.0612129	0.16	0.241	2.35757e-15
CAMLG	1.18191e-19	-0.0689357	0.168	0.249	2.3637e-15
CDC123	1.24462e-19	-0.053989	0.09	0.154	2.48911e-15
THUMPD3	1.3064e-19	-0.0590622	0.076	0.134	2.61266e-15
SYTL3	1.32351e-19	-0.0540519	0.067	0.123	2.64689e-15
VPS4B	1.37745e-19	-0.0643715	0.151	0.23	2.75476e-15
ADCK3	1.42403e-19	-0.0484584	0.059	0.113	2.84792e-15
PSMG4	1.45739e-19	-0.0480458	0.051	0.102	2.91464e-15
KIAA1468	1.49633e-19	-0.0555326	0.07	0.127	2.9925e-15
MKL1	1.52848e-19	-0.0498824	0.054	0.105	3.05681e-15
IFNAR1	1.52941e-19	-0.0733636	0.191	0.277	3.05867e-15
RRM1	1.53178e-19	-0.0474404	0.061	0.115	3.0634e-15
APEX1	1.56828e-19	-0.0654316	0.19	0.277	3.13641e-15
ACBD6	1.61079e-19	-0.0654115	0.079	0.139	3.22142e-15
CD2BP2	1.72548e-19	-0.0551876	0.074	0.132	3.45079e-15
ZC3H7A	1.84488e-19	-0.0688388	0.163	0.243	3.68958e-15
FAM134C	1.85837e-19	-0.0575769	0.14	0.216	3.71655e-15
MRPS16	1.89415e-19	-0.0483605	0.065	0.121	3.7881e-15
DDX24	2.1554e-19	-0.0817049	0.365	0.475	4.31058e-15
MYLIP	2.18424e-19	-0.0915565	0.247	0.338	4.36826e-15
ZMYM5	2.2352e-19	-0.0588394	0.066	0.121	4.47017e-15
ABHD14B	2.23738e-19	-0.0518317	0.083	0.145	4.47453e-15
GPX1	2.34151e-19	-0.062543	0.12	0.191	4.68279e-15
DEGS1	2.44081e-19	-0.0503088	0.08	0.14	4.88138e-15
DGUOK	2.5031e-19	-0.0503023	0.061	0.116	5.00595e-15
PSMD13	2.59697e-19	-0.0654344	0.138	0.212	5.19369e-15
CTSS	2.63551e-19	-0.0748197	0.281	0.381	5.27076e-15
METTL14	2.64433e-19	-0.0491427	0.053	0.104	5.28839e-15
FAM13B	2.80654e-19	-0.0715295	0.124	0.195	5.6128e-15
UBL3	2.82165e-19	-0.0634691	0.117	0.187	5.64302e-15
RICTOR	2.96582e-19	-0.0692585	0.19	0.276	5.93134e-15
NCK1	3.38127e-19	-0.0552706	0.071	0.127	6.7622e-15
CXXC1	3.47004e-19	-0.0649464	0.111	0.179	6.93973e-15
LAPTM4A	3.53202e-19	-0.0524759	0.085	0.147	7.06369e-15
C16orf72	3.73222e-19	-0.0544007	0.098	0.163	7.46407e-15
SNAP23	3.7335e-19	-0.0570241	0.084	0.145	7.46663e-15
BRD3	3.76803e-19	-0.0680066	0.113	0.181	7.53567e-15
TNFAIP8	3.7736e-19	-0.0825706	0.393	0.509	7.54682e-15
SAMHD1	3.81112e-19	-0.1021	0.613	0.733	7.62186e-15
AP1S2	3.81557e-19	-0.0491913	0.056	0.108	7.63075e-15
RNGTT	3.88749e-19	-0.0575719	0.071	0.128	7.77458e-15
TNFRSF14	3.88902e-19	-0.0611006	0.187	0.273	7.77765e-15
EIF5A	3.88922e-19	-0.0619028	0.139	0.214	7.77805e-15
MCM7	3.94236e-19	-0.0589246	0.115	0.184	7.88432e-15
OAS3	3.99851e-19	0.126039	0.161	0.098	7.99663e-15
EGLN2	4.15514e-19	-0.0585664	0.098	0.162	8.30987e-15
EIF2D	4.38474e-19	-0.060099	0.09	0.152	8.76905e-15
LIMS1	4.50273e-19	-0.0830453	0.188	0.271	9.00501e-15
ZNF274	4.54929e-19	-0.0510774	0.069	0.125	9.09813e-15
NDUFA11	4.60038e-19	-0.0486802	0.067	0.123	9.20029e-15
TCF25	4.80767e-19	-0.0737675	0.221	0.311	9.61487e-15
ZBTB10	4.82569e-19	-0.0767792	0.115	0.183	9.6509e-15
DDX55	4.89955e-19	-0.0574644	0.082	0.142	9.79861e-15
MAPK8IP3	4.93589e-19	-0.0586513	0.075	0.132	9.87129e-15
RGS14	5.22053e-19	-0.062899	0.101	0.166	1.04405e-14
HSP90B1	5.25898e-19	-0.114908	0.548	0.67	1.05174e-14
HIPK1	5.48551e-19	-0.0845034	0.23	0.317	1.09705e-14
HIAT1	5.51181e-19	-0.0583667	0.117	0.187	1.10231e-14
TXN	5.63689e-19	-0.0539882	0.085	0.146	1.12732e-14
HIST1H1E	5.64375e-19	0.116316	0.229	0.155	1.12869e-14
ELOVL5	5.731e-19	-0.0626981	0.163	0.244	1.14614e-14
ADSS	5.77996e-19	-0.061452	0.122	0.192	1.15593e-14
PSMA3	5.80968e-19	-0.0607218	0.123	0.194	1.16188e-14
HLA-E	5.83738e-19	-0.0788091	0.991	0.99	1.16742e-14
STX16	6.02342e-19	-0.0732718	0.305	0.408	1.20462e-14
WDR45B	6.0785e-19	-0.048878	0.07	0.126	1.21564e-14
PCSK7	6.12737e-19	-0.0776715	0.21	0.298	1.22541e-14
MBD3	6.13166e-19	-0.0484499	0.056	0.107	1.22627e-14
AP2M1	6.16989e-19	-0.0607363	0.196	0.283	1.23392e-14
VPRBP	6.19899e-19	-0.0644812	0.089	0.15	1.23974e-14
TMED3	6.76901e-19	-0.0521478	0.055	0.106	1.35373e-14
PSD4	7.25867e-19	-0.0648452	0.167	0.247	1.45166e-14
DDX42	7.52054e-19	-0.0726748	0.264	0.361	1.50403e-14
COX8A	7.54005e-19	-0.0598501	0.115	0.183	1.50793e-14
EIF1	7.58056e-19	-0.185566	0.751	0.814	1.51604e-14
OXR1	7.8121e-19	-0.0611429	0.089	0.151	1.56234e-14
OAS2	7.88085e-19	0.138357	0.242	0.172	1.57609e-14
FAM204A	7.97422e-19	-0.0613465	0.114	0.182	1.59476e-14
CCDC91	8.22766e-19	-0.0728665	0.142	0.215	1.64545e-14
NR1D2	8.43906e-19	-0.0684571	0.164	0.243	1.68773e-14
NSMCE4A	8.58901e-19	-0.0586116	0.092	0.155	1.71772e-14
ERLEC1	8.61357e-19	-0.0612336	0.096	0.159	1.72263e-14
USP1	8.64841e-19	-0.071784	0.181	0.263	1.7296e-14
SRPK1	8.68643e-19	-0.0577511	0.105	0.172	1.7372e-14
LRRFIP1	8.75878e-19	-0.0907012	0.506	0.623	1.75167e-14
STK39	8.77475e-19	-0.0558056	0.062	0.115	1.75486e-14
UBE2H	8.83187e-19	-0.0633874	0.161	0.24	1.76629e-14
PWP1	9.02242e-19	-0.0626695	0.104	0.169	1.80439e-14
OS9	9.33476e-19	-0.063366	0.172	0.253	1.86686e-14
UBE2J2	9.33883e-19	-0.0547313	0.093	0.155	1.86767e-14
SPCS1	9.43505e-19	-0.0631807	0.151	0.227	1.88692e-14
CD226	9.44365e-19	-0.0545822	0.078	0.137	1.88863e-14
FBRS	9.71027e-19	-0.0528091	0.086	0.147	1.94196e-14
DKC1	9.73118e-19	-0.0737098	0.141	0.213	1.94614e-14
ZNF24	9.81008e-19	-0.0761992	0.265	0.359	1.96192e-14
STAG2	9.86915e-19	-0.0821269	0.353	0.457	1.97373e-14
MGEA5	1.00984e-18	-0.0994604	0.44	0.553	2.01959e-14
GGA1	1.03275e-18	-0.0567323	0.068	0.123	2.0654e-14
RAB11FIP1	1.03614e-18	-0.0649981	0.099	0.163	2.07218e-14
PLEKHA2	1.04412e-18	-0.0704791	0.16	0.237	2.08814e-14
SLC39A10	1.09283e-18	-0.0710177	0.111	0.178	2.18556e-14
SAP30BP	1.11013e-18	-0.0625709	0.12	0.19	2.22016e-14
SHKBP1	1.14266e-18	-0.0527839	0.078	0.137	2.2852e-14
TBRG4	1.18964e-18	-0.0503023	0.06	0.112	2.37915e-14
NDUFS5	1.20314e-18	-0.0689459	0.191	0.273	2.40616e-14
RBM26	1.24259e-18	-0.0723478	0.282	0.382	2.48506e-14
PSMD4	1.33003e-18	-0.0559585	0.154	0.232	2.65992e-14
HTATIP2	1.352e-18	-0.050486	0.062	0.115	2.70387e-14
RRP1	1.45617e-18	-0.0454647	0.056	0.107	2.9122e-14
DFFA	1.60479e-18	-0.060958	0.093	0.155	3.20942e-14
PSMC3	1.61311e-18	-0.0576135	0.115	0.183	3.22606e-14
EXOSC8	1.62715e-18	-0.0533128	0.075	0.131	3.25415e-14
NDEL1	1.63932e-18	-0.0517407	0.067	0.122	3.27849e-14
ARL5A	1.65038e-18	-0.0632735	0.122	0.191	3.3006e-14
PIBF1	1.67929e-18	-0.057939	0.074	0.129	3.35842e-14
REST	1.70621e-18	-0.0933679	0.289	0.381	3.41224e-14
CBR1	1.71372e-18	-0.046625	0.06	0.112	3.42728e-14
CLIP1	1.7475e-18	-0.0818629	0.218	0.304	3.49482e-14
SFXN1	1.77944e-18	-0.0642634	0.149	0.224	3.55871e-14
L3MBTL3	1.83558e-18	-0.0653986	0.095	0.157	3.67098e-14
STRAP	1.88233e-18	-0.0546905	0.117	0.185	3.76448e-14
TMEM50B	1.91963e-18	-0.0599658	0.114	0.182	3.83907e-14
MIB1	2.01682e-18	-0.0681365	0.119	0.187	4.03344e-14
CIAPIN1	2.09076e-18	-0.0468941	0.059	0.111	4.18131e-14
P4HTM	2.12031e-18	-0.0477127	0.056	0.106	4.24042e-14
AKIRIN1	2.23223e-18	-0.064211	0.236	0.328	4.46424e-14
MYCBP2	2.23748e-18	-0.120437	0.554	0.658	4.47473e-14
CNIH4	2.2388e-18	-0.0483721	0.061	0.113	4.47738e-14
TBCC	2.41887e-18	-0.0535024	0.072	0.127	4.8375e-14
APEH	2.45574e-18	-0.0544468	0.079	0.136	4.91124e-14
FAM111A	2.52352e-18	-0.0704894	0.163	0.241	5.04679e-14
SDHB	2.55889e-18	-0.0527019	0.086	0.146	5.11752e-14
SECISBP2	2.56685e-18	-0.0715206	0.21	0.296	5.13344e-14
DENR	2.9444e-18	-0.0626171	0.179	0.26	5.8885e-14
TIAM1	2.97084e-18	-0.0714045	0.162	0.24	5.94138e-14
AHCY	2.99472e-18	-0.0477241	0.06	0.112	5.98914e-14
VAMP5	3.0431e-18	-0.0505793	0.081	0.14	6.0859e-14
SENP7	3.04958e-18	-0.0657996	0.16	0.237	6.09885e-14
TMEM55B	3.20026e-18	-0.0485365	0.07	0.125	6.40021e-14
RFWD2	3.23617e-18	-0.051667	0.069	0.124	6.47201e-14
TMIGD2	3.24643e-18	-0.0560717	0.075	0.131	6.49253e-14
C16orf54	3.31495e-18	-0.0494249	0.074	0.13	6.62957e-14
CORO7	3.33918e-18	-0.0525662	0.085	0.144	6.67802e-14
GNPAT	3.37233e-18	-0.0514878	0.068	0.123	6.74432e-14
PRKAR1A	3.40788e-18	-0.05997	0.139	0.212	6.81542e-14
RAB8A	3.77454e-18	-0.0505122	0.082	0.141	7.5487e-14
SERBP1	4.025e-18	-0.0747788	0.406	0.521	8.04959e-14
JMJD6	4.08452e-18	-0.054612	0.074	0.129	8.16864e-14
ACBD3	4.16465e-18	-0.0630731	0.11	0.176	8.32888e-14
GAR1	4.17994e-18	-0.0461898	0.054	0.103	8.35945e-14
UBE4A	4.35026e-18	-0.0585518	0.12	0.189	8.70008e-14
KMT2E	4.42862e-18	-0.08484	0.487	0.597	8.85681e-14
C5orf45	4.49486e-18	-0.0483721	0.058	0.108	8.98928e-14
CES2	4.61318e-18	-0.0526951	0.064	0.117	9.22589e-14
WIPI2	4.66453e-18	-0.0584931	0.127	0.196	9.3286e-14
CHD7	4.71958e-18	-0.0779069	0.163	0.239	9.4387e-14
MZT2B	4.78916e-18	-0.0591276	0.177	0.257	9.57784e-14
UBE2R2	4.86665e-18	-0.0618226	0.168	0.246	9.73281e-14
CCDC12	4.88891e-18	-0.0530116	0.101	0.164	9.77732e-14
ASNS	4.91393e-18	-0.0498284	0.069	0.123	9.82736e-14
TINF2	4.99679e-18	-0.0519379	0.1	0.163	9.99308e-14
NISCH	5.00855e-18	-0.0587109	0.11	0.175	1.00166e-13
USP14	5.0173e-18	-0.0621496	0.137	0.208	1.00341e-13
VDAC3	5.07647e-18	-0.0563654	0.111	0.177	1.01524e-13
PDCD7	5.10544e-18	-0.0602474	0.117	0.184	1.02104e-13
SPPL2B	5.22381e-18	-0.0519757	0.061	0.112	1.04471e-13
IRAK4	5.36545e-18	-0.0650546	0.16	0.236	1.07304e-13
LDLRAD4	5.62941e-18	-0.0515181	0.059	0.11	1.12583e-13
ATR	5.7257e-18	-0.0652721	0.122	0.19	1.14508e-13
DCTD	5.91318e-18	-0.0517437	0.083	0.142	1.18258e-13
STOML2	5.99939e-18	-0.0500802	0.074	0.129	1.19982e-13
TMED2	6.07013e-18	-0.0548283	0.134	0.205	1.21396e-13
AFG3L2	6.07682e-18	-0.0586618	0.099	0.162	1.2153e-13
NDNL2	6.27708e-18	-0.0564391	0.1	0.162	1.25535e-13
TMEM59	6.4128e-18	-0.0584485	0.198	0.282	1.2825e-13
PPM1F	6.48031e-18	-0.0484584	0.057	0.107	1.296e-13
ATG4B	6.52381e-18	-0.046939	0.06	0.111	1.3047e-13
ADAM10	6.52844e-18	-0.0638278	0.232	0.323	1.30562e-13
TRMT10C	6.61174e-18	-0.0474218	0.058	0.108	1.32228e-13
IL2RA	6.87614e-18	-0.0666918	0.078	0.136	1.37516e-13
DDB1	7.08155e-18	-0.063937	0.18	0.26	1.41624e-13
GABARAPL2	7.43989e-18	-0.0583078	0.121	0.189	1.4879e-13
TSPYL1	7.52484e-18	-0.057565	0.115	0.182	1.50489e-13
CFLAR	7.61203e-18	-0.0790532	0.399	0.509	1.52233e-13
BLOC1S4	7.70283e-18	-0.0459835	0.069	0.123	1.54049e-13
SAE1	8.11065e-18	-0.051381	0.087	0.147	1.62205e-13
ACADVL	8.16944e-18	-0.068078	0.215	0.299	1.63381e-13
GNB5	8.59931e-18	-0.0519655	0.067	0.12	1.71978e-13
ANAPC7	8.67276e-18	-0.0498237	0.064	0.116	1.73447e-13
RINL	8.68745e-18	-0.0557139	0.098	0.16	1.7374e-13
RASSF3	8.73277e-18	-0.0614984	0.199	0.283	1.74647e-13
SMARCC1	8.88268e-18	-0.0804387	0.331	0.431	1.77645e-13
COX5A	8.89652e-18	-0.0538746	0.1	0.163	1.77922e-13
VAPB	8.89989e-18	-0.0534135	0.087	0.147	1.77989e-13
TMEM87B	8.93811e-18	-0.0503363	0.089	0.149	1.78753e-13
LDHA	9.03612e-18	-0.0807534	0.407	0.518	1.80713e-13
VDAC2	9.35787e-18	-0.0459831	0.063	0.115	1.87148e-13
PPP1R15B	9.3796e-18	-0.0762081	0.161	0.234	1.87583e-13
HNRNPC	9.603e-18	-0.0652123	0.49	0.617	1.9205e-13
ETV3	9.84e-18	-0.0516573	0.077	0.133	1.9679e-13
ZFP91	1.0762e-17	-0.0565303	0.129	0.199	2.15229e-13
CCT6A	1.10721e-17	-0.0656964	0.275	0.37	2.2143e-13
ELF2	1.16463e-17	-0.0596861	0.122	0.189	2.32914e-13
PCNXL2	1.1902e-17	-0.0602685	0.088	0.147	2.38029e-13
GPKOW	1.20105e-17	-0.0489758	0.063	0.114	2.40199e-13
CD96	1.25328e-17	-0.0768879	0.304	0.4	2.50643e-13
U2AF2	1.28729e-17	-0.0554436	0.104	0.168	2.57446e-13
MAF1	1.32643e-17	-0.0546217	0.095	0.155	2.65273e-13
TCERG1	1.39759e-17	-0.0581516	0.185	0.266	2.79503e-13
THUMPD1	1.44329e-17	-0.0728082	0.255	0.346	2.88644e-13
HNRNPLL	1.48971e-17	-0.0455019	0.06	0.111	2.97928e-13
TAF4B	1.49311e-17	-0.0506013	0.066	0.119	2.98608e-13
SH3BGRL	1.63451e-17	-0.0558737	0.155	0.23	3.26885e-13
BAHD1	1.67564e-17	-0.0469626	0.054	0.103	3.35111e-13
2020-09-07	1.71932e-17	-0.0657916	0.37	0.48	3.43848e-13
CWC15	1.86477e-17	-0.0638414	0.15	0.221	3.72936e-13
METTL9	1.91898e-17	-0.060414	0.156	0.23	3.83778e-13
SNX14	1.94288e-17	-0.0523533	0.078	0.134	3.88556e-13
GIT2	2.00024e-17	-0.0560164	0.108	0.172	4.00029e-13
PPIE	2.00913e-17	-0.0511907	0.073	0.128	4.01805e-13
SCAF11	2.10338e-17	-0.0910981	0.442	0.548	4.20655e-13
FBXO38	2.14813e-17	-0.0526338	0.073	0.127	4.29605e-13
CHCHD2	2.16352e-17	-0.0529052	0.174	0.254	4.32683e-13
SNRNP70	2.20536e-17	-0.0854116	0.334	0.43	4.41051e-13
JOSD1	2.22886e-17	-0.0659141	0.148	0.219	4.4575e-13
DDOST	2.25815e-17	-0.0528299	0.108	0.171	4.51607e-13
ZBTB11	2.32893e-17	-0.0642736	0.118	0.183	4.65763e-13
PCMT1	2.37476e-17	-0.0523599	0.099	0.161	4.74928e-13
SCLT1	2.46869e-17	-0.0460636	0.053	0.101	4.93714e-13
ARHGAP5	2.47805e-17	-0.0720043	0.204	0.287	4.95586e-13
PGRMC2	2.51843e-17	-0.0562571	0.129	0.199	5.0366e-13
SNX3	2.52437e-17	-0.0573177	0.129	0.198	5.04849e-13
RRN3	2.55594e-17	-0.047838	0.072	0.127	5.11163e-13
TBCB	2.61335e-17	-0.0652098	0.139	0.208	5.22644e-13
CNTRL	2.66246e-17	-0.0950284	0.355	0.454	5.32465e-13
SNX20	2.75898e-17	-0.0508422	0.108	0.172	5.51768e-13
OXLD1	2.83022e-17	-0.0504885	0.075	0.129	5.66015e-13
DAP3	2.90568e-17	-0.0605186	0.191	0.272	5.81107e-13
EEA1	3.02372e-17	-0.068118	0.139	0.209	6.04713e-13
DNPH1	3.02854e-17	-0.0624519	0.093	0.151	6.05677e-13
SLK	3.06609e-17	-0.0835439	0.202	0.28	6.13188e-13
ZNF609	3.14361e-17	-0.0784407	0.249	0.336	6.28691e-13
KLHDC2	3.25095e-17	-0.0540015	0.089	0.148	6.50157e-13
ACTR6	3.27561e-17	-0.0489949	0.072	0.126	6.55089e-13
GNL1	3.29022e-17	-0.0517195	0.097	0.158	6.58012e-13
SYNGR2	3.33594e-17	-0.0528342	0.128	0.196	6.67155e-13
GOLGA7	3.45494e-17	-0.052959	0.155	0.23	6.90954e-13
MAEA	3.55235e-17	-0.0458756	0.06	0.109	7.10434e-13
NHP2L1	3.56993e-17	-0.0600391	0.188	0.268	7.13951e-13
ARAP2	3.59169e-17	-0.0616929	0.148	0.221	7.18302e-13
PPT1	3.59725e-17	-0.0546556	0.14	0.212	7.19413e-13
DIMT1	3.70581e-17	0.0786113	0.155	0.094	7.41124e-13
CCDC25	3.87096e-17	-0.0545146	0.087	0.144	7.74153e-13
MBD2	3.98653e-17	-0.0506466	0.153	0.227	7.97267e-13
RABAC1	4.28715e-17	-0.0508938	0.081	0.138	8.57387e-13
TERF1	4.36526e-17	-0.0465407	0.053	0.101	8.73009e-13
2020-03-06	4.48779e-17	-0.0628295	0.242	0.331	8.97514e-13
HEMK1	4.596e-17	-0.0511509	0.062	0.112	9.19154e-13
ARPC2	4.67782e-17	-0.0809174	0.573	0.689	9.35517e-13
BAG1	4.70624e-17	-0.0546488	0.099	0.16	9.41201e-13
GLO1	4.71345e-17	-0.0521397	0.109	0.173	9.42643e-13
TPD52	4.72532e-17	-0.0437742	0.054	0.102	9.45017e-13
ZNF830	4.77986e-17	-0.0490064	0.067	0.119	9.55924e-13
C1orf27	4.81336e-17	-0.0512228	0.056	0.104	9.62624e-13
MPHOSPH8	4.85877e-17	-0.100002	0.348	0.441	9.71705e-13
SMARCD2	4.88024e-17	-0.0471775	0.062	0.113	9.75999e-13
NUDT5	4.91876e-17	-0.052451	0.077	0.131	9.83703e-13
NUB1	4.93569e-17	-0.0682786	0.243	0.33	9.87089e-13
APRT	5.13009e-17	-0.0513635	0.228	0.317	1.02597e-12
WASF2	5.13381e-17	-0.0559918	0.28	0.377	1.02671e-12
UIMC1	5.38703e-17	-0.054112	0.096	0.156	1.07735e-12
RTCA	5.40017e-17	-0.0478308	0.065	0.116	1.07998e-12
MRPL18	5.71215e-17	-0.0493654	0.066	0.118	1.14237e-12
FLOT2	5.91329e-17	-0.0534984	0.14	0.211	1.1826e-12
CEP95	5.98234e-17	-0.0585768	0.109	0.172	1.19641e-12
SUPT7L	6.08454e-17	-0.0471418	0.074	0.129	1.21685e-12
RAB2A	6.45731e-17	-0.0562718	0.143	0.214	1.2914e-12
TRAPPC10	6.51055e-17	-0.0538691	0.174	0.252	1.30205e-12
PSMD5-AS1	6.56132e-17	-0.0538714	0.082	0.138	1.3122e-12
SUN1	6.80168e-17	-0.0573822	0.126	0.193	1.36027e-12
ARHGEF2	7.10555e-17	-0.0505573	0.085	0.142	1.42104e-12
ITFG2	7.25354e-17	-0.0541781	0.065	0.115	1.45064e-12
SRSF3	7.26962e-17	-0.0762512	0.392	0.495	1.45385e-12
RNF114	7.28902e-17	-0.0514072	0.11	0.174	1.45773e-12
DIAPH2	7.42336e-17	-0.0496781	0.055	0.102	1.4846e-12
AKT3	7.43401e-17	-0.0611481	0.096	0.155	1.48673e-12
ITGAL	7.62575e-17	-0.0731655	0.327	0.426	1.52507e-12
ZMIZ2	7.7711e-17	-0.0471204	0.065	0.116	1.55414e-12
PHF8	7.81271e-17	-0.0474819	0.078	0.134	1.56246e-12
ESCO1	7.90312e-17	-0.0585911	0.105	0.167	1.58054e-12
LSM5	7.96427e-17	-0.0479021	0.076	0.13	1.59277e-12
TWISTNB	7.99279e-17	-0.0590919	0.093	0.151	1.59848e-12
RAB5A	8.27137e-17	-0.05234	0.116	0.181	1.65419e-12
GABPB2	8.27177e-17	-0.0656379	0.123	0.188	1.65427e-12
KIF3A	8.31558e-17	-0.0482885	0.065	0.116	1.66303e-12
AK3	8.35258e-17	-0.0466436	0.061	0.111	1.67043e-12
FBXL15	8.44125e-17	-0.048311	0.066	0.116	1.68817e-12
RORA	8.47021e-17	-0.0890397	0.302	0.394	1.69396e-12
IFT57	8.58601e-17	-0.0443761	0.065	0.116	1.71712e-12
CCNH	8.69875e-17	-0.0454893	0.055	0.102	1.73966e-12
GLRX3	8.75253e-17	-0.0461441	0.059	0.108	1.75042e-12
STAT6	9.52074e-17	-0.0718366	0.326	0.424	1.90405e-12
RNF139	9.52144e-17	-0.0555969	0.096	0.155	1.90419e-12
SLC25A36	9.69189e-17	-0.0611588	0.15	0.222	1.93828e-12
IFFO2	9.72428e-17	-0.0538517	0.085	0.141	1.94476e-12
CUL3	1.07655e-16	-0.0662339	0.161	0.233	2.15299e-12
GTF2A2	1.12578e-16	-0.0497036	0.082	0.137	2.25146e-12
RNF187	1.14498e-16	-0.0480021	0.091	0.149	2.28985e-12
PSMA5	1.16666e-16	-0.0569865	0.134	0.202	2.3332e-12
TIPARP	1.18193e-16	-0.0660851	0.084	0.139	2.36374e-12
PRPSAP1	1.19824e-16	-0.0473508	0.063	0.113	2.39635e-12
CARD11	1.19973e-16	-0.0572165	0.154	0.227	2.39934e-12
BRD1	1.2075e-16	-0.0596153	0.118	0.183	2.41488e-12
CWC22	1.23274e-16	-0.0561488	0.095	0.154	2.46537e-12
KIAA1429	1.27046e-16	-0.0630121	0.138	0.206	2.54078e-12
SNRPD3	1.28391e-16	-0.0532703	0.119	0.184	2.56769e-12
REV3L	1.31775e-16	-0.06865	0.121	0.185	2.63537e-12
STRN3	1.33038e-16	-0.0504167	0.058	0.106	2.66063e-12
CSNK1E	1.35939e-16	-0.0553869	0.089	0.146	2.71865e-12
ADH5	1.38655e-16	-0.0546155	0.106	0.168	2.77296e-12
TAOK1	1.45026e-16	-0.193109	0.282	0.37	2.90038e-12
RILPL2	1.50846e-16	-0.0587125	0.109	0.171	3.01677e-12
COL4A3BP	1.55461e-16	-0.0610079	0.127	0.194	3.10906e-12
PYGB	1.55518e-16	-0.0494341	0.077	0.132	3.11021e-12
CCDC141	1.56977e-16	-0.0538788	0.058	0.106	3.13938e-12
ZFAND6	1.63178e-16	-0.0537353	0.089	0.146	3.26339e-12
EMG1	1.68351e-16	-0.0460277	0.065	0.115	3.36686e-12
ARNTL	1.79889e-16	-0.0481308	0.063	0.113	3.59761e-12
TMEM261	1.82481e-16	-0.051098	0.075	0.129	3.64943e-12
LMBR1L	1.85515e-16	-0.050137	0.088	0.145	3.71011e-12
PHF1	1.8729e-16	-0.0573177	0.129	0.195	3.74561e-12
PARP8	1.88825e-16	-0.0787326	0.246	0.33	3.77632e-12
DCAF5	1.89803e-16	-0.0745552	0.255	0.341	3.79586e-12
GLOD4	1.91018e-16	-0.0504308	0.113	0.176	3.82017e-12
MRPL16	1.91413e-16	-0.0493265	0.083	0.138	3.82807e-12
TRAFD1	1.94664e-16	-0.0536391	0.088	0.145	3.89309e-12
FAM96B	1.95494e-16	-0.0547456	0.119	0.183	3.90968e-12
PRKD2	1.9935e-16	-0.0491193	0.093	0.151	3.9868e-12
TRAPPC1	2.00638e-16	-0.0462392	0.074	0.126	4.01255e-12
RNF157	2.09001e-16	-0.0661008	0.218	0.3	4.17982e-12
LARP1B	2.10936e-16	-0.0479102	0.06	0.108	4.2185e-12
ABR	2.13943e-16	-0.0465488	0.069	0.12	4.27865e-12
REV1	2.18514e-16	-0.0606978	0.138	0.206	4.37006e-12
CASK	2.20553e-16	-0.0549636	0.091	0.148	4.41085e-12
STARD7	2.21565e-16	-0.0542436	0.164	0.238	4.43107e-12
PIGT	2.23579e-16	-0.0439382	0.054	0.101	4.47136e-12
DYRK1A	2.24151e-16	-0.0593833	0.199	0.278	4.4828e-12
CAMK2G	2.3127e-16	-0.0570911	0.092	0.15	4.62516e-12
RAB11FIP2	2.38481e-16	-0.0573844	0.09	0.146	4.76938e-12
CDC37L1	2.44174e-16	-0.0459381	0.058	0.105	4.88324e-12
SLC38A10	2.58379e-16	-0.0565556	0.121	0.185	5.16732e-12
CHD9	2.62884e-16	-0.0664972	0.11	0.172	5.25742e-12
ZNF33B	2.67476e-16	-0.058753	0.093	0.151	5.34926e-12
CDC5L	2.71545e-16	-0.0718802	0.17	0.242	5.43062e-12
DBI	2.72835e-16	-0.0551524	0.101	0.16	5.45642e-12
SNRPF	2.766e-16	-0.0483524	0.091	0.149	5.53172e-12
DYNC1LI2	2.84332e-16	-0.0577543	0.096	0.154	5.68635e-12
SAT2	2.91732e-16	-0.0480956	0.07	0.121	5.83436e-12
EIF2S1	2.93754e-16	-0.054482	0.13	0.197	5.87478e-12
NKTR	2.93849e-16	-0.108937	0.457	0.554	5.87668e-12
SP140	3.12603e-16	-0.0736731	0.155	0.225	6.25175e-12
DNAJB9	3.14662e-16	-0.0511948	0.064	0.113	6.29292e-12
SH3YL1	3.16892e-16	-0.0567323	0.114	0.177	6.33753e-12
ILKAP	3.24585e-16	-0.0460542	0.068	0.119	6.49137e-12
DLG1	3.3255e-16	-0.0598049	0.135	0.202	6.65067e-12
CBX1	3.33926e-16	-0.0571928	0.095	0.153	6.67818e-12
MIER1	3.37562e-16	-0.0629001	0.221	0.303	6.7509e-12
ARMC8	3.53135e-16	-0.0466315	0.076	0.129	7.06235e-12
BST2	3.6097e-16	-0.0476835	0.095	0.153	7.21903e-12
TANK	3.69415e-16	-0.0530211	0.112	0.174	7.38793e-12
EIF4G2	3.70575e-16	0.135021	0.642	0.614	7.41113e-12
RSAD1	3.72126e-16	-0.0469586	0.087	0.143	7.44216e-12
DDX10	3.76326e-16	-0.049219	0.07	0.121	7.52614e-12
PPA1	3.89462e-16	-0.0570331	0.21	0.291	7.78885e-12
ATG3	3.94079e-16	-0.0518735	0.115	0.178	7.88119e-12
UBL5	4.1382e-16	-0.0621671	0.233	0.316	8.27599e-12
DGKD	4.14681e-16	-0.0626652	0.176	0.251	8.2932e-12
RAB21	4.27226e-16	-0.0598589	0.147	0.216	8.54408e-12
WDR26	4.36194e-16	-0.0603869	0.216	0.299	8.72344e-12
RAD21	4.44602e-16	-0.0707382	0.462	0.573	8.8916e-12
EDEM1	4.49453e-16	-0.0539275	0.199	0.28	8.98861e-12
NAE1	4.50233e-16	-0.0567722	0.128	0.193	9.00421e-12
RNF138	4.65962e-16	-0.049378	0.091	0.147	9.31878e-12
LTA4H	4.75208e-16	-0.0494193	0.118	0.182	9.50368e-12
GPI	4.75623e-16	-0.0488563	0.115	0.178	9.51198e-12
RNF11	4.80286e-16	-0.0479382	0.085	0.14	9.60525e-12
PRDX6	4.96612e-16	-0.0546659	0.138	0.206	9.93174e-12
SLFN5	4.99171e-16	-0.115306	0.637	0.731	9.98292e-12
FAM76B	4.99481e-16	-0.0547386	0.098	0.156	9.98913e-12
PIK3R5	5.26963e-16	-0.0557804	0.12	0.183	1.05387e-11
NAA50	5.44051e-16	-0.0609642	0.154	0.224	1.08805e-11
CUEDC2	5.48482e-16	-0.0448336	0.069	0.119	1.09691e-11
ITGA4	5.69561e-16	-0.0948685	0.33	0.423	1.13907e-11
UBA7	5.72706e-16	-0.0485665	0.11	0.172	1.14536e-11
TOX4	5.87761e-16	-0.0586768	0.136	0.203	1.17546e-11
SLC3A2	6.01208e-16	-0.0572953	0.139	0.207	1.20236e-11
SFSWAP	6.18585e-16	-0.0728592	0.216	0.295	1.23711e-11
MSN	6.26542e-16	0.141231	0.523	0.485	1.25302e-11
KLHDC3	6.45178e-16	-0.0434676	0.056	0.102	1.29029e-11
EIF4H	6.5916e-16	-0.0515655	0.161	0.233	1.31825e-11
RRS1	6.66241e-16	-0.0463236	0.057	0.103	1.33242e-11
DCTN2	6.81876e-16	-0.0489469	0.074	0.125	1.36368e-11
ANP32A	6.83863e-16	-0.0607395	0.231	0.315	1.36766e-11
NOA1	6.85003e-16	-0.0477132	0.081	0.135	1.36994e-11
CSNK2A2	6.90918e-16	-0.0555173	0.132	0.198	1.38177e-11
RLF	6.98069e-16	-0.0634468	0.119	0.181	1.39607e-11
CDK13	7.06976e-16	-0.0616663	0.174	0.248	1.41388e-11
NUCB1	7.13385e-16	-0.0551702	0.156	0.226	1.4267e-11
MED13L	7.20742e-16	-0.0605425	0.191	0.268	1.44141e-11
GANAB	7.23823e-16	-0.0443258	0.082	0.137	1.44757e-11
LEO1	7.518e-16	-0.0558644	0.08	0.133	1.50352e-11
SNX2	7.58256e-16	-0.057365	0.114	0.175	1.51644e-11
ANKIB1	7.60815e-16	-0.0640471	0.164	0.236	1.52155e-11
SLC39A6	7.60835e-16	-0.0489694	0.06	0.107	1.52159e-11
SNHG3	7.63168e-16	-0.0488914	0.081	0.135	1.52626e-11
VAV1	7.72841e-16	-0.0559399	0.173	0.247	1.5456e-11
LAMTOR4	7.7469e-16	-0.0526982	0.16	0.231	1.5493e-11
KRCC1	7.83417e-16	-0.0462288	0.078	0.131	1.56676e-11
SP110	7.95552e-16	-0.0594246	0.295	0.388	1.59103e-11
CCNC	8.13326e-16	-0.0433765	0.062	0.11	1.62657e-11
BACH2	8.16712e-16	-0.0569633	0.128	0.193	1.63334e-11
IL11RA	8.24801e-16	-0.0510582	0.065	0.114	1.64952e-11
ANKFY1	8.249e-16	-0.0503825	0.093	0.15	1.64972e-11
POLR2D	8.24925e-16	-0.041691	0.056	0.102	1.64977e-11
RBCK1	8.34198e-16	-0.0475858	0.109	0.171	1.66831e-11
HMOX2	8.46482e-16	-0.0528986	0.156	0.227	1.69288e-11
MRTO4	8.51177e-16	-0.0480759	0.063	0.111	1.70227e-11
C17orf62	8.54752e-16	-0.054959	0.178	0.253	1.70942e-11
NDUFS6	8.73041e-16	-0.0513929	0.104	0.163	1.74599e-11
TUBA4A	8.95941e-16	-0.0505612	0.12	0.183	1.79179e-11
ZC3H7B	9.22456e-16	-0.0436885	0.073	0.125	1.84482e-11
USO1	9.27411e-16	-0.0606405	0.142	0.209	1.85473e-11
SLCO3A1	1.00317e-15	-0.04821	0.067	0.116	2.00624e-11
ANKRD40	1.01237e-15	-0.042428	0.061	0.109	2.02463e-11
PPID	1.02625e-15	-0.0538102	0.081	0.133	2.05239e-11
TIMMDC1	1.07757e-15	-0.0479766	0.075	0.126	2.15503e-11
NOL11	1.08242e-15	-0.0505363	0.097	0.154	2.16473e-11
EPHX2	1.09605e-15	-0.0517758	0.074	0.125	2.19198e-11
HEXIM1	1.09867e-15	-0.0693194	0.234	0.316	2.19722e-11
ABHD13	1.11719e-15	-0.0454926	0.075	0.127	2.23427e-11
USP12	1.12262e-15	-0.0433152	0.071	0.121	2.24513e-11
SNX5	1.13425e-15	-0.0469517	0.088	0.143	2.26839e-11
HSPA4	1.16809e-15	-0.056691	0.188	0.264	2.33605e-11
LEMD2	1.24946e-15	-0.0484361	0.084	0.139	2.4988e-11
WDR70	1.26279e-15	-0.0541577	0.075	0.126	2.52545e-11
FAM208B	1.27213e-15	-0.0574301	0.15	0.219	2.54414e-11
CDS2	1.36419e-15	-0.0476081	0.096	0.153	2.72824e-11
TRAT1	1.38902e-15	-0.0680394	0.352	0.451	2.7779e-11
B4GALT3	1.39913e-15	-0.0396721	0.055	0.101	2.79813e-11
RCHY1	1.41413e-15	-0.0457688	0.061	0.108	2.82812e-11
LINC00402	1.42107e-15	-0.0584536	0.082	0.134	2.842e-11
SEPHS2	1.42776e-15	-0.0543062	0.122	0.184	2.85537e-11
TMCO1	1.4638e-15	-0.0494126	0.111	0.172	2.92745e-11
HNRNPA2B1	1.48433e-15	-0.0952449	0.852	0.894	2.9685e-11
CLK4	1.48728e-15	-0.0499431	0.095	0.152	2.97441e-11
TTC19	1.53216e-15	-0.0619457	0.135	0.2	3.06417e-11
C2CD5	1.55594e-15	-0.056656	0.096	0.153	3.11173e-11
FYN	1.55832e-15	-0.0638876	0.343	0.442	3.11648e-11
THEMIS2	1.55833e-15	-0.0410771	0.058	0.105	3.11651e-11
TTF1	1.56256e-15	-0.0469487	0.064	0.112	3.12496e-11
TRA2A	1.56352e-15	-0.0608637	0.167	0.238	3.12689e-11
PHKB	1.56378e-15	-0.053117	0.084	0.137	3.1274e-11
INPP5K	1.57177e-15	-0.045064	0.071	0.121	3.14338e-11
ATG16L1	1.58729e-15	-0.050669	0.08	0.132	3.17443e-11
ACTR3	1.63094e-15	-0.0664126	0.473	0.587	3.26172e-11
KIF16B	1.63728e-15	-0.0550733	0.06	0.107	3.2744e-11
RAB37	1.64505e-15	-0.0460014	0.072	0.123	3.28994e-11
RNF125	1.65373e-15	-0.0712986	0.179	0.25	3.30729e-11
CDYL	1.66647e-15	-0.0465251	0.063	0.11	3.33278e-11
SDCCAG8	1.67529e-15	-0.0524618	0.081	0.133	3.35042e-11
MRPL34	1.69058e-15	-0.0495486	0.085	0.138	3.38099e-11
BFAR	1.71928e-15	-0.0465822	0.086	0.14	3.43838e-11
PPM1G	1.84629e-15	-0.0626282	0.227	0.307	3.69239e-11
PWWP2A	1.86312e-15	-0.0500487	0.089	0.144	3.72605e-11
MAPKAPK2	1.8649e-15	-0.0524903	0.129	0.194	3.72961e-11
PLEKHB1	1.88243e-15	-0.0449491	0.064	0.111	3.76466e-11
PQBP1	1.93735e-15	-0.0518132	0.127	0.191	3.87451e-11
BAX	1.95272e-15	-0.0464381	0.063	0.11	3.90524e-11
[truncated: 2,372 more rows]

## Sheet: CD8_COVID
Differentially expressed genes in CD8+ T cells for survival vs. non-survival COVID ICU patients
gene	p_val	avg_logFC	pct.1	pct.2	p_val_adj
FTH1	0	-0.732718	0.077	0.69	0
UBB	0	-0.738435	0.253	0.829	0
FOSB	0	-0.840521	0.104	0.678	0
TPT1	0	-0.857529	0.91	0.987	0
FOS	0	-1.04461	0.167	0.763	0
JUN	2.81692e-295	-1.18522	0.259	0.806	4.80821e-291
TSC22D3	4.58187e-270	-0.954512	0.332	0.84	7.8208e-266
SUN2	2.32648e-268	-0.652118	0.24	0.786	3.97107e-264
CXCR4	3.84259e-266	-0.88924	0.334	0.842	6.55891e-262
DUSP1	2.83066e-264	-0.667366	0.136	0.643	4.83166e-260
XIST	5.2904e-262	-0.535119	0.018	0.371	9.03019e-258
TUBA1B	3.1491e-242	-0.407638	0.045	0.433	5.3752e-238
PPIB	7.61031e-230	-0.422293	0.07	0.483	1.299e-225
PHF15	9.42868e-229	-0.307783	0.015	0.325	1.60938e-224
GAPDH	3.08968e-189	-0.520235	0.217	0.664	5.27377e-185
TNFAIP3	4.67032e-187	-0.925335	0.384	0.795	7.97176e-183
NFKBIA	8.04473e-180	-0.754503	0.356	0.772	1.37315e-175
C17orf76-AS1	1.16538e-170	-0.243194	0.021	0.282	1.98918e-166
DDIT4	7.44873e-170	-0.368851	0.065	0.396	1.27142e-165
MYADM	6.52945e-165	-0.453988	0.061	0.378	1.11451e-160
CD69	1.33889e-160	-0.547354	0.199	0.601	2.28535e-156
PPP1R15A	1.317e-157	-0.465548	0.175	0.575	2.24798e-153
SH3BP5	1.43569e-149	-0.314913	0.069	0.381	2.45058e-145
PYURF	4.55093e-144	-0.216777	0.021	0.251	7.76798e-140
SNRPN	3.37459e-143	-0.20669	0.017	0.235	5.76008e-139
DDX3X	4.39031e-140	-0.547654	0.345	0.72	7.49383e-136
EEF1D	6.66063e-138	-0.453808	0.32	0.72	1.1369e-133
CSRNP1	9.17875e-138	-0.301324	0.051	0.324	1.56672e-133
PHF17	8.12022e-134	-0.221393	0.016	0.222	1.38604e-129
SPSB3	5.78045e-129	-0.169271	0.007	0.179	9.86665e-125
KLF6	3.1775e-128	-0.648401	0.67	0.892	5.42368e-124
ETS1	1.17424e-124	-0.528699	0.744	0.953	2.00431e-120
HLA-C	3.19125e-122	-0.415606	0.967	0.984	5.44714e-118
NOL7	1.56051e-118	-0.21206	0.029	0.243	2.66363e-114
SRSF2	3.64397e-118	-0.386978	0.222	0.575	6.21989e-114
ZFP36L2	1.47699e-113	-0.526311	0.565	0.856	2.52107e-109
TUBB4B	4.3254e-113	-0.281662	0.073	0.339	7.38302e-109
GADD45B	9.88741e-113	-0.45389	0.187	0.516	1.68768e-108
YPEL5	1.59908e-110	-0.402985	0.188	0.514	2.72947e-106
PSMA6	1.8082e-110	-0.188531	0.028	0.228	3.08642e-106
IER2	2.11321e-109	-0.364523	0.167	0.487	3.60705e-105
NR4A2	8.20213e-109	-0.381042	0.107	0.392	1.40002e-104
MCL1	1.45177e-108	-0.441947	0.438	0.772	2.47802e-104
FAM46C	1.75248e-104	-0.343512	0.124	0.416	2.99131e-100
EEF1A1	1.76089e-104	0.474562	0.902	0.731	3.00566e-100
FKBP5	8.1388e-101	-0.397489	0.204	0.517	1.38921e-96
HEXIM1	6.33065e-98	-0.430773	0.208	0.515	1.08058e-93
SRGN	3.77974e-97	-0.445783	0.482	0.79	6.45163e-93
EIF4A1	4.72947e-95	-0.215256	0.052	0.268	8.07274e-91
AES	1.79385e-94	-0.289601	0.163	0.459	3.06192e-90
RGCC	2.44414e-93	-0.208632	0.033	0.22	4.1719e-89
RN7SL4P	6.40758e-93	0.390886	0.342	0.017	1.09371e-88
MGAT2	1.82008e-92	-0.121368	0.005	0.13	3.10669e-88
LMNA	2.37504e-92	-0.191578	0.022	0.19	4.05396e-88
RHOF	2.78985e-92	-0.141728	0.012	0.157	4.76199e-88
TUBA1A	6.3294e-92	-0.331674	0.142	0.422	1.08037e-87
HNRNPDL	2.09493e-91	-0.360915	0.486	0.805	3.57583e-87
SRSF7	2.66052e-90	-0.354123	0.312	0.632	4.54124e-86
MALAT1	3.89192e-90	-0.660966	0.999	0.997	6.64312e-86
IDS	1.12853e-89	0.355168	0.336	0.018	1.92629e-85
IL7R	2.30045e-88	-0.847154	0.401	0.661	3.92664e-84
C20orf24	9.49592e-88	-0.138741	0.013	0.155	1.62086e-83
ADCY7	2.2075e-87	-0.227947	0.07	0.294	3.76799e-83
PHB	2.29364e-87	-0.175305	0.037	0.222	3.91501e-83
CD97	2.48386e-87	-0.324367	0.273	0.586	4.23971e-83
CCNL1	4.62888e-85	-0.364342	0.371	0.694	7.90104e-81
RSRC2	4.37852e-84	-0.317982	0.208	0.501	7.4737e-80
ZMYM6NB	4.89009e-81	-0.112539	0.007	0.124	8.34689e-77
IER5	8.09813e-81	-0.274924	0.107	0.348	1.38227e-76
CCDC107	2.07226e-80	-0.122138	0.01	0.137	3.53713e-76
IGKC	2.36259e-80	-0.257955	0.014	0.148	4.03271e-76
MAN1A2	3.83741e-80	-0.359528	0.335	0.633	6.55007e-76
JUNB	7.19327e-80	-0.399235	0.288	0.572	1.22782e-75
SQSTM1	9.36072e-80	-0.182961	0.067	0.278	1.59778e-75
STUB1	4.66505e-79	-0.154809	0.03	0.192	7.96277e-75
EIF4A2	1.22767e-78	-0.34546	0.433	0.733	2.09552e-74
BCAS4	1.56255e-77	0.31755	0.341	0.042	2.66712e-73
GNB2L1	1.64553e-77	-0.343032	0.707	0.906	2.80875e-73
DNAJA1	1.78034e-76	-0.340457	0.26	0.546	3.03885e-72
MAZ	6.44666e-76	-0.124925	0.013	0.14	1.10038e-71
JHDM1D	5.62647e-75	-0.125275	0.011	0.133	9.60382e-71
ILK	1.16161e-73	-0.103584	0.006	0.113	1.98275e-69
SMAP2	6.46395e-73	-0.324979	0.259	0.536	1.10333e-68
ODC1	3.04077e-72	-0.238431	0.109	0.337	5.19029e-68
EIF1	2.57049e-71	-0.368897	0.634	0.857	4.38757e-67
NUDT3	1.70065e-70	-0.201685	0.063	0.252	2.90285e-66
SLC25A6	6.78149e-69	-0.284465	0.309	0.594	1.15753e-64
CLK1	9.95409e-69	-0.270885	0.234	0.507	1.69906e-64
SRSF5	1.03044e-68	-0.315915	0.508	0.789	1.75886e-64
HMHA1	3.37563e-68	-0.291129	0.292	0.571	5.76187e-64
DUSP2	3.52105e-68	-0.310928	0.15	0.39	6.01008e-64
B2M	1.3954e-67	-0.279404	1	0.996	2.38181e-63
KLF2	1.95854e-67	-0.319166	0.337	0.613	3.34304e-63
PNRC2	3.35841e-67	0.271739	0.268	0.015	5.73248e-63
FDPS	5.42595e-67	-0.146486	0.036	0.189	9.26156e-63
FUS	5.03155e-66	-0.313671	0.389	0.667	8.58836e-62
RBM3	5.75217e-65	-0.287895	0.296	0.57	9.81838e-61
SNHG5	1.57899e-64	-0.265022	0.243	0.507	2.69518e-60
SIK1	3.82561e-64	-0.138421	0.024	0.157	6.52994e-60
IGLC3	4.8716e-64	0.338796	0.25	0.01	8.31533e-60
RGS1	5.28577e-64	-0.316111	0.074	0.26	9.02228e-60
SLC38A1	8.42969e-64	-0.331359	0.518	0.775	1.43886e-59
C10orf137	8.60439e-64	-0.102033	0.007	0.104	1.46868e-59
GZMK	2.08757e-63	-0.254595	0.054	0.223	3.56327e-59
EIF5	3.78234e-63	-0.304062	0.289	0.551	6.45607e-59
JMJD6	8.82598e-63	-0.196466	0.081	0.274	1.50651e-58
UBALD2	1.32413e-62	-0.248398	0.148	0.378	2.26015e-58
JADE2	1.82264e-62	0.261765	0.255	0.016	3.11107e-58
VIM	3.15245e-62	-0.356758	0.551	0.789	5.38092e-58
LSP1	8.43222e-62	0.249929	0.245	0.011	1.4393e-57
SNRPD2	4.01872e-61	-0.250028	0.313	0.589	6.85956e-57
ATF3	8.29378e-61	-0.138215	0.015	0.125	1.41567e-56
PLP2	4.71755e-60	-0.100713	0.011	0.112	8.05239e-56
STK17B	6.65931e-59	-0.307732	0.445	0.704	1.13668e-54
TMEM259	7.94646e-59	-0.205753	0.109	0.311	1.35638e-54
SLA	8.70494e-58	-0.250256	0.213	0.458	1.48585e-53
COX20	4.66692e-57	-0.105763	0.016	0.125	7.96597e-53
CRIP1	6.95741e-57	0.246142	0.24	0.017	1.18756e-52
ZFAS1	7.79956e-57	-0.204834	0.134	0.346	1.33131e-52
SMARCA5	2.52789e-56	-0.281473	0.365	0.622	4.31486e-52
H3F3B	8.5748e-56	-0.35902	0.702	0.87	1.46363e-51
TAF1D	1.63589e-55	-0.213695	0.137	0.347	2.7923e-51
SFPQ	2.65036e-55	-0.273283	0.344	0.599	4.52391e-51
CX3CR1	3.08524e-55	0.394117	0.465	0.209	5.26619e-51
NAP1L1	4.95587e-55	-0.25554	0.301	0.553	8.45918e-51
RBM38	9.60361e-55	-0.182016	0.076	0.248	1.63924e-50
IRF1	9.42471e-54	-0.289763	0.258	0.493	1.6087e-49
PIK3R1	1.71485e-53	-0.388661	0.434	0.656	2.92707e-49
RN7SL5P	1.77965e-53	0.229922	0.213	0.008	3.03768e-49
PAIP2	5.35315e-53	-0.185782	0.118	0.315	9.1373e-49
LDHB	6.01686e-53	-0.268687	0.312	0.562	1.02702e-48
SNHG6	1.22341e-52	-0.184825	0.133	0.339	2.08824e-48
VPS51	1.46045e-52	-0.137153	0.048	0.193	2.49285e-48
NUCKS1	3.28439e-52	-0.28329	0.333	0.577	5.60612e-48
ZFP36	7.62638e-51	-0.236331	0.177	0.391	1.30175e-46
WDR6	1.1403e-50	-0.128444	0.041	0.176	1.94638e-46
ARID4B	2.83729e-50	-0.263154	0.335	0.576	4.84298e-46
NHP2	8.97865e-50	-0.104015	0.023	0.132	1.53257e-45
EIF3A	1.00852e-49	-0.282169	0.412	0.652	1.72144e-45
SLC38A2	1.02185e-49	-0.257491	0.195	0.409	1.74419e-45
PDE4D	2.11531e-49	-0.258655	0.141	0.335	3.61062e-45
PRELID1	3.8787e-49	-0.111047	0.03	0.148	6.62056e-45
ANKRD12	4.27322e-49	-0.269953	0.398	0.644	7.29396e-45
RN7SL128P	6.68679e-49	0.205398	0.197	0.007	1.14137e-44
AIM1	8.81642e-49	-0.231719	0.167	0.372	1.50487e-44
SNHG12	1.10233e-48	-0.134517	0.051	0.191	1.88156e-44
COTL1	1.19442e-48	-0.194838	0.1	0.278	2.03876e-44
SMAD7	1.7344e-48	-0.191761	0.083	0.248	2.96045e-44
SLC25A5	2.1434e-48	-0.173326	0.106	0.286	3.65857e-44
RGS2	4.66856e-48	-0.18644	0.082	0.246	7.96877e-44
BTG1	5.38163e-48	-0.320482	0.602	0.795	9.18591e-44
TRA2B	8.48723e-48	-0.22929	0.321	0.565	1.44868e-43
EEF2	9.30672e-48	-0.261405	0.687	0.898	1.58856e-43
AHNAK	1.10679e-47	0.297243	0.973	0.909	1.88917e-43
SRSF10	1.22411e-47	0.210869	0.204	0.014	2.08942e-43
CCND3	3.43649e-47	-0.221248	0.314	0.555	5.86575e-43
HECA	4.55194e-47	-0.229386	0.273	0.499	7.76971e-43
TMEM66	4.7183e-47	-0.263321	0.461	0.697	8.05366e-43
NAP1L4	5.03443e-47	-0.207372	0.205	0.423	8.59327e-43
PLEK	6.91215e-47	0.366969	0.697	0.512	1.17983e-42
CIRBP	1.37834e-46	-0.235087	0.289	0.516	2.35269e-42
NT5C2	1.53982e-46	-0.12928	0.041	0.168	2.62831e-42
PCBP1	1.61461e-46	-0.222074	0.23	0.444	2.75598e-42
PIK3IP1	1.62768e-46	-0.243996	0.214	0.424	2.77829e-42
HLA-F	2.10251e-46	-0.260933	0.487	0.715	3.58878e-42
ST3GAL1	2.53573e-46	-0.244827	0.235	0.452	4.32823e-42
NOP58	4.28713e-46	-0.206038	0.178	0.383	7.3177e-42
RBM39	7.9192e-46	-0.265829	0.561	0.784	1.35173e-41
CSDE1	1.63995e-45	-0.251908	0.544	0.772	2.79923e-41
OST4	5.48601e-45	-0.149651	0.09	0.253	9.36408e-41
ICAM2	6.48717e-45	-0.097906	0.021	0.12	1.10729e-40
COX7C	7.06951e-45	-0.209231	0.282	0.508	1.20669e-40
TUBA4A	7.94517e-45	-0.199276	0.114	0.289	1.35616e-40
ZNF331	8.81599e-45	-0.193721	0.078	0.231	1.5048e-40
PDE4B	9.13117e-45	-0.156785	0.064	0.208	1.5586e-40
CHD1	2.30793e-44	-0.23634	0.242	0.455	3.93941e-40
EIF3C	3.57536e-44	0.205349	0.211	0.025	6.10278e-40
ANXA1	4.23162e-44	-0.314199	0.503	0.704	7.22295e-40
CHMP1B	4.51493e-44	-0.138632	0.074	0.227	7.70653e-40
ACAA1	5.67714e-44	-0.118822	0.037	0.155	9.69031e-40
PSME1	8.20715e-44	-0.240871	0.461	0.684	1.40088e-39
IL6ST	8.80365e-44	-0.244813	0.104	0.271	1.50269e-39
SRSF3	4.26728e-43	-0.222039	0.336	0.563	7.28382e-39
TSPYL2	5.28394e-43	-0.20628	0.129	0.308	9.01916e-39
LARP7	5.9265e-43	-0.167381	0.099	0.263	1.01159e-38
UQCR11	7.49017e-43	0.182841	0.19	0.015	1.2785e-38
DDIT3	1.02951e-42	-0.117213	0.028	0.134	1.75726e-38
PARP8	1.35777e-42	-0.278396	0.392	0.609	2.31758e-38
AKAP13	1.00016e-41	-0.279154	0.564	0.765	1.70717e-37
PNP	1.47889e-41	-0.102934	0.027	0.129	2.52431e-37
ZNF276	2.67261e-41	-0.20544	0.186	0.38	4.56188e-37
CD83	5.61907e-41	-0.105035	0.027	0.128	9.59119e-37
FYB	8.74064e-41	-0.247566	0.493	0.709	1.49194e-36
NCL	1.38725e-40	-0.230284	0.603	0.818	2.3679e-36
TRGC1	1.62746e-40	0.291961	0.311	0.105	2.77791e-36
TMSB10	2.74622e-40	-0.245142	0.908	0.964	4.68752e-36
PDIA6	3.13056e-40	-0.217232	0.206	0.401	5.34356e-36
CHD2	3.93151e-40	-0.273348	0.43	0.639	6.7107e-36
IFNAR2	4.0516e-40	-0.128777	0.056	0.186	6.91567e-36
HLA-DQB1	4.99313e-40	-0.0852516	0.019	0.108	8.52277e-36
GLTSCR2	6.10468e-40	-0.249029	0.558	0.778	1.04201e-35
CIR1	6.41639e-40	-0.162043	0.103	0.263	1.09521e-35
ATF4	2.4711e-38	-0.215083	0.305	0.513	4.21791e-34
CCDC88B	2.75411e-38	-0.193808	0.179	0.364	4.70099e-34
SLC7A6OS	4.08182e-38	-0.0876714	0.019	0.105	6.96726e-34
SERTAD1	4.94601e-38	-0.112933	0.044	0.159	8.44234e-34
DNAJC9	4.98811e-38	-0.10309	0.032	0.135	8.5142e-34
CDC42SE1	6.52732e-38	-0.191929	0.279	0.486	1.11415e-33
TUBA1C	7.0676e-38	-0.102083	0.033	0.136	1.20637e-33
TAP2	7.96658e-38	0.170862	0.182	0.02	1.35982e-33
GLIPR1	9.34809e-38	-0.170275	0.123	0.286	1.59563e-33
HSP90AB1	1.70441e-37	-0.233539	0.598	0.803	2.90926e-33
PRKX	1.87688e-37	-0.173287	0.145	0.317	3.20364e-33
C6orf48	1.98616e-37	-0.159907	0.143	0.316	3.39018e-33
TERF2IP	3.97958e-37	-0.204033	0.25	0.447	6.79274e-33
NCK2	5.19969e-37	-0.142883	0.102	0.255	8.87535e-33
SMARCE1	5.82224e-37	-0.143839	0.101	0.253	9.93799e-33
DNAJB1	2.89315e-36	-0.235316	0.233	0.421	4.93831e-32
TMF1	3.55109e-36	-0.190252	0.171	0.348	6.06135e-32
SNHG16	4.43679e-36	-0.0921687	0.029	0.124	7.57316e-32
HNRNPH1	1.17772e-35	-0.251819	0.442	0.647	2.01026e-31
ENC1	1.70038e-35	-0.144939	0.084	0.224	2.90237e-31
LDHA	1.82038e-35	-0.209522	0.258	0.449	3.10721e-31
KRR1	1.90919e-35	-0.120388	0.076	0.21	3.25879e-31
NDUFA1	1.96509e-35	-0.160154	0.168	0.345	3.35421e-31
DDX21	2.60827e-35	-0.200961	0.241	0.433	4.45206e-31
LEPROTL1	4.01067e-35	-0.143141	0.11	0.263	6.84582e-31
PTGER4	5.29277e-35	-0.203357	0.173	0.344	9.03424e-31
PDE3B	8.42672e-35	-0.147818	0.078	0.211	1.43836e-30
TMSB4X	9.1557e-35	0.24048	0.923	0.872	1.56279e-30
PGK1	1.06375e-34	-0.173555	0.253	0.447	1.81572e-30
ARHGDIA	1.60093e-34	-0.119011	0.068	0.195	2.73263e-30
CREM	2.00796e-34	-0.130573	0.053	0.167	3.42738e-30
SYTL3	2.10055e-34	-0.169322	0.163	0.333	3.58542e-30
BUD31	3.17809e-34	-0.104621	0.053	0.169	5.42468e-30
LSM1	3.54667e-34	-0.0857567	0.025	0.112	6.05381e-30
H3F3C	3.64031e-34	0.151076	0.163	0.017	6.21364e-30
PPP1CA	4.02987e-34	-0.148016	0.146	0.312	6.87858e-30
MORF4L1	8.72621e-34	-0.177287	0.262	0.456	1.48948e-29
TMC6	2.06026e-33	-0.178449	0.217	0.396	3.51665e-29
CD48	2.40421e-33	-0.187156	0.302	0.5	4.10375e-29
IDI1	3.43994e-33	-0.164375	0.152	0.314	5.87163e-29
FCGR3B	5.14549e-33	0.151618	0.147	0.01	8.78283e-29
HLA-A	1.21369e-32	-0.184636	0.986	0.995	2.07166e-28
NKG7	1.33196e-32	0.25211	0.461	0.268	2.27353e-28
C16orf80	1.93228e-32	-0.0981106	0.033	0.127	3.29821e-28
HNRNPR	3.91585e-32	-0.192347	0.339	0.534	6.68396e-28
EPC1	4.44719e-32	-0.173028	0.213	0.388	7.59092e-28
HIST1H1E	4.48687e-32	0.233371	0.292	0.114	7.65864e-28
KLF9	6.02481e-32	-0.172491	0.144	0.3	1.02837e-27
C11orf31	6.575e-32	-0.104228	0.051	0.159	1.12229e-27
CEBPZ	9.36617e-32	-0.146628	0.131	0.284	1.59871e-27
ITSN2	1.02526e-31	-0.20086	0.258	0.438	1.75002e-27
NASP	1.1496e-31	-0.153614	0.136	0.29	1.96226e-27
ZNRD1-AS1	1.48514e-31	0.150385	0.164	0.023	2.53498e-27
PDCD4	1.49259e-31	-0.200834	0.289	0.473	2.54771e-27
GGNBP2	1.83469e-31	-0.170642	0.202	0.375	3.13162e-27
HLA-G	1.83511e-31	-0.159903	0.157	0.314	3.13236e-27
NUMA1	3.78061e-31	-0.18284	0.167	0.325	6.45312e-27
SERINC1	4.00509e-31	-0.17506	0.261	0.443	6.83628e-27
IFRD1	4.6949e-31	-0.104262	0.046	0.148	8.01372e-27
SMCHD1	5.26211e-31	-0.239729	0.485	0.676	8.9819e-27
DHX36	6.09988e-31	-0.175731	0.196	0.364	1.04119e-26
DCAF8	6.83181e-31	0.142769	0.147	0.014	1.16612e-26
LYZ	8.9101e-31	-0.24908	0.065	0.181	1.52086e-26
MATR3	1.88952e-30	-0.198126	0.461	0.655	3.22522e-26
PSMD7	1.97483e-30	-0.152569	0.125	0.268	3.37084e-26
SYAP1	1.99591e-30	-0.133296	0.09	0.22	3.40682e-26
ARPC1B	2.06518e-30	-0.18735	0.385	0.583	3.52505e-26
MAN2A2	2.07205e-30	-0.106661	0.052	0.159	3.53677e-26
TMED9	2.34237e-30	-0.151458	0.157	0.313	3.99819e-26
KPNB1	2.35502e-30	-0.188756	0.315	0.504	4.01979e-26
PLEKHA2	2.41619e-30	-0.169344	0.207	0.375	4.1242e-26
CYTIP	2.45286e-30	-0.156398	0.191	0.358	4.18678e-26
UQCRB	4.80833e-30	-0.162436	0.278	0.464	8.20733e-26
JMJD1C	4.81986e-30	-0.204054	0.215	0.38	8.22702e-26
TMBIM4	6.70221e-30	0.125797	0.128	0.006	1.144e-25
PIM2	9.54234e-30	-0.129141	0.085	0.21	1.62878e-25
SAT1	1.16787e-29	-0.167728	0.143	0.293	1.99344e-25
NKTR	1.1962e-29	-0.210105	0.313	0.492	2.04179e-25
PER1	1.20902e-29	-0.097543	0.046	0.146	2.06367e-25
EIF4B	1.29219e-29	-0.189194	0.487	0.69	2.20564e-25
PRMT2	1.83793e-29	-0.172797	0.264	0.441	3.13716e-25
NFKBIB	2.141e-29	-0.0957528	0.043	0.14	3.65448e-25
TMEM2	2.16699e-29	-0.167913	0.115	0.254	3.69883e-25
OXNAD1	2.21903e-29	-0.127499	0.09	0.216	3.78766e-25
BTG2	2.37938e-29	-0.162466	0.135	0.281	4.06137e-25
DDX46	2.85936e-29	-0.187948	0.248	0.419	4.88065e-25
HERPUD1	3.80885e-29	-0.122095	0.107	0.243	6.50133e-25
GBP2	3.84914e-29	-0.183621	0.271	0.45	6.5701e-25
HMGB2	4.40079e-29	-0.192609	0.212	0.372	7.51171e-25
ARL4C	4.42463e-29	-0.221446	0.735	0.871	7.5524e-25
GOLGA4	5.9989e-29	-0.215213	0.263	0.432	1.02395e-24
CERKL	6.45086e-29	0.136606	0.153	0.022	1.1011e-24
LINC00623	1.02849e-28	0.127169	0.128	0.008	1.75554e-24
KDM2A	1.03508e-28	-0.18791	0.277	0.448	1.76678e-24
ACTB	1.09568e-28	0.247827	0.82	0.697	1.87021e-24
PSMA7	1.89025e-28	-0.162603	0.267	0.443	3.22647e-24
ENSA	2.04896e-28	-0.153885	0.218	0.388	3.49737e-24
CALM3	2.17007e-28	-0.153834	0.181	0.338	3.7041e-24
TAGLN2	2.2047e-28	-0.162436	0.176	0.328	3.76321e-24
SMC1A	2.39796e-28	-0.164344	0.18	0.338	4.09307e-24
GUK1	2.49073e-28	-0.164397	0.336	0.523	4.25142e-24
CD37	2.57687e-28	-0.114112	0.083	0.204	4.39845e-24
JUND	2.74012e-28	-0.176564	0.191	0.347	4.67712e-24
EHBP1L1	3.68337e-28	-0.140823	0.143	0.289	6.28715e-24
SF3B1	3.831e-28	-0.197789	0.646	0.822	6.53913e-24
PPIG	4.55255e-28	-0.169076	0.208	0.369	7.77074e-24
GIMAP7	4.58599e-28	-0.189339	0.298	0.469	7.82782e-24
AKAP9	5.02627e-28	-0.227279	0.32	0.488	8.57934e-24
FAM107B	5.31518e-28	-0.183455	0.339	0.516	9.07248e-24
KBTBD2	5.67736e-28	-0.133067	0.106	0.237	9.69069e-24
RAB8A	6.01613e-28	-0.115441	0.089	0.212	1.02689e-23
WDR74	9.6287e-28	-0.0713302	0.025	0.102	1.64352e-23
PCBP2	1.07762e-27	-0.150395	0.232	0.402	1.83939e-23
CD55	1.47925e-27	-0.113924	0.063	0.17	2.52494e-23
TAGAP	1.98799e-27	-0.183362	0.235	0.399	3.3933e-23
PRDX1	2.10521e-27	-0.113105	0.08	0.197	3.59338e-23
CD44	2.15059e-27	-0.167433	0.401	0.598	3.67085e-23
BECN1	2.37217e-27	-0.116962	0.087	0.207	4.04906e-23
LTB	2.47745e-27	-0.294847	0.191	0.345	4.22875e-23
LPIN2	2.70251e-27	-0.172242	0.218	0.38	4.61291e-23
PMAIP1	3.89623e-27	-0.136123	0.084	0.201	6.65047e-23
UBE2D3	3.90936e-27	-0.156329	0.416	0.612	6.67288e-23
DNAJC8	4.13221e-27	-0.133238	0.157	0.307	7.05328e-23
NFKBIZ	4.16284e-27	-0.147483	0.091	0.211	7.10556e-23
ITGA6	4.33483e-27	-0.145352	0.103	0.23	7.39912e-23
PPP1R16B	5.23153e-27	-0.140811	0.145	0.289	8.92969e-23
SLTM	5.33849e-27	-0.188045	0.3	0.468	9.11227e-23
DNTTIP2	5.59592e-27	-0.155005	0.206	0.367	9.55168e-23
SPTY2D1	6.57924e-27	-0.14252	0.129	0.266	1.12301e-22
GABARAPL1	9.00523e-27	-0.119233	0.085	0.203	1.5371e-22
C21orf59	9.24439e-27	-0.0752457	0.031	0.112	1.57793e-22
ACO2	1.12906e-26	-0.0731701	0.029	0.107	1.9272e-22
PNN	1.22375e-26	-0.186498	0.243	0.404	2.08882e-22
NOP56	1.23442e-26	-0.153707	0.221	0.384	2.10702e-22
JTB	1.34415e-26	-0.145837	0.227	0.392	2.29434e-22
H2AFX	1.47346e-26	-0.0734028	0.027	0.103	2.51505e-22
RECQL	1.64679e-26	-0.142969	0.161	0.309	2.81091e-22
IVNS1ABP	1.78606e-26	-0.160192	0.167	0.312	3.04863e-22
COX6C	1.78635e-26	-0.148247	0.218	0.379	3.04912e-22
ADAM17	2.73087e-26	-0.097925	0.054	0.153	4.66132e-22
WDR60	3.21376e-26	-0.132821	0.086	0.202	5.48557e-22
MYL6	5.26394e-26	-0.195309	0.68	0.842	8.98502e-22
TOP1	5.50465e-26	-0.128074	0.142	0.283	9.39588e-22
TMX4	6.41738e-26	-0.154035	0.283	0.457	1.09538e-21
PRPF38B	7.04077e-26	-0.185515	0.279	0.445	1.20179e-21
NDUFS5	7.1844e-26	-0.108196	0.102	0.227	1.22631e-21
SPAG9	8.02077e-26	-0.118053	0.112	0.242	1.36906e-21
CYLD	1.09646e-25	-0.180835	0.372	0.548	1.87154e-21
CALR	1.21105e-25	-0.190199	0.386	0.565	2.06714e-21
SLC2A3	1.60874e-25	-0.145615	0.181	0.332	2.74596e-21
S100A8	1.86209e-25	-0.415817	0.183	0.328	3.17839e-21
FAM53C	1.89345e-25	-0.0839896	0.038	0.122	3.23194e-21
H2AFV	2.70053e-25	-0.135712	0.195	0.35	4.60953e-21
PIM3	4.35099e-25	-0.079585	0.035	0.116	7.42671e-21
PARK7	4.614e-25	-0.136971	0.182	0.33	7.87564e-21
DNAJC2	5.32671e-25	-0.111737	0.087	0.202	9.09217e-21
USP47	5.32884e-25	-0.15814	0.217	0.373	9.09579e-21
RN7SL3	8.50265e-25	0.103428	0.109	0.006	1.45132e-20
ORMDL2	1.12074e-24	-0.0712396	0.028	0.102	1.91299e-20
BBX	1.14286e-24	-0.1772	0.283	0.44	1.95075e-20
PHF14	1.17457e-24	-0.12486	0.108	0.231	2.00488e-20
SMAP1	1.39219e-24	-0.0768152	0.036	0.118	2.37633e-20
NDUFS7	1.48626e-24	-0.0735991	0.033	0.111	2.53689e-20
CYCS	1.72931e-24	-0.112368	0.101	0.22	2.95176e-20
SNW1	1.74553e-24	-0.116011	0.122	0.251	2.97944e-20
DHX38	1.86568e-24	-0.115463	0.096	0.213	3.18453e-20
TXLNG	2.15458e-24	-0.0996885	0.063	0.164	3.67765e-20
RIOK1	2.28405e-24	-0.0934813	0.06	0.158	3.89865e-20
HMGN1	2.36064e-24	-0.13193	0.17	0.313	4.02938e-20
USP20	2.83162e-24	-0.0920566	0.059	0.157	4.83328e-20
P4HB	3.04168e-24	-0.139564	0.195	0.344	5.19184e-20
ACTR2	3.14809e-24	-0.187326	0.593	0.749	5.37347e-20
MRPL9	3.59006e-24	-0.0863394	0.054	0.148	6.12787e-20
ERH	4.09399e-24	-0.112172	0.098	0.215	6.98804e-20
ARID4A	4.24559e-24	-0.15673	0.136	0.264	7.24679e-20
UBE2L6	4.44095e-24	-0.130397	0.145	0.279	7.58027e-20
FGL2	4.72747e-24	0.16576	0.208	0.071	8.06932e-20
JADE1	4.81575e-24	0.112311	0.106	0.006	8.22e-20
EMC10	6.66162e-24	-0.0859756	0.052	0.144	1.13707e-19
RLF	6.71009e-24	-0.112762	0.107	0.229	1.14535e-19
BRD2	6.74833e-24	-0.216678	0.502	0.648	1.15187e-19
MLLT6	9.68572e-24	-0.155793	0.423	0.598	1.65326e-19
LGALS8	1.00762e-23	-0.133077	0.129	0.255	1.71991e-19
TRMT112	1.06237e-23	-0.116547	0.129	0.258	1.81336e-19
IFNGR1	1.06657e-23	-0.112352	0.088	0.198	1.82053e-19
ADSS	1.10964e-23	-0.111804	0.101	0.218	1.89404e-19
METRNL	1.12264e-23	-0.0842445	0.044	0.13	1.91623e-19
PPP2CA	1.21683e-23	-0.123447	0.147	0.282	2.07701e-19
NEMF	1.34786e-23	-0.151586	0.169	0.306	2.30065e-19
PIEZO1	1.41136e-23	-0.103581	0.098	0.214	2.40906e-19
ZRSR2	1.74868e-23	-0.0903353	0.061	0.158	2.98482e-19
CD52	1.75422e-23	0.229139	0.493	0.342	2.99428e-19
GAS5	1.84754e-23	-0.155193	0.208	0.352	3.15356e-19
HBP1	1.94857e-23	-0.0921348	0.065	0.164	3.32601e-19
HNRNPD	2.01869e-23	-0.15699	0.362	0.531	3.44569e-19
RABGGTB	2.07556e-23	-0.09275	0.062	0.16	3.54277e-19
FGFBP2	2.10258e-23	0.239582	0.433	0.269	3.5889e-19
VAMP5	2.20016e-23	-0.0974229	0.081	0.189	3.75546e-19
CPT1A	2.31798e-23	-0.152446	0.204	0.349	3.95655e-19
HNRNPM	2.33904e-23	-0.166394	0.417	0.586	3.99251e-19
HSP90AA1	2.84827e-23	-0.18165	0.754	0.894	4.86171e-19
ERAP2	3.68723e-23	-0.136006	0.128	0.254	6.29373e-19
SNORD89	4.51512e-23	0.109472	0.117	0.014	7.70686e-19
GBP5	4.71783e-23	-0.235545	0.461	0.604	8.05287e-19
RHOB	4.95522e-23	-0.0994007	0.054	0.145	8.45807e-19
IQGAP2	5.37541e-23	-0.182013	0.432	0.601	9.17528e-19
RASSF1	5.98917e-23	-0.127471	0.158	0.292	1.02229e-18
PSMA1	6.23198e-23	0.101743	0.105	0.008	1.06374e-18
ROCK1	7.17847e-23	-0.165404	0.337	0.498	1.22529e-18
SEC63	7.57011e-23	-0.125502	0.152	0.286	1.29214e-18
RSF1	9.91113e-23	-0.172603	0.252	0.4	1.69173e-18
GOLGB1	1.06595e-22	-0.1786	0.243	0.393	1.81948e-18
FOXO1	1.07663e-22	-0.108858	0.091	0.2	1.83771e-18
NFATC3	1.08058e-22	-0.128781	0.135	0.261	1.84444e-18
FAM65B	1.12938e-22	-0.187405	0.544	0.707	1.92773e-18
YME1L1	1.21365e-22	-0.149806	0.275	0.431	2.07158e-18
ACAP1	1.306e-22	-0.15808	0.278	0.433	2.22922e-18
EIF3M	1.41732e-22	-0.107654	0.107	0.224	2.41922e-18
VCP	1.49361e-22	-0.145255	0.29	0.451	2.54944e-18
TMEM87A	1.55676e-22	-0.10793	0.092	0.202	2.65723e-18
ANKRD32	1.55799e-22	-0.0784951	0.041	0.122	2.65933e-18
FAM21A	1.6433e-22	0.126106	0.15	0.036	2.80496e-18
ISG20	1.73475e-22	-0.139995	0.207	0.352	2.96105e-18
XAF1	1.81393e-22	0.275691	0.523	0.38	3.0962e-18
EWSR1	1.82436e-22	-0.150795	0.269	0.422	3.114e-18
KHNYN	1.90511e-22	-0.0913002	0.064	0.16	3.25183e-18
FAM21B	2.02313e-22	0.107805	0.117	0.016	3.45328e-18
WDR33	2.05902e-22	-0.113218	0.106	0.221	3.51454e-18
NEU1	2.39746e-22	-0.0781888	0.035	0.11	4.09222e-18
GTPBP4	3.41558e-22	-0.110414	0.09	0.197	5.83005e-18
DDX27	3.5259e-22	-0.119973	0.126	0.248	6.01837e-18
ELF1	3.57732e-22	-0.156106	0.362	0.528	6.10613e-18
USP34	3.59362e-22	-0.180313	0.317	0.468	6.13394e-18
CORO1A	4.035e-22	-0.171146	0.489	0.649	6.88733e-18
SLC12A7	4.34836e-22	-0.069439	0.034	0.108	7.42221e-18
USP3	4.43987e-22	-0.101002	0.101	0.214	7.57841e-18
SRP14	5.13947e-22	-0.128899	0.326	0.492	8.77256e-18
TIPARP	5.16407e-22	-0.106838	0.094	0.203	8.81454e-18
BIRC3	5.70224e-22	-0.150593	0.148	0.274	9.73315e-18
KLC1	5.75368e-22	-0.088411	0.06	0.152	9.82096e-18
TAP1	6.79277e-22	-0.15327	0.273	0.421	1.15946e-17
HNRNPL	7.12419e-22	-0.128566	0.168	0.302	1.21603e-17
FKBP3	7.41904e-22	-0.093038	0.072	0.171	1.26636e-17
ARGLU1	7.44754e-22	-0.166076	0.342	0.496	1.27122e-17
RBM25	7.5442e-22	-0.163827	0.329	0.487	1.28772e-17
GPR183	9.19256e-22	-0.0764173	0.033	0.105	1.56908e-17
TAPSAR1	9.4423e-22	-0.0981988	0.097	0.208	1.61171e-17
RNF125	9.8207e-22	-0.146452	0.213	0.355	1.6763e-17
PRPF19	1.18401e-21	-0.096938	0.079	0.18	2.02099e-17
AKAP8	1.18812e-21	-0.110425	0.108	0.221	2.02799e-17
PPIL4	1.60257e-21	-0.0796566	0.048	0.131	2.73543e-17
NSA2	1.61059e-21	-0.115681	0.154	0.284	2.74911e-17
RSL24D1	1.69344e-21	-0.119347	0.133	0.254	2.89054e-17
DIP2A	1.69603e-21	-0.165256	0.261	0.406	2.89496e-17
ITPR2	1.79522e-21	-0.153992	0.154	0.281	3.06426e-17
SYNCRIP	2.12638e-21	-0.146102	0.274	0.425	3.62951e-17
PTPN1	2.24283e-21	-0.128491	0.187	0.324	3.82829e-17
CTSD	2.26471e-21	-0.10595	0.122	0.242	3.86563e-17
ZC3H6	2.46453e-21	-0.102745	0.083	0.186	4.20671e-17
MAP2K7	2.46474e-21	-0.0919824	0.066	0.16	4.20706e-17
SH3BGRL3	2.51045e-21	-0.13922	0.306	0.463	4.28508e-17
DENND6A	2.63699e-21	-0.10398	0.097	0.205	4.50108e-17
TNRC6C-AS1	2.68847e-21	-0.0970128	0.061	0.151	4.58895e-17
ZNF770	3.02868e-21	-0.100848	0.076	0.174	5.16965e-17
SQRDL	3.17366e-21	-0.0734275	0.041	0.118	5.41712e-17
SYF2	3.31944e-21	-0.12234	0.145	0.27	5.66595e-17
TPR	3.74172e-21	-0.166884	0.369	0.522	6.38673e-17
CCT5	4.05662e-21	-0.106311	0.121	0.239	6.92425e-17
COX4I1	4.09029e-21	-0.14271	0.458	0.636	6.98171e-17
USP8	4.43705e-21	-0.115284	0.14	0.265	7.57359e-17
G3BP2	5.1743e-21	-0.143621	0.262	0.41	8.83201e-17
ETF1	5.19735e-21	-0.107544	0.124	0.242	8.87135e-17
PCNT	5.58538e-21	-0.184448	0.195	0.324	9.53369e-17
CCDC66	5.60417e-21	-0.0951162	0.086	0.189	9.56577e-17
TRGC2	5.65528e-21	0.200764	0.368	0.218	9.653e-17
BCAS2	5.78791e-21	-0.0860705	0.071	0.167	9.87938e-17
NDRG1	6.35267e-21	-0.112425	0.138	0.261	1.08434e-16
SAMSN1	7.36143e-21	-0.0945644	0.084	0.186	1.25652e-16
IL18R1	8.26743e-21	-0.103139	0.066	0.158	1.41117e-16
USP16	8.30371e-21	-0.122547	0.148	0.273	1.41736e-16
PAXBP1	8.77518e-21	-0.11973	0.115	0.227	1.49784e-16
BOD1L1	8.85148e-21	-0.186066	0.308	0.454	1.51086e-16
SHFM1	9.78568e-21	-0.0866703	0.071	0.167	1.67032e-16
NOL8	9.99527e-21	-0.120138	0.141	0.264	1.70609e-16
RBM17	1.1208e-20	-0.117332	0.158	0.286	1.91309e-16
RSRC1	1.15433e-20	-0.105225	0.091	0.194	1.97032e-16
PABPC4	1.2624e-20	-0.118126	0.138	0.258	2.15479e-16
NSRP1	1.27514e-20	-0.10022	0.092	0.196	2.17654e-16
FNBP1	1.35767e-20	-0.153196	0.519	0.692	2.3174e-16
SOCS3	1.45984e-20	-0.0868352	0.051	0.133	2.49181e-16
NEDD8	1.5786e-20	-0.121936	0.188	0.322	2.6945e-16
PDAP1	1.61103e-20	-0.106762	0.125	0.242	2.74986e-16
THOC2	1.73034e-20	-0.147521	0.232	0.373	2.95351e-16
RHOA	1.78179e-20	-0.140977	0.479	0.649	3.04133e-16
POLR2B	1.90909e-20	-0.131379	0.178	0.308	3.25862e-16
MYOM2	2.39331e-20	0.161915	0.128	0.027	4.08515e-16
PRPF31	2.45227e-20	-0.0821561	0.056	0.142	4.18578e-16
IFITM3	3.11325e-20	0.110205	0.132	0.03	5.314e-16
EXOC7	3.33895e-20	-0.0882199	0.077	0.174	5.69925e-16
TRA2A	3.6539e-20	-0.106947	0.114	0.225	6.23684e-16
AP1G2	4.14898e-20	-0.089747	0.059	0.146	7.0819e-16
GLUL	4.24029e-20	-0.122225	0.146	0.267	7.23775e-16
NFE2L2	4.28872e-20	-0.0851054	0.064	0.154	7.32042e-16
EIF3F	4.8323e-20	-0.114235	0.197	0.334	8.24825e-16
ANP32B	4.93801e-20	-0.133729	0.248	0.391	8.42869e-16
RAN	4.98155e-20	-0.106734	0.185	0.32	8.503e-16
STAT1	5.02071e-20	-0.263957	0.398	0.516	8.56985e-16
SLC25A3	6.59884e-20	-0.135675	0.293	0.443	1.12636e-15
SLC44A2	7.37027e-20	-0.12548	0.21	0.347	1.25803e-15
PHB2	7.68794e-20	-0.107351	0.127	0.243	1.31226e-15
C7orf55-LUC7L2	7.91099e-20	-0.0876759	0.061	0.148	1.35033e-15
CD3G	8.24273e-20	0.214582	0.521	0.389	1.40695e-15
BDP1	8.77116e-20	-0.162033	0.231	0.368	1.49715e-15
RASGRP2	1.05671e-19	-0.133316	0.182	0.311	1.8037e-15
APH1A	1.16857e-19	-0.0810661	0.063	0.151	1.99463e-15
SYNE1	1.38909e-19	0.198808	0.808	0.685	2.37104e-15
UQCRQ	1.3915e-19	-0.0993973	0.109	0.218	2.37516e-15
ID2	1.41822e-19	-0.157583	0.31	0.457	2.42075e-15
CWC25	1.49593e-19	-0.100035	0.093	0.194	2.55339e-15
PABPN1	1.53344e-19	-0.0741181	0.045	0.122	2.61743e-15
APOL3	1.60879e-19	-0.117476	0.186	0.317	2.74604e-15
TAF15	1.67849e-19	-0.137695	0.219	0.353	2.86501e-15
NDUFB8	1.70015e-19	0.0985517	0.114	0.021	2.90198e-15
ADAR	2.06919e-19	0.224835	0.604	0.493	3.53191e-15
ZFAND5	2.15796e-19	-0.115979	0.173	0.299	3.68342e-15
CLIP1	2.23722e-19	-0.126103	0.199	0.332	3.81871e-15
FBXO11	2.86773e-19	-0.0976628	0.092	0.192	4.89493e-15
AZIN1	3.16316e-19	-0.101758	0.122	0.234	5.3992e-15
GLG1	3.66164e-19	-0.146929	0.385	0.538	6.25005e-15
GBP1	3.97223e-19	-0.171269	0.233	0.361	6.7802e-15
NARF	4.08685e-19	-0.0952088	0.091	0.191	6.97585e-15
MPC2	5.37868e-19	-0.0740592	0.05	0.129	9.18086e-15
PDE7A	6.11415e-19	-0.10158	0.095	0.195	1.04363e-14
EIF3E	6.92891e-19	-0.114249	0.176	0.303	1.1827e-14
INPP4B	7.04523e-19	-0.119066	0.117	0.225	1.20255e-14
KDM5D	7.17129e-19	0.113912	0.132	0.034	1.22407e-14
HSPA9	7.22526e-19	-0.130124	0.246	0.383	1.23328e-14
UIMC1	7.5844e-19	-0.0823269	0.072	0.163	1.29458e-14
NIPA2	8.63955e-19	-0.0785281	0.066	0.153	1.47468e-14
SCML4	8.75263e-19	-0.103124	0.103	0.206	1.49399e-14
TSR3	9.12999e-19	-0.0723094	0.05	0.128	1.5584e-14
MED4	9.57588e-19	-0.089087	0.073	0.163	1.63451e-14
FAM21C	9.70772e-19	0.130032	0.193	0.077	1.65701e-14
ARAP1	9.73646e-19	-0.0740592	0.051	0.13	1.66192e-14
IGHG3	9.78879e-19	-0.237438	0.059	0.141	1.67085e-14
TNRC6B	1.02987e-18	-0.152445	0.306	0.453	1.75789e-14
MIDN	1.06977e-18	-0.0959198	0.081	0.175	1.82599e-14
TFIP11	1.08685e-18	-0.0640723	0.036	0.104	1.85515e-14
FBXO33	1.11891e-18	-0.0992693	0.105	0.209	1.90988e-14
CXorf38	1.16308e-18	-0.0735457	0.047	0.123	1.98527e-14
TRERF1	1.21597e-18	-0.109498	0.148	0.266	2.07555e-14
UHRF2	1.22182e-18	-0.101274	0.121	0.231	2.08552e-14
ZC3H12A	1.31344e-18	-0.0744822	0.044	0.117	2.24191e-14
DEK	1.56539e-18	-0.125666	0.321	0.471	2.67196e-14
MAT2A	1.67904e-18	-0.0815771	0.066	0.153	2.86596e-14
TSPAN14	1.70393e-18	-0.118956	0.251	0.392	2.90845e-14
ZC3H15	1.7226e-18	-0.104985	0.164	0.287	2.9403e-14
CCDC174	1.88813e-18	-0.0747486	0.043	0.115	3.22285e-14
UBAC2	1.91612e-18	-0.0831726	0.075	0.166	3.27063e-14
TBRG1	1.92457e-18	-0.0958643	0.084	0.179	3.28505e-14
RCSD1	2.03091e-18	-0.132558	0.314	0.461	3.46655e-14
IRF2BP2	2.14116e-18	-0.118513	0.177	0.3	3.65474e-14
JMY	2.21081e-18	-0.122498	0.119	0.226	3.77363e-14
LEO1	2.40109e-18	-0.0784747	0.056	0.136	4.09842e-14
CDV3	2.43943e-18	-0.132352	0.422	0.575	4.16387e-14
USP7	2.51505e-18	-0.139385	0.322	0.467	4.29294e-14
ZBTB10	2.63855e-18	-0.0879263	0.055	0.134	4.50374e-14
ITK	2.83586e-18	-0.132386	0.237	0.369	4.84053e-14
MRFAP1	2.95901e-18	-0.11592	0.145	0.258	5.05074e-14
IRF3	3.17087e-18	-0.0971864	0.114	0.22	5.41236e-14
CPNE1	3.30817e-18	-0.102576	0.132	0.243	5.64672e-14
NRD1	3.40015e-18	-0.135907	0.223	0.352	5.80371e-14
ZFX	3.5561e-18	-0.0912722	0.084	0.177	6.0699e-14
SNRPB	4.31668e-18	-0.0999664	0.112	0.216	7.36814e-14
USP22	4.63323e-18	-0.0797772	0.07	0.158	7.90845e-14
PHIP	4.64602e-18	-0.1485	0.252	0.384	7.93029e-14
HNRNPC	4.77911e-18	-0.125036	0.428	0.586	8.15747e-14
NACA	4.86358e-18	-0.112386	0.479	0.66	8.30164e-14
TNFAIP8	5.49732e-18	-0.124812	0.238	0.371	9.38338e-14
ETV3	5.82102e-18	-0.0974056	0.093	0.189	9.9359e-14
EIF5B	6.11514e-18	-0.130201	0.209	0.336	1.04379e-13
METAP2	6.43498e-18	-0.102508	0.137	0.25	1.09839e-13
REV1	6.53202e-18	-0.081757	0.079	0.171	1.11495e-13
NIPBL	7.17626e-18	-0.182574	0.399	0.535	1.22492e-13
NDUFB2	7.2856e-18	-0.106397	0.162	0.281	1.24358e-13
SNHG1	7.56201e-18	-0.0978345	0.104	0.204	1.29076e-13
UBE2I	8.23396e-18	-0.0977092	0.126	0.234	1.40545e-13
RILPL2	8.90213e-18	-0.0841376	0.071	0.158	1.5195e-13
FIP1L1	1.00987e-17	-0.0968041	0.113	0.216	1.72374e-13
NFKB1	1.01591e-17	-0.0899943	0.099	0.197	1.73405e-13
CD82	1.02097e-17	-0.0636453	0.038	0.105	1.74269e-13
CALM2	1.04069e-17	-0.123694	0.302	0.442	1.77636e-13
FAM104A	1.05327e-17	-0.0680815	0.046	0.118	1.79782e-13
ABI1	1.16138e-17	-0.109717	0.176	0.299	1.98236e-13
YTHDC1	1.18009e-17	-0.123103	0.23	0.361	2.01429e-13
DDX54	1.22587e-17	-0.0930284	0.098	0.196	2.09243e-13
GGA1	1.23001e-17	-0.0796086	0.065	0.148	2.0995e-13
TSR2	1.50198e-17	-0.093373	0.099	0.197	2.56372e-13
TXNIP	1.56744e-17	-0.225276	0.969	0.958	2.67547e-13
SAFB2	1.64518e-17	-0.113948	0.156	0.27	2.80817e-13
FBXO21	1.8808e-17	-0.0767476	0.057	0.136	3.21034e-13
NCOA7	1.91399e-17	-0.0909318	0.106	0.207	3.267e-13
USP15	2.01598e-17	-0.108296	0.197	0.324	3.44108e-13
UBA3	2.03892e-17	-0.0774295	0.066	0.15	3.48023e-13
TMEM14B	2.16906e-17	-0.0726696	0.051	0.125	3.70236e-13
FXR1	2.17358e-17	-0.10843	0.181	0.305	3.71008e-13
POMP	2.41181e-17	-0.0850958	0.093	0.188	4.11671e-13
OAS2	2.58665e-17	0.167993	0.273	0.15	4.41515e-13
H3F3A	2.59649e-17	0.102682	0.138	0.042	4.43194e-13
PRPF40A	2.65599e-17	-0.135022	0.259	0.389	4.53352e-13
2020-09-09	2.69689e-17	-0.122939	0.35	0.498	4.60333e-13
CNOT6L	2.8653e-17	-0.148825	0.3	0.434	4.89077e-13
RB1CC1	3.04103e-17	-0.116364	0.175	0.294	5.19073e-13
SLC2A4RG	3.18285e-17	-0.0743963	0.06	0.139	5.43281e-13
SAMHD1	3.72009e-17	-0.144189	0.521	0.676	6.34981e-13
UVRAG	4.1581e-17	-0.0841386	0.071	0.156	7.09747e-13
SEC11A	4.17265e-17	-0.0923727	0.124	0.23	7.1223e-13
AMMECR1L	4.35316e-17	-0.0661384	0.039	0.106	7.4304e-13
GNB1	4.7877e-17	-0.117595	0.337	0.482	8.17212e-13
MINOS1	4.87324e-17	-0.0653915	0.045	0.115	8.31813e-13
CLIC1	5.06794e-17	-0.0880478	0.126	0.233	8.65046e-13
S1PR4	5.22626e-17	-0.0896714	0.099	0.195	8.9207e-13
SMIM7	5.25769e-17	-0.0593269	0.036	0.101	8.97435e-13
2020-09-02	5.65822e-17	-0.123414	0.279	0.414	9.65801e-13
DNAJC21	6.35731e-17	-0.0912821	0.111	0.211	1.08513e-12
NAA50	7.2628e-17	-0.115839	0.205	0.329	1.23969e-12
CCT4	7.71136e-17	-0.0946621	0.124	0.228	1.31625e-12
PTP4A1	7.96515e-17	-0.087519	0.109	0.208	1.35957e-12
HIAT1	8.06666e-17	-0.0858035	0.095	0.189	1.3769e-12
HNRNPA0	8.4106e-17	-0.11643	0.188	0.306	1.43561e-12
ARF6	8.52509e-17	-0.104762	0.204	0.329	1.45515e-12
RSL1D1	8.98941e-17	-0.118199	0.206	0.327	1.5344e-12
TOB1	8.99424e-17	-0.126844	0.178	0.294	1.53523e-12
HSPD1	1.06707e-16	-0.113948	0.159	0.272	1.82138e-12
MAP3K8	1.2031e-16	-0.0857053	0.074	0.158	2.05356e-12
SBF1	1.23299e-16	-0.0835729	0.105	0.202	2.10459e-12
PSMD5-AS1	1.28626e-16	-0.0619772	0.04	0.106	2.19551e-12
SEC31B	1.31706e-16	-0.0653915	0.042	0.11	2.24809e-12
SBDS	1.46474e-16	-0.11628	0.188	0.307	2.50016e-12
PNPLA8	1.50931e-16	-0.083673	0.082	0.171	2.57624e-12
JOSD1	1.57539e-16	-0.107615	0.134	0.238	2.68903e-12
BCL2L11	1.61031e-16	-0.0907014	0.072	0.156	2.74863e-12
MCM3AP	1.68699e-16	-0.0946148	0.124	0.227	2.87952e-12
EZR	1.76181e-16	-0.155164	0.511	0.664	3.00723e-12
MGEA5	1.8451e-16	-0.159593	0.387	0.518	3.14939e-12
SP140L	1.86335e-16	-0.097495	0.104	0.199	3.18055e-12
EIF4A3	1.91273e-16	-0.0793035	0.07	0.152	3.26484e-12
TOMM20	1.92198e-16	-0.112216	0.177	0.293	3.28062e-12
TCP1	1.94811e-16	-0.105518	0.155	0.266	3.32523e-12
NAA15	2.22786e-16	-0.112483	0.142	0.249	3.80274e-12
QARS	2.31214e-16	-0.0847412	0.091	0.182	3.94659e-12
UBXN4	2.3843e-16	-0.117424	0.308	0.447	4.06976e-12
DBNL	2.38814e-16	-0.0993051	0.161	0.275	4.07632e-12
TRAM1	2.55475e-16	-0.119745	0.268	0.399	4.3607e-12
USP9Y	2.62797e-16	0.112644	0.155	0.057	4.48568e-12
PRKCH	2.64446e-16	-0.122379	0.367	0.51	4.51383e-12
BCL11B	2.72145e-16	-0.135409	0.348	0.482	4.64524e-12
GPR155	2.83892e-16	-0.067913	0.039	0.103	4.84575e-12
TBC1D15	3.02655e-16	-0.0894516	0.093	0.185	5.16601e-12
DIS3	3.10789e-16	-0.0957373	0.105	0.2	5.30486e-12
PPP1R15B	3.22492e-16	-0.109397	0.172	0.286	5.50462e-12
C12orf57	3.25648e-16	-0.101626	0.154	0.264	5.55848e-12
RASSF2	3.62303e-16	-0.0826113	0.085	0.174	6.18414e-12
MORC2	3.8298e-16	-0.0682202	0.045	0.113	6.53709e-12
DAZAP1	3.84072e-16	-0.0966989	0.147	0.255	6.55572e-12
UXT	4.58528e-16	-0.0871812	0.11	0.206	7.82662e-12
NOP14	4.97256e-16	-0.0907558	0.089	0.178	8.48766e-12
HNRNPAB	5.1707e-16	-0.100692	0.143	0.249	8.82587e-12
RASA1	5.95702e-16	-0.0768768	0.058	0.133	1.0168e-11
TOMM22	5.96434e-16	-0.0717709	0.059	0.134	1.01805e-11
ITFG2	5.98464e-16	-0.0671351	0.041	0.106	1.02152e-11
TFAM	6.19524e-16	-0.0871655	0.107	0.202	1.05746e-11
ATRX	6.55224e-16	-0.145303	0.427	0.562	1.1184e-11
GMFG	6.79192e-16	-0.120682	0.293	0.422	1.15931e-11
RNF213	6.97729e-16	0.158142	0.906	0.841	1.19095e-11
UGP2	7.50251e-16	-0.115054	0.211	0.331	1.2806e-11
CDK5RAP2	9.02963e-16	-0.100544	0.137	0.241	1.54127e-11
ANKRD11	9.31337e-16	-0.152636	0.33	0.455	1.5897e-11
SSRP1	9.51863e-16	-0.11237	0.189	0.305	1.62473e-11
BCL2	1.05046e-15	-0.174847	0.335	0.463	1.79303e-11
EPRS	1.06663e-15	-0.12695	0.231	0.35	1.82063e-11
RNF149	1.07063e-15	-0.104424	0.168	0.279	1.82746e-11
KTN1	1.10813e-15	-0.114352	0.346	0.488	1.89146e-11
PPP1CB	1.14853e-15	-0.0973631	0.18	0.295	1.96043e-11
PSIP1	1.16567e-15	-0.10902	0.247	0.375	1.98967e-11
SMC4	1.19332e-15	-0.119633	0.103	0.193	2.03689e-11
PPP1R12A	1.40903e-15	-0.125634	0.337	0.47	2.40507e-11
CKLF	1.41096e-15	-0.0663647	0.055	0.128	2.40837e-11
TRBC2	1.55396e-15	-0.151612	0.661	0.806	2.65245e-11
SPOP	1.60531e-15	-0.0836888	0.101	0.192	2.7401e-11
ZBTB43	1.62478e-15	-0.0921249	0.077	0.159	2.77333e-11
NAMPT	1.67802e-15	-0.0651081	0.042	0.107	2.86422e-11
CCAR1	1.74039e-15	-0.102129	0.152	0.259	2.97067e-11
HNRNPK	1.74457e-15	-0.117658	0.41	0.552	2.97781e-11
KDM5A	1.78024e-15	-0.137581	0.34	0.472	3.0387e-11
NBEAL1	1.80139e-15	0.098511	0.156	0.06	3.0748e-11
KPNA1	1.86766e-15	-0.0746665	0.07	0.15	3.18791e-11
HNRNPU	1.90208e-15	-0.127014	0.598	0.755	3.24665e-11
IWS1	1.9177e-15	-0.0975805	0.102	0.192	3.27333e-11
DDX6	1.95368e-15	-0.125456	0.428	0.568	3.33473e-11
EIF3G	1.96432e-15	-0.105635	0.193	0.308	3.3529e-11
IRAK1	2.22745e-15	-0.0961509	0.146	0.25	3.80203e-11
RRM1	2.28751e-15	-0.060899	0.04	0.103	3.90455e-11
PSMB4	2.30718e-15	-0.101752	0.22	0.342	3.93813e-11
MCM6	2.54778e-15	-0.0649263	0.047	0.114	4.34881e-11
FCGR3A	3.05345e-15	0.172342	0.395	0.257	5.21193e-11
UPF2	3.19985e-15	-0.10821	0.143	0.245	5.46182e-11
CFLAR	3.47151e-15	-0.120608	0.434	0.577	5.92551e-11
ALYREF	3.79845e-15	-0.0652795	0.052	0.121	6.48357e-11
ANAPC16	3.9135e-15	-0.099615	0.177	0.289	6.67996e-11
MIER1	3.97702e-15	-0.107085	0.204	0.321	6.78838e-11
L3MBTL3	3.98882e-15	-0.0822423	0.081	0.164	6.80851e-11
RYBP	4.12268e-15	-0.0900982	0.097	0.186	7.03701e-11
CEP85L	4.16363e-15	-0.109173	0.138	0.238	7.1069e-11
SLMAP	4.19736e-15	-0.0841677	0.118	0.214	7.16447e-11
PARP14	4.20107e-15	-0.130868	0.259	0.381	7.17081e-11
POLR2G	4.36666e-15	-0.0715313	0.077	0.158	7.45346e-11
PCM1	4.56564e-15	-0.14102	0.359	0.486	7.79309e-11
PRPF6	4.61458e-15	-0.0968761	0.139	0.24	7.87663e-11
PUF60	4.95792e-15	-0.0977517	0.135	0.235	8.46268e-11
DHX40	5.33323e-15	-0.0662473	0.058	0.131	9.10329e-11
EXOSC9	5.49882e-15	-0.0701299	0.063	0.138	9.38594e-11
STAG2	6.21292e-15	-0.127798	0.303	0.427	1.06048e-10
TTC37	6.3235e-15	-0.102627	0.177	0.289	1.07936e-10
METTL17	6.90376e-15	-0.0574628	0.045	0.11	1.1784e-10
ERCC5	6.90573e-15	-0.0743425	0.085	0.17	1.17874e-10
TWISTNB	6.9552e-15	-0.0702642	0.063	0.137	1.18718e-10
HSP90B1	7.06361e-15	-0.166707	0.579	0.704	1.20569e-10
KDM6A	7.95842e-15	-0.0769619	0.079	0.16	1.35842e-10
AKT1	7.97887e-15	-0.0701371	0.078	0.16	1.36191e-10
PSMB9	8.08544e-15	-0.129558	0.355	0.48	1.3801e-10
ESF1	8.34403e-15	-0.0709633	0.05	0.117	1.42424e-10
ARHGAP12	8.48792e-15	-0.0741047	0.083	0.166	1.4488e-10
TNRC6A	8.55458e-15	-0.101523	0.149	0.252	1.46018e-10
UCHL5	8.91609e-15	-0.0776824	0.097	0.185	1.52189e-10
SRP54	9.03661e-15	-0.0709412	0.073	0.152	1.54246e-10
PREX1	9.09861e-15	-0.1089	0.317	0.447	1.55304e-10
NDUFA13	9.28663e-15	-0.0811463	0.084	0.166	1.58514e-10
CHPF2	9.55997e-15	-0.0579652	0.043	0.106	1.63179e-10
NIN	9.97764e-15	-0.14065	0.376	0.512	1.70308e-10
NR1D2	1.03032e-14	-0.119316	0.161	0.263	1.75866e-10
RTCA	1.03763e-14	-0.0717709	0.056	0.126	1.77112e-10
OS9	1.12739e-14	-0.0917954	0.166	0.276	1.92435e-10
MOB2	1.16012e-14	-0.0674877	0.055	0.124	1.98021e-10
NPC1	1.16476e-14	-0.0802452	0.065	0.139	1.98814e-10
GIMAP1	1.24951e-14	-0.107386	0.174	0.28	2.13278e-10
METTL16	1.31529e-14	-0.069965	0.084	0.168	2.24506e-10
RNF44	1.35877e-14	-0.083808	0.109	0.2	2.31928e-10
CERS2	1.39167e-14	-0.063154	0.046	0.11	2.37543e-10
RBM5	1.43038e-14	-0.113855	0.196	0.305	2.44151e-10
RAB3GAP2	1.54115e-14	-0.0977729	0.142	0.242	2.63059e-10
DARS	1.61669e-14	-0.0774838	0.103	0.192	2.75953e-10
RNGTT	1.62267e-14	-0.06793	0.056	0.126	2.76974e-10
PPID	1.65443e-14	-0.0675587	0.065	0.139	2.82395e-10
TMEM63A	1.66614e-14	-0.0810173	0.08	0.16	2.84393e-10
EXOC1	1.75665e-14	-0.0693193	0.058	0.129	2.99843e-10
GPCPD1	1.83843e-14	-0.0879775	0.108	0.198	3.13801e-10
CASK	1.94638e-14	-0.0691023	0.047	0.112	3.32227e-10
POLR2C	1.96972e-14	-0.0723217	0.07	0.146	3.36212e-10
LRCH4	2.06019e-14	-0.0700627	0.074	0.152	3.51654e-10
RAB9A	2.11205e-14	-0.0599023	0.043	0.105	3.60505e-10
TSR1	2.11209e-14	-0.0725916	0.059	0.13	3.60513e-10
PSMA4	2.11862e-14	-0.103973	0.177	0.283	3.61628e-10
ORAI2	2.15799e-14	-0.0658069	0.047	0.112	3.68347e-10
RNF19A	2.27584e-14	-0.117122	0.177	0.282	3.88462e-10
THUMPD1	2.28607e-14	-0.0965232	0.218	0.336	3.9021e-10
STT3B	2.42802e-14	-0.107422	0.191	0.3	4.14439e-10
CDK9	2.5797e-14	-0.0733678	0.075	0.153	4.4033e-10
KPNA5	2.62632e-14	-0.0782904	0.086	0.168	4.48286e-10
CCDC84	2.63407e-14	-0.0585102	0.042	0.104	4.49609e-10
YY1	2.67668e-14	-0.122387	0.321	0.447	4.56883e-10
FBXW5	2.68271e-14	-0.102966	0.218	0.333	4.57911e-10
SRP72	2.93002e-14	-0.0973332	0.193	0.306	5.00125e-10
REXO2	2.94718e-14	-0.0623711	0.059	0.13	5.03054e-10
SNRK	3.25104e-14	-0.108304	0.243	0.36	5.5492e-10
CEP95	3.30658e-14	-0.0711755	0.062	0.134	5.64401e-10
C10orf118	3.32019e-14	-0.0992287	0.151	0.252	5.66723e-10
ETFA	3.40405e-14	-0.0750536	0.075	0.152	5.81038e-10
PRPS1	3.58801e-14	-0.070666	0.066	0.14	6.12438e-10
GPBP1	3.61603e-14	-0.105743	0.279	0.401	6.1722e-10
CNTRL	3.6929e-14	-0.145615	0.222	0.33	6.30342e-10
PHF20L1	3.83151e-14	-0.107058	0.153	0.253	6.54e-10
C16orf72	3.83406e-14	-0.0791476	0.089	0.172	6.54436e-10
GNAS	3.92842e-14	-0.111439	0.6	0.752	6.70542e-10
VGLL4	4.00964e-14	-0.0624355	0.043	0.104	6.84405e-10
HSPE1	4.09607e-14	-0.0743659	0.079	0.158	6.99158e-10
VTI1B	4.20709e-14	-0.0806883	0.088	0.17	7.18108e-10
NUB1	4.37743e-14	-0.112339	0.227	0.339	7.47184e-10
RBM23	4.37911e-14	-0.107016	0.146	0.244	7.4747e-10
TBC1D14	4.40734e-14	-0.0643286	0.057	0.126	7.52289e-10
MARK3	4.6399e-14	-0.102496	0.189	0.297	7.91985e-10
CD2AP	5.21832e-14	-0.0853254	0.1	0.186	8.90716e-10
HNRNPH3	5.44967e-14	-0.101057	0.229	0.344	9.30203e-10
HADHA	5.47287e-14	-0.10904	0.232	0.347	9.34165e-10
MAX	5.5159e-14	-0.0817162	0.111	0.2	9.41509e-10
ITGA4	5.56841e-14	-0.130613	0.428	0.555	9.50471e-10
DDX5	5.88991e-14	-0.128827	0.868	0.936	1.00535e-09
GYPC	6.30248e-14	-0.0729561	0.091	0.175	1.07577e-09
2020-09-01	6.3956e-14	-0.0790152	0.105	0.193	1.09166e-09
BMS1	6.59862e-14	-0.0881647	0.114	0.204	1.12632e-09
ERP29	6.78261e-14	-0.111181	0.276	0.395	1.15772e-09
PPP3CA	6.84342e-14	-0.0955133	0.181	0.289	1.1681e-09
GSPT1	6.89827e-14	-0.110044	0.207	0.318	1.17747e-09
CCDC93	6.93499e-14	-0.0762087	0.098	0.184	1.18373e-09
ARFGEF2	7.10516e-14	-0.0886159	0.117	0.207	1.21278e-09
MAP2K1	7.27291e-14	-0.0784147	0.087	0.168	1.24141e-09
CD247	7.31016e-14	-0.113446	0.422	0.556	1.24777e-09
TFRC	7.47282e-14	-0.0735545	0.076	0.153	1.27554e-09
TBCD	7.63461e-14	-0.0738309	0.063	0.134	1.30315e-09
DNAAF2	9.03923e-14	-0.0590988	0.045	0.107	1.54291e-09
TCIRG1	9.62325e-14	-0.0809703	0.098	0.183	1.64259e-09
KIF5B	9.71364e-14	-0.134033	0.291	0.402	1.65802e-09
LMBR1L	9.7677e-14	-0.0614959	0.058	0.126	1.66725e-09
CEP290	9.78051e-14	-0.104792	0.093	0.175	1.66944e-09
TMEM245	9.80899e-14	-0.0921032	0.093	0.175	1.6743e-09
BHLHE40	9.9706e-14	-0.145968	0.269	0.379	1.70188e-09
ARRDC2	1.01058e-13	-0.0771511	0.091	0.174	1.72497e-09
WHAMM	1.01171e-13	-0.0824545	0.121	0.212	1.72688e-09
TPP2	1.07112e-13	-0.100216	0.172	0.276	1.8283e-09
SIVA1	1.08635e-13	-0.0743834	0.081	0.159	1.8543e-09
TNPO2	1.14423e-13	-0.060983	0.043	0.103	1.95308e-09
GUSB	1.17354e-13	-0.0604175	0.06	0.129	2.00312e-09
ZNF638	1.20088e-13	-0.124703	0.222	0.329	2.04979e-09
FBXO32	1.38826e-13	-0.0869486	0.1	0.184	2.36962e-09
C1QBP	1.39576e-13	-0.0708563	0.081	0.159	2.38242e-09
HNRNPH2	1.48898e-13	-0.0693378	0.082	0.161	2.54155e-09
SRF	1.50375e-13	-0.0648135	0.073	0.148	2.56674e-09
RAC2	1.65239e-13	-0.0978862	0.427	0.563	2.82046e-09
CWF19L2	1.67366e-13	-0.0830842	0.09	0.17	2.85676e-09
CFDP1	1.70834e-13	-0.0587494	0.047	0.109	2.91596e-09
HNRNPA1	1.71415e-13	-0.106367	0.423	0.561	2.92588e-09
RFC1	1.93313e-13	-0.0964271	0.16	0.26	3.29966e-09
MIAT	2.04777e-13	-0.117244	0.147	0.243	3.49535e-09
AMD1	2.04902e-13	-0.080085	0.129	0.222	3.49748e-09
DNAJB2	2.07525e-13	-0.0633863	0.06	0.129	3.54225e-09
ZCCHC17	2.07794e-13	-0.0751334	0.071	0.144	3.54683e-09
HNRNPA2B1	2.1484e-13	-0.142064	0.784	0.877	3.66711e-09
PSPC1	2.15729e-13	-0.0837024	0.116	0.204	3.68228e-09
KRAS	2.30058e-13	-0.0927716	0.139	0.233	3.92686e-09
COX14	2.32113e-13	-0.0692333	0.074	0.149	3.96193e-09
MSH6	2.3524e-13	-0.0593103	0.054	0.119	4.01532e-09
UQCRH	2.56707e-13	-0.0842031	0.182	0.289	4.38174e-09
USP48	2.64828e-13	-0.101583	0.169	0.269	4.52034e-09
RTF1	2.66857e-13	-0.111107	0.192	0.295	4.55498e-09
CCR5	2.95856e-13	-0.110394	0.126	0.215	5.04997e-09
SNHG15	3.0135e-13	-0.0618495	0.049	0.111	5.14375e-09
PSMB6	3.01493e-13	-0.0841932	0.16	0.26	5.14618e-09
FGFR1OP2	3.16897e-13	-0.104064	0.199	0.303	5.40912e-09
GTF2B	3.2761e-13	-0.0521338	0.043	0.102	5.59198e-09
MRPL10	3.27776e-13	-0.0686682	0.065	0.134	5.59481e-09
YIPF5	3.4214e-13	-0.0593984	0.061	0.129	5.83998e-09
WWP1	3.45289e-13	-0.0873175	0.135	0.228	5.89373e-09
STX16	3.47526e-13	-0.0875072	0.147	0.243	5.93191e-09
PBXIP1	3.77162e-13	-0.11577	0.264	0.379	6.43778e-09
ENO1	4.13734e-13	-0.107225	0.44	0.57	7.06203e-09
KDM5C	4.16644e-13	-0.0797537	0.089	0.168	7.11169e-09
PSMC2	4.19042e-13	-0.079378	0.11	0.195	7.15263e-09
RBMX	4.20892e-13	-0.0995475	0.25	0.364	7.1842e-09
DGKA	4.32874e-13	-0.104901	0.17	0.271	7.38873e-09
MYL12A	4.37463e-13	-0.109621	0.561	0.698	7.46705e-09
LTV1	4.43259e-13	-0.0694478	0.073	0.146	7.56599e-09
MED10	4.44047e-13	-0.0770334	0.123	0.213	7.57943e-09
DHX9	4.53253e-13	-0.106935	0.266	0.382	7.73658e-09
SERP1	4.58039e-13	-0.0914977	0.21	0.319	7.81827e-09
LSG1	4.59966e-13	-0.0729068	0.093	0.174	7.85116e-09
PPWD1	4.646e-13	-0.0739949	0.085	0.163	7.93026e-09
IARS	4.65154e-13	-0.0915133	0.13	0.221	7.93971e-09
EFR3A	4.87401e-13	-0.0910686	0.145	0.24	8.31945e-09
MSN	4.98047e-13	0.16895	0.718	0.667	8.50116e-09
PSMD13	5.10871e-13	-0.0757808	0.124	0.214	8.72005e-09
SOD1	5.13144e-13	-0.108994	0.308	0.429	8.75885e-09
S100A9	5.54442e-13	-0.385459	0.18	0.276	9.46378e-09
EFHD2	5.5853e-13	0.177418	0.534	0.431	9.53355e-09
WDR43	5.64149e-13	-0.0745062	0.109	0.194	9.62947e-09
CDKN1B	5.82511e-13	-0.0994474	0.191	0.295	9.94288e-09
CREBRF	5.98879e-13	-0.0954626	0.176	0.278	1.02223e-08
DNAJB9	6.03578e-13	-0.0649263	0.052	0.115	1.03025e-08
EMC7	6.26786e-13	-0.0673875	0.076	0.15	1.06986e-08
SRSF6	6.5889e-13	-0.0855031	0.168	0.269	1.12466e-08
CCDC109B	6.74367e-13	-0.0764954	0.111	0.197	1.15108e-08
ZBTB21	6.83092e-13	-0.0651352	0.054	0.117	1.16597e-08
RABL6	6.86065e-13	-0.0832649	0.131	0.222	1.17104e-08
PTGER2	6.88336e-13	-0.108468	0.187	0.29	1.17492e-08
ZNF292	7.00341e-13	-0.119771	0.229	0.335	1.19541e-08
LIMS1	7.44946e-13	-0.0757854	0.084	0.16	1.27155e-08
CCNI	7.52353e-13	-0.120839	0.455	0.585	1.28419e-08
SRRT	7.64771e-13	-0.0893189	0.18	0.283	1.30539e-08
HCG18	7.66186e-13	-0.0792573	0.105	0.188	1.3078e-08
ATG16L2	8.05643e-13	-0.0628054	0.067	0.137	1.37515e-08
APPL1	8.23926e-13	-0.0845156	0.129	0.218	1.40636e-08
PPTC7	8.35956e-13	-0.0929511	0.124	0.21	1.42689e-08
BRD1	9.03472e-13	-0.0795513	0.095	0.175	1.54214e-08
CCT2	9.20902e-13	-0.0784716	0.146	0.241	1.57189e-08
KIAA0020	9.52989e-13	-0.0628777	0.05	0.111	1.62666e-08
GHITM	9.61702e-13	-0.0924625	0.218	0.325	1.64153e-08
RHOH	1.00912e-12	-0.0917773	0.152	0.247	1.72247e-08
ATR	1.02829e-12	-0.0868005	0.114	0.198	1.7552e-08
CDC5L	1.05647e-12	-0.0894178	0.14	0.232	1.80328e-08
TMBIM6	1.09828e-12	0.170872	0.672	0.613	1.87465e-08
KIF13B	1.11821e-12	-0.0803015	0.097	0.178	1.90867e-08
RIF1	1.14177e-12	-0.103259	0.166	0.262	1.94889e-08
CCM2	1.20423e-12	-0.0805957	0.12	0.206	2.05549e-08
PYCR2	1.32269e-12	-0.0575066	0.053	0.116	2.2577e-08
ARNTL	1.34893e-12	-0.0734253	0.082	0.156	2.30249e-08
HINT1	1.35475e-12	-0.0853908	0.177	0.278	2.31242e-08
SFSWAP	1.362e-12	-0.0806618	0.17	0.271	2.3248e-08
COX7A2	1.38532e-12	-0.0916076	0.203	0.308	2.3646e-08
CNOT8	1.48436e-12	-0.0684104	0.086	0.162	2.53366e-08
CDKN2D	1.51471e-12	-0.0780726	0.107	0.189	2.58546e-08
C4orf3	1.60273e-12	-0.0981698	0.225	0.33	2.7357e-08
SRSF11	1.60806e-12	-0.114471	0.408	0.533	2.7448e-08
PAPD5	1.62492e-12	-0.0863739	0.104	0.185	2.77358e-08
XRN1	1.63352e-12	-0.105852	0.26	0.372	2.78826e-08
NFATC2IP	1.66462e-12	-0.0916309	0.142	0.233	2.84133e-08
ETFB	1.70889e-12	-0.0596124	0.055	0.118	2.91691e-08
ASCC3	1.75464e-12	-0.0936679	0.133	0.222	2.99499e-08
C9orf41	1.7891e-12	-0.0683553	0.079	0.153	3.05381e-08
POLG	1.80461e-12	-0.0767914	0.117	0.202	3.08029e-08
HECTD1	1.91713e-12	-0.115768	0.229	0.332	3.27236e-08
CCDC25	1.92166e-12	-0.0627784	0.072	0.142	3.28008e-08
AFG3L2	1.95664e-12	-0.0627031	0.067	0.136	3.33979e-08
SF3A3	1.99167e-12	-0.0855173	0.15	0.243	3.39959e-08
BCLAF1	2.02014e-12	-0.109998	0.326	0.442	3.44817e-08
ARID5B	2.05469e-12	-0.0876698	0.146	0.24	3.50716e-08
LRCH1	2.13311e-12	-0.0554806	0.045	0.102	3.64101e-08
ARF4	2.18286e-12	-0.0538038	0.051	0.112	3.72592e-08
CWC27	2.21834e-12	-0.070677	0.076	0.147	3.78649e-08
PIN1	2.3011e-12	-0.0702692	0.08	0.153	3.92774e-08
DDX10	2.3944e-12	-0.0637297	0.052	0.113	4.08699e-08
RAB27A	2.40548e-12	-0.111351	0.266	0.375	4.10592e-08
SNHG8	2.51473e-12	-0.0693694	0.071	0.14	4.29239e-08
RAB1A	2.61812e-12	-0.0807351	0.101	0.18	4.46886e-08
CUL5	2.71892e-12	-0.0716644	0.084	0.158	4.64093e-08
CWC15	2.83644e-12	-0.0731872	0.108	0.19	4.84152e-08
PSMA3	2.93537e-12	-0.0735262	0.111	0.194	5.01039e-08
VPS37B	3.15097e-12	-0.0604595	0.064	0.131	5.3784e-08
TBC1D10C	3.16719e-12	-0.0993707	0.279	0.394	5.40608e-08
IK	3.18901e-12	-0.10494	0.262	0.372	5.44332e-08
SSBP4	3.19515e-12	-0.0747476	0.106	0.187	5.4538e-08
NUGGC	3.23674e-12	-0.0585935	0.047	0.105	5.52478e-08
SURF4	3.31996e-12	-0.0818794	0.162	0.258	5.66684e-08
SNAP23	3.39806e-12	-0.0599297	0.064	0.13	5.80015e-08
PIK3CA	3.41722e-12	-0.078881	0.085	0.158	5.83285e-08
PSMB1	3.46686e-12	-0.0842204	0.215	0.321	5.91759e-08
CARD11	3.50033e-12	-0.0868983	0.173	0.271	5.97471e-08
TAX1BP1	3.59972e-12	-0.103768	0.28	0.391	6.14436e-08
RAD21	3.68252e-12	-0.0982748	0.377	0.501	6.2857e-08
FAM13B	3.78682e-12	-0.0918762	0.14	0.229	6.46371e-08
ING3	3.83869e-12	-0.0632165	0.064	0.13	6.55226e-08
MED6	3.93361e-12	-0.0587037	0.047	0.104	6.71427e-08
ATHL1	3.99229e-12	-0.0875072	0.145	0.235	6.81444e-08
SLC4A7	4.0515e-12	-0.0774567	0.111	0.193	6.9155e-08
FCRL3	4.28856e-12	0.124504	0.187	0.097	7.32015e-08
DGKQ	4.4289e-12	-0.0636055	0.07	0.138	7.5597e-08
SSB	4.44817e-12	-0.0787263	0.134	0.222	7.59259e-08
YPEL1	4.50666e-12	-0.0560263	0.049	0.108	7.69243e-08
PSMB8	4.67114e-12	-0.0922488	0.299	0.415	7.97316e-08
ACTR1B	4.71093e-12	-0.0654914	0.084	0.158	8.04108e-08
ZNF24	4.75522e-12	-0.094628	0.21	0.313	8.11669e-08
GADD45GIP1	4.90926e-12	-0.081302	0.123	0.207	8.37962e-08
CTNNBL1	4.91434e-12	-0.0663943	0.074	0.144	8.38829e-08
SEC62	4.95035e-12	-0.0981148	0.26	0.37	8.44976e-08
R3HCC1L	4.97613e-12	-0.0525505	0.055	0.117	8.49375e-08
UBE2E1	5.08408e-12	-0.055342	0.056	0.118	8.67801e-08
SUCLG2	5.11731e-12	-0.0626503	0.076	0.147	8.73473e-08
CCDC59	5.36668e-12	-0.0715397	0.103	0.183	9.16039e-08
TOPORS	5.38136e-12	-0.0698219	0.07	0.138	9.18544e-08
DDX51	5.39756e-12	-0.058073	0.063	0.128	9.2131e-08
PSMD14	5.56298e-12	-0.0664369	0.072	0.14	9.49544e-08
MCM7	5.75772e-12	-0.0655237	0.085	0.159	9.82786e-08
RBM27	5.96067e-12	-0.0982311	0.199	0.298	1.01743e-07
HTATSF1	6.14066e-12	-0.0851703	0.173	0.27	1.04815e-07
ARFGAP2	6.336e-12	-0.0621172	0.069	0.136	1.08149e-07
RBPJ	6.50902e-12	-0.0671313	0.077	0.148	1.11103e-07
MEA1	6.53215e-12	-0.0541471	0.051	0.11	1.11497e-07
SLC25A36	7.14909e-12	-0.0804979	0.117	0.199	1.22028e-07
AHCYL1	7.50815e-12	-0.0744325	0.112	0.194	1.28157e-07
GALNT7	7.53794e-12	-0.0686378	0.053	0.113	1.28665e-07
DYNLL2	7.69793e-12	-0.107934	0.317	0.429	1.31396e-07
TRADD	7.7216e-12	-0.0650206	0.075	0.144	1.318e-07
PSMD3	7.75658e-12	-0.0635693	0.07	0.138	1.32397e-07
SREK1	7.97479e-12	-0.0962312	0.15	0.239	1.36122e-07
NSUN2	8.22962e-12	-0.0742625	0.097	0.174	1.40471e-07
ATXN7	8.24676e-12	-0.073658	0.136	0.226	1.40764e-07
APEX1	8.70414e-12	-0.0702882	0.103	0.182	1.48571e-07
CAPN7	8.73466e-12	-0.0721835	0.087	0.16	1.49092e-07
EML4	8.79723e-12	-0.0917885	0.224	0.33	1.5016e-07
CFH	9.23368e-12	-0.0833979	0.057	0.117	1.5761e-07
GOLGA8A	9.54087e-12	0.111519	0.258	0.157	1.62853e-07
KDM3A	9.54858e-12	-0.0836378	0.148	0.238	1.62985e-07
UPF1	9.81684e-12	-0.0731228	0.092	0.167	1.67564e-07
XPC	1.02785e-11	-0.0856574	0.115	0.196	1.75444e-07
MAP4K5	1.05509e-11	-0.0740839	0.095	0.17	1.80092e-07
OSBPL5	1.06489e-11	-0.0608187	0.05	0.108	1.81766e-07
TMC8	1.07369e-11	-0.107963	0.315	0.429	1.83269e-07
UBE2K	1.08538e-11	-0.0759424	0.153	0.245	1.85263e-07
SRRM2	1.09391e-11	0.17374	0.636	0.562	1.8672e-07
MRPL22	1.12007e-11	-0.0535986	0.05	0.108	1.91185e-07
TRIM56	1.17388e-11	-0.0622684	0.06	0.122	2.0037e-07
TECPR1	1.19179e-11	-0.0659364	0.079	0.15	2.03426e-07
DBF4	1.20831e-11	-0.055532	0.049	0.107	2.06246e-07
ARFGAP1	1.2967e-11	-0.0609685	0.067	0.133	2.21333e-07
MRPL20	1.32168e-11	-0.0564234	0.06	0.122	2.25598e-07
IFI44L	1.33207e-11	0.133059	0.177	0.091	2.27372e-07
IPO7	1.38622e-11	-0.0736739	0.133	0.22	2.36615e-07
EXOC5	1.40198e-11	-0.0660973	0.103	0.182	2.39304e-07
SART1	1.4188e-11	-0.0721358	0.095	0.171	2.42175e-07
IBTK	1.47149e-11	-0.0825911	0.131	0.215	2.51168e-07
MYCBP2	1.52752e-11	-0.123144	0.452	0.57	2.60732e-07
DNAJC1	1.54993e-11	-0.085192	0.134	0.218	2.64558e-07
DDB1	1.55499e-11	-0.0837489	0.154	0.245	2.65421e-07
SRSF4	1.60279e-11	-0.0913468	0.193	0.291	2.7358e-07
CBX6	1.61735e-11	-0.0687069	0.103	0.181	2.76065e-07
MLLT10	1.66044e-11	-0.0770085	0.118	0.199	2.8342e-07
TM9SF3	1.67864e-11	-0.09091	0.225	0.327	2.86528e-07
RICTOR	1.68678e-11	-0.0891262	0.155	0.245	2.87916e-07
DCTN3	1.76147e-11	-0.0622189	0.072	0.139	3.00665e-07
NBEAL2	1.81525e-11	-0.0743644	0.139	0.227	3.09845e-07
CST7	1.98097e-11	0.136229	0.361	0.255	3.38131e-07
FBL	2.07892e-11	-0.0839799	0.17	0.263	3.5485e-07
NGDN	2.11124e-11	-0.0557393	0.061	0.124	3.60367e-07
GTDC1	2.11515e-11	-0.0614365	0.053	0.111	3.61035e-07
RAF1	2.1167e-11	-0.0633982	0.098	0.174	3.61299e-07
HAUS3	2.11982e-11	-0.065045	0.092	0.166	3.61831e-07
BNIP2	2.14155e-11	-0.0729158	0.174	0.27	3.65541e-07
ABCB1	2.20839e-11	-0.0562775	0.056	0.116	3.7695e-07
TP53BP2	2.23103e-11	-0.073848	0.103	0.18	3.80815e-07
BTN3A3	2.27423e-11	0.128539	0.35	0.243	3.88188e-07
NECAP2	2.28606e-11	-0.06691	0.101	0.178	3.90207e-07
PLIN2	2.35337e-11	-0.0739572	0.095	0.169	4.01696e-07
FAM129A	2.37468e-11	-0.126269	0.29	0.395	4.05334e-07
CALM1	2.386e-11	-0.110251	0.88	0.946	4.07266e-07
CDC14A	2.39515e-11	-0.0723128	0.085	0.156	4.08827e-07
APOBR	2.44632e-11	-0.105866	0.145	0.229	4.17562e-07
DCTN2	2.5186e-11	-0.0592425	0.067	0.132	4.29899e-07
UFL1	2.53524e-11	-0.0672788	0.085	0.157	4.32741e-07
PHF3	2.59857e-11	-0.102606	0.27	0.377	4.4355e-07
TSPYL1	2.60388e-11	-0.063539	0.104	0.182	4.44457e-07
TUFM	2.65496e-11	-0.076967	0.14	0.226	4.53176e-07
SCAPER	2.78951e-11	-0.0688592	0.073	0.139	4.76142e-07
ZNF644	2.84542e-11	-0.0911006	0.123	0.203	4.85684e-07
KRT10	2.87369e-11	-0.0668922	0.082	0.152	4.9051e-07
RBAK	2.91673e-11	-0.0619768	0.066	0.13	4.97857e-07
RARRES3	2.92999e-11	-0.0987035	0.328	0.438	5.0012e-07
ENY2	3.11859e-11	-0.0666351	0.075	0.142	5.32312e-07
THRAP3	3.18797e-11	-0.0872825	0.315	0.433	5.44155e-07
CHD8	3.43055e-11	-0.109199	0.247	0.345	5.8556e-07
H2AFZ	3.46657e-11	-0.0865898	0.173	0.264	5.9171e-07
IDH2	3.4814e-11	-0.0787419	0.153	0.242	5.9424e-07
SKIL	3.57235e-11	-0.0570137	0.052	0.109	6.09765e-07
ZNF143	3.71575e-11	-0.0602582	0.061	0.123	6.34241e-07
HLA-E	3.74853e-11	-0.0832004	0.991	0.994	6.39837e-07
LSM6	3.79059e-11	-0.0521536	0.048	0.104	6.47017e-07
CITED2	3.80292e-11	-0.0793516	0.101	0.176	6.4912e-07
YTHDC2	3.86648e-11	-0.0736129	0.094	0.167	6.59969e-07
ZNF394	3.88532e-11	-0.0778216	0.129	0.211	6.63185e-07
PIP4K2A	3.89401e-11	-0.108554	0.532	0.654	6.64669e-07
EID1	3.94582e-11	-0.0955521	0.269	0.373	6.73511e-07
NXF1	3.95695e-11	-0.0748775	0.118	0.198	6.75412e-07
KIF3A	3.95901e-11	-0.0560766	0.047	0.102	6.75763e-07
UBA5	3.98991e-11	-0.0607858	0.065	0.128	6.81038e-07
GTF2F1	4.16681e-11	-0.0817809	0.158	0.247	7.11232e-07
PEBP1	4.24273e-11	-0.0816428	0.187	0.282	7.24192e-07
ACSS1	4.3678e-11	-0.062461	0.07	0.135	7.45539e-07
VDAC1	4.45564e-11	-0.0572984	0.068	0.132	7.60534e-07
ZMYND8	4.54654e-11	-0.0745567	0.129	0.211	7.76049e-07
ARID5A	4.57613e-11	-0.056814	0.063	0.125	7.811e-07
ANXA2	4.67209e-11	-0.0915007	0.246	0.346	7.9748e-07
GIMAP5	4.7192e-11	-0.0868536	0.187	0.282	8.05521e-07
IGF2R	4.90491e-11	-0.112683	0.362	0.471	8.37218e-07
FBXW7	4.92417e-11	-0.122964	0.226	0.318	8.40506e-07
GPATCH4	4.97672e-11	-0.0699297	0.071	0.136	8.49476e-07
ERBB2IP	4.97858e-11	-0.105254	0.448	0.572	8.49793e-07
SPOCK2	5.17089e-11	-0.113946	0.497	0.619	8.82619e-07
MAST3	5.38592e-11	-0.0551418	0.055	0.113	9.19323e-07
USP14	5.64557e-11	-0.0786193	0.115	0.192	9.63642e-07
PLRG1	5.80342e-11	-0.0586755	0.056	0.114	9.90586e-07
SURF1	6.12705e-11	-0.0580334	0.064	0.125	1.04583e-06
MACF1	6.47234e-11	0.143683	0.83	0.763	1.10476e-06
ZAP70	6.69334e-11	-0.105096	0.309	0.416	1.14249e-06
NDUFA5	6.79407e-11	-0.0679222	0.097	0.17	1.15968e-06
HOPX	6.81054e-11	-0.0769557	0.165	0.256	1.16249e-06
EPC2	6.97783e-11	-0.0768745	0.114	0.191	1.19105e-06
LEMD3	6.98508e-11	-0.0631002	0.096	0.17	1.19228e-06
IPCEF1	6.98836e-11	-0.0769226	0.143	0.229	1.19284e-06
WAC-AS1	7.00737e-11	-0.0504823	0.049	0.104	1.19609e-06
AKIRIN1	7.02548e-11	-0.0821314	0.169	0.259	1.19918e-06
B4GALT5	7.09109e-11	-0.0739891	0.115	0.193	1.21038e-06
ZC3H13	7.26136e-11	-0.0976886	0.248	0.348	1.23944e-06
TRIM52	7.48881e-11	-0.0688853	0.069	0.132	1.27827e-06
RABGAP1	7.52923e-11	-0.0559963	0.073	0.139	1.28517e-06
DIMT1	7.68666e-11	0.0835583	0.132	0.059	1.31204e-06
CD28	7.71199e-11	-0.0506619	0.05	0.106	1.31636e-06
TYMP	7.97638e-11	-0.0662267	0.07	0.134	1.36149e-06
ALDH9A1	8.11344e-11	-0.0666282	0.092	0.163	1.38488e-06
FAM208B	8.37687e-11	-0.0804216	0.122	0.2	1.42985e-06
TRAPPC6A	8.5428e-11	-0.0511878	0.054	0.111	1.45817e-06
ODF2L	8.56724e-11	-0.0850833	0.12	0.198	1.46234e-06
PLCL2	9.04801e-11	-0.085351	0.225	0.323	1.5444e-06
HTATIP2	9.97224e-11	-0.0530796	0.058	0.116	1.70216e-06
SART3	1.03511e-10	-0.0739168	0.123	0.202	1.76683e-06
VPS26A	1.04332e-10	-0.0751258	0.124	0.203	1.78085e-06
CA5B	1.05525e-10	-0.0626503	0.076	0.141	1.8012e-06
HK1	1.0565e-10	-0.0799424	0.147	0.232	1.80334e-06
PARL	1.10035e-10	-0.0528176	0.053	0.109	1.87818e-06
NDUFS6	1.11022e-10	-0.0659997	0.088	0.157	1.89504e-06
CWC22	1.14315e-10	-0.0615112	0.073	0.137	1.95125e-06
LINC00861	1.16062e-10	0.0994002	0.164	0.084	1.98105e-06
MRPS7	1.1896e-10	-0.0524581	0.05	0.105	2.03052e-06
2020-03-07	1.19508e-10	-0.0894643	0.178	0.268	2.03989e-06
TTC19	1.24537e-10	-0.0637721	0.099	0.173	2.12572e-06
SELK	1.24892e-10	-0.0734455	0.132	0.213	2.13177e-06
TRIP11	1.29994e-10	-0.0990074	0.136	0.216	2.21886e-06
KLHL24	1.30184e-10	-0.0684378	0.083	0.15	2.22211e-06
CASP8AP2	1.32801e-10	-0.0926974	0.164	0.249	2.26679e-06
SCLT1	1.33845e-10	-0.0589653	0.059	0.117	2.2846e-06
SZRD1	1.34449e-10	-0.072647	0.148	0.233	2.29491e-06
ITGB1BP1	1.35026e-10	-0.0615229	0.099	0.172	2.30476e-06
RASA2	1.37004e-10	-0.0809834	0.201	0.295	2.33852e-06
GIGYF2	1.38088e-10	-0.0982385	0.14	0.221	2.35702e-06
CBFB	1.39946e-10	-0.0713413	0.126	0.206	2.38873e-06
TRAFD1	1.41862e-10	-0.056045	0.08	0.147	2.42144e-06
MRPL51	1.43436e-10	-0.0580207	0.071	0.134	2.4483e-06
PHACTR2	1.44666e-10	-0.0856458	0.116	0.192	2.4693e-06
NLRC5	1.45508e-10	-0.0893978	0.266	0.367	2.48367e-06
OXA1L	1.47827e-10	-0.062983	0.091	0.162	2.52326e-06
FBXO18	1.48252e-10	-0.054932	0.073	0.137	2.53052e-06
FOSL2	1.50203e-10	-0.0818116	0.134	0.214	2.56381e-06
YBX3	1.52187e-10	-0.0588798	0.069	0.132	2.59768e-06
CLK4	1.56506e-10	-0.0646769	0.068	0.129	2.67141e-06
MPHOSPH8	1.57156e-10	-0.103619	0.248	0.343	2.68249e-06
URI1	1.57293e-10	-0.0704694	0.166	0.257	2.68483e-06
PIH1D1	1.67227e-10	-0.0581393	0.059	0.117	2.85439e-06
HDAC1	1.6805e-10	-0.0839229	0.229	0.328	2.86844e-06
SUPV3L1	1.79551e-10	-0.0506091	0.048	0.101	3.06475e-06
RRN3	1.8099e-10	-0.054337	0.069	0.131	3.08931e-06
NAA35	1.81197e-10	-0.055532	0.049	0.103	3.09284e-06
FNBP4	1.82026e-10	-0.0809628	0.239	0.341	3.10701e-06
CHD4	1.90898e-10	-0.107788	0.427	0.541	3.25844e-06
AIP	1.9147e-10	-0.0617517	0.111	0.188	3.26819e-06
CBLB	2.00409e-10	-0.0721426	0.136	0.218	3.42078e-06
PITHD1	2.01611e-10	-0.0556088	0.076	0.141	3.44129e-06
TYW3	2.04055e-10	-0.0595554	0.057	0.113	3.48302e-06
ISG15	2.05236e-10	0.116136	0.198	0.114	3.50318e-06
HYOU1	2.06825e-10	-0.0812299	0.13	0.209	3.5303e-06
PLK1S1	2.1395e-10	-0.0496808	0.049	0.102	3.65191e-06
OAS3	2.14287e-10	0.117753	0.173	0.093	3.65767e-06
CCL4	2.208e-10	-0.16104	0.131	0.206	3.76883e-06
TXNRD1	2.25932e-10	-0.0656202	0.088	0.156	3.85643e-06
SPG11	2.26484e-10	0.126484	0.261	0.169	3.86586e-06
COQ10B	2.28658e-10	-0.0520277	0.071	0.134	3.90296e-06
ARL8B	2.3083e-10	-0.0644719	0.104	0.177	3.94004e-06
C19orf60	2.33069e-10	-0.0643749	0.121	0.199	3.97826e-06
SLK	2.38485e-10	-0.0971125	0.245	0.338	4.0707e-06
PARP1	2.53205e-10	-0.089479	0.267	0.367	4.32195e-06
SENP7	2.6259e-10	-0.0699192	0.108	0.182	4.48215e-06
RNF139	2.73129e-10	-0.0635866	0.089	0.157	4.66204e-06
SKP1	2.79396e-10	-0.0846376	0.22	0.314	4.76902e-06
PDCD7	2.84445e-10	-0.0655296	0.079	0.144	4.85519e-06
SCYL1	3.14319e-10	-0.0487217	0.05	0.103	5.36511e-06
BRD8	3.15094e-10	-0.0691805	0.072	0.133	5.37833e-06
HARS	3.16223e-10	-0.0664949	0.091	0.16	5.39762e-06
ZFR	3.17949e-10	-0.0768778	0.179	0.269	5.42708e-06
WSB1	3.27966e-10	-0.0640234	0.132	0.212	5.59804e-06
B4GALT1	3.28695e-10	-0.0852772	0.177	0.264	5.6105e-06
GSDMD	3.30066e-10	-0.0718378	0.146	0.229	5.63389e-06
SIPA1	3.36156e-10	-0.0662201	0.135	0.215	5.73785e-06
FAM111A	3.37851e-10	-0.0947822	0.206	0.296	5.76679e-06
UBR3	3.5319e-10	-0.0644015	0.074	0.137	6.0286e-06
UGCG	3.66255e-10	-0.0579111	0.079	0.144	6.25161e-06
TRAT1	3.72662e-10	-0.0675841	0.095	0.165	6.36097e-06
UBL5	3.94165e-10	-0.0795105	0.212	0.306	6.728e-06
EIF3J	4.00426e-10	-0.0692535	0.101	0.172	6.83487e-06
NDUFA12	4.05366e-10	-0.0668962	0.109	0.183	6.9192e-06
KDM5B	4.21801e-10	-0.0524381	0.052	0.106	7.19973e-06
FGD3	4.22102e-10	-0.0717995	0.197	0.29	7.20487e-06
ACBD6	4.22804e-10	-0.0505154	0.049	0.102	7.21685e-06
KIF21A	4.24376e-10	-0.077755	0.116	0.19	7.24367e-06
MIB1	4.40028e-10	-0.0808813	0.101	0.171	7.51083e-06
ATG3	4.40918e-10	-0.0561474	0.096	0.167	7.52604e-06
SAP30BP	4.51932e-10	-0.0741979	0.127	0.204	7.71403e-06
TSPAN17	4.59686e-10	-0.0535837	0.061	0.118	7.84638e-06
NDNL2	4.60808e-10	-0.0577175	0.08	0.145	7.86554e-06
ATG16L1	4.65674e-10	-0.0627359	0.085	0.151	7.94859e-06
UBR2	4.67996e-10	-0.0878216	0.182	0.268	7.98823e-06
MFSD1	4.72495e-10	-0.0548067	0.059	0.116	8.06501e-06
OFD1	4.75262e-10	-0.086961	0.184	0.273	8.11225e-06
RARS	4.77501e-10	-0.0645038	0.068	0.127	8.15046e-06
TMEM43	4.78404e-10	-0.0657435	0.125	0.202	8.16589e-06
PMS1	5.18236e-10	-0.0503514	0.058	0.114	8.84577e-06
ACTR3	5.21572e-10	-0.0918724	0.467	0.587	8.90271e-06
EMG1	5.21585e-10	-0.049187	0.05	0.103	8.90293e-06
GPX1	5.25575e-10	-0.056813	0.067	0.127	8.97104e-06
PFKP	5.26568e-10	-0.0831992	0.153	0.235	8.98799e-06
SLC9A3R1	5.3526e-10	0.125689	0.375	0.276	9.13636e-06
CSGALNACT2	5.37675e-10	-0.0702457	0.111	0.185	9.17757e-06
KLF10	5.38611e-10	-0.0662894	0.092	0.16	9.19355e-06
CHST11	5.43487e-10	-0.0623742	0.105	0.178	9.27677e-06
RBBP7	5.64099e-10	-0.0857048	0.185	0.272	9.6286e-06
ACBD3	5.67997e-10	-0.0703457	0.098	0.167	9.69514e-06
UTRN	5.86367e-10	-0.144595	0.587	0.689	1.00087e-05
PPP3R1	5.8928e-10	-0.0515148	0.061	0.118	1.00584e-05
CNOT2	5.92275e-10	-0.0755163	0.146	0.226	1.01095e-05
RHOC	6.08941e-10	-0.053008	0.074	0.137	1.0394e-05
CAMK4	6.30343e-10	-0.0598029	0.098	0.169	1.07593e-05
C11orf30	6.39337e-10	-0.0489882	0.068	0.128	1.09128e-05
GOLGA8B	6.56407e-10	0.10791	0.233	0.146	1.12042e-05
DDX1	6.76223e-10	-0.0749253	0.12	0.193	1.15424e-05
SIRT1	6.77909e-10	-0.0703798	0.094	0.162	1.15712e-05
INO80	6.83614e-10	-0.0650333	0.106	0.178	1.16686e-05
MAGOH	6.99968e-10	-0.0482	0.053	0.106	1.19477e-05
CYTH1	7.01459e-10	-0.0969556	0.51	0.618	1.19732e-05
ZCCHC11	7.10374e-10	-0.0780756	0.162	0.246	1.21254e-05
CDYL	7.1115e-10	-0.0645385	0.086	0.151	1.21386e-05
OCIAD2	7.33086e-10	-0.0545539	0.079	0.143	1.2513e-05
ARIH1	7.34186e-10	-0.0646036	0.121	0.196	1.25318e-05
INPPL1	7.48602e-10	-0.0495887	0.058	0.114	1.27779e-05
OGT	7.53277e-10	0.125923	0.334	0.239	1.28577e-05
RHBDF2	7.77238e-10	-0.0482642	0.053	0.107	1.32667e-05
ADNP2	7.79123e-10	-0.0550447	0.056	0.11	1.32989e-05
MICU2	7.99138e-10	-0.058639	0.076	0.138	1.36405e-05
PCMTD1	8.05897e-10	-0.0697477	0.099	0.168	1.37559e-05
SOD2	8.05933e-10	-0.0674525	0.1	0.169	1.37565e-05
FAM192A	8.05949e-10	-0.06853	0.115	0.188	1.37567e-05
CHCHD2	8.32722e-10	-0.0683538	0.162	0.247	1.42137e-05
PLCG1	8.43074e-10	-0.0807063	0.143	0.222	1.43904e-05
HSD17B10	8.43526e-10	-0.0540946	0.068	0.128	1.43981e-05
PCMT1	8.99204e-10	-0.0667913	0.097	0.165	1.53485e-05
CDC42SE2	9.01129e-10	-0.0897716	0.476	0.596	1.53814e-05
NAA30	9.20173e-10	-0.0529611	0.064	0.121	1.57064e-05
LSM14A	9.39861e-10	-0.0792762	0.303	0.406	1.60425e-05
RUVBL1	9.75595e-10	-0.0552233	0.075	0.137	1.66524e-05
KANSL2	9.81326e-10	-0.0505093	0.057	0.111	1.67502e-05
DYNC1I2	9.96188e-10	-0.0596859	0.064	0.121	1.70039e-05
TAF3	1.01588e-09	-0.0645713	0.114	0.187	1.734e-05
TAOK3	1.0164e-09	-0.0928077	0.297	0.395	1.7349e-05
WHSC1L1	1.03079e-09	-0.100182	0.3	0.396	1.75946e-05
PCNA	1.05359e-09	-0.0492166	0.05	0.101	1.79837e-05
EVI2B	1.08579e-09	0.0855933	0.174	0.097	1.85334e-05
WTAP	1.086e-09	-0.068094	0.143	0.223	1.85369e-05
GRK6	1.11139e-09	-0.0710518	0.194	0.284	1.89704e-05
UBE2B	1.11586e-09	-0.0621414	0.108	0.18	1.90465e-05
EGLN2	1.13334e-09	-0.0495576	0.056	0.11	1.93449e-05
DHX29	1.1455e-09	-0.0660846	0.092	0.159	1.95526e-05
CD4	1.1688e-09	-0.0569452	0.083	0.148	1.99502e-05
TAF2	1.16889e-09	-0.0596455	0.071	0.131	1.99517e-05
PDZD8	1.21514e-09	-0.0700791	0.1	0.169	2.07413e-05
PABPC1	1.23487e-09	-0.0988395	0.778	0.893	2.1078e-05
IL2RG	1.26785e-09	0.127968	0.374	0.283	2.1641e-05
PRRC1	1.27188e-09	-0.0551221	0.073	0.134	2.17097e-05
SRPRB	1.2787e-09	-0.0518324	0.054	0.107	2.18262e-05
U2AF2	1.29951e-09	-0.0607765	0.091	0.157	2.21813e-05
CDK17	1.33207e-09	-0.067012	0.089	0.154	2.27371e-05
ANP32E	1.33289e-09	-0.0775036	0.237	0.332	2.27512e-05
RGS14	1.33625e-09	-0.055942	0.074	0.134	2.28085e-05
TNKS2	1.36317e-09	-0.0756333	0.206	0.297	2.3268e-05
PDHA1	1.37513e-09	-0.0568597	0.074	0.135	2.3472e-05
C1orf43	1.40553e-09	-0.0563299	0.077	0.139	2.3991e-05
YLPM1	1.44388e-09	-0.0723116	0.126	0.201	2.46456e-05
THOC1	1.47937e-09	-0.0501749	0.051	0.102	2.52514e-05
CAMLG	1.49481e-09	-0.069502	0.12	0.193	2.55149e-05
HAUS6	1.49803e-09	-0.0494681	0.065	0.123	2.55698e-05
DOCK11	1.50673e-09	-0.0951585	0.258	0.352	2.57184e-05
FBXO3	1.52429e-09	-0.0507549	0.054	0.107	2.6018e-05
CAP1	1.55178e-09	-0.0806804	0.648	0.788	2.64874e-05
PPHLN1	1.56984e-09	-0.0631225	0.135	0.213	2.67955e-05
ZMAT2	1.59238e-09	-0.0653013	0.148	0.228	2.71804e-05
CLCN3	1.60827e-09	-0.0553686	0.073	0.133	2.74516e-05
UBASH3A	1.63458e-09	-0.054445	0.09	0.156	2.79007e-05
KIAA0922	1.67887e-09	-0.0657128	0.122	0.195	2.86566e-05
BTBD6	1.76455e-09	-0.0534887	0.063	0.119	3.01192e-05
CAPN2	1.77722e-09	-0.0853269	0.483	0.598	3.03353e-05
PPM1B	1.80968e-09	-0.0632324	0.077	0.137	3.08894e-05
EMC4	1.82242e-09	-0.062146	0.121	0.195	3.11069e-05
EIF6	1.84436e-09	-0.0526275	0.056	0.109	3.14813e-05
PSAP	1.86289e-09	-0.0892915	0.456	0.573	3.17976e-05
OSBP	1.86866e-09	-0.0619612	0.085	0.148	3.18962e-05
GRIPAP1	1.88182e-09	-0.0622737	0.088	0.152	3.21208e-05
ECH1	2.03856e-09	-0.0658498	0.119	0.191	3.47962e-05
RBBP6	2.04861e-09	-0.0851163	0.274	0.372	3.49677e-05
CDC42	2.08523e-09	-0.0742906	0.411	0.526	3.55927e-05
HSPH1	2.09108e-09	-0.0759771	0.177	0.263	3.56926e-05
DDX18	2.14464e-09	-0.0755567	0.198	0.286	3.66069e-05
AATF	2.21335e-09	-0.0784716	0.145	0.222	3.77796e-05
TBL1XR1	2.26586e-09	-0.0639341	0.141	0.22	3.8676e-05
RAB5A	2.30085e-09	-0.0598849	0.101	0.169	3.92731e-05
TGS1	2.32399e-09	-0.0619002	0.089	0.154	3.96681e-05
SOAT1	2.35381e-09	-0.0610323	0.089	0.153	4.01772e-05
IFITM1	2.40425e-09	-0.0771093	0.145	0.222	4.10381e-05
RUNX3	2.43543e-09	-0.0988135	0.514	0.634	4.15703e-05
WDR70	2.45841e-09	-0.0513402	0.053	0.105	4.19626e-05
UBAP2	2.51043e-09	-0.0564272	0.081	0.143	4.28505e-05
SEC13	2.51724e-09	-0.0515107	0.076	0.136	4.29667e-05
HDLBP	2.5217e-09	-0.0708923	0.166	0.249	4.30429e-05
REL	2.57267e-09	-0.0752625	0.117	0.188	4.39128e-05
RBBP4	2.6409e-09	-0.0576981	0.096	0.163	4.50775e-05
C12orf23	2.74677e-09	-0.0459621	0.055	0.107	4.68846e-05
MORF4L2	2.80904e-09	-0.0560936	0.085	0.148	4.79475e-05
VPS54	2.89964e-09	-0.0493437	0.057	0.11	4.94939e-05
SKAP1	2.95123e-09	-0.0676684	0.202	0.292	5.03746e-05
EIF1AX	2.98194e-09	-0.0559938	0.078	0.138	5.08987e-05
WDR37	2.99951e-09	-0.0608933	0.082	0.144	5.11986e-05
NDUFV1	3.01097e-09	-0.0723557	0.128	0.2	5.13943e-05
CYC1	3.0577e-09	-0.0578434	0.097	0.163	5.21918e-05
BCL9L	3.10028e-09	-0.0572798	0.094	0.16	5.29187e-05
CCNT1	3.24294e-09	-0.0550598	0.09	0.154	5.53538e-05
SLA2	3.29021e-09	-0.0442948	0.051	0.101	5.61606e-05
DECR1	3.32624e-09	-0.0544175	0.082	0.144	5.67756e-05
RN7SL2	3.35052e-09	0.0722224	0.12	0.056	5.719e-05
RCOR3	3.3877e-09	-0.0537454	0.063	0.118	5.78247e-05
CHD9	3.39272e-09	-0.0868012	0.157	0.235	5.79104e-05
TCEB1	3.49307e-09	-0.0475009	0.059	0.112	5.96231e-05
RBM19	3.50654e-09	-0.0547861	0.071	0.129	5.98531e-05
AIFM1	3.56597e-09	-0.0489113	0.053	0.104	6.08676e-05
MDM2	3.59815e-09	-0.0636686	0.134	0.209	6.14168e-05
TRAF5	3.60722e-09	-0.0606379	0.087	0.15	6.15717e-05
EIF3L	3.64497e-09	-0.0659802	0.185	0.271	6.2216e-05
NEK1	3.7407e-09	-0.0585216	0.059	0.112	6.38499e-05
DDRGK1	3.74495e-09	-0.0519311	0.065	0.12	6.39226e-05
LBR	3.75474e-09	-0.08109	0.257	0.349	6.40897e-05
RNF157	3.88915e-09	-0.0471899	0.052	0.103	6.63839e-05
LRRFIP1	3.90589e-09	-0.112182	0.549	0.645	6.66697e-05
EAPP	4.02857e-09	-0.0583153	0.095	0.161	6.87636e-05
UBR1	4.03126e-09	-0.072754	0.118	0.188	6.88095e-05
MAP4K4	4.03664e-09	-0.072377	0.185	0.271	6.89015e-05
SMC3	4.0771e-09	-0.0793493	0.21	0.297	6.95919e-05
HMCES	4.09038e-09	-0.0562325	0.074	0.133	6.98187e-05
C9orf78	4.12782e-09	-0.0828229	0.282	0.377	7.04577e-05
CD63	4.17446e-09	-0.0877154	0.226	0.311	7.12538e-05
WRNIP1	4.24885e-09	-0.0569074	0.076	0.135	7.25237e-05
SSBP3	4.25628e-09	0.0959117	0.23	0.147	7.26504e-05
UBE3A	4.38989e-09	-0.0750751	0.176	0.258	7.49311e-05
RHOT2	4.40817e-09	-0.0588065	0.086	0.148	7.52431e-05
LTN1	4.46818e-09	-0.0712442	0.099	0.164	7.62673e-05
PTMA	4.52529e-09	0.134435	0.614	0.548	7.72423e-05
RIC8A	4.71859e-09	-0.0582783	0.09	0.153	8.05415e-05
ROCK2	4.72953e-09	-0.0726157	0.124	0.195	8.07283e-05
PIK3R5	4.77609e-09	-0.0651338	0.156	0.235	8.15231e-05
MRPS5	4.77727e-09	-0.0657716	0.102	0.169	8.15432e-05
PDS5B	4.81044e-09	-0.0620476	0.135	0.211	8.21094e-05
SNX2	4.86013e-09	-0.0549829	0.075	0.134	8.29576e-05
ARHGAP5	4.90437e-09	-0.0621508	0.09	0.153	8.37127e-05
COPS5	4.96158e-09	-0.0520246	0.064	0.119	8.46892e-05
HERC3	5.01308e-09	-0.0506619	0.055	0.106	8.55683e-05
CCDC82	5.12723e-09	-0.0641366	0.097	0.162	8.75167e-05
ERGIC1	5.16096e-09	-0.056473	0.064	0.119	8.80924e-05
ZNF259	5.33975e-09	-0.052213	0.072	0.129	9.11443e-05
SNRPA1	5.53306e-09	-0.0553184	0.077	0.136	9.44437e-05
CMAS	5.56804e-09	-0.0476814	0.055	0.106	9.50409e-05
OPTN	5.60446e-09	-0.0844688	0.319	0.42	9.56625e-05
CD96	5.68619e-09	-0.0893	0.302	0.396	9.70576e-05
COPB1	5.68716e-09	-0.0725144	0.165	0.244	9.70741e-05
FOXP1	5.90562e-09	-0.096678	0.276	0.367	0.000100803
CBX7	5.96411e-09	-0.048763	0.059	0.112	0.000101801
PFDN2	5.98194e-09	-0.0521553	0.06	0.113	0.000102106
TBCB	6.07755e-09	-0.0628023	0.138	0.212	0.000103738
STAG1	6.17484e-09	-0.0584035	0.093	0.157	0.000105398
PKN2	6.38478e-09	-0.0526031	0.07	0.127	0.000108982
SLFN12L	6.47635e-09	-0.0884601	0.189	0.27	0.000110545
GNL3	6.62052e-09	-0.0642708	0.099	0.164	0.000113006
BAZ1A	6.66816e-09	-0.0954448	0.247	0.336	0.000113819
CCDC47	6.71929e-09	-0.0526793	0.108	0.177	0.000114692
MED29	6.79039e-09	-0.0555227	0.084	0.145	0.000115905
PPFIA1	6.88227e-09	-0.0569436	0.097	0.162	0.000117474
PSTPIP1	6.96662e-09	-0.0707969	0.126	0.196	0.000118913
MED28	7.13072e-09	-0.0500499	0.055	0.105	0.000121714
LAMP1	7.14177e-09	-0.0717992	0.194	0.279	0.000121903
ALKBH5	7.16643e-09	-0.0601903	0.131	0.204	0.000122324
MDH2	7.22309e-09	-0.0557261	0.102	0.169	0.000123291
KANSL3	7.22517e-09	-0.0567139	0.08	0.14	0.000123326
ANXA7	7.23774e-09	-0.0570373	0.104	0.171	0.000123541
POLR2K	7.34298e-09	-0.0470578	0.054	0.104	0.000125337
CLINT1	7.36946e-09	-0.0716818	0.18	0.262	0.000125789
MAP2K2	7.40293e-09	-0.0542304	0.086	0.147	0.000126361
INSIG1	7.42713e-09	-0.0638329	0.093	0.156	0.000126774
KDM4A	7.54702e-09	-0.0520838	0.071	0.128	0.00012882
CCDC91	7.6334e-09	-0.0648692	0.109	0.177	0.000130295
PHPT1	7.83528e-09	-0.0509911	0.064	0.118	0.00013374
RWDD1	7.86276e-09	-0.0597473	0.104	0.17	0.00013421
ARPC4	8.04639e-09	-0.0713541	0.16	0.237	0.000137344
GLRX5	8.24997e-09	-0.047418	0.073	0.13	0.000140819
MAD1L1	8.31212e-09	-0.0573999	0.064	0.117	0.00014188
KIF2A	8.38132e-09	-0.068138	0.247	0.338	0.000143061
CENPC	8.79577e-09	-0.0596748	0.079	0.138	0.000150135
UQCRC2	8.8806e-09	-0.0622322	0.132	0.205	0.000151583
LRRFIP2	9.09942e-09	-0.0469868	0.058	0.109	0.000155318
SMARCC1	9.36618e-09	-0.0820746	0.278	0.372	0.000159871
SUV420H1	9.59197e-09	-0.0641546	0.136	0.209	0.000163725
ARIH2	9.83987e-09	-0.0773828	0.199	0.283	0.000167957
PPP2R2A	9.9105e-09	-0.0661156	0.095	0.158	0.000169162
PRDX5	9.94847e-09	-0.0632924	0.122	0.192	0.00016981
BAX	1.01883e-08	-0.0511423	0.064	0.118	0.000173904
BRD3	1.02998e-08	-0.061133	0.101	0.166	0.000175808
CYFIP2	1.03771e-08	0.148477	0.574	0.508	0.000177126
NEK9	1.08358e-08	-0.0580854	0.116	0.186	0.000184956
IGHM	1.08624e-08	0.169117	0.154	0.084	0.000185411
PITPNC1	1.09027e-08	-0.069602	0.16	0.237	0.000186098
GTF3C6	1.09049e-08	-0.0524546	0.073	0.129	0.000186136
PPP4R2	1.09592e-08	-0.057861	0.116	0.185	0.000187063
SSR3	1.12824e-08	-0.066505	0.134	0.205	0.00019258
TTC39C	1.14161e-08	-0.0659255	0.132	0.204	0.000194862
ZC3HAV1	1.16819e-08	-0.0797254	0.392	0.497	0.000199398
UBC	1.19065e-08	0.124123	0.787	0.764	0.000203232
TANK	1.19331e-08	-0.0609967	0.105	0.171	0.000203687
UBA52	1.21018e-08	0.155284	0.579	0.534	0.000206565
TMEM123	1.22557e-08	-0.0855352	0.417	0.523	0.000209193
KRI1	1.23518e-08	-0.0705026	0.162	0.24	0.000210833
USO1	1.30363e-08	-0.0697152	0.137	0.209	0.000222516
ADARB1	1.37478e-08	-0.0514089	0.065	0.118	0.000234662
UPP1	1.38361e-08	-0.0673456	0.151	0.226	0.000236168
KMT2E	1.4697e-08	-0.0806596	0.461	0.582	0.000250864
UBE4A	1.48515e-08	-0.0605866	0.1	0.164	0.000253499
MYO1G	1.49929e-08	-0.0830238	0.285	0.375	0.000255913
INTS8	1.51236e-08	-0.0555634	0.077	0.134	0.000258145
KHDRBS1	1.52754e-08	-0.0777944	0.264	0.353	0.000260736
CCT6A	1.53223e-08	-0.068712	0.197	0.28	0.000261536
UTP23	1.5409e-08	-0.0570515	0.071	0.126	0.000263017
MRPS21	1.55615e-08	-0.0556292	0.098	0.162	0.000265619
CDC123	1.56261e-08	-0.0514068	0.083	0.142	0.000266722
ATAD2B	1.56441e-08	-0.06089	0.071	0.126	0.000267029
ELP3	1.59361e-08	-0.0567127	0.087	0.147	0.000272013
SECISBP2	1.59733e-08	-0.0637115	0.143	0.217	0.000272648
CRELD2	1.62129e-08	-0.0627675	0.101	0.164	0.000276738
USP12	1.6352e-08	-0.0463639	0.058	0.109	0.000279112
EML3	1.69185e-08	-0.0486443	0.064	0.117	0.000288782
GABARAPL2	1.69489e-08	-0.0497995	0.082	0.141	0.000289301
YTHDF3	1.69998e-08	-0.051639	0.098	0.162	0.00029017
TTC13	1.73302e-08	-0.0581889	0.082	0.141	0.000295808
OSBPL8	1.73485e-08	-0.0864913	0.343	0.437	0.000296122
ZFP36L1	1.7567e-08	-0.0934657	0.198	0.275	0.000299852
CCAR2	1.76701e-08	-0.0501357	0.066	0.119	0.00030161
BRAP	1.76898e-08	-0.0501041	0.068	0.122	0.000301948
CD3D	1.78003e-08	-0.076836	0.574	0.7	0.000303833
OXCT1	1.79523e-08	-0.0560428	0.075	0.131	0.000306428
MAP3K3	1.80994e-08	-0.0593636	0.104	0.169	0.000308938
SMAD3	1.81157e-08	-0.070134	0.12	0.188	0.000309217
SUGP2	1.81701e-08	-0.0671681	0.135	0.206	0.000310146
WDR36	1.89727e-08	-0.0475259	0.056	0.105	0.000323845
RING1	1.9179e-08	-0.0469013	0.054	0.102	0.000327366
C5orf56	1.94281e-08	-0.0534755	0.086	0.146	0.000331619
ZC3H7B	1.95379e-08	-0.048274	0.059	0.109	0.000333492
AGPAT6	2.00045e-08	-0.0565226	0.083	0.141	0.000341456
MAPK8IP3	2.00889e-08	-0.0456967	0.058	0.108	0.000342898
AEBP2	2.02443e-08	-0.0562043	0.117	0.185	0.000345549
HLA-DPB1	2.05234e-08	0.123121	0.41	0.32	0.000350313
STARD7	2.0557e-08	-0.0688972	0.178	0.257	0.000350887
KPNA3	2.12745e-08	-0.0645715	0.118	0.185	0.000363134
DDX39B	2.14919e-08	-0.0677094	0.183	0.263	0.000366845
TXNL4A	2.15205e-08	-0.0572144	0.118	0.187	0.000367333
H2AFY	2.18384e-08	-0.0782687	0.179	0.257	0.00037276
COX8A	2.19297e-08	-0.0544539	0.1	0.164	0.000374319
SMEK1	2.25965e-08	-0.0749341	0.315	0.411	0.0003857
KIAA1429	2.2868e-08	-0.0593884	0.122	0.19	0.000390335
SNF8	2.29271e-08	-0.0470056	0.067	0.12	0.000391343
TES	2.32725e-08	-0.0739949	0.315	0.41	0.000397239
L3MBTL2	2.33089e-08	-0.0444203	0.057	0.107	0.000397859
LAMTOR5	2.38935e-08	-0.0569931	0.099	0.162	0.000407838
GRPEL1	2.4243e-08	-0.0492818	0.057	0.106	0.000413804
SNRNP70	2.43028e-08	-0.0637447	0.219	0.305	0.000414824
MBD4	2.44983e-08	-0.0509301	0.081	0.139	0.000418161
ACADM	2.47207e-08	-0.0469823	0.068	0.122	0.000421958
LCK	2.47228e-08	-0.0721072	0.451	0.559	0.000421993
BABAM1	2.51562e-08	-0.0461399	0.057	0.106	0.000429392
TUBGCP2	2.53073e-08	-0.056335	0.096	0.158	0.00043197
ACSF3	2.54535e-08	-0.0409897	0.055	0.104	0.000434466
FMNL1	2.58184e-08	-0.0740054	0.207	0.29	0.000440695
ANKRD36C	2.6441e-08	-0.0696965	0.126	0.194	0.000451322
ZNF37A	2.66303e-08	-0.0569949	0.087	0.146	0.000454552
CARS	2.66747e-08	-0.0744491	0.116	0.181	0.00045531
PHF20	2.70232e-08	-0.0732931	0.182	0.262	0.000461259
DHX16	2.76941e-08	-0.043453	0.053	0.101	0.000472711
RBM10	2.77419e-08	-0.061249	0.115	0.182	0.000473526
CD81	2.80485e-08	-0.0711224	0.282	0.375	0.000478759
NUCB2	2.8416e-08	-0.0663368	0.146	0.219	0.000485033
LUC7L3	2.85867e-08	-0.100934	0.269	0.351	0.000487946
CEP135	2.88009e-08	-0.0530708	0.065	0.117	0.000491603
KLHDC4	2.91498e-08	-0.0494088	0.071	0.125	0.000497558
PREB	2.99361e-08	-0.0435976	0.058	0.107	0.00051098
EDEM3	3.1161e-08	-0.0598719	0.078	0.133	0.000531887
ZEB1	3.12248e-08	-0.0484007	0.058	0.108	0.000532976
NMT2	3.12535e-08	-0.0477091	0.066	0.118	0.000533465
RALY	3.13331e-08	-0.0636735	0.149	0.221	0.000534825
RNF115	3.13744e-08	-0.0582337	0.084	0.142	0.00053553
PAK2	3.16126e-08	-0.0703938	0.232	0.318	0.000539595
CDC73	3.25961e-08	-0.0624961	0.113	0.179	0.000556382
RAB11FIP4	3.32459e-08	-0.0575776	0.115	0.182	0.000567475
NDUFA6	3.32807e-08	-0.0544305	0.109	0.174	0.000568068
OSBPL2	3.3407e-08	-0.050939	0.076	0.132	0.000570225
PLEKHJ1	3.3475e-08	-0.0526876	0.093	0.154	0.000571385
C14orf2	3.3812e-08	-0.0463897	0.084	0.142	0.000577137
LAX1	3.503e-08	-0.0574482	0.105	0.169	0.000597927
ADSL	3.63803e-08	-0.0459207	0.062	0.113	0.000620976
CRNKL1	3.65594e-08	-0.0546565	0.081	0.138	0.000624033
ACBD5	3.70022e-08	-0.0592874	0.111	0.176	0.000631591
BAG1	3.70052e-08	-0.0517081	0.096	0.158	0.000631642
CHD1L	3.82151e-08	-0.0619458	0.083	0.139	0.000652293
PHAX	3.85908e-08	-0.0574706	0.088	0.147	0.000658707
HEATR1	3.87026e-08	-0.0636167	0.081	0.137	0.000660615
PDZD4	3.91488e-08	-0.0602051	0.122	0.188	0.000668231
RUFY1	3.9632e-08	-0.0522328	0.081	0.138	0.000676478
ZNF507	4.12212e-08	-0.0691468	0.108	0.171	0.000703605
COX7A2L	4.15875e-08	-0.0569967	0.093	0.153	0.000709858
GZMH	4.15968e-08	0.115537	0.647	0.564	0.000710015
SEC22C	4.33728e-08	-0.0550778	0.072	0.125	0.00074033
NCLN	4.3432e-08	-0.043453	0.054	0.102	0.000741341
SLU7	4.46725e-08	-0.0703215	0.182	0.26	0.000762515
FAM214A	4.50437e-08	-0.0510584	0.095	0.156	0.000768851
KAT6B	4.51801e-08	-0.0840901	0.154	0.224	0.000771179
GTF2A1	4.57784e-08	-0.0494706	0.079	0.135	0.000781391
MPHOSPH10	4.60667e-08	-0.0521977	0.095	0.156	0.000786313
RNF113A	4.65566e-08	-0.0504591	0.078	0.133	0.000794674
SP140	4.69591e-08	-0.0709211	0.175	0.251	0.000801544
LRRC8C	4.72665e-08	-0.0527463	0.082	0.138	0.000806793
LMAN1	4.81813e-08	-0.0553356	0.151	0.225	0.000822407
GPKOW	4.98621e-08	-0.0471595	0.066	0.117	0.000851096
EHMT1	5.12703e-08	-0.0643441	0.132	0.199	0.000875132
SERPINB9	5.14139e-08	-0.0622453	0.128	0.196	0.000877584
PIM1	5.1938e-08	-0.102521	0.271	0.351	0.00088653
RRP1B	5.21357e-08	-0.0645385	0.142	0.212	0.000889904
DNAJC7	5.28978e-08	-0.0599249	0.117	0.183	0.000902912
METTL23	5.32889e-08	-0.0486092	0.062	0.112	0.000909588
HIST1H1D	5.35193e-08	0.0935118	0.221	0.144	0.000913522
THUMPD3	5.38017e-08	-0.0469401	0.064	0.114	0.000918341
FAF2	5.44021e-08	-0.0516875	0.063	0.113	0.00092859
ZMYM2	5.50956e-08	-0.0667472	0.136	0.204	0.000940427
UFD1L	5.52344e-08	-0.0547312	0.096	0.156	0.000942796
ZNF622	5.54237e-08	-0.0586646	0.105	0.167	0.000946028
EIF5A	5.9551e-08	-0.0515578	0.114	0.179	0.00101648
CAPRIN2	5.97914e-08	-0.0493794	0.07	0.123	0.00102058
SEC14L1	5.98957e-08	-0.0475952	0.07	0.122	0.00102236
KIAA1731	6.005e-08	-0.0556424	0.054	0.101	0.00102499
GIGYF1	6.11104e-08	-0.0497097	0.081	0.137	0.00104309
CTSW	6.24205e-08	0.0886502	0.28	0.197	0.00106546
PTBP3	6.26468e-08	-0.071615	0.352	0.448	0.00106932
SEMA4D	6.28497e-08	-0.0722228	0.341	0.436	0.00107278
DENR	6.43007e-08	-0.0616254	0.135	0.203	0.00109755
TACC1	6.72349e-08	-0.0769527	0.309	0.399	0.00114763
EIF4H	6.73026e-08	-0.0529998	0.135	0.205	0.00114879
NUCB1	6.99998e-08	-0.0598844	0.118	0.183	0.00119483
STK11	7.09478e-08	-0.0439141	0.06	0.109	0.00121101
PA2G4	7.23783e-08	-0.0621596	0.129	0.196	0.00123543
SP100	7.25533e-08	-0.0756191	0.493	0.602	0.00123841
DDX42	7.36832e-08	-0.074192	0.211	0.29	0.0012577
CLNS1A	7.41287e-08	-0.0498604	0.078	0.132	0.0012653
GPRIN3	7.60239e-08	-0.0954622	0.287	0.368	0.00129765
LARS	7.63322e-08	-0.0788065	0.189	0.264	0.00130291
PPP2R5C	7.6577e-08	-0.0767113	0.509	0.622	0.00130709
BNIP3L	7.87371e-08	-0.041799	0.059	0.107	0.00134396
UXS1	7.87991e-08	-0.0560405	0.074	0.127	0.00134502
POM121	7.89703e-08	0.0691483	0.145	0.081	0.00134794
DHX30	7.9706e-08	-0.0505176	0.078	0.133	0.0013605
U2SURP	8.03682e-08	-0.0769862	0.273	0.361	0.0013718
DEF6	8.09265e-08	-0.0630262	0.171	0.247	0.00138133
ZBTB11	8.16679e-08	-0.0586472	0.107	0.17	0.00139399
DHX15	8.28762e-08	-0.0545882	0.135	0.204	0.00141461
TRAK2	8.34342e-08	-0.0635905	0.12	0.184	0.00142414
PRKRIP1	8.34931e-08	-0.0593141	0.086	0.143	0.00142514
TNPO1	8.53858e-08	-0.0579923	0.117	0.182	0.00145745
DYNC1LI2	8.54887e-08	-0.0521604	0.088	0.145	0.00145921
TAOK1	8.62546e-08	-0.0775483	0.271	0.359	0.00147228
UNC13D	8.64307e-08	-0.0568443	0.127	0.193	0.00147529
DPP7	8.66357e-08	-0.0519861	0.114	0.179	0.00147878
ZEB2	8.79239e-08	-0.105134	0.33	0.414	0.00150077
ATXN7L3	9.21373e-08	-0.0546533	0.122	0.188	0.00157269
SUPT4H1	9.23715e-08	-0.0475704	0.076	0.13	0.00157669
RBM26	9.24533e-08	-0.065519	0.201	0.28	0.00157809
ZDHHC17	9.28301e-08	-0.0476977	0.075	0.128	0.00158452
PICALM	9.79088e-08	-0.069658	0.217	0.297	0.00167121
IFFO2	9.82083e-08	-0.0561016	0.102	0.162	0.00167632
OXSR1	9.9073e-08	-0.0543984	0.14	0.21	0.00169108
NAA16	1.00015e-07	-0.0475952	0.07	0.121	0.00170716
BIN1	1.01247e-07	-0.0644218	0.223	0.306	0.00172818
CHMP4B	1.01623e-07	-0.064014	0.18	0.255	0.00173461
ZNF407	1.02099e-07	-0.0453188	0.071	0.123	0.00174274
SMU1	1.03116e-07	-0.0589012	0.123	0.188	0.00176009
ANAPC4	1.04065e-07	-0.0484449	0.073	0.126	0.00177629
UFC1	1.05736e-07	-0.0662601	0.163	0.234	0.00180481
BZW1	1.14168e-07	0.0881246	0.234	0.159	0.00194873
AIMP1	1.14613e-07	-0.0502467	0.082	0.137	0.00195632
MOAP1	1.14844e-07	-0.0528581	0.112	0.175	0.00196028
STX6	1.16021e-07	-0.0442458	0.057	0.104	0.00198037
PPM1G	1.16138e-07	-0.0631727	0.186	0.263	0.00198235
CMTM6	1.18335e-07	-0.066575	0.158	0.229	0.00201985
ZC3H7A	1.18741e-07	-0.0691446	0.127	0.191	0.00202679
MSI2	1.20388e-07	-0.0549154	0.136	0.204	0.0020549
HSPA4	1.21876e-07	-0.0560058	0.164	0.238	0.0020803
RGS10	1.23384e-07	-0.0496799	0.078	0.132	0.00210605
IARS2	1.24764e-07	-0.0541882	0.103	0.163	0.00212959
MX1	1.25688e-07	0.11111	0.248	0.174	0.00214537
GBP4	1.2683e-07	-0.0917248	0.255	0.333	0.00216486
ELP2	1.29129e-07	-0.0500612	0.096	0.155	0.00220411
WIPF1	1.2974e-07	-0.0677375	0.454	0.559	0.00221454
SKIV2L2	1.30529e-07	-0.0480487	0.088	0.144	0.002228
WDR44	1.30679e-07	-0.0440009	0.057	0.104	0.00223055
ATG4B	1.30757e-07	-0.0444908	0.058	0.105	0.00223189
TBC1D1	1.31158e-07	-0.0546708	0.108	0.17	0.00223874
LAPTM4A	1.3178e-07	-0.047177	0.076	0.129	0.00224935
PHYKPL	1.33478e-07	-0.0506918	0.086	0.142	0.00227833
TMBIM1	1.35043e-07	-0.0455205	0.083	0.138	0.00230505
DERL2	1.39012e-07	-0.0460555	0.067	0.117	0.0023728
NDUFS1	1.39856e-07	-0.0470009	0.11	0.173	0.0023872
GTF2A2	1.41204e-07	-0.0438126	0.063	0.112	0.0024102
SENP6	1.42308e-07	-0.0792179	0.28	0.363	0.00242906
USP1	1.42735e-07	-0.0524381	0.173	0.249	0.00243634
DOCK10	1.4294e-07	-0.0766946	0.286	0.372	0.00243985
DDOST	1.46187e-07	-0.0572593	0.122	0.186	0.00249526
AFTPH	1.46258e-07	-0.0584924	0.162	0.234	0.00249647
TRAPPC3	1.46527e-07	-0.0419586	0.062	0.11	0.00250107
PTPN11	1.4889e-07	-0.0672848	0.215	0.294	0.0025414
TMPO	1.49775e-07	-0.0702521	0.198	0.274	0.00255651
FNIP1	1.50349e-07	-0.0421922	0.058	0.105	0.0025663
2020-09-06	1.5236e-07	-0.0676484	0.305	0.394	0.00260064
LILRB1	1.58355e-07	0.0790857	0.185	0.115	0.00270296
SMC5	1.63324e-07	-0.0612997	0.176	0.25	0.00278777
MATK	1.63606e-07	-0.0581691	0.15	0.219	0.00279259
STK25	1.6424e-07	-0.0443056	0.074	0.126	0.00280341
IDH3B	1.64961e-07	-0.0545539	0.079	0.132	0.00281572
CNN2	1.67767e-07	-0.076667	0.172	0.242	0.00286361
LEF1	1.68041e-07	-0.0550598	0.088	0.144	0.0028683
AKR1B1	1.70156e-07	-0.047659	0.074	0.126	0.00290439
RTFDC1	1.70552e-07	-0.0545632	0.106	0.166	0.00291115
JAK3	1.71117e-07	-0.0586458	0.188	0.264	0.00292079
TRAF3	1.72071e-07	-0.0506149	0.071	0.121	0.00293708
SLC25A28	1.75926e-07	-0.0510778	0.085	0.14	0.00300289
ALDOA	1.78555e-07	-0.0680228	0.282	0.366	0.00304776
NONO	1.79554e-07	-0.0663135	0.26	0.345	0.00306481
GLOD4	1.80193e-07	-0.0484962	0.092	0.149	0.00307571
RAB21	1.8606e-07	-0.0611533	0.115	0.177	0.00317586
CTCF	1.87598e-07	-0.0676292	0.215	0.294	0.00320211
VAPB	1.90823e-07	-0.042644	0.069	0.119	0.00325715
MKLN1	1.95282e-07	-0.0621041	0.103	0.162	0.00333326
ANKIB1	1.98337e-07	-0.0637576	0.157	0.226	0.00338541
RANBP9	2.07953e-07	-0.0490616	0.097	0.155	0.00354955
RNF169	2.10016e-07	-0.0602001	0.101	0.159	0.00358476
EIF3I	2.10912e-07	-0.0566623	0.119	0.182	0.00360005
BTN2A1	2.1287e-07	-0.0554931	0.135	0.201	0.00363348
STAT6	2.18774e-07	-0.0677761	0.226	0.306	0.00373425
PTDSS1	2.23012e-07	-0.0502467	0.084	0.138	0.00380659
AK2	2.26517e-07	-0.0475649	0.098	0.156	0.00386643
TXNL1	2.2718e-07	-0.0485151	0.084	0.138	0.00387773
RNF216	2.29592e-07	-0.0627053	0.177	0.25	0.0039189
POLR2E	2.30608e-07	-0.0406746	0.057	0.102	0.00393624
TARSL2	2.31091e-07	-0.0490988	0.057	0.102	0.00394449
PCF11	2.31943e-07	-0.0719853	0.223	0.302	0.00395903
CTSA	2.33072e-07	-0.0431076	0.058	0.104	0.00397831
HLTF	2.33399e-07	-0.0410738	0.056	0.101	0.00398389
AFF4	2.35059e-07	-0.0602091	0.198	0.276	0.00401222
ADPGK	2.35396e-07	-0.0512482	0.09	0.145	0.00401798
ZNF148	2.37548e-07	-0.0815256	0.207	0.279	0.00405471
AKNA	2.40533e-07	-0.0651828	0.446	0.543	0.00410565
UBR5	2.44605e-07	-0.0649426	0.216	0.295	0.00417516
PRPF3	2.46574e-07	-0.057301	0.119	0.181	0.00420878
CSNK2A2	2.47261e-07	-0.0574853	0.118	0.181	0.0042205
OGFR	2.47444e-07	-0.0459062	0.074	0.125	0.00422361
PNPT1	2.49261e-07	-0.0421922	0.062	0.11	0.00425463
TMEM57	2.52082e-07	-0.0444407	0.066	0.114	0.00430279
CHMP3	2.59174e-07	-0.0472007	0.07	0.119	0.00442385
2020-09-15	2.62852e-07	-0.0633592	0.198	0.274	0.00448661
PQBP1	2.64453e-07	-0.048472	0.073	0.124	0.00451395
AKT3	2.67377e-07	-0.053631	0.102	0.161	0.00456386
RCAN3	2.7201e-07	-0.0508313	0.061	0.108	0.00464295
TRAC	2.74229e-07	-0.0666684	0.459	0.569	0.00468082
SMC6	2.75484e-07	-0.0512265	0.093	0.15	0.00470224
SHKBP1	2.79345e-07	-0.0531845	0.089	0.143	0.00476813
SPON2	2.82382e-07	0.0974606	0.218	0.147	0.00481998
PHF1	2.8385e-07	-0.0556252	0.095	0.151	0.00484504
EIF2S3	2.84849e-07	-0.059664	0.165	0.235	0.00486209
ZFP91	2.97115e-07	-0.0561579	0.118	0.18	0.00507146
CUL2	3.00328e-07	-0.045196	0.08	0.133	0.00512629
XRN2	3.01191e-07	-0.0563646	0.214	0.293	0.00514103
IREB2	3.05e-07	-0.0522352	0.115	0.176	0.00520605
DNAJC13	3.12441e-07	-0.0724047	0.164	0.232	0.00533305
PRDX6	3.22155e-07	-0.0547467	0.106	0.165	0.00549886
FRYL	3.2297e-07	-0.0768844	0.259	0.339	0.00551278
SNRPF	3.28896e-07	-0.040829	0.061	0.107	0.00561392
GNL2	3.35373e-07	-0.0405779	0.06	0.106	0.00572448
GOPC	3.35445e-07	-0.0590882	0.102	0.16	0.00572571
GOLGA2	3.4042e-07	-0.0534887	0.088	0.142	0.00581062
PSMC3	3.45272e-07	-0.0569861	0.114	0.174	0.00589345
WBP11	3.4794e-07	-0.0572806	0.151	0.218	0.00593898
SSH1	3.49971e-07	-0.0623889	0.144	0.21	0.00597366
PEX1	3.78301e-07	-0.0450106	0.072	0.122	0.00645723
POLR3GL	3.78723e-07	-0.0565704	0.157	0.226	0.00646443
AARS	3.81138e-07	-0.0476977	0.075	0.125	0.00650565
HDAC7	3.9513e-07	-0.0412857	0.065	0.113	0.00674447
SAMD8	3.9647e-07	-0.0447011	0.06	0.105	0.00676735
TMEM160	3.97841e-07	-0.0484086	0.091	0.146	0.00679075
CCNL2	3.98789e-07	-0.0640779	0.234	0.312	0.00680693
EIF2S1	4.12355e-07	-0.0468799	0.103	0.161	0.00703848
ACP1	4.14557e-07	-0.0498519	0.117	0.178	0.00707607
ZCCHC7	4.14837e-07	-0.0486858	0.073	0.122	0.00708085
EIF3H	4.16722e-07	-0.0706233	0.289	0.371	0.00711303
EIF3D	4.31942e-07	-0.0577574	0.219	0.298	0.00737282
STAT5A	4.33702e-07	-0.053641	0.121	0.183	0.00740286
PAN3	4.35428e-07	-0.05261	0.107	0.165	0.00743232
MAP3K1	4.4195e-07	-0.048805	0.097	0.153	0.00754364
TNRC6C	4.48849e-07	-0.0640482	0.173	0.242	0.0076614
ANKFY1	4.50591e-07	-0.0504797	0.086	0.139	0.00769113
TAF10	4.53226e-07	-0.0488592	0.102	0.16	0.00773612
SFI1	4.55782e-07	-0.0595226	0.123	0.185	0.00777975
PUM2	4.56217e-07	-0.0579076	0.279	0.365	0.00778717
STK39	4.57246e-07	-0.0494455	0.102	0.16	0.00780472
GNL1	4.64881e-07	-0.0487264	0.084	0.137	0.00793505
MAPKAPK2	4.73374e-07	-0.060966	0.205	0.28	0.00808002
IL17RA	4.79878e-07	-0.0529477	0.108	0.167	0.00819104
DSTYK	4.80902e-07	-0.0458123	0.059	0.104	0.00820851
SCFD1	4.93445e-07	-0.0484882	0.083	0.135	0.00842261
TBCC	5.06074e-07	-0.0431864	0.075	0.125	0.00863818
DDX55	5.13737e-07	-0.0456568	0.063	0.109	0.00876898
EVI2A	5.14529e-07	-0.0442679	0.07	0.118	0.0087825
TRIM25	5.17864e-07	-0.043708	0.092	0.147	0.00883943
DYRK1A	5.24477e-07	-0.0704606	0.189	0.259	0.0089523
LMO4	5.30905e-07	-0.0606728	0.082	0.132	0.00906202
PLEC	5.32892e-07	-0.0766715	0.187	0.256	0.00909594
UBE2J1	5.40622e-07	-0.0537266	0.136	0.2	0.00922788
S100A10	5.54546e-07	-0.0741666	0.245	0.321	0.00946555
XIAP	5.81526e-07	-0.0634848	0.162	0.231	0.00992607
PSMD12	5.83532e-07	-0.0437534	0.071	0.12	0.00996031
SNHG14	5.86926e-07	-0.0422029	0.06	0.105	0.0100182
CD320	5.90972e-07	-0.0437627	0.092	0.147	0.0100873
DCAF5	5.91254e-07	-0.0685057	0.279	0.361	0.0100921
IMP3	6.06748e-07	-0.044516	0.09	0.144	0.0103566
SMDT1	6.09859e-07	-0.0517286	0.099	0.155	0.0104097
IFIT3	6.16834e-07	0.0850149	0.145	0.085	0.0105287
MLKL	6.18323e-07	-0.0529693	0.077	0.127	0.0105542
MXD4	6.26167e-07	-0.0594234	0.147	0.211	0.010688
PSME4	6.28535e-07	-0.0697233	0.155	0.22	0.0107285
WDR26	6.36067e-07	-0.0632658	0.235	0.312	0.010857
ELMSAN1	6.37784e-07	-0.0577284	0.109	0.167	0.0108863
NDUFA10	6.4179e-07	-0.0507025	0.103	0.159	0.0109547
RCBTB2	6.43544e-07	-0.0452575	0.062	0.108	0.0109847
PDLIM2	6.55754e-07	-0.0413104	0.062	0.108	0.0111931
EBNA1BP2	6.56552e-07	-0.046498	0.069	0.116	0.0112067
LRMP	6.68202e-07	-0.0444317	0.087	0.14	0.0114055
USP9X	6.81432e-07	-0.0735991	0.241	0.316	0.0116314
RSBN1	6.8534e-07	-0.0620615	0.15	0.215	0.0116981
DGKD	6.8624e-07	-0.0658375	0.183	0.253	0.0117134
SMARCA2	6.87167e-07	-0.0710967	0.334	0.422	0.0117292
TTC3	6.88474e-07	-0.0776238	0.327	0.41	0.0117516
STRAP	6.90939e-07	-0.0501224	0.094	0.148	0.0117936
SRSF1	7.00916e-07	-0.0459984	0.082	0.133	0.0119639
IL10RB	7.01895e-07	-0.0425324	0.06	0.104	0.0119806
RANBP2	7.11945e-07	-0.0669366	0.283	0.365	0.0121522
CDK5RAP3	7.13612e-07	-0.0597902	0.128	0.189	0.0121806
BLMH	7.19999e-07	-0.0459676	0.064	0.109	0.0122897
DDHD2	7.20144e-07	-0.0477245	0.087	0.14	0.0122921
CTSS	7.39002e-07	-0.0795998	0.316	0.399	0.012614
RER1	7.48191e-07	-0.0448033	0.094	0.149	0.0127709
DNM1L	7.58968e-07	-0.0480851	0.092	0.146	0.0129548
BRD9	7.64388e-07	-0.0466729	0.076	0.125	0.0130473
SACM1L	7.81509e-07	-0.051639	0.103	0.159	0.0133396
IKBKAP	7.85643e-07	-0.04652	0.073	0.121	0.0134101
ZC3H14	7.86446e-07	-0.0437534	0.072	0.12	0.0134239
USF2	7.86866e-07	-0.0681844	0.162	0.226	0.013431
FAM53B	7.99008e-07	-0.0639719	0.204	0.275	0.0136383
CCDC12	8.36499e-07	-0.0520398	0.115	0.174	0.0142782
DLG1	8.45988e-07	-0.0494483	0.111	0.17	0.0144402
UBXN6	8.6286e-07	-0.0364275	0.06	0.105	0.0147282
GANAB	8.65197e-07	-0.038625	0.068	0.115	0.014768
WDR82	8.73476e-07	-0.0611532	0.369	0.46	0.0149094
TPI1	8.88369e-07	-0.0571629	0.201	0.274	0.0151636
JARID2	8.91824e-07	-0.0565704	0.11	0.167	0.0152226
PSMC4	9.09538e-07	-0.0449928	0.082	0.132	0.0155249
TDRD3	9.14737e-07	-0.0382212	0.061	0.106	0.0156136
ZZZ3	9.25135e-07	-0.046845	0.082	0.132	0.0157911
CCDC69	9.34403e-07	-0.0706007	0.337	0.422	0.0159493
PHF10	9.39384e-07	-0.0440577	0.088	0.14	0.0160343
CLIP4	9.63754e-07	-0.0438942	0.074	0.123	0.0164503
MFNG	9.68007e-07	-0.0479478	0.102	0.157	0.0165229
C17orf85	9.79724e-07	-0.0484596	0.107	0.164	0.0167229
SERBP1	9.93131e-07	-0.0639425	0.333	0.42	0.0169517
SERINC3	1.02761e-06	-0.0665391	0.217	0.289	0.0175403
WDR45B	1.02829e-06	-0.0413947	0.06	0.104	0.0175519
C19orf10	1.06036e-06	-0.0495895	0.073	0.121	0.0180992
FTL	1.06461e-06	0.109415	0.432	0.36	0.0181718
USMG5	1.07289e-06	-0.0495089	0.14	0.203	0.0183132
SERF2	1.08107e-06	-0.0569596	0.476	0.583	0.0184528
CD53	1.10359e-06	-0.0578111	0.468	0.573	0.0188371
ST13	1.11489e-06	-0.0457544	0.105	0.162	0.01903
UBA6	1.13062e-06	-0.0480705	0.1	0.155	0.0192985
IMPAD1	1.14197e-06	-0.0463071	0.096	0.15	0.0194923
PDCD6	1.1439e-06	-0.0477996	0.1	0.155	0.0195252
PMPCB	1.183e-06	-0.0451904	0.097	0.151	0.0201927
TIMMDC1	1.19284e-06	-0.0420537	0.06	0.103	0.0203607
TEP1	1.19324e-06	-0.0420563	0.072	0.119	0.0203674
FAM134C	1.21128e-06	-0.0532759	0.14	0.202	0.0206754
GYG1	1.26062e-06	-0.0408914	0.066	0.112	0.0215176
TRIM37	1.26938e-06	-0.0436404	0.061	0.105	0.0216671
RASSF5	1.28423e-06	0.129729	0.477	0.42	0.0219206
NMRK1	1.31523e-06	-0.0398372	0.067	0.113	0.0224497
VPS4B	1.34304e-06	-0.0550583	0.175	0.243	0.0229244
RNF38	1.36673e-06	-0.0486455	0.117	0.176	0.0233287
TSC22D2	1.36992e-06	-0.0382212	0.06	0.103	0.0233832
TSNAX	1.37959e-06	-0.0364227	0.059	0.102	0.0235482
CIB1	1.39079e-06	-0.0545196	0.191	0.262	0.0237393
GIMAP8	1.39376e-06	-0.0604806	0.109	0.164	0.0237901
SUCO	1.39975e-06	-0.0546787	0.112	0.169	0.0238923
POLDIP3	1.40659e-06	-0.0479001	0.076	0.123	0.0240092
USP42	1.43581e-06	-0.0388708	0.061	0.105	0.0245079
C11orf48	1.43761e-06	-0.0447702	0.077	0.125	0.0245386
TCF7	1.44687e-06	-0.0491141	0.189	0.263	0.0246965
KIAA1147	1.47617e-06	-0.0503444	0.104	0.159	0.0251968
EAF1	1.50504e-06	-0.0402399	0.064	0.109	0.0256896
PCYT1A	1.55152e-06	-0.0572536	0.122	0.18	0.0264829
UBAP1	1.5776e-06	-0.0418936	0.059	0.101	0.026928
TCEB3	1.58169e-06	-0.0458841	0.099	0.153	0.0269978
CLPP	1.5998e-06	-0.0387101	0.061	0.105	0.027307
GZMB	1.61168e-06	0.131763	0.498	0.429	0.0275098
WDFY1	1.64342e-06	-0.0501098	0.111	0.168	0.0280515
MED13	1.72815e-06	-0.0715119	0.241	0.313	0.0294978
PIK3C2A	1.76131e-06	-0.0328265	0.066	0.111	0.0300638
CNST	1.77386e-06	-0.0377378	0.068	0.114	0.030278
CXXC1	1.77682e-06	-0.0502738	0.089	0.139	0.0303285
HSD17B4	1.78427e-06	-0.0448224	0.068	0.113	0.0304558
PSMB7	1.79635e-06	-0.0436387	0.093	0.145	0.0306618
POLR2A	1.80375e-06	-0.0461134	0.097	0.15	0.0307882
ARHGEF2	1.82117e-06	-0.0439342	0.082	0.131	0.0310856
TCERG1	1.82307e-06	-0.0506437	0.126	0.185	0.031118
TRIM33	1.84786e-06	-0.0534654	0.193	0.264	0.0315411
ANKRD17	1.85081e-06	-0.0561137	0.198	0.269	0.0315914
SDHA	1.87734e-06	-0.057301	0.127	0.185	0.0320443
SBK1	1.90671e-06	0.0603248	0.138	0.082	0.0325456
NDUFA2	1.91209e-06	-0.0414021	0.083	0.133	0.0326375
FERMT3	1.9484e-06	-0.059472	0.199	0.269	0.0332573
MINK1	1.99854e-06	-0.0362785	0.066	0.111	0.0341131
STX10	2.0138e-06	-0.0408081	0.067	0.112	0.0343735
DIAPH2	2.03296e-06	-0.03814	0.06	0.103	0.0347006
CUL1	2.03495e-06	-0.0560788	0.148	0.209	0.0347346
MLXIP	2.04799e-06	-0.0425596	0.07	0.115	0.0349572
SYTL2	2.07162e-06	-0.0764923	0.21	0.277	0.0353606
LTA4H	2.0904e-06	-0.0448224	0.07	0.115	0.035681
GRB2	2.09739e-06	-0.0637146	0.333	0.42	0.0358004
XRCC5	2.10427e-06	-0.0586542	0.416	0.508	0.0359178
LSM14B	2.13232e-06	-0.0383844	0.059	0.101	0.0363966
MAPKAPK3	2.13364e-06	-0.0414617	0.064	0.108	0.0364191
TCHP	2.15084e-06	-0.0477112	0.082	0.13	0.0367127
TOMM7	2.15339e-06	-0.0610786	0.257	0.333	0.0367561
USP4	2.17321e-06	-0.0537001	0.14	0.2	0.0370946
THEMIS2	2.20352e-06	-0.0385405	0.077	0.125	0.0376119
SDHB	2.23747e-06	-0.040142	0.078	0.126	0.0381914
IL4R	2.24112e-06	-0.0448351	0.108	0.164	0.0382537
TSTD1	2.25054e-06	-0.0400069	0.064	0.108	0.0384144
STIM2	2.27194e-06	-0.0626255	0.187	0.253	0.0387797
SNX14	2.32228e-06	-0.049975	0.093	0.144	0.0396389
MYO9A	2.37146e-06	-0.0608598	0.132	0.19	0.0404784
RC3H1	2.38041e-06	-0.0559271	0.171	0.236	0.0406313
FUNDC2	2.44746e-06	-0.0406355	0.071	0.117	0.0417756
DDX50	2.46042e-06	-0.0577284	0.111	0.165	0.041997
PAPOLG	2.47996e-06	-0.0398244	0.07	0.115	0.0423304
ZMIZ2	2.50194e-06	-0.0404171	0.063	0.106	0.0427057
C14orf166	2.50884e-06	-0.04007	0.074	0.12	0.0428233
AGO1	2.5156e-06	-0.047455	0.095	0.147	0.0429388
JAKMIP1	2.57108e-06	-0.0454549	0.097	0.149	0.0438857
SND1	2.69236e-06	-0.0595105	0.132	0.189	0.045956
ANKRD44	2.70576e-06	-0.059051	0.196	0.263	0.0461845
ZNF131	2.72946e-06	-0.0464359	0.11	0.165	0.0465892
KIDINS220	2.78135e-06	-0.0730802	0.239	0.31	0.0474749
PRNP	2.7994e-06	-0.0603944	0.187	0.254	0.047783
PI4KB	2.80754e-06	-0.0371637	0.061	0.104	0.0479219
GCN1L1	2.84019e-06	-0.0521264	0.105	0.158	0.0484792
CAPNS1	2.8558e-06	-0.0571076	0.276	0.355	0.0487457
TTC1	2.88823e-06	-0.0522542	0.139	0.198	0.0492991
PGPEP1	2.92813e-06	-0.0438458	0.092	0.143	0.0499803
CHMP1A	2.94505e-06	-0.0413104	0.064	0.107	0.0502691
OARD1	2.95513e-06	-0.0416209	0.063	0.106	0.0504412
KDM4C	2.97868e-06	-0.0453049	0.098	0.15	0.0508432
DIAPH1	2.99169e-06	0.126708	0.627	0.598	0.0510652
TLK1	3.0125e-06	-0.0461317	0.135	0.195	0.0514203
NGLY1	3.03944e-06	-0.0428962	0.082	0.13	0.0518802
AP1B1	3.05115e-06	-0.0396846	0.063	0.106	0.0520801
CRLF3	3.06394e-06	-0.0437343	0.103	0.157	0.0522984
SUCLG1	3.0787e-06	-0.049203	0.085	0.134	0.0525503
CEP250	3.09728e-06	-0.0403053	0.101	0.154	0.0528675
SNX13	3.10254e-06	-0.0452575	0.061	0.103	0.0529572
COX5A	3.12188e-06	-0.0448375	0.092	0.143	0.0532874
SLC3A2	3.14839e-06	-0.0468115	0.12	0.177	0.0537398
GALNT11	3.15392e-06	-0.038943	0.074	0.12	0.0538342
BCCIP	3.19314e-06	-0.0367716	0.069	0.114	0.0545036
GIT2	3.38911e-06	-0.0569017	0.096	0.146	0.0578487
PCNXL2	3.45081e-06	-0.0464327	0.072	0.117	0.0589019
INPP5K	3.47797e-06	-0.0402345	0.072	0.117	0.0593655
HSPA5	3.53463e-06	-0.0685481	0.619	0.71	0.0603326
C19orf12	3.57946e-06	-0.0450392	0.095	0.146	0.0610978
ARRB2	3.64443e-06	-0.0483266	0.194	0.263	0.0622067
LCP1	3.72189e-06	0.0924341	0.928	0.928	0.0635289
RAP1GDS1	3.73786e-06	-0.037032	0.083	0.131	0.0638015
UBE2D2	3.751e-06	-0.0494317	0.17	0.235	0.0640259
GLO1	3.75479e-06	-0.046935	0.125	0.183	0.0640906
ITGB2	3.75984e-06	-0.0736197	0.698	0.782	0.0641768
COX19	3.76861e-06	-0.0456928	0.079	0.125	0.0643264
GNPTAB	3.86015e-06	0.0975165	0.404	0.329	0.065889
PSMA5	3.88702e-06	-0.0462104	0.136	0.195	0.0663475
C1orf21	3.89594e-06	-0.0716024	0.175	0.236	0.0664999
SLC39A10	3.94751e-06	-0.046738	0.076	0.122	0.0673801
PTPLAD1	3.94878e-06	-0.0349018	0.066	0.11	0.0674018
ZBTB8OS	3.97837e-06	-0.0361093	0.063	0.105	0.0679068
DGKH	3.98619e-06	-0.0559888	0.061	0.102	0.0680403
GORASP2	4.08595e-06	-0.0397469	0.074	0.12	0.0697431
FTSJ3	4.20398e-06	-0.0434339	0.109	0.163	0.0717577
EEA1	4.20813e-06	-0.052342	0.095	0.145	0.0718286
MLLT3	4.29984e-06	-0.0482338	0.092	0.142	0.073394
CRTAM	4.33545e-06	-0.0423475	0.078	0.124	0.0740017
ANKLE2	4.34855e-06	-0.0646563	0.21	0.278	0.0742254
HNRNPF	4.40255e-06	-0.0642272	0.251	0.32	0.075147
GGA2	4.44032e-06	-0.0411801	0.121	0.178	0.0757918
DERL1	4.46859e-06	-0.0501037	0.13	0.188	0.0762743
PPP1R12C	4.53696e-06	-0.0483223	0.116	0.171	0.0774414
ABCA7	4.54036e-06	-0.0411038	0.075	0.12	0.0774993
NIPSNAP1	4.55997e-06	-0.0396768	0.067	0.11	0.0778341
APBA2	4.58756e-06	-0.0451237	0.088	0.137	0.078305
DKC1	4.7953e-06	-0.0411757	0.098	0.15	0.081851
DNAJA2	4.82017e-06	-0.0444457	0.136	0.194	0.0822755
APOL2	4.83534e-06	-0.0514125	0.128	0.185	0.0825344
ABCE1	4.88083e-06	-0.0450428	0.084	0.131	0.0833108
FCRL6	4.9421e-06	-0.0797049	0.254	0.321	0.0843567
SUPT6H	4.95515e-06	-0.0564395	0.16	0.22	0.0845795
RNF187	5.04591e-06	-0.0402081	0.086	0.134	0.0861287
TP53BP1	5.09758e-06	-0.04422	0.069	0.112	0.0870106
IPO9	5.27175e-06	-0.0522336	0.088	0.135	0.0899836
ITPK1	5.27545e-06	-0.0374903	0.065	0.107	0.0900466
GART	5.28697e-06	-0.0413361	0.077	0.123	0.0902432
TYK2	5.45e-06	-0.0400878	0.1	0.152	0.093026
WDR48	5.62124e-06	-0.0435422	0.105	0.158	0.0959489
FAM98B	5.66719e-06	-0.0412857	0.069	0.112	0.0967332
LAG3	5.68148e-06	0.0657225	0.136	0.083	0.0969771
PTP4A2	5.70323e-06	-0.064088	0.716	0.81	0.0973484
MON1B	5.74748e-06	-0.0394631	0.102	0.154	0.0981037
APLP2	5.77683e-06	-0.07529	0.206	0.27	0.0986047
RMND5A	5.89497e-06	-0.0470406	0.118	0.173	0.100621
SLC20A1	5.90083e-06	-0.0538027	0.198	0.265	0.100721
PDCD2	6.01464e-06	-0.0491285	0.111	0.164	0.102664
FMR1	6.04493e-06	-0.0506954	0.156	0.216	0.103181
SECISBP2L	6.06291e-06	-0.0594735	0.162	0.221	0.103488
CNPPD1	6.08669e-06	-0.0361205	0.069	0.112	0.103894
TDP2	6.20184e-06	-0.0413117	0.088	0.136	0.105859
CSNK1G3	6.26578e-06	-0.0524257	0.149	0.207	0.106951
SNRNP200	6.28834e-06	-0.0563252	0.348	0.429	0.107336
ARMC8	6.29517e-06	-0.0433833	0.067	0.109	0.107452
AQR	6.39111e-06	-0.0447027	0.104	0.156	0.10909
PPIP5K2	6.46424e-06	-0.0469428	0.102	0.153	0.110338
ARAP2	6.47108e-06	-0.0699286	0.378	0.455	0.110455
FAF1	6.49057e-06	-0.0364371	0.066	0.108	0.110787
SSH2	6.4953e-06	-0.0564856	0.185	0.249	0.110868
DENND1B	6.49678e-06	-0.0426812	0.078	0.123	0.110894
NBN	6.51442e-06	-0.0455671	0.104	0.156	0.111195
BUB3	6.55144e-06	-0.0685949	0.257	0.326	0.111827
SAR1A	6.62408e-06	-0.0554312	0.201	0.266	0.113066
EIF2B5	6.66701e-06	-0.0426234	0.091	0.14	0.113799
MED13L	6.69631e-06	-0.0478136	0.151	0.211	0.114299
SNX17	6.71082e-06	-0.0409118	0.139	0.198	0.114547
LAMTOR1	6.92195e-06	-0.0402787	0.088	0.136	0.118151
FAM172A	7.07933e-06	-0.0435971	0.084	0.13	0.120837
PPCS	7.35271e-06	-0.0392593	0.079	0.124	0.125503
AHSA2	7.38207e-06	-0.0518534	0.132	0.188	0.126005
PPP2R2D	7.42844e-06	-0.037818	0.073	0.117	0.126796
RAB2A	7.64151e-06	-0.0486589	0.159	0.219	0.130433
G3BP1	7.7043e-06	-0.0723187	0.26	0.327	0.131505
KDM4B	7.72098e-06	-0.0407051	0.073	0.116	0.131789
USP10	7.78289e-06	-0.0462249	0.109	0.161	0.132846
PRRC2C	7.87536e-06	-0.0679698	0.628	0.732	0.134424
TPM4	7.88869e-06	-0.0654659	0.243	0.312	0.134652
WARS	7.89284e-06	-0.0378147	0.061	0.101	0.134723
GFM1	7.90421e-06	-0.0441271	0.066	0.107	0.134917
BPTF	8.01988e-06	-0.0921578	0.415	0.487	0.136891
RALA	8.03997e-06	-0.0339867	0.062	0.103	0.137234
FAM76B	8.10573e-06	-0.0415239	0.091	0.139	0.138357
NSMCE4A	8.16598e-06	-0.0362102	0.073	0.117	0.139385
MANF	8.19787e-06	-0.0489416	0.095	0.143	0.139929
CUL3	8.26763e-06	-0.0496214	0.126	0.181	0.14112
SMAD2	8.28164e-06	-0.0463091	0.109	0.161	0.141359
GMPS	8.33294e-06	-0.0442107	0.087	0.134	0.142235
XPA	8.46437e-06	-0.0419928	0.074	0.117	0.144478
UBLCP1	8.47615e-06	-0.038783	0.075	0.119	0.144679
LONP2	8.52591e-06	-0.0389594	0.14	0.199	0.145529
MKRN1	8.52813e-06	-0.061384	0.209	0.274	0.145567
PLEKHB2	8.58028e-06	-0.0484754	0.119	0.172	0.146457
TRPC4AP	8.6412e-06	-0.0379026	0.08	0.125	0.147497
DOCK8	8.81038e-06	-0.0551781	0.345	0.425	0.150384
PDHB	8.90491e-06	-0.0361093	0.066	0.107	0.151998
CEP350	9.10381e-06	-0.0873509	0.37	0.44	0.155393
CD8B	9.14791e-06	-0.0458637	0.223	0.295	0.156146
KLHDC2	9.14904e-06	-0.0390303	0.068	0.11	0.156165
PTPN22	9.16597e-06	-0.0442662	0.159	0.22	0.156454
RNF168	9.27619e-06	-0.05446	0.137	0.192	0.158335
POLE3	9.37437e-06	-0.0444804	0.085	0.131	0.160011
ALOX5AP	9.42361e-06	0.0661278	0.154	0.1	0.160852
RRP36	9.47574e-06	-0.0362102	0.072	0.115	0.161741
DDX24	9.48866e-06	-0.0567153	0.327	0.403	0.161962
HNRNPA3	9.59026e-06	0.108957	0.394	0.331	0.163696
DLD	9.6327e-06	-0.0388708	0.064	0.104	0.16442
HEATR5B	9.64448e-06	-0.0360647	0.075	0.119	0.164622
DCTD	9.70154e-06	-0.035838	0.084	0.13	0.165596
CLEC2B	9.80445e-06	-0.0468318	0.181	0.245	0.167352
UBA1	9.89503e-06	-0.0475079	0.114	0.166	0.168898
BAZ2B	9.93236e-06	-0.0582175	0.133	0.188	0.169535
ERLEC1	1.00171e-05	-0.0426619	0.115	0.168	0.170981
[truncated: 1,748 more rows]

## Sheet: CD14_COVID
Differentially expressed genes in CD14+ monocytes for survival vs. non-survival COVID ICU patients
gene	p_val	avg_logFC	pct.1	pct.2	p_val_adj
IFI27	0	1.07316	0.784	0.287	0
IFITM3	0	0.70403	0.845	0.561	0
LSP1	0	0.665418	0.441	0.027	0
RNF213	0	0.566897	0.95	0.75	0
EEF1A1	0	0.5484	0.985	0.775	0
BCAS4	0	0.520479	0.396	0.047	0
RN7SL4P	0	0.507673	0.326	0.021	0
AHNAK	0	0.490021	0.999	0.964	0
UQCR11	0	0.420449	0.323	0.027	0
STUB1	0	-0.265546	0.065	0.347	0
PHB	0	-0.273963	0.067	0.349	0
DNASE1L1	0	-0.299195	0.076	0.384	0
NOL7	0	-0.31995	0.07	0.4	0
GNB2L1	0	-0.324788	0.99	0.997	0
ILK	0	-0.324852	0.036	0.374	0
ADCY7	0	-0.325844	0.149	0.495	0
OST4	0	-0.325997	0.166	0.526	0
EIF4A1	0	-0.328001	0.123	0.487	0
PAIP2	0	-0.334478	0.236	0.601	0
NT5C2	0	-0.337813	0.176	0.527	0
ARHGDIA	0	-0.338318	0.176	0.541	0
IFNAR2	0	-0.343802	0.148	0.503	0
CD302	0	-0.347061	0.171	0.521	0
SQRDL	0	-0.353398	0.279	0.649	0
CYTIP	0	-0.357095	0.25	0.612	0
PRDX1	0	-0.364372	0.31	0.689	0
PPP1CA	0	-0.365771	0.254	0.667	0
SLC25A6	0	-0.369223	0.9	0.952	0
NUDT3	0	-0.37265	0.18	0.535	0
SRGN	0	-0.374495	0.998	0.999	0
CEBPA	0	-0.378702	0.078	0.45	0
CD63	0	-0.378907	0.955	0.983	0
TMEM259	0	-0.379753	0.196	0.602	0
MAFF	0	-0.38129	0.083	0.373	0
SRSF2	0	-0.382904	0.386	0.731	0
PYURF	0	-0.38339	0.059	0.448	0
PLIN3	0	-0.383974	0.367	0.729	0
JDP2	0	-0.400359	0.189	0.533	0
PGK1	0	-0.40201	0.91	0.964	0
KLF9	0	-0.403621	0.177	0.516	0
CCT5	0	-0.404635	0.326	0.705	0
ACAA1	0	-0.413239	0.151	0.565	0
MAFG	0	-0.416093	0.171	0.547	0
PTGS2	0	-0.417178	0.079	0.372	0
NFIL3	0	-0.418404	0.347	0.695	0
SH3BP5	0	-0.420095	0.102	0.475	0
JHDM1D	0	-0.421898	0.083	0.48	0
MYL6	0	-0.42228	0.997	1	0
TUBB4B	0	-0.424035	0.159	0.539	0
H3F3B	0	-0.426271	0.992	0.997	0
VIM	0	-0.427326	1	1	0
EEF1D	0	-0.441138	0.682	0.887	0
FDPS	0	-0.446736	0.098	0.524	0
PRELID1	0	-0.447659	0.175	0.627	0
TAGAP	0	-0.456622	0.235	0.637	0
PNP	0	-0.458546	0.159	0.579	0
C17orf76-AS1	0	-0.459639	0.07	0.515	0
ETS2	0	-0.463439	0.266	0.649	0
KLF6	0	-0.468686	0.987	0.992	0
SQSTM1	0	-0.469612	0.198	0.631	0
LDLR	0	-0.477569	0.268	0.614	0
CXCR4	0	-0.478189	0.194	0.549	0
PPP1R15A	0	-0.480499	0.912	0.959	0
CHMP1B	0	-0.485526	0.231	0.655	0
PPP1R15B	0	-0.487268	0.395	0.731	0
SAP30	0	-0.49108	0.1	0.493	0
SLA	0	-0.491622	0.605	0.841	0
CSRNP1	0	-0.491911	0.195	0.618	0
CD83	0	-0.499948	0.151	0.505	0
PNPLA8	0	-0.50224	0.391	0.725	0
TRMT6	0	-0.503351	0.216	0.63	0
TPT1	0	-0.505655	0.999	1	0
S100A9	0	-0.506585	0.998	1	0
DDIT4	0	-0.509945	0.078	0.447	0
PSMA6	0	-0.51456	0.097	0.606	0
IGKC	0	-0.516536	0.053	0.385	0
MCL1	0	-0.518427	0.974	0.993	0
SLC31A2	0	-0.519361	0.075	0.549	0
SUN2	0	-0.529934	0.29	0.754	0
PLP2	0	-0.531586	0.139	0.648	0
NR4A2	0	-0.541618	0.218	0.649	0
ATF3	0	-0.547885	0.13	0.516	0
KLF4	0	-0.554371	0.877	0.948	0
S100A8	0	-0.579423	0.998	0.999	0
SAMSN1	0	-0.583099	0.237	0.693	0
FKBP5	0	-0.603172	0.876	0.968	0
MYADM	0	-0.615192	0.688	0.847	0
UBB	0	-0.634062	0.501	0.873	0
TIPARP	0	-0.647732	0.196	0.634	0
C20orf24	0	-0.657143	0.101	0.709	0
TUBA1B	0	-0.664898	0.135	0.656	0
ANXA1	0	-0.685546	0.991	0.997	0
DUSP1	0	-0.68822	0.942	0.948	0
SERPINB2	0	-0.68914	0.088	0.426	0
CD68	0	-0.716605	0.115	0.745	0
FOS	0	-0.756308	0.998	0.988	0
JUN	0	-0.759233	0.918	0.926	0
TSC22D3	0	-0.760231	0.766	0.944	0
PPIB	0	-0.763244	0.277	0.811	0
FOSB	0	-0.7929	0.842	0.959	0
GAPDH	0	-0.867027	0.959	0.999	0
EREG	0	-0.899986	0.116	0.485	0
LYZ	0	-0.910959	0.999	1	0
IL8	0	-1.0066	0.777	0.861	0
FTH1	0	-1.15591	0.763	0.964	0
IL1R2	0	-1.2496	0.03	0.389	0
IFI30	0	-1.28127	0.688	0.96	0
THBS1	0	-1.33536	0.314	0.593	0
CCL3	9.10139e-307	-0.342224	0.056	0.325	1.93577e-302
UQCRQ	1.65797e-306	-0.330471	0.27	0.64	3.52633e-302
KLF2	7.76048e-306	-0.427868	0.321	0.676	1.65058e-301
POMP	1.60335e-305	-0.345683	0.292	0.656	3.41016e-301
ADAM17	1.74736e-305	-0.362843	0.196	0.536	3.71647e-301
MGAT2	2.86512e-305	-0.221233	0.017	0.24	6.09381e-301
RASGEF1B	4.32844e-305	-0.373372	0.127	0.435	9.20616e-301
TMED9	4.27961e-304	-0.393653	0.518	0.8	9.1023e-300
C19orf59	7.62155e-302	-0.529582	0.752	0.844	1.62103e-297
UBALD2	3.23288e-299	-0.378684	0.295	0.655	6.87601e-295
ERH	4.03872e-298	-0.30791	0.207	0.548	8.58995e-294
NDUFS6	3.06279e-297	-0.317261	0.211	0.555	6.51424e-293
EIF3C	1.68989e-296	0.399287	0.31	0.046	3.59423e-292
IL1B	1.6064e-294	-0.533159	0.124	0.43	3.41665e-290
ESRRA	5.44905e-294	-0.257096	0.057	0.315	1.15896e-289
MAP2K1	1.06476e-293	-0.327302	0.245	0.596	2.26463e-289
EGR2	2.52335e-291	-0.331463	0.052	0.303	5.36692e-287
ETFB	2.49862e-290	-0.301943	0.167	0.49	5.31432e-286
EAF1	1.35219e-289	-0.395011	0.213	0.543	2.87598e-285
TMBIM4	8.58536e-289	0.330492	0.264	0.023	1.82602e-284
ZNF394	7.39976e-288	-0.328756	0.184	0.508	1.57386e-283
NAMPT	7.89517e-288	-0.507701	0.76	0.869	1.67922e-283
SH3BGRL3	9.05204e-286	-0.365475	0.911	0.955	1.92528e-281
PSMD7	1.56535e-285	-0.314655	0.261	0.617	3.32934e-281
NHP2	2.16598e-284	-0.237229	0.046	0.288	4.60681e-280
PHB2	5.13014e-284	-0.297673	0.208	0.544	1.09113e-279
IGHG3	1.94978e-283	-0.455787	0.09	0.356	4.14699e-279
PET100	1.49115e-282	-0.242569	0.066	0.325	3.17153e-278
H3F3A	1.38315e-281	0.434448	0.371	0.102	2.94183e-277
GABARAP	1.3467e-280	-0.262176	0.088	0.363	2.86429e-276
HIST2H2AA4	2.81178e-280	0.337414	0.24	0.014	5.98037e-276
MSN	5.36514e-280	0.375755	0.983	0.932	1.14111e-275
UPP1	1.01999e-279	-0.365576	0.48	0.781	2.16942e-275
HNRNPAB	3.48983e-279	-0.363077	0.264	0.601	7.42253e-275
DDIT3	4.06398e-278	-0.259125	0.069	0.327	8.64369e-274
HCAR3	1.75657e-277	-0.305527	0.072	0.334	3.73604e-273
CLK1	4.59437e-277	-0.343257	0.264	0.606	9.77176e-273
PER1	4.95353e-275	-0.300091	0.167	0.484	1.05357e-270
AHR	5.2064e-275	-0.411704	0.269	0.599	1.10735e-270
NDUFS7	7.6553e-275	-0.249345	0.09	0.361	1.62821e-270
NDUFA1	1.19215e-273	-0.347734	0.421	0.742	2.53558e-269
SPSB3	3.03813e-273	-0.226003	0.04	0.269	6.46181e-269
GLIPR1	2.24903e-272	-0.385147	0.647	0.84	4.78347e-268
PSMA1	1.10326e-271	0.311247	0.248	0.021	2.34652e-267
MAN2A2	1.1495e-271	-0.276184	0.12	0.411	2.44487e-267
IGLC3	1.04013e-270	0.49487	0.278	0.041	2.21226e-266
ADAR	3.64434e-269	0.451466	0.876	0.678	7.75114e-265
PPP2CA	1.61802e-267	-0.320576	0.312	0.662	3.44138e-263
TREM1	7.08407e-267	-0.327324	0.173	0.48	1.50671e-262
FCAR	7.72488e-267	-0.265398	0.098	0.372	1.643e-262
RFXANK	1.01494e-266	-0.254201	0.089	0.353	2.15868e-262
C3AR1	1.17267e-266	-0.362805	0.194	0.502	2.49415e-262
KDM7A	6.52455e-266	0.33437	0.257	0.027	1.38771e-261
SEC11A	2.37088e-265	-0.335227	0.423	0.75	5.04261e-261
CLIC1	2.72581e-264	-0.341341	0.501	0.788	5.79752e-260
TMEM176B	3.66911e-264	-0.498243	0.316	0.607	7.80382e-260
NDUFB2	2.28425e-263	-0.305053	0.284	0.628	4.85837e-259
ETF1	7.81382e-262	-0.341441	0.337	0.677	1.66192e-257
NAPRT1	1.07562e-261	-0.285053	0.186	0.499	2.28774e-257
TMSB4X	2.74867e-260	0.321676	1	0.989	5.84614e-256
LDHB	2.84494e-260	-0.356861	0.276	0.607	6.0509e-256
ARL4A	4.98814e-260	-0.275708	0.117	0.395	1.06093e-255
IDS	2.29427e-259	0.304755	0.235	0.019	4.87968e-255
PLIN2	1.11714e-257	-0.411703	0.246	0.561	2.37604e-253
ORMDL2	1.20802e-257	-0.236125	0.069	0.314	2.56934e-253
TRMT112	4.84207e-257	-0.272741	0.179	0.489	1.02986e-252
METRNL	1.20705e-256	-0.31352	0.251	0.576	2.56727e-252
MAZ	1.53421e-254	-0.204131	0.032	0.243	3.26311e-250
NANS	2.00429e-254	-0.282318	0.171	0.473	4.26293e-250
SLC25A5	3.93224e-254	-0.312284	0.28	0.617	8.36348e-250
PTPN1	2.76061e-253	-0.319618	0.278	0.606	5.87154e-249
YPEL5	3.12039e-253	-0.404938	0.574	0.792	6.63675e-249
C12orf44	3.97948e-253	-0.212807	0.044	0.267	8.46396e-249
ODC1	4.78948e-253	-0.274765	0.101	0.363	1.01867e-248
TPST1	1.0013e-252	-0.237853	0.042	0.261	2.12967e-248
TMED1	1.62561e-251	-0.21031	0.033	0.243	3.45752e-247
AES	3.68156e-250	-0.252519	0.132	0.413	7.83032e-246
ACO2	4.31401e-250	-0.236169	0.08	0.328	9.17546e-246
EGR1	6.83236e-250	-0.574916	0.172	0.455	1.45317e-245
EIF4A3	8.79544e-249	-0.290786	0.186	0.488	1.8707e-244
COX7A2	2.60953e-248	-0.301267	0.375	0.715	5.5502e-244
ZFAS1	7.11827e-248	-0.291921	0.317	0.67	1.51398e-243
NDUFA13	1.74604e-247	-0.269006	0.194	0.499	3.71366e-243
FADD	3.54815e-247	-0.198913	0.019	0.208	7.54657e-243
GABARAPL1	1.79648e-245	-0.272589	0.116	0.384	3.82093e-241
PNRC2	1.56968e-244	0.289007	0.235	0.024	3.33854e-240
IDI1	4.59754e-244	-0.289573	0.202	0.509	9.77851e-240
H2AFZ	1.59719e-243	-0.333566	0.292	0.621	3.39707e-239
DNTTIP2	7.06612e-243	-0.38573	0.449	0.723	1.50289e-238
SAT1	7.67129e-243	-0.413408	0.95	0.97	1.63161e-238
RYBP	9.63063e-242	-0.347273	0.194	0.488	2.04834e-237
NLRP3	1.25794e-241	-0.333967	0.225	0.533	2.67552e-237
RNF144B	1.44873e-241	-0.301238	0.188	0.49	3.08131e-237
SHFM1	2.45787e-241	-0.257765	0.176	0.474	5.22763e-237
NFE2L2	1.76068e-240	-0.308863	0.202	0.503	3.74478e-236
CYCS	9.60858e-240	-0.258935	0.153	0.436	2.04365e-235
MMP24-AS1	1.04399e-239	-0.227571	0.079	0.322	2.22047e-235
CNIH4	1.26196e-239	-0.280656	0.217	0.528	2.68407e-235
NEDD8	3.71611e-239	-0.32739	0.527	0.791	7.90379e-235
PCBP1	1.04712e-238	-0.34323	0.697	0.85	2.22712e-234
CXCL2	2.26796e-238	-0.435987	0.123	0.389	4.82373e-234
BUD31	2.68881e-238	-0.242661	0.123	0.393	5.71882e-234
CIDEB	8.36807e-238	-0.19736	0.025	0.216	1.7798e-233
VPS51	2.07635e-237	-0.221702	0.071	0.306	4.41619e-233
MS4A4A	3.42699e-237	-0.306524	0.208	0.507	7.28887e-233
TXNL4A	6.52899e-237	-0.27086	0.247	0.564	1.38865e-232
FRAT1	9.15105e-237	-0.303721	0.198	0.497	1.94634e-232
ARPC1B	2.0376e-236	-0.266096	0.99	0.994	4.33376e-232
MAP3K8	3.97431e-236	-0.363633	0.241	0.542	8.45296e-232
ENY2	4.34632e-236	-0.275587	0.241	0.559	9.24418e-232
HBP1	2.34821e-235	-0.237375	0.112	0.374	4.9944e-231
RELT	9.45398e-235	-0.253597	0.163	0.453	2.01077e-230
SNRPB	4.42717e-234	-0.254608	0.193	0.492	9.41615e-230
COX20	4.87903e-234	-0.196516	0.033	0.232	1.03772e-229
RN7SL5P	2.46816e-233	0.292365	0.206	0.013	5.24954e-229
TMEM176A	4.66152e-233	-0.332037	0.172	0.454	9.91458e-229
EIF1	6.66926e-233	-0.302617	0.976	0.989	1.41848e-228
DBI	9.82076e-233	-0.307639	0.35	0.678	2.08878e-228
FAM26F	2.92285e-231	-0.300659	0.077	0.31	6.21662e-227
PTGER2	1.32703e-230	-0.317102	0.191	0.478	2.82245e-226
COX8A	1.13948e-229	-0.289191	0.351	0.684	2.42356e-225
RNF139	3.98943e-228	-0.258825	0.151	0.423	8.48512e-224
SMARCE1	8.99053e-228	-0.237866	0.145	0.419	1.9122e-223
ADAMTS2	1.35974e-226	-0.256385	0.068	0.294	2.89204e-222
HCAR2	3.80766e-226	-0.296908	0.091	0.328	8.09851e-222
MRFAP1	4.47418e-225	-0.274273	0.32	0.653	9.51614e-221
STX11	1.39875e-224	-0.292072	0.265	0.576	2.97501e-220
FLT3	1.8813e-224	-0.291399	0.099	0.342	4.00133e-220
TUBA1C	2.26718e-224	-0.241122	0.095	0.338	4.82206e-220
PDE4B	3.73674e-224	-0.341563	0.117	0.368	7.94767e-220
C6orf48	3.53837e-223	-0.277351	0.25	0.562	7.52575e-219
CCNL1	7.78016e-223	-0.352853	0.883	0.935	1.65476e-218
H3F3C	3.21539e-222	0.286603	0.253	0.042	6.83882e-218
IRS2	3.361e-222	-0.43885	0.617	0.785	7.14852e-218
SNHG5	4.28135e-222	-0.363298	0.511	0.75	9.10601e-218
HLA-DQB1	2.03529e-221	-0.268423	0.062	0.279	4.32887e-217
MYH9	2.95168e-221	0.320445	0.994	0.967	6.27792e-217
GGNBP2	6.38526e-221	-0.314657	0.339	0.654	1.35808e-216
NUCKS1	8.756e-220	-0.348678	0.255	0.549	1.86231e-215
NDUFS5	2.39722e-219	-0.254373	0.26	0.576	5.09864e-215
CD97	4.81708e-219	-0.351098	0.398	0.692	1.02454e-214
CERS2	7.20298e-219	-0.213741	0.104	0.351	1.532e-214
MAP1LC3B	4.42146e-218	-0.296819	0.329	0.647	9.404e-214
LMNA	4.80135e-218	-0.507619	0.094	0.324	1.0212e-213
TMSB10	8.62266e-218	-0.256381	1	1	1.83395e-213
ANAPC15	2.50607e-217	-0.191967	0.042	0.238	5.33015e-213
UGP2	6.15018e-217	-0.274586	0.281	0.596	1.30808e-212
CYC1	6.49733e-217	-0.270384	0.254	0.556	1.38192e-212
ACTB	8.65969e-217	0.270182	1	0.999	1.84183e-212
MALAT1	1.49512e-216	0.255068	1	0.994	3.17997e-212
POC1B-GALNT4	3.33573e-216	-0.194922	0.024	0.202	7.09477e-212
GPR183	3.89493e-216	-0.330752	0.085	0.313	8.28412e-212
IER3	5.905e-216	-0.413653	0.1	0.338	1.25593e-211
IVNS1ABP	1.24678e-215	-0.296726	0.242	0.543	2.65177e-211
BTG2	4.95014e-215	-0.346728	0.255	0.549	1.05285e-210
COX6C	5.93907e-215	-0.265969	0.326	0.656	1.26318e-210
PHC2	6.53973e-215	-0.266789	0.239	0.538	1.39094e-210
CDKN1A	1.57234e-214	-0.540386	0.363	0.617	3.34421e-210
LAMTOR5	1.24233e-213	-0.265493	0.275	0.585	2.64232e-209
INSIG1	4.20303e-213	-0.317142	0.166	0.432	8.93941e-209
LSM1	1.25502e-212	-0.19833	0.062	0.272	2.6693e-208
PRDX5	1.90287e-212	-0.312272	0.498	0.763	4.04721e-208
CRIP1	3.30312e-212	0.321944	0.204	0.019	7.02541e-208
SERPINA1	5.97548e-212	0.399083	0.956	0.849	1.27092e-207
HK3	9.0465e-212	-0.346385	0.489	0.738	1.9241e-207
PSMB6	9.69087e-212	-0.28877	0.428	0.73	2.06115e-207
ZBTB16	5.50727e-211	-0.20108	0.026	0.203	1.17134e-206
SLC38A2	4.34659e-210	-0.353459	0.353	0.651	9.24476e-206
RN7SL128P	7.52334e-210	0.261528	0.189	0.013	1.60014e-205
JMJD6	7.53396e-210	-0.252742	0.182	0.459	1.6024e-205
VAMP5	1.40437e-209	-0.389528	0.296	0.584	2.98695e-205
PDIA6	2.94515e-209	-0.372696	0.401	0.675	6.26404e-205
PUF60	4.22915e-209	-0.239705	0.207	0.495	8.99499e-205
CLCN7	4.45811e-209	-0.201621	0.068	0.283	9.48196e-205
MX1	6.83151e-209	0.492996	0.682	0.438	1.45299e-204
SRSF7	3.67478e-208	-0.326148	0.39	0.684	7.81588e-204
H2AFV	5.08809e-207	-0.288237	0.289	0.592	1.08219e-202
ARL8B	6.89987e-206	-0.247219	0.269	0.578	1.46753e-201
DNAJC8	7.26127e-206	-0.256058	0.251	0.549	1.5444e-201
DNAJA1	1.00489e-205	-0.346908	0.701	0.843	2.13731e-201
ACTG1	2.16407e-205	-0.252306	0.998	0.998	4.60276e-201
LARP7	2.42727e-205	-0.253634	0.199	0.478	5.16257e-201
ITGA2B	6.80761e-205	-0.231373	0.026	0.198	1.44791e-200
SNRPD2	3.74312e-204	-0.299333	0.514	0.769	7.96123e-200
COX4I1	3.83423e-204	-0.239021	0.97	0.984	8.15503e-200
TSR3	2.35562e-203	-0.201073	0.1	0.332	5.01018e-199
RILPL2	2.90043e-203	-0.336224	0.694	0.842	6.16892e-199
GNA15	2.18862e-202	-0.250065	0.23	0.52	4.65498e-198
LGALS8	2.74447e-201	-0.259975	0.289	0.595	5.83722e-197
MIR24-2	2.77792e-201	-0.194762	0.072	0.287	5.90836e-197
P4HB	9.14907e-201	-0.299302	0.698	0.853	1.94591e-196
SNHG6	1.45805e-200	-0.229014	0.164	0.428	3.10114e-196
IDH3B	3.71063e-200	-0.226894	0.18	0.45	7.89214e-196
BCL2A1	1.07953e-199	-0.309889	0.354	0.653	2.29605e-195
PLEKHB2	2.68989e-199	-0.26684	0.307	0.61	5.72113e-195
FBXW5	6.77801e-199	-0.249949	0.293	0.602	1.44161e-194
EMC6	1.16042e-198	-0.152153	0.021	0.183	2.4681e-194
CDC42SE1	1.32041e-197	-0.257782	0.325	0.639	2.80838e-193
TWF2	1.07827e-196	-0.216408	0.16	0.421	2.29337e-192
LDHA	3.45027e-196	-0.301952	0.894	0.933	7.33839e-192
RAB1A	3.90705e-196	-0.258062	0.352	0.671	8.30991e-192
PARK7	4.74359e-196	-0.278327	0.453	0.733	1.00891e-191
TCIRG1	2.68e-195	-0.305904	0.554	0.784	5.70009e-191
CCDC107	2.92385e-195	-0.155907	0.016	0.171	6.21874e-191
NUBP1	5.61674e-195	-0.1932	0.062	0.26	1.19462e-190
MARCO	9.27816e-195	-0.380505	0.203	0.463	1.97337e-190
UBE2I	9.51462e-195	-0.231681	0.254	0.549	2.02366e-190
SKP1	1.15793e-194	-0.23422	0.297	0.608	2.46281e-190
SRSF10	1.31115e-194	0.229232	0.181	0.014	2.78867e-190
RBM3	4.70304e-194	-0.330347	0.757	0.855	1.00029e-189
GADD45GIP1	1.65448e-193	-0.23974	0.196	0.465	3.51891e-189
RAB8A	1.45827e-192	-0.228009	0.199	0.471	3.10159e-188
PPIF	2.20836e-192	-0.287047	0.16	0.409	4.69696e-188
TAF1D	2.7564e-192	-0.24015	0.173	0.432	5.8626e-188
TUFM	4.58336e-192	-0.243191	0.287	0.586	9.74834e-188
DDT	4.73529e-192	-0.170092	0.05	0.239	1.00715e-187
NDUFA6	1.10773e-191	-0.226686	0.195	0.465	2.35603e-187
FAM53C	5.7984e-191	-0.202589	0.101	0.326	1.23326e-186
ENSA	6.48935e-191	-0.286212	0.538	0.778	1.38022e-186
CIRBP	1.73664e-190	-0.246941	0.272	0.566	3.69366e-186
HSD17B10	3.10402e-190	-0.226259	0.181	0.444	6.60194e-186
PDE4D	3.4584e-190	-0.247527	0.11	0.334	7.35567e-186
PFKFB3	2.43112e-189	-0.266798	0.159	0.41	5.17074e-185
PIM3	4.86271e-189	-0.270662	0.237	0.516	1.03425e-184
DCTN3	3.00774e-188	-0.207092	0.164	0.42	6.39716e-184
SELK	1.97259e-187	-0.220658	0.17	0.427	4.19549e-183
SMIM7	3.19607e-187	-0.199812	0.127	0.364	6.79772e-183
KXD1	1.60833e-186	-0.171866	0.062	0.256	3.42076e-182
CALM3	2.30852e-186	-0.305775	0.54	0.77	4.90998e-182
RSRC2	2.82216e-186	-0.304026	0.445	0.716	6.00244e-182
ASPH	2.947e-186	-0.26607	0.191	0.45	6.26798e-182
HMGN1	3.12979e-186	-0.242029	0.156	0.401	6.65674e-182
PGS1	3.69737e-186	-0.19242	0.081	0.289	7.86393e-182
PSMA2	7.25777e-186	0.221853	0.188	0.021	1.54366e-181
PABPN1	2.12487e-185	-0.190451	0.094	0.31	4.51939e-181
TMBIM1	7.5607e-185	-0.211143	0.179	0.438	1.60809e-180
SLC16A3	7.90025e-185	-0.269902	0.379	0.682	1.6803e-180
DUSP2	8.04424e-185	-0.304379	0.062	0.252	1.71093e-180
MINOS1	2.06233e-184	-0.197631	0.124	0.357	4.38636e-180
ICAM2	2.79878e-184	-0.166806	0.035	0.204	5.95272e-180
C14orf2	2.80248e-184	-0.230977	0.309	0.614	5.9606e-180
HERPUD1	4.63946e-184	-0.240859	0.245	0.526	9.86767e-180
TFRC	5.2432e-184	-0.290916	0.136	0.369	1.11518e-179
SMCO4	9.12621e-184	-0.238173	0.197	0.457	1.94105e-179
SDHB	9.42867e-184	-0.226694	0.25	0.535	2.00538e-179
ARAP1	3.23251e-183	-0.236082	0.306	0.608	6.87523e-179
MPEG1	5.5824e-183	0.337313	0.952	0.784	1.18732e-178
IFRD1	1.15943e-182	-0.217248	0.119	0.346	2.46599e-178
GZF1	2.41994e-182	-0.207395	0.09	0.301	5.14698e-178
SGMS1	3.51262e-182	-0.213823	0.15	0.394	7.471e-178
TCP1	5.95509e-182	-0.233139	0.232	0.506	1.26659e-177
IER5	9.4673e-182	-0.269495	0.214	0.48	2.0136e-177
FAM129B	1.34715e-181	-0.249732	0.263	0.544	2.86525e-177
RBPJ	1.93435e-181	-0.292845	0.436	0.707	4.11417e-177
RNF7	1.94985e-181	-0.220422	0.245	0.527	4.14714e-177
UFC1	2.26453e-181	-0.227355	0.246	0.531	4.81642e-177
MAT2A	2.04607e-180	-0.198755	0.093	0.303	4.35178e-176
C16orf80	2.71811e-180	-0.188771	0.051	0.231	5.78116e-176
NACC2	3.94761e-180	-0.261042	0.289	0.576	8.39616e-176
FKBP3	5.39721e-180	-0.191063	0.123	0.353	1.14793e-175
USP22	1.16785e-179	-0.206198	0.158	0.404	2.48391e-175
CDK9	1.34786e-179	-0.203374	0.125	0.352	2.86677e-175
NDUFB9	1.85315e-179	-0.245879	0.352	0.659	3.94146e-175
RHOA	5.49932e-179	-0.221273	0.989	0.993	1.16965e-174
TBC1D14	1.21904e-178	-0.212764	0.152	0.394	2.59277e-174
CERS6	1.92695e-178	-0.204938	0.115	0.338	4.09843e-174
CHMP2A	5.05696e-178	-0.2712	0.473	0.739	1.07556e-173
LAPTM4A	9.8403e-178	-0.259857	0.419	0.707	2.09293e-173
SLC16A6	1.32535e-177	-0.256021	0.098	0.305	2.8189e-173
RAB2A	2.12059e-177	-0.240595	0.339	0.642	4.51029e-173
ACAT2	3.25436e-177	-0.173464	0.042	0.213	6.92171e-173
EGLN2	3.73187e-177	-0.190918	0.105	0.321	7.93732e-173
RETN	4.56312e-177	-0.494712	0.224	0.462	9.70529e-173
B2M	6.14433e-177	-0.246155	1	1	1.30684e-172
SEC31B	6.46581e-177	-0.167189	0.055	0.236	1.37521e-172
PSMC3	2.11572e-176	-0.229546	0.229	0.496	4.49993e-172
BLOC1S1	7.98072e-176	-0.222269	0.218	0.482	1.69742e-171
SEC61B	1.65695e-175	-0.220441	0.232	0.498	3.52416e-171
SLC25A25	1.94733e-175	-0.165324	0.039	0.207	4.14177e-171
JUND	2.67514e-175	-0.277187	0.443	0.719	5.68975e-171
OTOF	3.47616e-175	0.37696	0.193	0.028	7.39344e-171
TERF2IP	4.07457e-175	-0.239086	0.291	0.578	8.66621e-171
CXorf21	4.41871e-175	-0.218376	0.123	0.346	9.39816e-171
DDX3Y	5.24891e-175	-0.399732	0.258	0.494	1.11639e-170
MPPE1	7.89386e-175	-0.167485	0.051	0.228	1.67894e-170
CERKL	1.92465e-174	0.235342	0.186	0.024	4.09353e-170
MRPL51	8.37087e-174	-0.207467	0.155	0.392	1.7804e-169
SNF8	9.01064e-174	-0.199955	0.187	0.443	1.91647e-169
EIF5A	1.36406e-173	-0.206062	0.209	0.473	2.90121e-169
LLPH	5.80923e-173	-0.182869	0.101	0.312	1.23557e-168
STX10	1.45898e-172	-0.242416	0.345	0.643	3.1031e-168
CD37	1.50955e-172	-0.21861	0.179	0.428	3.21066e-168
TMEM160	2.1668e-172	-0.201689	0.132	0.359	4.60857e-168
DCTN2	2.52097e-172	-0.203473	0.197	0.455	5.36185e-168
CD163	2.78157e-172	-0.529336	0.826	0.843	5.91613e-168
SEC13	1.17803e-171	-0.210429	0.206	0.465	2.50556e-167
PSMB7	1.30812e-171	-0.216533	0.286	0.574	2.78224e-167
FLVCR2	2.14323e-171	-0.217919	0.162	0.399	4.55843e-167
FTL	3.24748e-171	0.231231	0.999	0.997	6.90706e-167
IGHA1	5.17273e-171	-0.318012	0.085	0.278	1.10019e-166
ZNF331	5.39605e-171	-0.272695	0.064	0.245	1.14769e-166
CCT4	6.92236e-171	-0.209977	0.176	0.419	1.47232e-166
RTFDC1	1.21713e-170	-0.219892	0.29	0.576	2.58871e-166
MFSD12	1.45713e-170	-0.154227	0.046	0.218	3.09917e-166
NDUFB8	1.90435e-170	0.208271	0.178	0.021	4.05037e-166
PSMC2	3.23209e-170	-0.21293	0.215	0.474	6.87434e-166
PLK3	4.02824e-170	-0.182152	0.08	0.276	8.56767e-166
TANK	4.40633e-170	-0.215755	0.228	0.494	9.37183e-166
SNW1	4.9398e-170	-0.223383	0.27	0.551	1.05065e-165
MFGE8	8.4375e-170	-0.146734	0.01	0.14	1.79457e-165
NME1	8.78526e-170	-0.191254	0.08	0.275	1.86854e-165
EIF6	1.37492e-169	-0.202344	0.176	0.422	2.92431e-165
C17orf62	3.13642e-169	-0.227299	0.305	0.593	6.67085e-165
ZBTB43	3.6718e-169	-0.277775	0.166	0.397	7.80954e-165
XAF1	5.35168e-169	0.339063	0.801	0.585	1.13825e-164
AZIN1	6.7041e-169	-0.224395	0.238	0.504	1.4259e-164
STRAP	1.07141e-168	-0.200196	0.179	0.425	2.27878e-164
PSMA3	2.66989e-168	-0.208752	0.222	0.484	5.67859e-164
PSMA5	2.86603e-168	-0.205551	0.188	0.437	6.09577e-164
ARL5B	3.52954e-168	-0.18387	0.062	0.242	7.50698e-164
TAP2	4.76383e-168	0.204125	0.166	0.016	1.01322e-163
SLC7A6OS	8.2785e-168	-0.160293	0.033	0.188	1.76075e-163
OAS2	8.95358e-168	0.52624	0.531	0.364	1.90434e-163
MRPL9	9.65568e-168	-0.170818	0.066	0.25	2.05367e-163
KLC1	1.05412e-167	-0.184426	0.122	0.341	2.24201e-163
VTI1B	2.11453e-167	-0.198852	0.162	0.4	4.4974e-163
TRA2A	2.89874e-167	-0.201347	0.182	0.43	6.16532e-163
PSMD13	3.07717e-167	-0.220295	0.28	0.562	6.54484e-163
ZMYM6NB	4.26572e-167	-0.134955	0.018	0.156	9.07277e-163
PAG1	5.53667e-167	-0.268201	0.285	0.555	1.17759e-162
C19orf10	9.0419e-167	-0.209785	0.191	0.437	1.92312e-162
SHC1	2.66295e-166	-0.164739	0.064	0.245	5.66383e-162
CHTOP	2.84167e-166	-0.199822	0.184	0.432	6.04395e-162
IRAK1	4.01581e-166	-0.242265	0.336	0.627	8.54123e-162
ADAP1	5.57202e-166	-0.185776	0.126	0.345	1.18511e-161
CXCL3	1.12542e-165	-0.320357	0.074	0.261	2.39365e-161
FAM20A	1.17456e-165	-0.209587	0.154	0.383	2.49817e-161
FPR2	1.71065e-165	-0.216289	0.198	0.447	3.63838e-161
WDR6	2.27956e-165	-0.166177	0.055	0.229	4.8484e-161
GSTO1	3.34025e-165	-0.263652	0.539	0.774	7.10437e-161
RAB3D	4.3373e-165	-0.229601	0.289	0.57	9.22501e-161
PSMC5	9.44274e-165	-0.234073	0.306	0.586	2.00838e-160
H2AFJ	9.48471e-165	-0.209875	0.21	0.465	2.0173e-160
MPG	9.72766e-165	-0.151855	0.04	0.201	2.06898e-160
ENO1	1.98213e-164	-0.2234	0.992	0.995	4.2158e-160
GYG1	3.5367e-164	-0.20663	0.223	0.483	7.52222e-160
ST3GAL1	3.74483e-164	-0.246311	0.214	0.464	7.96487e-160
PINK1	4.01755e-164	-0.16287	0.052	0.223	8.54494e-160
OAS3	5.19272e-164	0.571411	0.478	0.294	1.10444e-159
PRDX3	5.20559e-164	-0.208041	0.23	0.49	1.10718e-159
VIM-AS1	5.7133e-164	-0.166004	0.068	0.252	1.21516e-159
AKR1A1	1.22698e-163	-0.219323	0.235	0.496	2.60967e-159
ARF4	1.73383e-163	-0.203402	0.199	0.446	3.68768e-159
ITPK1	2.58679e-163	-0.209693	0.288	0.57	5.50183e-159
CCT7	2.68899e-163	-0.219631	0.235	0.496	5.71922e-159
CD82	2.74738e-163	-0.240931	0.258	0.526	5.8434e-159
CWC25	4.20338e-163	-0.225232	0.214	0.469	8.94018e-159
RIPK2	5.50358e-163	-0.199271	0.137	0.359	1.17056e-158
TAPSAR1	1.28437e-162	-0.197095	0.173	0.413	2.73172e-158
LAIR1	1.63236e-162	-0.24506	0.298	0.571	3.47186e-158
C10orf137	2.8635e-162	-0.136698	0.014	0.144	6.09038e-158
QARS	4.01931e-162	-0.210242	0.222	0.48	8.54867e-158
UBE2K	5.13336e-162	-0.222472	0.288	0.561	1.09181e-157
MRPS18A	7.61145e-162	-0.139938	0.028	0.175	1.61888e-157
BECN1	2.61742e-161	-0.187572	0.156	0.387	5.567e-157
PSTPIP1	5.00991e-161	-0.224817	0.317	0.605	1.06556e-156
HSPA9	1.30669e-160	-0.231124	0.288	0.561	2.7792e-156
TMEM39A	1.90263e-160	-0.166311	0.06	0.235	4.04671e-156
HEXB	2.54097e-160	-0.229512	0.347	0.634	5.40439e-156
TAF13	2.73572e-160	-0.18744	0.114	0.321	5.8186e-156
NIPA2	3.42543e-160	-0.186439	0.119	0.33	7.28555e-156
PDAP1	4.09312e-160	-0.209416	0.206	0.452	8.70565e-156
NOC2L	5.39925e-160	-0.163324	0.068	0.248	1.14837e-155
CCM2	8.33503e-160	-0.208739	0.209	0.456	1.77278e-155
PRPF19	1.52381e-159	-0.18711	0.127	0.34	3.24099e-155
LRRC59	1.7869e-159	-0.196284	0.158	0.388	3.80056e-155
OXSR1	1.94935e-159	-0.250307	0.237	0.488	4.14608e-155
MYEOV2	1.08933e-158	-0.200277	0.27	0.545	2.31689e-154
RABL6	1.30045e-158	-0.210339	0.231	0.488	2.76593e-154
ARPC4	1.60112e-158	-0.240823	0.487	0.747	3.40541e-154
TAGLN2	1.71309e-158	-0.30868	0.552	0.757	3.64357e-154
MRPL20	1.85204e-158	-0.176566	0.114	0.321	3.93909e-154
SLC25A28	2.37697e-158	-0.197687	0.172	0.406	5.05559e-154
UBE2F	2.53578e-158	-0.180241	0.138	0.357	5.39335e-154
NDUFA2	2.75613e-158	-0.188922	0.192	0.436	5.86202e-154
RGS2	3.8059e-158	-0.388177	0.87	0.886	8.09478e-154
MRPL14	1.04019e-157	-0.176298	0.12	0.33	2.21239e-153
ARF3	1.4975e-157	-0.201965	0.225	0.48	3.18504e-153
RALY	2.75408e-157	-0.204341	0.28	0.554	5.85765e-153
C7orf41	3.18825e-157	-0.13902	0.012	0.136	6.78109e-153
AZI2	3.31976e-157	-0.175463	0.102	0.302	7.0608e-153
SIGLEC1	6.50821e-157	0.429448	0.388	0.188	1.38423e-152
GRPEL1	1.16995e-156	-0.194439	0.158	0.386	2.48838e-152
GNPTG	3.36245e-156	-0.18899	0.153	0.378	7.15159e-152
CTSD	3.40034e-156	-0.285221	0.971	0.975	7.23219e-152
PMAIP1	3.71316e-156	-0.197914	0.088	0.277	7.89751e-152
PPIG	4.47015e-156	-0.253259	0.33	0.604	9.50756e-152
PELI1	1.44213e-155	-0.247425	0.183	0.415	3.06726e-151
SOD1	4.93837e-155	-0.217679	0.28	0.549	1.05034e-150
HSF1	7.87768e-155	-0.161652	0.079	0.263	1.6755e-150
C2orf15	7.92156e-155	-0.12274	0.014	0.14	1.68484e-150
POLR2C	8.3274e-155	-0.168143	0.095	0.289	1.77116e-150
TES	8.85324e-155	-0.237008	0.296	0.562	1.883e-150
DCAF8	2.21835e-154	0.187682	0.154	0.015	4.71821e-150
ZDHHC20	3.2388e-154	-0.213127	0.171	0.398	6.88861e-150
NUCB2	3.45307e-154	-0.211061	0.151	0.37	7.34432e-150
AGPAT6	3.85832e-154	-0.189901	0.157	0.382	8.20625e-150
TAF10	3.96364e-154	-0.193544	0.238	0.495	8.43026e-150
NARF	4.13028e-154	-0.1848	0.148	0.369	8.78468e-150
TMX4	4.64564e-154	-0.288349	0.325	0.589	9.88082e-150
RAB1B	6.24881e-154	-0.159974	0.081	0.265	1.32906e-149
NAP1L1	8.53706e-154	-0.239623	0.37	0.655	1.81575e-149
SEC63	9.79975e-154	-0.225333	0.268	0.529	2.08431e-149
RECQL	1.00138e-153	-0.205164	0.136	0.347	2.12983e-149
C12orf57	1.69946e-153	-0.174643	0.071	0.249	3.61458e-149
MRPS18C	1.71599e-153	-0.156141	0.064	0.236	3.64974e-149
EIF3M	2.02604e-153	-0.198068	0.248	0.509	4.30919e-149
NUDT16	2.16677e-153	-0.224448	0.295	0.57	4.6085e-149
MLEC	2.19396e-153	-0.226565	0.217	0.461	4.66633e-149
SERTAD1	3.01477e-153	-0.17806	0.068	0.242	6.41211e-149
MAPKAPK3	3.48164e-153	-0.219097	0.358	0.645	7.40509e-149
OAZ1	2.25258e-152	-0.194126	0.998	0.999	4.79101e-148
ZNF276	2.5377e-152	-0.185815	0.097	0.288	5.39743e-148
EIF3I	4.86372e-152	-0.201291	0.252	0.509	1.03447e-147
NDUFA12	7.21231e-152	-0.193259	0.189	0.425	1.53399e-147
MKI67IP	1.00516e-151	-0.125561	0.017	0.145	2.13787e-147
TRAM1	1.13412e-151	-0.217207	0.299	0.57	2.41216e-147
FAM50A	2.03567e-151	-0.193215	0.202	0.445	4.32967e-147
ZBTB11	2.04292e-151	-0.212738	0.12	0.32	4.3451e-147
ANPEP	2.07259e-151	0.377827	0.522	0.332	4.40819e-147
JTB	2.34279e-151	-0.232483	0.524	0.768	4.98288e-147
RIT1	2.46493e-151	-0.208932	0.235	0.485	5.24267e-147
ING3	3.32544e-151	-0.177054	0.116	0.32	7.07288e-147
PLK2	4.34387e-151	-0.177187	0.035	0.181	9.23897e-147
COX7C	4.79e-151	-0.234506	0.688	0.842	1.01878e-146
PRDM8	5.17077e-151	-0.206991	0.024	0.158	1.09977e-146
PLEKHJ1	5.49194e-151	-0.178827	0.141	0.356	1.16808e-146
CBX6	6.85674e-151	-0.193002	0.145	0.36	1.45836e-146
TMEM179B	8.85894e-151	-0.148901	0.05	0.209	1.88421e-146
PPP4C	2.22642e-150	-0.19119	0.248	0.508	4.73537e-146
SRRM2	2.28554e-150	0.302534	0.84	0.71	4.86111e-146
MGST1	2.94842e-150	-0.202076	0.221	0.464	6.27099e-146
DOK1	4.00746e-150	-0.189661	0.155	0.374	8.52347e-146
PSMD1	4.58682e-150	-0.228289	0.311	0.577	9.7557e-146
CBWD6	5.08805e-150	0.215099	0.195	0.039	1.08218e-145
EPC1	7.45826e-150	-0.217986	0.232	0.477	1.5863e-145
CLTA	1.24874e-149	-0.226024	0.386	0.666	2.65595e-145
AKIRIN2	3.55824e-149	-0.190048	0.192	0.427	7.56803e-145
SMDT1	5.9825e-149	-0.190643	0.212	0.457	1.27242e-144
FKBP2	6.49753e-149	-0.18104	0.127	0.334	1.38196e-144
UBAP1	6.82481e-149	-0.181073	0.169	0.397	1.45157e-144
RER1	7.39131e-149	-0.178355	0.184	0.416	1.57206e-144
ZFP36	1.20834e-148	-0.355696	0.808	0.865	2.57002e-144
ANXA2	1.31604e-148	-0.23879	0.983	0.985	2.79908e-144
PSMD3	1.39509e-148	-0.177704	0.15	0.367	2.96722e-144
CUEDC2	2.99212e-148	-0.177233	0.154	0.373	6.36394e-144
PHPT1	5.01288e-148	-0.169575	0.104	0.298	1.06619e-143
TTC7A	6.48833e-148	-0.205301	0.262	0.52	1.38e-143
SRI	6.51295e-148	-0.181791	0.19	0.426	1.38524e-143
LRG1	1.31653e-147	-0.176843	0.055	0.216	2.80012e-143
ACTR2	1.51889e-147	-0.23258	0.99	0.988	3.23053e-143
SERINC1	1.86326e-147	-0.234934	0.394	0.665	3.96297e-143
LAMTOR1	3.00566e-147	-0.219694	0.36	0.643	6.39273e-143
PSMA7	4.89146e-147	-0.238023	0.772	0.871	1.04036e-142
IGHG4	4.93857e-147	-0.278654	0.115	0.308	1.05038e-142
FEM1A	5.13674e-147	-0.112207	0.01	0.125	1.09253e-142
PHLDA1	6.5922e-147	-0.232888	0.04	0.187	1.4021e-142
LSMD1	7.61868e-147	-0.193796	0.242	0.497	1.62042e-142
FBXO11	8.00472e-147	-0.186928	0.185	0.418	1.70252e-142
SPTY2D1	1.16804e-146	-0.208297	0.188	0.418	2.48431e-142
IRF2BP2	2.04851e-146	-0.236166	0.344	0.616	4.35699e-142
SPAG9	2.71634e-146	-0.229794	0.235	0.476	5.77739e-142
IGHG1	6.44676e-146	-0.289773	0.142	0.343	1.37116e-141
ARL6IP1	9.82646e-146	-0.200767	0.18	0.404	2.08999e-141
GTF2B	1.02013e-145	-0.161878	0.099	0.288	2.16972e-141
RAB5C	1.02245e-145	-0.182412	0.196	0.431	2.17464e-141
FXR1	1.22643e-145	-0.207325	0.275	0.536	2.60849e-141
NDUFB10	1.85675e-145	-0.201032	0.335	0.616	3.94913e-141
ECH1	2.65345e-145	-0.214993	0.292	0.548	5.64362e-141
PPM1B	2.80506e-145	-0.180906	0.151	0.364	5.96607e-141
COX5A	3.14601e-145	-0.184898	0.255	0.512	6.69125e-141
HBEGF	3.40149e-145	-0.279059	0.127	0.324	7.23462e-141
CALM2	4.83895e-145	-0.257138	0.876	0.916	1.0292e-140
JSRP1	6.67367e-145	-0.114984	0.008	0.118	1.41942e-140
CYB561A3	8.00035e-145	-0.149217	0.056	0.216	1.70159e-140
VAT1	8.2273e-145	-0.187138	0.161	0.381	1.74986e-140
CPT1A	8.40592e-145	-0.219321	0.325	0.595	1.78785e-140
UQCRC2	9.01303e-145	-0.190695	0.268	0.528	1.91698e-140
NUCB1	9.0712e-145	-0.228358	0.4	0.675	1.92935e-140
HADHB	1.54641e-144	-0.196282	0.282	0.546	3.28907e-140
MRPL28	1.87419e-144	-0.179418	0.159	0.375	3.9862e-140
TMED2	3.18465e-144	-0.196608	0.248	0.499	6.77344e-140
UBE2H	4.29183e-144	-0.191011	0.193	0.424	9.12828e-140
NDEL1	4.80191e-144	-0.17634	0.134	0.338	1.02132e-139
EIF3F	5.66953e-144	-0.19695	0.296	0.563	1.20585e-139
S1PR4	6.41852e-144	-0.176413	0.158	0.376	1.36516e-139
EIF4A2	9.4792e-144	-0.242013	0.405	0.67	2.01613e-139
PSMD8	1.06208e-143	-0.184785	0.271	0.534	2.25895e-139
CPNE1	1.18352e-143	-0.189387	0.164	0.382	2.51723e-139
CCND3	1.48258e-143	-0.249372	0.767	0.871	3.15329e-139
TCEB1	3.06985e-143	-0.165133	0.128	0.33	6.52926e-139
C6orf47	3.56686e-143	-0.150025	0.051	0.206	7.58635e-139
HNRNPA2B1	3.62047e-143	-0.262592	0.994	0.993	7.70037e-139
HPCAL1	3.90815e-143	-0.189619	0.226	0.47	8.31225e-139
KPNB1	4.72021e-143	-0.254805	0.458	0.701	1.00394e-138
SLC3A2	5.86653e-143	-0.201504	0.253	0.504	1.24775e-138
MORF4L2	7.32264e-143	-0.180955	0.175	0.4	1.55745e-138
SDR39U1	7.98048e-143	-0.124036	0.024	0.154	1.69737e-138
CCDC59	8.00539e-143	-0.180351	0.146	0.355	1.70267e-138
MAPK6	1.03945e-142	-0.196063	0.134	0.335	2.21081e-138
PHF15	1.33301e-142	-0.126553	0.011	0.125	2.83518e-138
SGMS2	1.48143e-142	-0.184333	0.114	0.307	3.15085e-138
SLC15A3	4.50652e-142	-0.179314	0.199	0.434	9.58492e-138
ICAM1	5.05648e-142	-0.189322	0.093	0.274	1.07546e-137
ARFGAP1	5.34803e-142	-0.179518	0.136	0.339	1.13747e-137
SSNA1	6.70023e-142	-0.169642	0.167	0.39	1.42507e-137
RAB5A	7.24408e-142	-0.176967	0.186	0.414	1.54074e-137
PHF17	8.14628e-142	-0.145277	0.024	0.154	1.73263e-137
NAP1L4	1.19757e-141	-0.196735	0.186	0.41	2.54711e-137
CSRP1	1.72509e-141	-0.174246	0.153	0.366	3.66909e-137
PCBP2	1.88325e-141	-0.213199	0.411	0.689	4.00549e-137
POLR2G	2.65286e-141	-0.177008	0.167	0.384	5.64236e-137
CTSB	2.81905e-141	-0.273364	0.996	0.993	5.99584e-137
PFDN2	5.19099e-141	-0.170784	0.125	0.322	1.10407e-136
TMEM170B	6.24244e-141	-0.221247	0.306	0.569	1.32771e-136
EMP3	6.96428e-141	-0.212203	0.291	0.549	1.48123e-136
MAPKAPK2	1.15824e-140	-0.199062	0.287	0.546	2.46346e-136
SSBP1	1.3217e-140	-0.176479	0.219	0.461	2.81113e-136
DNTTIP1	1.34829e-140	-0.194925	0.213	0.446	2.86769e-136
TRIM25	1.44509e-140	-0.22929	0.325	0.582	3.07357e-136
RNF146	1.4949e-140	-0.170279	0.082	0.255	3.1795e-136
MDH2	1.6021e-140	-0.181403	0.245	0.494	3.40751e-136
KHNYN	1.91246e-140	-0.158804	0.105	0.293	4.0676e-136
SNHG8	6.53419e-140	-0.148059	0.068	0.234	1.38976e-135
NCLN	2.12912e-139	-0.163833	0.132	0.334	4.52843e-135
IER2	2.51593e-139	-0.362763	0.527	0.711	5.35112e-135
RABGGTB	2.69605e-139	-0.155299	0.086	0.262	5.73422e-135
UBAC2	3.00796e-139	-0.170604	0.155	0.369	6.39763e-135
GLA	3.38626e-139	-0.160055	0.09	0.268	7.20224e-135
YWHAG	3.67396e-139	-0.23934	0.461	0.705	7.81415e-135
SIGLEC10	3.84599e-139	-0.219854	0.218	0.453	8.18003e-135
MAX	5.94359e-139	-0.178091	0.182	0.406	1.26414e-134
UXT	6.47122e-139	-0.177626	0.19	0.416	1.37636e-134
ANKRD28	8.13317e-139	-0.196884	0.101	0.283	1.72984e-134
MRPL33	1.54348e-138	-0.162912	0.132	0.332	3.28283e-134
HLA-G	2.08641e-138	-0.187694	0.208	0.44	4.43759e-134
C1orf63	2.73164e-138	-0.261071	0.285	0.526	5.80993e-134
KBTBD8	3.2937e-138	-0.144415	0.027	0.157	7.00538e-134
C11orf31	3.77874e-138	-0.161712	0.126	0.324	8.03701e-134
SNAP23	4.6178e-138	-0.172069	0.184	0.407	9.8216e-134
PRPF38B	4.96462e-138	-0.221507	0.332	0.596	1.05592e-133
PCMT1	5.82001e-138	-0.196706	0.308	0.575	1.23786e-133
SMIM12	5.89373e-138	-0.15997	0.138	0.342	1.25354e-133
RAB21	7.0975e-138	-0.187239	0.244	0.487	1.50957e-133
PQLC1	7.11171e-138	-0.161809	0.144	0.351	1.51259e-133
MANF	7.33696e-138	-0.180285	0.097	0.275	1.5605e-133
DHX15	7.52351e-138	-0.185384	0.22	0.454	1.60018e-133
JARID2	8.10372e-138	-0.221166	0.336	0.6	1.72358e-133
SURF4	8.17686e-138	-0.192474	0.258	0.508	1.73914e-133
TOMM22	1.36862e-137	-0.165509	0.144	0.35	2.91093e-133
KLHL2	1.51694e-137	-0.15725	0.109	0.298	3.22638e-133
PPP1CB	2.05703e-137	-0.231637	0.427	0.684	4.3751e-133
NOP58	4.96084e-137	-0.191388	0.153	0.359	1.05512e-132
TNFAIP6	4.97086e-137	-0.183973	0.043	0.186	1.05725e-132
HNRNPR	6.26605e-137	-0.255659	0.43	0.674	1.33273e-132
HGS	6.51967e-137	-0.154362	0.08	0.251	1.38667e-132
TUBB1	6.9323e-137	-0.178292	0.037	0.175	1.47443e-132
FRAT2	1.26713e-136	-0.196134	0.23	0.47	2.69506e-132
FBL	1.50514e-136	-0.176598	0.181	0.402	3.20129e-132
VNN1	1.66625e-136	-0.216295	0.061	0.215	3.54394e-132
CTDSP1	2.03414e-136	-0.191186	0.298	0.559	4.32642e-132
ID2	2.2983e-136	-0.36004	0.559	0.712	4.88825e-132
TRAPPC3	2.55482e-136	-0.162519	0.169	0.387	5.43384e-132
UQCRH	3.29708e-136	-0.226116	0.539	0.76	7.01256e-132
BATF	3.31113e-136	-0.161474	0.097	0.278	7.04244e-132
CMAS	3.9912e-136	-0.175708	0.144	0.348	8.48888e-132
MXD1	4.77996e-136	-0.263346	0.48	0.71	1.01665e-131
AIMP2	5.01186e-136	-0.126176	0.028	0.157	1.06597e-131
PSMB5	6.14886e-136	-0.165685	0.105	0.287	1.3078e-131
CSNK1A1	8.67907e-136	-0.19913	0.312	0.571	1.84595e-131
AHSA1	1.08023e-135	-0.170363	0.125	0.319	2.29754e-131
ZC3H12A	1.10425e-135	-0.163888	0.062	0.219	2.34864e-131
PSPC1	1.15077e-135	-0.185526	0.18	0.398	2.44758e-131
OSER1	1.16626e-135	-0.170072	0.131	0.327	2.48052e-131
RLF	2.01435e-135	-0.193258	0.154	0.36	4.28431e-131
OXA1L	2.44514e-135	-0.181184	0.249	0.496	5.20056e-131
CHMP6	3.0742e-135	-0.124104	0.029	0.159	6.53851e-131
PSMD14	3.14127e-135	-0.171209	0.118	0.307	6.68116e-131
GIMAP7	5.26297e-135	-0.255702	0.279	0.516	1.11938e-130
TMEM199	7.48135e-135	-0.146427	0.062	0.219	1.59121e-130
PTOV1	8.24968e-135	-0.153891	0.096	0.274	1.75463e-130
GPCPD1	8.61789e-135	-0.27785	0.59	0.76	1.83294e-130
EMC10	9.83856e-135	-0.167494	0.157	0.366	2.09256e-130
CRLS1	1.15207e-134	-0.160244	0.103	0.284	2.45033e-130
C1orf43	1.29541e-134	-0.192021	0.326	0.59	2.7552e-130
RNPEPL1	1.50505e-134	-0.188791	0.272	0.525	3.20109e-130
CIR1	1.56349e-134	-0.189022	0.248	0.494	3.32539e-130
MLX	2.59321e-134	-0.16281	0.141	0.343	5.5155e-130
EXOC7	2.94883e-134	-0.168219	0.161	0.371	6.27188e-130
TBCB	3.53025e-134	-0.179095	0.224	0.459	7.5085e-130
IFT20	4.03379e-134	-0.152297	0.084	0.254	8.57946e-130
QSOX1	6.47952e-134	-0.196184	0.309	0.569	1.37813e-129
UBL5	7.53263e-134	-0.227369	0.517	0.743	1.60212e-129
HEXIM1	7.62056e-134	-0.207308	0.216	0.443	1.62082e-129
AGFG1	7.84402e-134	-0.212175	0.37	0.641	1.66834e-129
PPFIA1	7.89359e-134	-0.208823	0.247	0.484	1.67889e-129
PIN1	8.59854e-134	-0.161359	0.137	0.335	1.82882e-129
ZNF24	9.36392e-134	-0.195049	0.242	0.481	1.99161e-129
POLR2E	1.42619e-133	-0.166477	0.165	0.377	3.03336e-129
PDK4	1.87686e-133	-0.24094	0.081	0.246	3.9919e-129
ATL3	2.1734e-133	-0.18254	0.167	0.377	4.62261e-129
ZMAT2	2.38256e-133	-0.187418	0.277	0.531	5.06746e-129
UBE2E1	3.52712e-133	-0.157657	0.165	0.379	7.50184e-129
TRA2B	4.07532e-133	-0.255122	0.748	0.857	8.66779e-129
PRMT2	5.94095e-133	-0.197456	0.257	0.497	1.26358e-128
TOMM20	8.90979e-133	-0.19153	0.254	0.497	1.89502e-128
MCM3AP	1.00555e-132	-0.166237	0.157	0.364	2.13871e-128
MRPL23	1.69927e-132	-0.17346	0.201	0.425	3.61418e-128
CXCL1	1.87249e-132	-0.273682	0.036	0.169	3.9826e-128
CSGALNACT2	1.95532e-132	-0.283586	0.479	0.696	4.15877e-128
ROMO1	2.79147e-132	-0.171063	0.194	0.415	5.93719e-128
EMP1	2.88669e-132	-0.365075	0.116	0.293	6.1397e-128
UPF1	3.02978e-132	-0.162565	0.141	0.341	6.44404e-128
COPS6	5.86298e-132	-0.163543	0.186	0.409	1.247e-127
COQ10B	6.46493e-132	-0.155509	0.104	0.284	1.37503e-127
FMN1	7.57217e-132	-0.197014	0.12	0.307	1.61053e-127
SYAP1	9.52151e-132	-0.184535	0.192	0.412	2.02513e-127
SWAP70	1.03449e-131	-0.218642	0.305	0.556	2.20026e-127
PSMD12	1.1448e-131	-0.169609	0.159	0.365	2.43487e-127
PPM1F	1.1891e-131	-0.191315	0.239	0.475	2.52909e-127
NUDC	1.19968e-131	-0.171715	0.195	0.416	2.55161e-127
RAN	1.66073e-131	-0.183238	0.255	0.499	3.53221e-127
MEA1	2.19573e-131	-0.155305	0.089	0.26	4.67009e-127
DDX27	2.40929e-131	-0.178638	0.177	0.391	5.12431e-127
ITPKC	2.47909e-131	-0.124473	0.031	0.161	5.27277e-127
HAT1	4.55339e-131	-0.154644	0.099	0.275	9.68461e-127
MARK3	5.4978e-131	-0.207796	0.339	0.598	1.16933e-126
LSM6	5.90076e-131	-0.156902	0.108	0.289	1.25503e-126
UROD	6.36183e-131	-0.16866	0.149	0.349	1.3531e-126
HIPK2	8.58496e-131	-0.231002	0.291	0.534	1.82594e-126
DNAJB1	9.83832e-131	-0.182189	0.155	0.357	2.09251e-126
KRT10	1.10823e-130	-0.159463	0.107	0.287	2.3571e-126
BAX	1.2952e-130	-0.153077	0.128	0.321	2.75477e-126
ADSL	1.32936e-130	-0.161271	0.142	0.339	2.82742e-126
KIF13B	1.36961e-130	-0.195382	0.184	0.397	2.91302e-126
DDX3X	1.50294e-130	-0.295147	0.833	0.876	3.1966e-126
IRF1	1.51532e-130	-0.28271	0.336	0.575	3.22293e-126
POLG	1.53159e-130	-0.161416	0.14	0.339	3.25753e-126
TUBA1A	2.3993e-130	-0.358867	0.805	0.835	5.10308e-126
SBDS	2.62832e-130	-0.171982	0.159	0.363	5.59017e-126
CD2BP2	3.0005e-130	-0.158596	0.133	0.327	6.38176e-126
MYL9	3.04135e-130	-0.106614	0.005	0.102	6.46864e-126
PDHB	3.17079e-130	-0.161145	0.145	0.344	6.74396e-126
TNFRSF1A	3.72286e-130	-0.202381	0.34	0.602	7.91815e-126
PSMB1	4.36535e-130	-0.218126	0.524	0.75	9.28466e-126
EIF3J	5.71287e-130	-0.168462	0.161	0.366	1.21507e-125
MOB2	6.78363e-130	-0.147956	0.078	0.242	1.44281e-125
COPB1	8.85731e-130	-0.197419	0.267	0.508	1.88386e-125
DSE	9.6829e-130	-0.225382	0.29	0.53	2.05946e-125
SLC25A3	9.8478e-130	-0.214571	0.837	0.902	2.09453e-125
TWISTNB	1.38243e-129	-0.177623	0.068	0.224	2.94028e-125
NSA2	1.68621e-129	-0.172227	0.244	0.485	3.5864e-125
TOP1	2.60847e-129	-0.206504	0.367	0.634	5.54796e-125
ACSL1	3.15454e-129	-0.287505	0.794	0.852	6.70939e-125
CNPY2	4.21528e-129	-0.145621	0.079	0.242	8.96548e-125
TMEM205	4.89442e-129	-0.157332	0.17	0.381	1.04099e-124
POLR2B	5.52094e-129	-0.177116	0.208	0.432	1.17425e-124
ITPRIP	7.04962e-129	-0.175465	0.174	0.385	1.49938e-124
ARGLU1	9.10839e-129	-0.204615	0.377	0.645	1.93726e-124
IGJ	9.12795e-129	-0.20351	0.077	0.24	1.94142e-124
ZFAND6	1.20601e-128	-0.167999	0.184	0.399	2.56506e-124
ANAPC16	1.42656e-128	-0.161957	0.184	0.4	3.03415e-124
C19orf60	1.63922e-128	-0.166928	0.175	0.386	3.48645e-124
SZRD1	1.91272e-128	-0.169094	0.222	0.452	4.06817e-124
GNL2	2.01242e-128	-0.17733	0.159	0.361	4.28023e-124
MNDA	2.48187e-128	0.236294	0.996	0.976	5.27868e-124
KAT5	3.24292e-128	-0.133172	0.052	0.197	6.89736e-124
MPC2	4.06154e-128	-0.140638	0.072	0.232	8.63848e-124
HMGB2	5.69435e-128	-0.307003	0.805	0.857	1.21113e-123
UBE2L6	5.94066e-128	-0.269285	0.318	0.557	1.26352e-123
POLD4	6.04567e-128	-0.115358	0.027	0.149	1.28585e-123
SLC12A9	7.78694e-128	-0.177115	0.228	0.459	1.6562e-123
NHP2L1	9.61556e-128	-0.165325	0.203	0.426	2.04513e-123
CFL1	1.07244e-127	-0.196808	0.986	0.99	2.28097e-123
ABHD5	1.38055e-127	-0.151698	0.079	0.241	2.93628e-123
LUC7L3	1.49421e-127	-0.210099	0.317	0.569	3.17805e-123
DNAJC7	2.39064e-127	-0.2004	0.298	0.543	5.08464e-123
AP1G2	2.91497e-127	-0.14462	0.071	0.227	6.19985e-123
SRP19	3.05369e-127	-0.142967	0.087	0.254	6.49489e-123
MAP2K7	3.67455e-127	-0.16127	0.136	0.329	7.81541e-123
FAM104A	5.23844e-127	-0.137627	0.068	0.223	1.11416e-122
UBA3	6.04908e-127	-0.181637	0.186	0.396	1.28658e-122
CHCHD2	6.43832e-127	-0.170301	0.303	0.56	1.36937e-122
HAX1	7.99506e-127	-0.146081	0.095	0.266	1.70047e-122
GALNT2	8.3612e-127	-0.184432	0.232	0.459	1.77834e-122
GTF3C6	8.58551e-127	-0.16739	0.154	0.353	1.82605e-122
OPN3	1.04089e-126	-0.119259	0.031	0.157	2.21386e-122
HNRNPF	1.12612e-126	-0.192905	0.383	0.658	2.39515e-122
ZNF330	1.53716e-126	-0.151697	0.108	0.287	3.26938e-122
UBE3A	2.64198e-126	-0.18336	0.26	0.497	5.61922e-122
CEPT1	2.86163e-126	-0.142862	0.084	0.249	6.0864e-122
RASSF1	3.56439e-126	-0.144177	0.089	0.258	7.5811e-122
PPP4R2	4.35866e-126	-0.171882	0.18	0.389	9.27043e-122
HNRNPA0	4.38839e-126	-0.171183	0.234	0.467	9.33366e-122
USP3	4.70244e-126	-0.201873	0.413	0.677	1.00016e-121
DDX54	5.12183e-126	-0.16258	0.142	0.338	1.08936e-121
SAP18	5.36526e-126	-0.180946	0.354	0.625	1.14114e-121
FAM111A	7.49362e-126	-0.211589	0.275	0.513	1.59382e-121
PA2G4	7.68995e-126	-0.161481	0.16	0.363	1.63558e-121
USMG5	9.41917e-126	-0.168568	0.272	0.516	2.00336e-121
HECA	2.23069e-125	-0.196206	0.278	0.52	4.74446e-121
WDR13	2.3327e-125	-0.15502	0.134	0.325	4.96142e-121
LIMK2	2.47205e-125	-0.183938	0.152	0.347	5.2578e-121
CD151	2.7922e-125	-0.176775	0.206	0.424	5.93873e-121
TIMM8B	6.24885e-125	-0.159105	0.164	0.367	1.32907e-120
FBXL15	6.3338e-125	-0.15381	0.125	0.311	1.34714e-120
FBXW7	7.19039e-125	-0.189514	0.24	0.469	1.52932e-120
DNAJB2	7.69999e-125	-0.140822	0.061	0.21	1.63771e-120
EIF3G	8.26494e-125	-0.190981	0.4	0.67	1.75787e-120
HOTAIRM1	1.01397e-124	-0.146255	0.078	0.236	2.1566e-120
DPM3	1.28933e-124	-0.148054	0.111	0.291	2.74227e-120
MAFK	1.32694e-124	-0.121129	0.033	0.159	2.82227e-120
SSBP4	2.1142e-124	-0.138285	0.084	0.248	4.49669e-120
CBX3	2.20859e-124	-0.179701	0.325	0.583	4.69745e-120
H1FX	2.42908e-124	-0.274935	0.382	0.617	5.16642e-120
CCT3	2.71136e-124	-0.182236	0.292	0.541	5.76679e-120
IWS1	3.22527e-124	-0.177899	0.195	0.409	6.85984e-120
COX14	4.5105e-124	-0.156156	0.145	0.34	9.59338e-120
RN7SL3	6.68255e-124	0.147913	0.119	0.009	1.42131e-119
AKT1	7.16857e-124	-0.155614	0.135	0.325	1.52468e-119
LYAR	7.62671e-124	-0.166282	0.14	0.33	1.62213e-119
TUBB6	1.00771e-123	-0.171196	0.084	0.244	2.1433e-119
NDUFA9	1.04636e-123	-0.138356	0.095	0.264	2.2255e-119
PHF20L1	1.28319e-123	-0.209459	0.361	0.619	2.72922e-119
IL6ST	1.80229e-123	-0.260655	0.31	0.544	3.8333e-119
CHMP1A	1.84877e-123	-0.148824	0.121	0.304	3.93215e-119
ALYREF	2.2883e-123	-0.150744	0.122	0.304	4.86698e-119
IFNGR1	2.39798e-123	-0.272486	0.698	0.815	5.10026e-119
LTV1	2.88076e-123	-0.162896	0.119	0.3	6.12708e-119
SYF2	3.30225e-123	-0.171747	0.322	0.583	7.02355e-119
KLHL18	4.30581e-123	-0.156083	0.134	0.322	9.15803e-119
NR1H2	4.4936e-123	-0.141934	0.098	0.268	9.55743e-119
SIGLEC14	4.76569e-123	-0.130633	0.054	0.196	1.01362e-118
SNX10	7.36802e-123	-0.194436	0.342	0.596	1.5671e-118
SAMM50	7.92692e-123	-0.140213	0.098	0.269	1.68598e-118
2020-09-15	1.03058e-122	-0.184748	0.368	0.633	2.19194e-118
COA6	1.11729e-122	-0.151873	0.1	0.27	2.37636e-118
VAMP8	1.65731e-122	-0.249514	0.742	0.826	3.52493e-118
WDR43	1.75931e-122	-0.162182	0.141	0.331	3.74187e-118
HTATIP2	1.79412e-122	-0.151532	0.164	0.367	3.81591e-118
PPP3R1	2.08887e-122	-0.156021	0.144	0.338	4.44282e-118
U2AF1	2.21181e-122	-0.168332	0.265	0.508	4.7043e-118
ZEB2	2.44715e-122	-0.272081	0.879	0.905	5.20484e-118
HNRNPH2	2.72092e-122	-0.178978	0.229	0.449	5.78713e-118
MKLN1-AS1	2.78445e-122	-0.10438	0.015	0.12	5.92225e-118
TFIP11	3.1035e-122	-0.13411	0.064	0.212	6.60084e-118
ISY1	3.40184e-122	-0.148585	0.102	0.273	7.23538e-118
SYNCRIP	6.72775e-122	-0.21183	0.4	0.65	1.43093e-117
SRSF6	7.4174e-122	-0.176513	0.264	0.5	1.57761e-117
MZT2B	1.0243e-121	-0.172006	0.195	0.406	2.17858e-117
USP47	1.22099e-121	-0.19728	0.25	0.477	2.59693e-117
SNX3	1.44968e-121	-0.190391	0.385	0.654	3.08332e-117
ITGB1BP1	1.5154e-121	-0.152929	0.147	0.34	3.22311e-117
ANXA4	1.55313e-121	-0.175591	0.243	0.472	3.30335e-117
SNIP1	1.74032e-121	-0.142744	0.07	0.222	3.70148e-117
SNHG16	1.74705e-121	-0.117584	0.034	0.158	3.71581e-117
DDX1	2.20117e-121	-0.177619	0.161	0.357	4.68167e-117
LAMTOR4	2.24914e-121	-0.165663	0.351	0.625	4.7837e-117
LACTB	2.57588e-121	-0.198908	0.286	0.521	5.47864e-117
HARS	2.67964e-121	-0.151559	0.106	0.277	5.69932e-117
GTPBP4	3.52177e-121	-0.17042	0.154	0.349	7.49045e-117
DNAJC5	3.75156e-121	-0.177119	0.302	0.55	7.97919e-117
DYNLL2	3.79995e-121	-0.177223	0.265	0.503	8.08211e-117
CDC123	3.80705e-121	-0.154357	0.139	0.328	8.09722e-117
MBD4	4.45008e-121	-0.169697	0.195	0.406	9.46488e-117
WDR33	4.89737e-121	-0.161027	0.162	0.362	1.04162e-116
PPP2R2A	7.00024e-121	-0.155608	0.15	0.345	1.48888e-116
CKLF	8.70051e-121	-0.153873	0.149	0.343	1.85051e-116
WDR83OS	1.17757e-120	-0.157077	0.198	0.412	2.50458e-116
CHCHD7	1.49421e-120	-0.16627	0.144	0.332	3.17804e-116
SAFB2	1.7669e-120	-0.18117	0.207	0.419	3.75802e-116
GAS5	2.09829e-120	-0.16755	0.196	0.409	4.46285e-116
ZBTB21	2.47374e-120	-0.151067	0.078	0.233	5.2614e-116
HLA-DRB5	2.54796e-120	-0.342029	0.307	0.529	5.41925e-116
ACOT8	3.78223e-120	-0.126355	0.049	0.186	8.04442e-116
HMHA1	4.3998e-120	-0.213651	0.614	0.797	9.35794e-116
TCF25	4.84779e-120	-0.19237	0.331	0.581	1.03108e-115
PSMA4	4.8818e-120	-0.24116	0.65	0.802	1.03831e-115
FAM21A	4.91634e-120	0.230673	0.226	0.076	1.04566e-115
NUDT5	5.34298e-120	-0.142634	0.087	0.248	1.1364e-115
TXNDC17	6.01491e-120	-0.151768	0.187	0.396	1.27931e-115
UBE2B	6.58258e-120	-0.156392	0.208	0.425	1.40005e-115
NAA20	6.84091e-120	-0.149774	0.129	0.313	1.45499e-115
NAA50	6.99721e-120	-0.173782	0.269	0.504	1.48824e-115
MID1IP1	7.01396e-120	-0.19313	0.226	0.445	1.4918e-115
PPP2R3C	1.04508e-119	-0.151012	0.142	0.33	2.22279e-115
ZCCHC17	1.40189e-119	-0.14704	0.104	0.274	2.98168e-115
CTNNBL1	1.44691e-119	-0.165966	0.174	0.374	3.07743e-115
BABAM1	1.73706e-119	-0.137426	0.105	0.277	3.69455e-115
ZNHIT1	1.96265e-119	-0.158913	0.252	0.485	4.17436e-115
SURF1	2.44726e-119	-0.151428	0.153	0.348	5.20507e-115
ACAA2	3.16248e-119	-0.153264	0.157	0.353	6.72627e-115
DNAJB9	3.32035e-119	-0.135402	0.06	0.203	7.06204e-115
DDX5	3.33633e-119	-0.218455	0.984	0.984	7.09603e-115
WBP4	3.71311e-119	-0.148133	0.094	0.26	7.89741e-115
KCNN4	4.0579e-119	-0.132133	0.051	0.188	8.63074e-115
CECR1	6.00089e-119	0.327753	0.675	0.56	1.27633e-114
KRR1	6.60339e-119	-0.127957	0.058	0.2	1.40447e-114
ABI1	6.92687e-119	-0.176034	0.27	0.504	1.47328e-114
FUNDC2	7.14275e-119	-0.140589	0.101	0.269	1.51919e-114
NFKBIE	8.35745e-119	-0.163287	0.117	0.292	1.77755e-114
H2AFY	8.94098e-119	-0.184253	0.96	0.976	1.90166e-114
HNRNPL	1.18639e-118	-0.167808	0.273	0.512	2.52333e-114
ILF2	1.46334e-118	-0.159002	0.207	0.423	3.11238e-114
SMEK1	1.60276e-118	-0.205628	0.337	0.584	3.40891e-114
CCT6A	1.78553e-118	-0.188095	0.354	0.612	3.79764e-114
SRF	1.81216e-118	-0.157718	0.147	0.336	3.85429e-114
XIST	1.87971e-118	-0.217037	0.059	0.205	3.99796e-114
EMC7	2.38228e-118	-0.152767	0.188	0.396	5.06688e-114
MRPS5	2.66302e-118	-0.170851	0.243	0.469	5.66397e-114
ANAPC11	2.70927e-118	-0.162142	0.232	0.455	5.76235e-114
TMED3	2.72041e-118	-0.147787	0.113	0.287	5.78604e-114
FAM107B	3.02538e-118	-0.191865	0.375	0.636	6.43468e-114
RGCC	3.23853e-118	-0.215376	0.067	0.211	6.88804e-114
TMEM87A	4.64294e-118	-0.157145	0.154	0.346	9.87507e-114
SIGLEC5	5.85914e-118	0.148794	0.117	0.01	1.24618e-113
AMD1	7.76546e-118	-0.169367	0.211	0.423	1.65164e-113
VPS4A	9.11753e-118	-0.150892	0.141	0.328	1.93921e-113
PDHA1	9.31696e-118	-0.15226	0.135	0.319	1.98162e-113
PTP4A1	1.12274e-117	-0.172234	0.244	0.469	2.38796e-113
OTUD1	1.1831e-117	-0.271278	0.228	0.434	2.51634e-113
DDAH2	1.36462e-117	-0.159824	0.118	0.291	2.90242e-113
COPS5	1.38647e-117	-0.145789	0.13	0.312	2.94888e-113
CNOT2	2.26885e-117	-0.162028	0.228	0.449	4.82562e-113
USF2	2.55973e-117	-0.173771	0.303	0.545	5.44429e-113
SIAH2	2.6956e-117	-0.140592	0.098	0.265	5.73328e-113
TIMM13	2.72702e-117	-0.144376	0.124	0.303	5.8001e-113
RBM47	3.7269e-117	-0.189544	0.332	0.581	7.92674e-113
UBQLN1	5.0487e-117	-0.176335	0.298	0.541	1.07381e-112
DDX49	5.11275e-117	-0.149954	0.119	0.295	1.08743e-112
FAM96B	5.12586e-117	-0.155432	0.221	0.442	1.09022e-112
NDRG1	5.27932e-117	-0.187059	0.277	0.511	1.12286e-112
GLRX3	5.31292e-117	-0.14181	0.097	0.261	1.13001e-112
YTHDF3	5.46737e-117	-0.155975	0.2	0.413	1.16285e-112
PSMB4	5.86097e-117	-0.205866	0.548	0.759	1.24657e-112
COPB2	6.48046e-117	-0.179559	0.308	0.554	1.37833e-112
GTF2A2	7.64779e-117	-0.145681	0.137	0.322	1.62661e-112
IFI6	9.11564e-117	0.361896	0.659	0.5	1.9388e-112
TBL1XR1	1.01251e-116	-0.172291	0.183	0.383	2.15351e-112
SNX17	1.01571e-116	-0.163086	0.328	0.585	2.16032e-112
HLX	1.02455e-116	-0.216659	0.203	0.407	2.17912e-112
CLEC4E	1.22381e-116	-0.217105	0.201	0.402	2.60293e-112
SLC43A2	2.44483e-116	-0.2223	0.332	0.568	5.19991e-112
EBNA1BP2	2.55667e-116	-0.155541	0.108	0.275	5.43779e-112
PITHD1	3.00245e-116	-0.138277	0.072	0.22	6.38592e-112
MGAT4B	3.23171e-116	-0.143813	0.117	0.29	6.87353e-112
GUK1	4.10185e-116	-0.214663	0.514	0.732	8.72422e-112
ARL6IP4	7.41387e-116	-0.103567	0.021	0.128	1.57686e-111
RBM5	8.15975e-116	-0.180375	0.281	0.518	1.7355e-111
PTPMT1	1.04773e-115	-0.114638	0.038	0.163	2.22841e-111
ERLIN1	1.23218e-115	-0.158588	0.139	0.322	2.62072e-111
ELMSAN1	1.25992e-115	-0.1912	0.192	0.394	2.67972e-111
KCNE3	1.64024e-115	-0.170208	0.215	0.429	3.48862e-111
AKAP8	1.97393e-115	-0.160072	0.17	0.365	4.19835e-111
HINT1	2.17883e-115	-0.153674	0.23	0.453	4.63416e-111
LINC00936	2.26748e-115	-0.189744	0.259	0.484	4.82269e-111
PMVK	2.60746e-115	-0.139425	0.09	0.249	5.54581e-111
HSD17B4	2.71748e-115	-0.169106	0.246	0.469	5.7798e-111
APH1A	2.86092e-115	-0.141617	0.166	0.365	6.08489e-111
HTRA2	3.5409e-115	-0.109311	0.024	0.134	7.53113e-111
ZMAT5	3.94307e-115	-0.100503	0.018	0.122	8.38652e-111
ID1	5.90676e-115	-0.137786	0.039	0.163	1.25631e-110
SIK1	6.23055e-115	-0.146442	0.072	0.219	1.32518e-110
TNFAIP3	6.66109e-115	-0.398069	0.585	0.71	1.41675e-110
FBP1	7.89915e-115	-0.198097	0.247	0.463	1.68007e-110
ZFAND2B	8.72753e-115	-0.144112	0.119	0.294	1.85626e-110
PURB	9.36241e-115	-0.162892	0.163	0.356	1.99129e-110
SDE2	1.15474e-114	-0.132066	0.069	0.216	2.45602e-110
VPS29	1.56194e-114	-0.155857	0.274	0.512	3.32208e-110
UFD1L	1.99027e-114	-0.151391	0.164	0.359	4.23311e-110
UTP23	2.14343e-114	-0.147462	0.079	0.23	4.55887e-110
NDUFS4	2.23083e-114	-0.141307	0.118	0.29	4.74475e-110
IMPDH1	2.47497e-114	-0.160631	0.264	0.496	5.26402e-110
ARIH1	2.71455e-114	-0.165708	0.183	0.381	5.77358e-110
PRMT5	3.30094e-114	-0.106873	0.022	0.131	7.02077e-110
RRAS	3.84468e-114	-0.169767	0.15	0.334	8.17725e-110
SLC46A2	3.91704e-114	-0.118957	0.041	0.167	8.33116e-110
PF4	3.93047e-114	-0.137176	0.03	0.146	8.35972e-110
PICK1	4.27278e-114	-0.112591	0.029	0.144	9.08778e-110
ZNRD1-AS1	5.42068e-114	0.166173	0.144	0.026	1.15292e-109
XRCC6	6.78827e-114	-0.186513	0.391	0.652	1.4438e-109
ADRB2	7.89535e-114	-0.156204	0.088	0.243	1.67926e-109
UBXN6	8.24045e-114	-0.147616	0.141	0.325	1.75266e-109
SLC39A7	8.38732e-114	-0.158947	0.14	0.321	1.7839e-109
TNFAIP8	8.58999e-114	-0.177782	0.25	0.471	1.82701e-109
NDUFAF3	8.62181e-114	-0.144065	0.121	0.294	1.83377e-109
FAM89B	8.98773e-114	-0.139118	0.103	0.267	1.9116e-109
UBE2D2	9.06095e-114	-0.151952	0.249	0.478	1.92717e-109
BMP2K	9.4676e-114	-0.155325	0.099	0.26	2.01366e-109
TRADD	1.0226e-113	-0.13813	0.097	0.258	2.17497e-109
TXN	1.22181e-113	-0.166085	0.289	0.525	2.59866e-109
APMAP	1.47126e-113	-0.174133	0.244	0.465	3.12922e-109
PREB	2.19352e-113	-0.1386	0.116	0.288	4.6654e-109
EMC4	2.24948e-113	-0.151132	0.202	0.41	4.78443e-109
SND1	2.81025e-113	-0.174681	0.298	0.534	5.97713e-109
METAP2	2.91442e-113	-0.171836	0.225	0.437	6.19868e-109
HAUS4	3.51166e-113	-0.122631	0.057	0.194	7.46896e-109
U2AF2	3.56558e-113	-0.143757	0.136	0.316	7.58363e-109
TMC6	3.76447e-113	-0.15738	0.161	0.353	8.00664e-109
SBNO2	4.79433e-113	-0.153217	0.146	0.33	1.01971e-108
HIST1H1C	4.80339e-113	-0.199397	0.18	0.373	1.02163e-108
RGS14	5.048e-113	-0.144221	0.143	0.328	1.07366e-108
RAPGEF2	5.68067e-113	-0.170997	0.173	0.368	1.20822e-108
SSRP1	5.96743e-113	-0.182774	0.221	0.428	1.26921e-108
SERPINB6	8.4813e-113	-0.171503	0.279	0.511	1.80389e-108
SRSF3	8.53934e-113	-0.224252	0.688	0.819	1.81623e-108
HSPA8	8.57143e-113	-0.226746	0.563	0.745	1.82306e-108
DAZAP1	9.68039e-113	-0.163622	0.239	0.459	2.05892e-108
METTL3	9.71685e-113	-0.129363	0.061	0.201	2.06668e-108
ZNF644	1.14156e-112	-0.162449	0.142	0.323	2.42798e-108
RANGRF	1.31555e-112	-0.107625	0.025	0.135	2.79803e-108
KCMF1	1.3373e-112	-0.149889	0.161	0.353	2.84429e-108
CEBPB	1.45367e-112	-0.23018	0.349	0.586	3.09181e-108
ENTPD6	1.73283e-112	-0.132643	0.068	0.211	3.68557e-108
FIP1L1	1.92113e-112	-0.153386	0.13	0.306	4.08605e-108
SFT2D1	2.04914e-112	-0.1472	0.163	0.354	4.35832e-108
MGAT1	2.10218e-112	-0.208317	0.436	0.675	4.47113e-108
MRPL16	2.38515e-112	-0.140053	0.14	0.323	5.07297e-108
CNN2	2.63316e-112	-0.170408	0.262	0.487	5.60047e-108
GNAI3	2.70179e-112	-0.170701	0.315	0.559	5.74644e-108
PELO	2.72425e-112	-0.126352	0.05	0.181	5.79421e-108
PPP1R7	3.83358e-112	-0.163156	0.231	0.446	8.15364e-108
FUBP1	4.63612e-112	-0.174012	0.246	0.463	9.86056e-108
DERL1	4.88315e-112	-0.146336	0.153	0.341	1.0386e-107
ARPC5L	4.92798e-112	-0.150406	0.144	0.327	1.04813e-107
IFI44L	5.66468e-112	0.383677	0.444	0.276	1.20482e-107
CCT2	5.8523e-112	-0.159303	0.182	0.38	1.24473e-107
FAM89A	6.63068e-112	-0.123082	0.037	0.158	1.41028e-107
SMAP1	6.76046e-112	-0.127237	0.069	0.212	1.43788e-107
STK17B	6.96251e-112	-0.244684	0.911	0.929	1.48086e-107
AIFM1	8.97706e-112	-0.148412	0.098	0.257	1.90933e-107
TRIB1	9.23668e-112	-0.248334	0.457	0.675	1.96455e-107
SEPHS2	9.624e-112	-0.169347	0.232	0.445	2.04693e-107
ARFGAP2	1.06528e-111	-0.1434	0.13	0.306	2.26573e-107
EIF3L	1.18603e-111	-0.166399	0.354	0.612	2.52256e-107
SNHG12	1.23244e-111	-0.116245	0.034	0.152	2.62127e-107
PAFAH1B1	1.54479e-111	-0.17014	0.353	0.609	3.28561e-107
NAIP	1.68645e-111	0.334845	0.382	0.226	3.58691e-107
SMARCA5	1.98415e-111	-0.207482	0.389	0.63	4.22008e-107
SNRPD3	2.35791e-111	-0.150495	0.182	0.379	5.01505e-107
IL10RB	3.67987e-111	-0.18141	0.39	0.647	7.82671e-107
MED4	4.05336e-111	-0.139941	0.125	0.299	8.6211e-107
TOMM7	4.18794e-111	-0.164134	0.301	0.542	8.90734e-107
BOLA2B	4.22313e-111	0.132051	0.117	0.013	8.98217e-107
STT3A	4.42577e-111	-0.133265	0.1	0.261	9.41316e-107
ZC3H15	4.96961e-111	-0.159961	0.285	0.519	1.05699e-106
COX19	7.3582e-111	-0.131366	0.09	0.247	1.56502e-106
BCAT1	7.47671e-111	-0.163771	0.081	0.229	1.59022e-106
CTNNB1	7.90615e-111	-0.188574	0.299	0.53	1.68156e-106
JAZF1	7.96639e-111	-0.142995	0.12	0.29	1.69437e-106
SRP54	8.0338e-111	-0.153216	0.169	0.361	1.70871e-106
FFAR2	9.01928e-111	-0.207097	0.107	0.267	1.91831e-106
POR	9.58922e-111	-0.149945	0.201	0.407	2.03953e-106
BTBD6	1.13785e-110	-0.122561	0.055	0.188	2.42008e-106
RAB24	1.4109e-110	-0.120464	0.053	0.184	3.00084e-106
PPP2R4	1.44826e-110	-0.139404	0.124	0.296	3.0803e-106
NSRP1	2.06814e-110	-0.170136	0.171	0.362	4.39873e-106
ETFA	2.15793e-110	-0.14598	0.18	0.377	4.58971e-106
CD55	2.65472e-110	-0.245688	0.769	0.842	5.64632e-106
MORF4L1	2.89663e-110	-0.189366	0.488	0.719	6.16084e-106
HMGCL	2.91349e-110	-0.13094	0.066	0.206	6.1967e-106
IGBP1	3.48189e-110	-0.154793	0.224	0.439	7.40562e-106
BCAS2	5.68913e-110	-0.132542	0.084	0.234	1.21002e-105
PPDPF	5.72507e-110	-0.143124	0.142	0.321	1.21766e-105
PPTC7	5.91207e-110	-0.159152	0.215	0.424	1.25744e-105
PDCD2	5.93413e-110	-0.137969	0.136	0.314	1.26213e-105
SDF2L1	6.00951e-110	-0.139703	0.082	0.231	1.27816e-105
NFKBIZ	6.63345e-110	-0.413343	0.667	0.745	1.41087e-105
PARL	7.27265e-110	-0.15932	0.207	0.41	1.54682e-105
VCP	7.51767e-110	-0.219708	0.644	0.789	1.59893e-105
MVP	8.40027e-110	-0.213912	0.545	0.738	1.78665e-105
STOM	9.04531e-110	-0.152188	0.162	0.352	1.92385e-105
TMF1	1.09929e-109	-0.19077	0.277	0.498	2.33808e-105
GLUL	1.21797e-109	-0.284301	0.91	0.913	2.59051e-105
IFT57	1.45066e-109	-0.125783	0.056	0.189	3.0854e-105
CALU	1.649e-109	-0.167988	0.178	0.371	3.50726e-105
MRPS21	1.82369e-109	-0.145355	0.162	0.351	3.8788e-105
MVD	1.94097e-109	-0.127189	0.068	0.208	4.12824e-105
PIP4K2A	2.2873e-109	-0.178458	0.342	0.585	4.86486e-105
SOD2	2.32423e-109	-0.351372	0.837	0.861	4.94341e-105
2020-03-07	2.41504e-109	-0.159233	0.261	0.486	5.13654e-105
UBE2J2	2.65408e-109	-0.141102	0.167	0.357	5.64496e-105
HIST1H2AC	2.88189e-109	-0.147845	0.077	0.223	6.12949e-105
MLLT10	2.99911e-109	-0.153732	0.159	0.345	6.37881e-105
PRPF3	3.23369e-109	-0.155322	0.156	0.339	6.87773e-105
SRP72	3.53901e-109	-0.178939	0.327	0.568	7.52711e-105
FAM20C	3.72401e-109	-0.142454	0.106	0.268	7.92059e-105
APOL2	5.09764e-109	-0.158804	0.149	0.329	1.08422e-104
TUBB2A	5.56218e-109	-0.111556	0.029	0.14	1.18302e-104
ARID4A	6.64205e-109	-0.179186	0.239	0.453	1.4127e-104
GIMAP1	1.16484e-108	-0.172659	0.265	0.486	2.4775e-104
TTC19	1.18927e-108	-0.151327	0.121	0.29	2.52945e-104
HADHA	1.24197e-108	-0.22187	0.826	0.873	2.64154e-104
AHCYL1	1.80741e-108	-0.172144	0.294	0.527	3.84419e-104
SLC52A2	1.8742e-108	-0.11924	0.055	0.187	3.98625e-104
FAM219B	2.06771e-108	-0.132751	0.075	0.22	4.3978e-104
NEMF	2.09302e-108	-0.186776	0.281	0.506	4.45165e-104
RASGRP2	2.38576e-108	-0.152979	0.196	0.397	5.07426e-104
ARHGAP24	2.41859e-108	-0.146039	0.095	0.251	5.14409e-104
ARMC5	3.04335e-108	-0.112482	0.034	0.149	6.47291e-104
ARID4B	3.76961e-108	-0.212262	0.399	0.636	8.01758e-104
PLAUR	3.82815e-108	-0.252829	0.378	0.61	8.14209e-104
ADM	4.05392e-108	-0.239785	0.214	0.409	8.62229e-104
SLU7	4.15772e-108	-0.167923	0.284	0.512	8.84305e-104
GABARAPL2	4.70806e-108	-0.140563	0.218	0.429	1.00136e-103
SRA1	5.17252e-108	-0.158628	0.233	0.448	1.10014e-103
GRASP	6.07794e-108	-0.122855	0.029	0.139	1.29272e-103
VPS4B	6.25471e-108	-0.155624	0.262	0.486	1.33031e-103
EIF3CL	6.92631e-108	0.146819	0.134	0.023	1.47316e-103
UNC45A	8.70191e-108	-0.133444	0.102	0.261	1.85081e-103
HSPA4	1.06424e-107	-0.180366	0.283	0.507	2.26354e-103
RCOR1	1.15527e-107	-0.163475	0.273	0.497	2.45715e-103
CHPT1	1.21234e-107	-0.120281	0.074	0.219	2.57852e-103
NSFL1C	1.30638e-107	-0.143534	0.157	0.343	2.77853e-103
EIF5	1.32054e-107	-0.228716	0.725	0.831	2.80865e-103
POLR2K	1.57577e-107	-0.123249	0.087	0.238	3.35151e-103
KYNU	2.7173e-107	-0.180845	0.201	0.397	5.77943e-103
PYCR2	2.84505e-107	-0.120332	0.067	0.206	6.05113e-103
LASP1	3.28541e-107	-0.186613	0.422	0.666	6.98775e-103
M6PR	3.82815e-107	-0.164134	0.3	0.535	8.14209e-103
JOSD1	5.57206e-107	-0.150408	0.157	0.341	1.18512e-102
VIMP	6.38495e-107	-0.137905	0.154	0.338	1.35802e-102
RBM18	7.94576e-107	-0.134351	0.104	0.263	1.68998e-102
ARMC6	7.96918e-107	-0.118363	0.054	0.183	1.69497e-102
NAA15	8.02465e-107	-0.163917	0.195	0.391	1.70676e-102
AKIRIN1	1.59865e-106	-0.148234	0.246	0.465	3.40017e-102
ARRDC2	1.80594e-106	-0.138643	0.119	0.287	3.84105e-102
TMEM258	3.00705e-106	-0.136843	0.172	0.362	6.3957e-102
FBXO38	3.92258e-106	-0.143869	0.121	0.289	8.34294e-102
PPM1G	4.22996e-106	-0.163289	0.283	0.507	8.99669e-102
CXXC1	4.66207e-106	-0.148339	0.156	0.337	9.91576e-102
NELFE	5.63503e-106	-0.14481	0.193	0.389	1.19851e-101
IMPA2	6.38564e-106	-0.168042	0.306	0.539	1.35816e-101
SPOP	6.59159e-106	-0.148947	0.187	0.384	1.40196e-101
EMD	6.71039e-106	-0.122335	0.061	0.194	1.42723e-101
ARFRP1	8.02501e-106	-0.124611	0.078	0.222	1.70684e-101
RTN4	9.26198e-106	-0.19429	0.892	0.922	1.96993e-101
SNRPN	9.46325e-106	-0.0920488	0.012	0.101	2.01274e-101
CDIPT	1.28492e-105	-0.135821	0.161	0.347	2.73289e-101
AFG3L2	1.53729e-105	-0.148178	0.105	0.262	3.26967e-101
IFFO1	1.5571e-105	-0.145065	0.149	0.329	3.31179e-101
FUCA2	1.88913e-105	-0.150554	0.196	0.394	4.018e-101
C19orf43	1.96855e-105	-0.150827	0.34	0.593	4.18691e-101
STARD7	2.01639e-105	-0.157885	0.284	0.513	4.28866e-101
HIST1H2BK	2.01888e-105	-0.133008	0.084	0.232	4.29395e-101
BTAF1	2.44776e-105	-0.170314	0.195	0.39	5.20614e-101
C1QBP	2.87373e-105	-0.143267	0.133	0.303	6.11213e-101
ACBD3	2.87952e-105	-0.153477	0.174	0.361	6.12444e-101
HNRNPDL	2.98104e-105	-0.223737	0.699	0.818	6.34036e-101
IGFBP7	3.10087e-105	-0.143388	0.136	0.308	6.59525e-101
RANGAP1	4.02381e-105	-0.135142	0.071	0.21	8.55825e-101
TXNRD1	4.08568e-105	-0.168282	0.259	0.475	8.68984e-101
FGD3	4.59669e-105	-0.155834	0.261	0.486	9.77669e-101
DAD1	4.99438e-105	-0.135772	0.22	0.432	1.06225e-100
RHOT1	5.50965e-105	-0.159171	0.236	0.446	1.17185e-100
PPP1R12C	5.56706e-105	-0.151925	0.255	0.476	1.18406e-100
LHFPL2	7.34102e-105	-0.161992	0.119	0.283	1.56136e-100
GRK6	8.02849e-105	-0.167938	0.346	0.588	1.70758e-100
JMJD8	8.08161e-105	-0.106441	0.036	0.15	1.71888e-100
MED28	8.35155e-105	-0.132765	0.122	0.289	1.77629e-100
DNAJA2	8.39387e-105	-0.162433	0.252	0.465	1.78529e-100
VDAC2	1.13727e-104	-0.128578	0.121	0.286	2.41886e-100
AGPAT2	1.33057e-104	-0.142347	0.176	0.365	2.82999e-100
TBC1D23	1.51369e-104	-0.139676	0.117	0.281	3.21946e-100
SAP30BP	1.97059e-104	-0.149516	0.204	0.404	4.19125e-100
PRKAR2B	2.22323e-104	-0.143114	0.072	0.21	4.7286e-100
PSME1	2.36071e-104	-0.230205	0.816	0.875	5.021e-100
SUMF1	2.41055e-104	-0.130344	0.128	0.298	5.12701e-100
TM9SF3	2.67469e-104	-0.164922	0.356	0.603	5.68879e-100
KBTBD2	2.69473e-104	-0.14774	0.153	0.331	5.73143e-100
HNRNPUL2	3.27567e-104	-0.142722	0.18	0.371	6.96703e-100
C15orf57	3.37893e-104	-0.110028	0.04	0.158	7.18665e-100
FOXN2	4.95741e-104	-0.155039	0.194	0.389	1.05439e-99
EIF2S1	5.11247e-104	-0.150059	0.183	0.373	1.08737e-99
NUDT1	5.3101e-104	-0.134585	0.076	0.216	1.12941e-99
SNHG17	5.44238e-104	-0.110696	0.043	0.163	1.15754e-99
APOL3	5.53423e-104	-0.211502	0.244	0.444	1.17708e-99
OAT	5.77483e-104	-0.135198	0.115	0.276	1.22825e-99
ZFR	6.47052e-104	-0.166958	0.271	0.489	1.37622e-99
GADD45A	7.54946e-104	-0.155648	0.087	0.233	1.60569e-99
TXNL1	7.61863e-104	-0.139633	0.179	0.371	1.62041e-99
BTN2A1	7.92842e-104	-0.144802	0.159	0.341	1.6863e-99
TGIF1	8.10737e-104	-0.113968	0.054	0.182	1.72436e-99
MGST2	9.29247e-104	-0.134794	0.121	0.285	1.97642e-99
NABP1	9.53368e-104	-0.167159	0.19	0.383	2.02772e-99
DPH3	9.92173e-104	-0.147167	0.13	0.298	2.11025e-99
GUSB	1.37881e-103	-0.160544	0.257	0.474	2.9326e-99
SUCO	1.4179e-103	-0.153121	0.148	0.324	3.01573e-99
PIN4	1.52104e-103	-0.118736	0.063	0.196	3.23509e-99
NDUFV1	2.07836e-103	-0.142053	0.157	0.336	4.42046e-99
PSMD9	2.227e-103	-0.111664	0.051	0.175	4.7366e-99
KCNE1	2.25357e-103	-0.165546	0.102	0.254	4.79312e-99
ARRDC1	2.58695e-103	-0.118394	0.07	0.207	5.50219e-99
R3HCC1L	2.76517e-103	-0.139925	0.099	0.252	5.88123e-99
STT3B	2.90009e-103	-0.175285	0.316	0.544	6.16821e-99
VMP1	3.12938e-103	-0.25079	0.576	0.739	6.65588e-99
TNFRSF10B	3.30696e-103	-0.144857	0.143	0.316	7.03357e-99
CTSL	3.34592e-103	-0.192732	0.117	0.276	7.11644e-99
VAPA	4.0669e-103	-0.152517	0.334	0.578	8.64989e-99
DUSP6	4.22684e-103	-0.308038	0.901	0.885	8.99008e-99
TSR2	5.60982e-103	-0.129751	0.086	0.233	1.19315e-98
TOX4	5.83613e-103	-0.146891	0.21	0.411	1.24129e-98
STX4	5.91095e-103	-0.150272	0.213	0.414	1.2572e-98
DPP7	7.09811e-103	-0.132565	0.184	0.378	1.5097e-98
ANP32E	7.21217e-103	-0.220923	0.25	0.449	1.53396e-98
VSIG4	9.82937e-103	-0.238422	0.02	0.116	2.09061e-98
BRK1	1.02537e-102	-0.141505	0.302	0.539	2.18086e-98
SLC31A1	1.05535e-102	-0.152123	0.16	0.339	2.24463e-98
TMUB2	1.09653e-102	-0.125798	0.13	0.301	2.3322e-98
P2RX4	1.18763e-102	-0.142403	0.18	0.371	2.52597e-98
RANBP9	1.74495e-102	-0.138234	0.144	0.317	3.71132e-98
CARS2	1.8869e-102	-0.157498	0.267	0.487	4.01325e-98
COPZ1	2.0992e-102	-0.147414	0.274	0.498	4.46478e-98
TIMM17A	2.42555e-102	-0.129614	0.115	0.277	5.15891e-98
ACAP1	3.11578e-102	-0.160423	0.207	0.403	6.62695e-98
MACF1	3.32967e-102	0.23893	0.827	0.643	7.08188e-98
DPY30	3.40175e-102	-0.125003	0.086	0.23	7.23518e-98
HLA-DMA	4.18357e-102	-0.181853	0.196	0.385	8.89803e-98
PGRMC1	4.85386e-102	-0.133761	0.12	0.283	1.03237e-97
SRSF1	4.92764e-102	-0.135845	0.175	0.363	1.04806e-97
TRIM27	5.84723e-102	-0.14634	0.199	0.392	1.24365e-97
INTS10	7.1648e-102	-0.13546	0.16	0.342	1.52388e-97
NFKBIB	9.12631e-102	-0.12409	0.083	0.228	1.94108e-97
NUP214	9.17892e-102	-0.166898	0.346	0.586	1.95226e-97
PRPF31	1.13229e-101	-0.131343	0.108	0.265	2.40827e-97
PIEZO1	1.22624e-101	-0.146362	0.164	0.346	2.6081e-97
RIC8A	1.26935e-101	-0.14005	0.157	0.337	2.69977e-97
C9orf72	1.78012e-101	-0.143572	0.222	0.428	3.78614e-97
DAPK3	1.94569e-101	-0.121229	0.087	0.232	4.13828e-97
MAD2L2	2.39576e-101	-0.123602	0.092	0.24	5.09554e-97
HDDC3	2.81757e-101	-0.096307	0.02	0.116	5.9927e-97
PQBP1	2.86849e-101	-0.131749	0.158	0.338	6.10098e-97
ITGB7	3.02946e-101	-0.194991	0.198	0.384	6.44336e-97
STX18	3.88047e-101	-0.137566	0.103	0.255	8.25337e-97
DHX36	4.14395e-101	-0.161724	0.222	0.423	8.81377e-97
SHKBP1	4.77781e-101	-0.157492	0.375	0.63	1.01619e-96
UIMC1	6.45431e-101	-0.140984	0.153	0.33	1.37277e-96
C1orf122	9.01133e-101	-0.127979	0.106	0.261	1.91662e-96
SAPCD2	9.65851e-101	-0.115964	0.03	0.136	2.05427e-96
CHST11	1.09346e-100	-0.146094	0.19	0.381	2.32567e-96
SPARC	1.2893e-100	-0.146736	0.065	0.196	2.74221e-96
PPP1CC	1.49436e-100	-0.168316	0.378	0.623	3.17836e-96
SUGP2	1.53329e-100	-0.138119	0.146	0.32	3.26115e-96
MLTK	1.78696e-100	-0.159748	0.185	0.372	3.80068e-96
CHURC1	1.803e-100	-0.153542	0.164	0.341	3.83481e-96
VDAC1	1.87936e-100	-0.138541	0.157	0.332	3.9972e-96
FAM173A	1.9001e-100	-0.120723	0.083	0.226	4.04133e-96
SLIRP	2.06961e-100	-0.122435	0.116	0.275	4.40185e-96
SLC12A7	2.08727e-100	-0.131902	0.126	0.29	4.43942e-96
C9orf89	2.50964e-100	-0.13908	0.208	0.406	5.33775e-96
CHMP4A	2.74964e-100	-0.0998022	0.029	0.133	5.84821e-96
DHX30	3.247e-100	-0.132203	0.115	0.273	6.90604e-96
GSDMD	3.31872e-100	-0.147652	0.224	0.428	7.05859e-96
SIVA1	3.84632e-100	-0.130838	0.112	0.269	8.18075e-96
C1orf85	4.04645e-100	-0.0967107	0.031	0.137	8.6064e-96
ATXN7L3	4.0911e-100	-0.161004	0.248	0.455	8.70135e-96
CLN3	4.11483e-100	0.131743	0.11	0.013	8.75183e-96
NDUFB3	5.27752e-100	-0.14099	0.179	0.363	1.12248e-95
ANXA7	5.44781e-100	-0.146953	0.269	0.486	1.15869e-95
OSTC	5.751e-100	-0.125714	0.123	0.285	1.22318e-95
TIMMDC1	6.44693e-100	-0.133241	0.155	0.332	1.3712e-95
ZNF787	7.25579e-100	-0.117531	0.078	0.217	1.54323e-95
MAGOH	8.9804e-100	-0.122329	0.091	0.237	1.91004e-95
GMPR2	9.03615e-100	-0.135792	0.164	0.345	1.9219e-95
BIN3	1.11646e-99	-0.0980374	0.028	0.131	2.3746e-95
C16orf72	1.12839e-99	-0.133526	0.161	0.339	2.39996e-95
CHMP3	1.33377e-99	-0.14632	0.214	0.413	2.83679e-95
SLC35A1	1.59713e-99	-0.121343	0.091	0.238	3.39693e-95
UBAC1	1.63568e-99	-0.138585	0.191	0.383	3.47892e-95
RNF187	1.72743e-99	-0.131089	0.134	0.301	3.67407e-95
TBK1	1.79956e-99	-0.145291	0.155	0.328	3.82748e-95
IRAK3	2.00503e-99	-0.219766	0.532	0.719	4.26451e-95
CCDC109B	2.04157e-99	-0.134106	0.243	0.453	4.34222e-95
ANKRD22	2.07752e-99	-0.162143	0.047	0.165	4.41867e-95
IFFO2	2.0852e-99	-0.153768	0.086	0.226	4.43502e-95
PSMB2	2.15114e-99	-0.131439	0.192	0.383	4.57526e-95
SLC44A1	2.35358e-99	-0.163073	0.189	0.373	5.00583e-95
VDAC3	2.41865e-99	-0.136895	0.172	0.354	5.14422e-95
C14orf119	2.98747e-99	-0.129905	0.116	0.273	6.35405e-95
AHCY	3.20566e-99	-0.126046	0.091	0.236	6.81811e-95
PSMD4	3.41585e-99	-0.159039	0.362	0.605	7.26518e-95
PPBP	3.87062e-99	-0.130506	0.036	0.145	8.23243e-95
LAMTOR3	4.27401e-99	-0.122807	0.086	0.228	9.09039e-95
XBP1	4.31623e-99	-0.169289	0.305	0.528	9.18019e-95
IRF8	4.34344e-99	-0.1612	0.284	0.503	9.23807e-95
ZNF267	4.38027e-99	-0.141536	0.132	0.296	9.3164e-95
SRSF5	5.02952e-99	-0.188042	0.833	0.893	1.06973e-94
TMEM167A	5.26965e-99	-0.183341	0.408	0.641	1.1208e-94
PDCD6	6.07494e-99	-0.135779	0.205	0.401	1.29208e-94
HDAC1	7.21138e-99	-0.148279	0.272	0.488	1.53379e-94
EIF5AL1	7.96607e-99	0.125841	0.117	0.018	1.6943e-94
RSRC1	8.08498e-99	-0.134087	0.114	0.271	1.71959e-94
RNF166	8.96107e-99	-0.131352	0.166	0.346	1.90593e-94
DNAJC2	1.23661e-98	-0.145762	0.14	0.308	2.63014e-94
PDZD8	1.31743e-98	-0.134819	0.117	0.276	2.80204e-94
FOXO3	1.57449e-98	-0.167376	0.206	0.398	3.34877e-94
COX7A2L	1.70204e-98	-0.13354	0.218	0.419	3.62006e-94
ARHGAP27	1.7608e-98	-0.154073	0.256	0.467	3.74504e-94
IDH2	1.85623e-98	-0.148715	0.222	0.422	3.94802e-94
SPCS3	1.88446e-98	-0.159752	0.375	0.621	4.00805e-94
SUCLG1	2.00663e-98	-0.135138	0.198	0.391	4.2679e-94
ELL2	2.5556e-98	-0.142027	0.065	0.194	5.43551e-94
DHX38	2.65949e-98	-0.140109	0.151	0.324	5.65646e-94
MDM2	2.91475e-98	-0.169737	0.214	0.41	6.19939e-94
LMAN2	3.53668e-98	-0.15802	0.391	0.639	7.52217e-94
CECR5	3.7857e-98	-0.11694	0.074	0.209	8.05181e-94
NASP	4.89842e-98	-0.151979	0.158	0.333	1.04185e-93
GLRX5	6.30171e-98	-0.122413	0.106	0.259	1.34031e-93
ARFGEF2	7.36727e-98	-0.156565	0.171	0.348	1.56695e-93
DECR1	7.70017e-98	-0.148548	0.23	0.429	1.63775e-93
EDEM1	9.08431e-98	-0.135298	0.17	0.351	1.93214e-93
SNX20	9.83473e-98	-0.145467	0.201	0.391	2.09175e-93
CCDC22	1.01584e-97	-0.117947	0.062	0.19	2.1606e-93
SNHG1	1.28058e-97	-0.123466	0.065	0.193	2.72366e-93
AP3S1	1.4235e-97	-0.12518	0.144	0.315	3.02765e-93
STAB1	1.42372e-97	-0.219184	0.468	0.681	3.02811e-93
ZFP91	1.50389e-97	-0.139775	0.204	0.397	3.19863e-93
UVRAG	1.7087e-97	-0.147503	0.175	0.357	3.63423e-93
MRPL12	1.89932e-97	-0.0987778	0.034	0.142	4.03966e-93
RAB13	1.94388e-97	-0.128276	0.093	0.238	4.13445e-93
IL1RAP	2.11957e-97	-0.130857	0.074	0.208	4.50811e-93
BTG1	2.13279e-97	-0.251111	0.878	0.898	4.53623e-93
PNN	2.264e-97	-0.175789	0.32	0.543	4.81531e-93
RHBDF2	2.55216e-97	-0.139818	0.162	0.337	5.42819e-93
COMT	2.73027e-97	-0.14715	0.256	0.466	5.80701e-93
SAT2	2.95612e-97	-0.142862	0.221	0.42	6.28736e-93
LIPA	2.96797e-97	-0.201197	0.268	0.467	6.31258e-93
HCCS	3.01515e-97	-0.11334	0.062	0.189	6.41293e-93
THOC6	3.60385e-97	-0.101896	0.04	0.152	7.66503e-93
AQP9	4.00367e-97	-0.198561	0.352	0.575	8.51541e-93
HSPE1	5.11578e-97	-0.113782	0.066	0.195	1.08808e-92
RNF13	5.13508e-97	-0.147036	0.282	0.502	1.09218e-92
PCF11	5.20698e-97	-0.176865	0.282	0.494	1.10747e-92
PSMB8	8.55948e-97	-0.22571	0.682	0.804	1.82052e-92
MAP2K2	9.1451e-97	-0.129016	0.162	0.338	1.94507e-92
DARS	9.95896e-97	-0.128107	0.144	0.313	2.11817e-92
C17orf89	1.36829e-96	-0.123493	0.092	0.236	2.91021e-92
UBA1	1.37517e-96	-0.147622	0.257	0.466	2.92484e-92
ELOF1	1.45742e-96	-0.119725	0.098	0.246	3.09979e-92
QTRTD1	1.46663e-96	-0.127115	0.087	0.228	3.11937e-92
RNH1	1.51332e-96	-0.187022	0.499	0.712	3.21869e-92
GNL3	1.77961e-96	-0.140543	0.129	0.288	3.78504e-92
MPDU1	2.23838e-96	-0.125583	0.106	0.257	4.76081e-92
FBXO34	3.08952e-96	-0.134747	0.097	0.243	6.5711e-92
ZFAND2A	3.29401e-96	-0.121598	0.08	0.216	7.00604e-92
KHDRBS1	3.73646e-96	-0.155761	0.375	0.619	7.94707e-92
PCK2	3.88282e-96	-0.124984	0.08	0.217	8.25836e-92
SNRK	4.7386e-96	-0.149304	0.206	0.397	1.00785e-91
MBP	4.98621e-96	-0.158734	0.298	0.518	1.06052e-91
C21orf59	4.99419e-96	-0.105183	0.049	0.167	1.06222e-91
FAM53B	5.50701e-96	-0.141092	0.15	0.32	1.17128e-91
PFKP	5.96952e-96	-0.146591	0.161	0.336	1.26966e-91
EMC3	5.98557e-96	-0.126634	0.162	0.339	1.27307e-91
GPX4	6.19888e-96	-0.139865	0.24	0.444	1.31844e-91
DDOST	6.31127e-96	-0.139094	0.259	0.47	1.34234e-91
SNRNP70	6.73876e-96	-0.139399	0.258	0.473	1.43327e-91
ZNRD1	7.17714e-96	-0.107929	0.054	0.175	1.52651e-91
LFNG	8.42123e-96	-0.127127	0.111	0.264	1.79111e-91
PTK2B	9.8619e-96	-0.171547	0.44	0.674	2.09753e-91
GIT2	9.91046e-96	-0.14114	0.211	0.401	2.10785e-91
ST14	9.98231e-96	-0.146734	0.178	0.359	2.12314e-91
NFKB1	1.01852e-95	-0.15289	0.292	0.511	2.16629e-91
EIF4E2	1.05532e-95	-0.134175	0.253	0.465	2.24456e-91
FBXO18	1.20544e-95	-0.141279	0.138	0.301	2.56386e-91
ZSWIM7	1.24705e-95	-0.116161	0.094	0.239	2.65235e-91
LAMC1	1.40045e-95	-0.102406	0.025	0.122	2.97862e-91
CAPN1	1.49466e-95	-0.138268	0.257	0.469	3.179e-91
TRIM8	1.5367e-95	-0.145532	0.24	0.441	3.26841e-91
TP53I3	1.63101e-95	-0.123322	0.068	0.196	3.46899e-91
TNFRSF10A	1.70326e-95	-0.12155	0.071	0.202	3.62267e-91
PSMD11	1.84822e-95	-0.134286	0.189	0.375	3.93098e-91
SDC4	2.43075e-95	-0.110052	0.03	0.132	5.16996e-91
GLO1	2.59312e-95	-0.132592	0.141	0.306	5.51531e-91
PCYT1A	2.93908e-95	-0.160183	0.256	0.46	6.25113e-91
TRAPPC4	3.15073e-95	-0.115145	0.07	0.201	6.70129e-91
KLF16	3.54794e-95	-0.0952441	0.028	0.128	7.54611e-91
SEC61G	3.93676e-95	-0.125226	0.119	0.274	8.3731e-91
PGAM1	4.00351e-95	-0.143616	0.254	0.46	8.51507e-91
PPP1R35	4.26875e-95	-0.0881835	0.018	0.108	9.0792e-91
SPG21	4.57512e-95	-0.137858	0.343	0.584	9.73082e-91
MAPRE1	4.88842e-95	-0.136668	0.325	0.561	1.03972e-90
IGHM	5.68231e-95	-0.323461	0.186	0.348	1.20857e-90
SUMO1	5.83611e-95	-0.122972	0.134	0.296	1.24128e-90
COPE	5.84512e-95	-0.133043	0.165	0.339	1.2432e-90
CWF19L1	6.49645e-95	-0.124138	0.098	0.244	1.38173e-90
CELF1	6.71528e-95	-0.157481	0.237	0.436	1.42827e-90
ERICH1	7.23615e-95	-0.157268	0.271	0.482	1.53906e-90
LTA4H	7.6136e-95	-0.25309	0.836	0.865	1.61934e-90
DHPS	7.80754e-95	-0.104114	0.048	0.163	1.66058e-90
MRPL27	9.78457e-95	-0.114174	0.085	0.225	2.08108e-90
JKAMP	9.98683e-95	-0.117703	0.095	0.238	2.1241e-90
TMEM50A	1.42651e-94	-0.145953	0.315	0.542	3.03403e-90
CLEC2B	1.48814e-94	-0.139692	0.182	0.363	3.16512e-90
SLMAP	1.77097e-94	-0.145702	0.21	0.4	3.76668e-90
BFAR	2.05201e-94	-0.126173	0.124	0.282	4.36442e-90
STRN3	2.0607e-94	-0.12679	0.097	0.241	4.38291e-90
TNIP2	2.12872e-94	-0.133994	0.17	0.348	4.52758e-90
MED10	2.13387e-94	-0.129153	0.138	0.302	4.53852e-90
CXorf38	2.26154e-94	-0.127589	0.122	0.279	4.81006e-90
NEU1	4.20685e-94	-0.142878	0.153	0.32	8.94756e-90
PSENEN	4.59914e-94	-0.120117	0.085	0.222	9.78192e-90
ASGR2	4.72241e-94	-0.220027	0.354	0.572	1.00441e-89
DGUOK	5.36334e-94	-0.1151	0.089	0.229	1.14073e-89
PRCP	5.64186e-94	-0.140152	0.206	0.395	1.19997e-89
CCAR1	6.02294e-94	-0.151058	0.266	0.476	1.28102e-89
EIF2AK1	6.32907e-94	-0.156952	0.311	0.53	1.34613e-89
POLR2F	7.02213e-94	-0.125835	0.158	0.33	1.49354e-89
EIF2S3L	7.606e-94	0.131148	0.119	0.021	1.61772e-89
NDUFS3	9.08651e-94	-0.126489	0.16	0.333	1.93261e-89
VKORC1	9.42981e-94	-0.115175	0.084	0.221	2.00563e-89
BEST1	9.44215e-94	-0.123832	0.092	0.233	2.00825e-89
LIMS1	1.10475e-93	-0.183615	0.411	0.638	2.34969e-89
PACSIN2	1.28208e-93	-0.149587	0.259	0.465	2.72686e-89
MRPL22	1.29781e-93	-0.113188	0.079	0.213	2.76031e-89
UHRF2	1.30433e-93	-0.121057	0.091	0.233	2.77419e-89
SESTD1	1.68322e-93	-0.130749	0.136	0.298	3.58004e-89
C7orf55-LUC7L2	1.90447e-93	-0.118381	0.099	0.244	4.05061e-89
SRSF9	2.01407e-93	-0.141965	0.303	0.523	4.28372e-89
BAK1	2.28433e-93	-0.0955889	0.039	0.147	4.85853e-89
NME1-NME2	2.55271e-93	-0.0845827	0.017	0.104	5.42937e-89
URM1	2.9576e-93	-0.117199	0.09	0.23	6.29052e-89
TM2D3	3.21707e-93	-0.113453	0.066	0.191	6.84239e-89
DNM1L	3.8084e-93	-0.14723	0.206	0.39	8.10008e-89
CAMK1	4.20321e-93	-0.100684	0.032	0.135	8.93982e-89
APRT	4.65675e-93	-0.128877	0.23	0.43	9.90444e-89
MRPL24	6.02355e-93	-0.109113	0.065	0.191	1.28115e-88
SNRNP25	6.80905e-93	-0.115583	0.056	0.175	1.44822e-88
ANP32B	7.17093e-93	-0.203301	0.55	0.728	1.52518e-88
COX6B1	8.13864e-93	-0.138078	0.361	0.607	1.73101e-88
STX5	9.04275e-93	-0.114915	0.108	0.258	1.9233e-88
INO80E	9.11407e-93	-0.0859285	0.021	0.111	1.93847e-88
ANXA2R	9.16684e-93	-0.104899	0.043	0.154	1.94969e-88
PHACTR1	9.55503e-93	-0.117322	0.064	0.188	2.03226e-88
CD93	1.18032e-92	0.250305	0.829	0.704	2.51042e-88
ARIH2	1.28819e-92	-0.137002	0.186	0.368	2.73986e-88
NUMA1	1.29826e-92	-0.152615	0.209	0.397	2.76126e-88
NDUFS1	1.50901e-92	-0.139835	0.197	0.382	3.20952e-88
EEF2	1.58299e-92	-0.162889	0.985	0.987	3.36687e-88
CCDC174	1.63113e-92	-0.116568	0.07	0.198	3.46926e-88
PTS	1.73596e-92	-0.0999574	0.046	0.158	3.69222e-88
TIMM10	1.98691e-92	-0.106639	0.049	0.164	4.22595e-88
TBRG1	2.09718e-92	-0.122867	0.146	0.314	4.4605e-88
DNAJC3	2.18445e-92	-0.163532	0.35	0.574	4.6461e-88
VCAN-AS1	2.18983e-92	-0.0874028	0.019	0.107	4.65755e-88
RBBP4	2.26461e-92	-0.130644	0.131	0.289	4.8166e-88
HCP5	2.28241e-92	-0.117759	0.076	0.207	4.85446e-88
C14orf166	2.54887e-92	-0.117316	0.168	0.343	5.4212e-88
GOLGA7	2.75342e-92	-0.130955	0.206	0.396	5.85626e-88
NCOA7	2.87238e-92	-0.146923	0.171	0.344	6.10927e-88
APTX	3.17961e-92	-0.113625	0.066	0.191	6.76271e-88
TTC14	3.78137e-92	-0.128636	0.114	0.264	8.04259e-88
CLINT1	3.83826e-92	-0.169728	0.307	0.516	8.16359e-88
DYNLL1	5.02932e-92	-0.137436	0.275	0.487	1.06969e-87
NLRC5	5.08174e-92	-0.143515	0.235	0.431	1.08084e-87
HAGH	5.77139e-92	-0.111726	0.074	0.204	1.22752e-87
AKT2	5.84768e-92	-0.118523	0.144	0.311	1.24374e-87
TRPV2	5.90192e-92	-0.126627	0.135	0.296	1.25528e-87
NDUFA10	6.32093e-92	-0.133012	0.226	0.423	1.3444e-87
UQCR10	6.59917e-92	-0.123781	0.256	0.467	1.40358e-87
PSMC4	6.81063e-92	-0.123114	0.131	0.29	1.44855e-87
MAP3K7CL	7.67621e-92	-0.159076	0.074	0.202	1.63265e-87
DDB1	7.82897e-92	-0.143826	0.255	0.459	1.66514e-87
PTAFR	7.89255e-92	-0.248756	0.822	0.852	1.67867e-87
TAP1	8.92976e-92	-0.198192	0.303	0.506	1.89927e-87
MSRB2	9.12801e-92	-0.120184	0.108	0.256	1.94144e-87
TBCD	9.96175e-92	-0.120564	0.086	0.222	2.11876e-87
RBM39	1.19603e-91	-0.17907	0.906	0.936	2.54384e-87
ZBTB8OS	1.29585e-91	-0.115655	0.11	0.26	2.75614e-87
B9D2	1.37267e-91	-0.106194	0.048	0.161	2.91954e-87
MFSD1	1.37923e-91	-0.178211	0.522	0.722	2.93348e-87
WDR74	1.75938e-91	-0.102223	0.042	0.151	3.74203e-87
ZCCHC6	1.87421e-91	-0.212209	0.413	0.625	3.98625e-87
NACA2	2.33359e-91	0.142209	0.145	0.037	4.96332e-87
TEX2	2.54597e-91	-0.122268	0.09	0.228	5.41503e-87
RNF41	2.82677e-91	-0.12356	0.11	0.257	6.01225e-87
SLC36A4	2.94191e-91	-0.126245	0.141	0.303	6.25716e-87
TTC1	3.17185e-91	-0.136509	0.216	0.406	6.74622e-87
RHOT2	3.41154e-91	-0.122596	0.115	0.265	7.256e-87
ARL3	3.71818e-91	-0.116946	0.072	0.199	7.9082e-87
C3orf58	4.30541e-91	-0.150341	0.161	0.326	9.15717e-87
BLMH	4.36293e-91	-0.127628	0.111	0.258	9.27952e-87
ADIPOR2	4.75459e-91	-0.14323	0.206	0.391	1.01125e-86
TBRG4	6.16449e-91	-0.104825	0.055	0.172	1.31113e-86
FBXO33	7.70484e-91	-0.12642	0.144	0.309	1.63874e-86
ZNF511	9.91693e-91	-0.1185	0.109	0.256	2.10923e-86
RHOC	1.03106e-90	-0.130536	0.076	0.205	2.19295e-86
PNKD	1.04405e-90	-0.127546	0.181	0.358	2.22058e-86
GCNT1	1.28425e-90	-0.137834	0.119	0.27	2.73147e-86
EIF2B4	1.31791e-90	-0.120861	0.112	0.262	2.80306e-86
TSPYL2	1.33308e-90	-0.11153	0.045	0.155	2.83533e-86
TOR4A	1.39866e-90	-0.112184	0.097	0.239	2.97482e-86
BUB3	1.64531e-90	-0.133854	0.161	0.329	3.4994e-86
CHCHD1	1.75755e-90	-0.117952	0.147	0.311	3.73814e-86
ADAM15	1.81574e-90	-0.113623	0.105	0.25	3.86189e-86
CSNK1D	2.11209e-90	-0.140508	0.279	0.488	4.4922e-86
DYNLT1	2.17547e-90	-0.135939	0.172	0.344	4.62701e-86
EIF2B5	2.36396e-90	-0.128454	0.124	0.277	5.0279e-86
ALDOA	2.4071e-90	-0.161323	0.977	0.982	5.11967e-86
SART3	2.61456e-90	-0.137073	0.12	0.269	5.5609e-86
MED8	2.62009e-90	-0.119311	0.113	0.261	5.57266e-86
RSL24D1	2.74088e-90	-0.128817	0.21	0.399	5.82959e-86
JUNB	2.75788e-90	-0.286977	0.81	0.849	5.86572e-86
CRELD2	2.79693e-90	-0.138315	0.12	0.27	5.94878e-86
SDPR	2.91269e-90	-0.117746	0.046	0.157	6.19499e-86
SSR3	3.51171e-90	-0.147935	0.299	0.513	7.46905e-86
ALDH16A1	3.5903e-90	-0.106401	0.059	0.179	7.63621e-86
SMARCD2	3.66968e-90	-0.120607	0.132	0.288	7.80504e-86
DENND6A	3.96238e-90	-0.116884	0.105	0.25	8.42759e-86
RNF220	3.9714e-90	-0.118649	0.139	0.299	8.44676e-86
NR4A1	4.23863e-90	-0.114361	0.038	0.142	9.01514e-86
CEP63	4.55125e-90	-0.140164	0.142	0.302	9.68006e-86
MFF	4.57034e-90	-0.125428	0.163	0.332	9.72066e-86
PTGS1	4.57431e-90	-0.120765	0.053	0.167	9.72911e-86
RAD23A	4.66753e-90	-0.129565	0.248	0.448	9.92737e-86
VPS26A	4.72517e-90	-0.138741	0.25	0.448	1.005e-85
OGFR	6.94618e-90	-0.133008	0.251	0.454	1.47738e-85
AIM1	7.0851e-90	-0.16445	0.324	0.54	1.50693e-85
SLC35D2	7.30289e-90	-0.111026	0.067	0.191	1.55325e-85
POLR2L	7.75619e-90	-0.13041	0.172	0.343	1.64966e-85
EFCAB2	7.95665e-90	-0.088454	0.025	0.119	1.6923e-85
SAR1A	8.08639e-90	-0.146616	0.283	0.491	1.71989e-85
DHX9	8.1843e-90	-0.160286	0.342	0.564	1.74072e-85
TINF2	8.82165e-90	-0.132047	0.178	0.354	1.87628e-85
C11orf83	8.88812e-90	-0.106945	0.056	0.173	1.89041e-85
FKBP8	1.09122e-89	-0.111664	0.104	0.248	2.32091e-85
MLF2	1.26613e-89	-0.117932	0.144	0.306	2.69293e-85
KEAP1	1.26869e-89	-0.122262	0.104	0.248	2.69838e-85
MRPS16	1.30005e-89	-0.11648	0.102	0.243	2.76507e-85
SLK	1.32386e-89	-0.168458	0.326	0.539	2.81572e-85
CFDP1	1.44692e-89	-0.119505	0.096	0.235	3.07745e-85
TMEM208	1.4906e-89	-0.119502	0.137	0.296	3.17036e-85
RSU1	1.66847e-89	-0.12674	0.232	0.428	3.54866e-85
FAF2	2.13856e-89	-0.12324	0.131	0.287	4.54851e-85
OCIAD1	2.1645e-89	-0.128095	0.19	0.368	4.60368e-85
PTPN11	2.76271e-89	-0.163608	0.285	0.486	5.87601e-85
KCTD5	3.08073e-89	-0.098394	0.048	0.159	6.55241e-85
SNAPIN	3.46955e-89	-0.107337	0.087	0.223	7.37939e-85
SNX4	3.49172e-89	-0.12356	0.119	0.27	7.42653e-85
STRA13	3.6671e-89	-0.109104	0.07	0.195	7.79956e-85
TNKS2	3.83067e-89	-0.154847	0.251	0.448	8.14746e-85
TMEM165	3.86485e-89	-0.131827	0.246	0.445	8.22016e-85
RIOK1	4.17218e-89	-0.118883	0.088	0.222	8.8738e-85
CGGBP1	5.09582e-89	-0.128781	0.262	0.467	1.08383e-84
FLOT2	5.33201e-89	-0.149044	0.345	0.575	1.13406e-84
NSMCE2	5.55112e-89	-0.10748	0.064	0.186	1.18067e-84
PHYKPL	6.06785e-89	-0.128721	0.169	0.339	1.29057e-84
TMCO1	6.67359e-89	-0.12534	0.21	0.397	1.41941e-84
COX16	6.69061e-89	-0.106314	0.072	0.198	1.42303e-84
KLHL21	7.68783e-89	-0.0998267	0.035	0.136	1.63512e-84
EIF5B	7.76093e-89	-0.167371	0.254	0.446	1.65067e-84
PABPC4	7.8297e-89	-0.1489	0.224	0.41	1.6653e-84
RNMT	7.91057e-89	-0.122271	0.119	0.269	1.6825e-84
IST1	7.9919e-89	-0.131482	0.268	0.474	1.6998e-84
GSN	8.18783e-89	-0.138154	0.201	0.382	1.74147e-84
PLRG1	8.82336e-89	-0.11617	0.086	0.219	1.87664e-84
ALAD	8.90647e-89	-0.136289	0.172	0.343	1.89432e-84
BCL3	1.03279e-88	-0.12962	0.126	0.278	2.19663e-84
NDUFS2	1.12875e-88	-0.121736	0.214	0.405	2.40074e-84
KSR1	1.18806e-88	-0.11984	0.11	0.256	2.52689e-84
C16orf91	1.19346e-88	-0.0898295	0.03	0.127	2.53837e-84
TMED7	1.23161e-88	-0.114858	0.134	0.291	2.61952e-84
AMPH	1.38611e-88	-0.109083	0.017	0.101	2.94811e-84
AKAP8L	1.40908e-88	-0.120547	0.133	0.288	2.99698e-84
ZDHHC6	1.7693e-88	-0.108668	0.108	0.255	3.76313e-84
USP48	2.43318e-88	-0.146473	0.293	0.504	5.17513e-84
ECHDC1	2.52935e-88	-0.125217	0.211	0.399	5.37967e-84
NT5C	2.59096e-88	-0.111426	0.06	0.178	5.51071e-84
CPNE8	3.19692e-88	-0.119363	0.091	0.226	6.79952e-84
VPS16	3.21006e-88	-0.117235	0.115	0.263	6.82748e-84
MRPS14	3.21585e-88	-0.108612	0.071	0.196	6.8398e-84
HMGCS1	3.22574e-88	-0.121779	0.077	0.204	6.86082e-84
SLC8A1	3.28627e-88	-0.167256	0.286	0.488	6.98956e-84
SYNGR2	3.90023e-88	-0.147271	0.387	0.623	8.29541e-84
ITGAE	4.0877e-88	-0.112073	0.076	0.202	8.69412e-84
KRAS	5.26887e-88	-0.137202	0.222	0.412	1.12064e-83
KPNA1	5.38647e-88	-0.12249	0.107	0.249	1.14565e-83
EIF2AK3	6.03758e-88	-0.103446	0.044	0.15	1.28413e-83
E4F1	6.99691e-88	-0.1009	0.045	0.152	1.48817e-83
CSF2RA	7.01916e-88	-0.131694	0.218	0.406	1.4929e-83
GHITM	7.28439e-88	-0.167541	0.533	0.741	1.54932e-83
ACTA1	7.7551e-88	0.114676	0.104	0.016	1.64943e-83
AHSA2	8.73432e-88	-0.128768	0.116	0.263	1.8577e-83
DTNBP1	9.02506e-88	-0.121292	0.118	0.267	1.91954e-83
ARHGAP19	9.24144e-88	-0.116696	0.083	0.215	1.96556e-83
PSMB10	9.91835e-88	-0.0976343	0.046	0.154	2.10953e-83
TSPAN17	1.06522e-87	-0.116435	0.093	0.23	2.26561e-83
PFKL	1.08351e-87	-0.125011	0.218	0.408	2.30452e-83
TUBA4A	1.25035e-87	-0.131577	0.138	0.294	2.65937e-83
PSEN1	1.25968e-87	-0.135429	0.281	0.491	2.67921e-83
SLC2A6	1.26433e-87	-0.148839	0.189	0.364	2.6891e-83
SLC25A24	1.34053e-87	-0.137323	0.19	0.365	2.85116e-83
THBD	1.36737e-87	-0.170521	0.089	0.221	2.90826e-83
RHEB	1.57397e-87	-0.116016	0.108	0.251	3.34767e-83
NUDT18	1.77591e-87	-0.0976689	0.041	0.146	3.77718e-83
ETHE1	2.0555e-87	-0.118843	0.122	0.271	4.37184e-83
TBXAS1	2.11191e-87	-0.148532	0.385	0.622	4.49182e-83
VRK2	2.45108e-87	-0.111382	0.082	0.213	5.21321e-83
NUFIP1	2.57456e-87	-0.0877599	0.021	0.107	5.47583e-83
EMG1	2.75072e-87	-0.107606	0.061	0.18	5.85051e-83
TMEM43	2.95675e-87	-0.133264	0.199	0.378	6.2887e-83
CDKN2D	3.07275e-87	-0.145463	0.309	0.522	6.53543e-83
METTL7A	3.2431e-87	-0.173046	0.343	0.557	6.89774e-83
WDR45B	3.39947e-87	-0.122157	0.136	0.293	7.23032e-83
PSMB3	3.546e-87	-0.135995	0.343	0.569	7.54199e-83
IK	3.60126e-87	-0.139977	0.349	0.577	7.65953e-83
DDRGK1	3.69217e-87	-0.120925	0.138	0.295	7.85287e-83
RBBP7	3.94758e-87	-0.131507	0.152	0.312	8.39612e-83
GADD45B	4.50225e-87	-0.275879	0.553	0.698	9.57583e-83
PPHLN1	4.56485e-87	-0.116678	0.124	0.275	9.70899e-83
AATF	4.97309e-87	-0.127119	0.235	0.429	1.05773e-82
SSR4	5.0363e-87	-0.12844	0.364	0.603	1.07117e-82
RUFY1	5.2929e-87	-0.135563	0.236	0.429	1.12575e-82
UBE2N	5.59867e-87	-0.117815	0.184	0.359	1.19078e-82
SLC39A1	6.37749e-87	-0.115949	0.112	0.257	1.35643e-82
CDKN1B	6.53811e-87	-0.162799	0.22	0.399	1.39059e-82
PLCL2	7.13208e-87	-0.132165	0.193	0.371	1.51692e-82
EIF4H	7.33612e-87	-0.130615	0.312	0.532	1.56032e-82
POLDIP3	7.56046e-87	-0.117194	0.178	0.352	1.60804e-82
MAP3K3	7.71096e-87	-0.141484	0.348	0.578	1.64004e-82
PTMA	7.80429e-87	0.242823	0.861	0.764	1.6599e-82
NCK2	8.61042e-87	-0.108124	0.073	0.197	1.83135e-82
LTBR	1.32524e-86	-0.128594	0.279	0.486	2.81866e-82
HDHD1	1.43506e-86	-0.112516	0.077	0.204	3.05222e-82
PLOD3	1.44393e-86	-0.109041	0.098	0.236	3.07109e-82
ATG16L2	1.5025e-86	-0.139626	0.244	0.44	3.19567e-82
RNF115	1.72994e-86	-0.111977	0.094	0.229	3.67941e-82
ADSS	1.94606e-86	-0.129345	0.183	0.355	4.13907e-82
UBE2M	1.98624e-86	-0.103559	0.062	0.18	4.22453e-82
TAF8	1.99526e-86	-0.10862	0.073	0.197	4.24372e-82
POLDIP2	1.99808e-86	-0.114238	0.121	0.269	4.24971e-82
PRPF6	2.13076e-86	-0.13464	0.217	0.403	4.53192e-82
CSTB	2.41014e-86	-0.139555	0.27	0.472	5.12612e-82
RGP1	2.64679e-86	-0.0952413	0.038	0.14	5.62946e-82
SDF2	2.84039e-86	-0.116732	0.115	0.261	6.04123e-82
NR4A3	2.89915e-86	-0.0917299	0.018	0.102	6.1662e-82
TMEM14B	2.98093e-86	-0.11107	0.105	0.245	6.34013e-82
PISD	3.31152e-86	-0.118213	0.14	0.297	7.04326e-82
B4GALT5	3.60384e-86	-0.166049	0.335	0.547	7.66501e-82
ZFAND3	3.71816e-86	-0.116566	0.169	0.339	7.90815e-82
GALK1	4.17165e-86	-0.112788	0.113	0.259	8.87268e-82
DDX6	4.50169e-86	-0.147972	0.255	0.449	9.57464e-82
PSD4	5.12365e-86	-0.125925	0.19	0.366	1.08975e-81
SLC39A8	5.43316e-86	-0.188901	0.135	0.285	1.15558e-81
GSPT1	5.89393e-86	-0.140879	0.236	0.427	1.25358e-81
EIF1B	6.73341e-86	-0.110188	0.099	0.237	1.43213e-81
TSPYL1	7.07891e-86	-0.114611	0.086	0.217	1.50561e-81
VNN3	7.64837e-86	-0.125444	0.057	0.17	1.62673e-81
RASA1	8.14072e-86	-0.116777	0.098	0.235	1.73145e-81
YBX3	8.1476e-86	-0.162758	0.351	0.569	1.73291e-81
ACP1	8.88298e-86	-0.117282	0.135	0.288	1.88932e-81
RBM38	9.49622e-86	-0.119353	0.12	0.267	2.01975e-81
DNAJB11	9.56107e-86	-0.144157	0.244	0.435	2.03354e-81
GALK2	9.96224e-86	-0.0897913	0.027	0.119	2.11887e-81
MAN1B1	9.99585e-86	-0.113598	0.089	0.22	2.12602e-81
CEBPZ	1.10136e-85	-0.129344	0.133	0.285	2.34248e-81
MBD3	1.19685e-85	-0.10936	0.084	0.213	2.54559e-81
GADD45G	1.2983e-85	-0.112569	0.035	0.134	2.76136e-81
BCCIP	1.58875e-85	-0.117338	0.136	0.29	3.37911e-81
NDUFB1	1.59875e-85	-0.11768	0.173	0.343	3.40038e-81
LTB4R	1.80456e-85	-0.133028	0.201	0.38	3.83811e-81
FRMD8	1.81887e-85	-0.10361	0.082	0.21	3.86855e-81
TMEM101	1.92117e-85	-0.109784	0.083	0.212	4.08613e-81
DEF8	1.94983e-85	-0.124693	0.154	0.316	4.14709e-81
CAPZA2	2.0048e-85	-0.143682	0.389	0.624	4.26401e-81
NRBF2	2.11428e-85	-0.110888	0.109	0.252	4.49687e-81
MRPL4	2.17566e-85	-0.086447	0.028	0.121	4.6274e-81
MRPL37	2.47895e-85	-0.108748	0.09	0.222	5.27247e-81
DPP3	2.83488e-85	-0.109603	0.082	0.21	6.0295e-81
TMTC1	2.93937e-85	-0.0953812	0.04	0.142	6.25175e-81
RARRES3	3.20765e-85	-0.151276	0.127	0.273	6.82235e-81
FAM168B	3.62591e-85	-0.131263	0.14	0.293	7.71195e-81
PSMD6	4.05705e-85	-0.116659	0.192	0.369	8.62895e-81
VAMP3	4.16877e-85	-0.131524	0.271	0.471	8.86656e-81
EXT1	4.31721e-85	-0.110725	0.089	0.222	9.18227e-81
TBC1D2	4.44958e-85	-0.124641	0.154	0.314	9.46381e-81
RBM23	4.55352e-85	-0.125259	0.22	0.407	9.68488e-81
PGP	4.68686e-85	-0.112736	0.098	0.235	9.96849e-81
DFFA	4.76214e-85	-0.11769	0.099	0.234	1.01286e-80
UQCRC1	4.80272e-85	-0.156153	0.45	0.674	1.02149e-80
PTBP2	4.88534e-85	-0.10327	0.041	0.143	1.03906e-80
ARL8A	4.93927e-85	-0.114036	0.132	0.284	1.05053e-80
IDH3A	5.29281e-85	-0.0940002	0.044	0.149	1.12573e-80
CYHR1	5.34085e-85	-0.110898	0.077	0.202	1.13595e-80
COPS3	5.66806e-85	-0.114297	0.108	0.249	1.20554e-80
B3GNT5	5.83802e-85	-0.108847	0.039	0.14	1.24169e-80
TBC1D15	5.84353e-85	-0.125622	0.133	0.284	1.24286e-80
AP2A2	6.18684e-85	-0.115484	0.106	0.246	1.31588e-80
LSM4	6.37881e-85	-0.116937	0.124	0.271	1.35671e-80
IFIT1	8.60981e-85	0.231478	0.228	0.099	1.83122e-80
FDFT1	9.41528e-85	-0.138604	0.225	0.41	2.00254e-80
MRPL18	1.13223e-84	-0.113897	0.1	0.236	2.40814e-80
CNPPD1	1.17376e-84	-0.115838	0.129	0.279	2.49647e-80
PHF14	1.28963e-84	-0.138895	0.166	0.328	2.74292e-80
CDC25B	1.39365e-84	-0.1147	0.069	0.19	2.96416e-80
CYBB	1.45912e-84	0.192262	0.996	0.98	3.1034e-80
DRG1	1.52068e-84	-0.106387	0.104	0.245	3.23433e-80
THAP2	1.54514e-84	-0.101994	0.035	0.133	3.28637e-80
RSF1	1.80305e-84	-0.153151	0.276	0.475	3.8349e-80
GNB1	1.95526e-84	-0.161715	0.848	0.897	4.15865e-80
WTAP	2.46748e-84	-0.117127	0.243	0.44	5.24808e-80
BCL6	2.70126e-84	-0.135451	0.254	0.45	5.7453e-80
TMEM141	2.72931e-84	-0.106031	0.069	0.19	5.80496e-80
FGFR1OP2	3.10102e-84	-0.133671	0.223	0.407	6.59556e-80
AGAP3	3.39554e-84	-0.119612	0.091	0.222	7.22197e-80
USP4	3.97385e-84	-0.138733	0.315	0.531	8.45198e-80
EPM2AIP1	4.68627e-84	-0.119225	0.115	0.258	9.96722e-80
DLD	4.86961e-84	-0.119026	0.167	0.332	1.03572e-79
SLC20A1	5.58682e-84	-0.136843	0.18	0.349	1.18826e-79
C4orf3	5.9884e-84	-0.154763	0.461	0.686	1.27367e-79
ADI1	7.39693e-84	-0.119412	0.169	0.335	1.57325e-79
ITPRIPL2	7.46473e-84	-0.11626	0.084	0.211	1.58767e-79
CRNKL1	7.69912e-84	-0.123563	0.127	0.275	1.63753e-79
BRMS1	7.79242e-84	-0.114361	0.148	0.306	1.65737e-79
SETD3	7.99218e-84	-0.137093	0.225	0.407	1.69986e-79
AAMP	8.40738e-84	-0.114179	0.137	0.291	1.78816e-79
CPSF2	9.96704e-84	-0.138282	0.255	0.448	2.11989e-79
ICT1	1.05545e-83	-0.108313	0.078	0.203	2.24483e-79
DYNC1I2	1.08251e-83	-0.122648	0.205	0.385	2.30238e-79
PLEKHA2	1.24482e-83	-0.14009	0.281	0.482	2.6476e-79
EIF3D	1.31055e-83	-0.142057	0.37	0.599	2.78742e-79
DGKD	1.34031e-83	-0.136893	0.253	0.447	2.85072e-79
FEZ2	1.47616e-83	-0.115093	0.144	0.301	3.13964e-79
PLAA	1.49606e-83	-0.112162	0.091	0.221	3.18197e-79
CACYBP	1.67015e-83	-0.122938	0.155	0.313	3.55223e-79
YY1	1.97457e-83	-0.164818	0.495	0.706	4.19972e-79
FGD2	2.00262e-83	-0.12474	0.269	0.472	4.25936e-79
MIDN	2.01814e-83	-0.138792	0.248	0.441	4.29238e-79
NISCH	2.11225e-83	-0.12211	0.218	0.404	4.49255e-79
SUV420H1	2.13201e-83	-0.132223	0.198	0.372	4.53458e-79
GALNT1	2.17164e-83	-0.133742	0.256	0.452	4.61886e-79
NPEPL1	2.29682e-83	-0.110362	0.114	0.256	4.88512e-79
RHOQ	2.42865e-83	-0.126635	0.204	0.384	5.16549e-79
CCNH	2.47473e-83	-0.107175	0.073	0.195	5.2635e-79
CAMLG	2.4926e-83	-0.112928	0.139	0.293	5.30152e-79
CD69	2.65954e-83	-0.157718	0.061	0.174	5.65657e-79
C9orf69	2.75814e-83	-0.110922	0.097	0.23	5.86628e-79
APOBEC3A	2.95103e-83	-0.26128	0.272	0.452	6.27655e-79
ZRANB2	3.34609e-83	-0.126852	0.17	0.334	7.11681e-79
MCTP1	3.4219e-83	-0.119114	0.165	0.33	7.27804e-79
TXNDC11	3.73786e-83	-0.114405	0.11	0.25	7.95006e-79
IKBKE	4.41739e-83	-0.115439	0.117	0.261	9.39536e-79
TMEM62	4.50935e-83	-0.0952318	0.041	0.141	9.59094e-79
GPBP1	4.82597e-83	-0.132148	0.313	0.527	1.02644e-78
GPATCH11	4.85866e-83	-0.116156	0.058	0.171	1.03339e-78
LPXN	5.61492e-83	-0.114983	0.176	0.344	1.19424e-78
BAG1	5.72152e-83	-0.125873	0.23	0.418	1.21691e-78
BRI3BP	5.87811e-83	-0.124494	0.123	0.267	1.25022e-78
TIPRL	6.9446e-83	-0.109486	0.095	0.228	1.47705e-78
MRPL15	7.93976e-83	-0.0995405	0.06	0.173	1.68871e-78
MCTP2	8.25292e-83	-0.132294	0.144	0.297	1.75531e-78
ERGIC1	9.23565e-83	-0.113963	0.157	0.319	1.96433e-78
PDCD10	9.61761e-83	-0.124756	0.175	0.341	2.04557e-78
COQ5	9.77603e-83	-0.093088	0.054	0.164	2.07926e-78
COASY	1.04731e-82	-0.120048	0.141	0.293	2.22753e-78
UBE4A	1.05881e-82	-0.124975	0.16	0.321	2.25199e-78
PPP1R11	1.17786e-82	-0.108011	0.115	0.258	2.50518e-78
PDLIM2	1.30378e-82	-0.106857	0.112	0.254	2.77302e-78
LSM14B	1.30842e-82	-0.119852	0.132	0.281	2.78289e-78
SUSD1	1.49438e-82	-0.124338	0.24	0.428	3.1784e-78
C11orf58	1.83191e-82	-0.144059	0.336	0.549	3.89629e-78
CDYL	1.99943e-82	-0.11744	0.131	0.28	4.2526e-78
TXNDC12	2.04706e-82	-0.122248	0.186	0.356	4.35389e-78
MON1B	2.1685e-82	-0.134775	0.169	0.331	4.61219e-78
SULT1A1	2.57819e-82	-0.171239	0.357	0.565	5.48355e-78
STXBP2	2.61474e-82	-0.112085	0.139	0.292	5.56128e-78
ARL2BP	2.80889e-82	-0.111271	0.123	0.269	5.97424e-78
DERL2	3.02121e-82	-0.107525	0.103	0.239	6.42581e-78
AKR1B1	3.07249e-82	-0.100104	0.052	0.16	6.53489e-78
TMEM14C	3.24084e-82	-0.102455	0.071	0.19	6.89294e-78
ORMDL1	3.76397e-82	-0.122605	0.202	0.379	8.00558e-78
HEXA	3.98553e-82	-0.11563	0.129	0.277	8.47683e-78
RABAC1	4.37556e-82	-0.121531	0.21	0.388	9.30639e-78
TMED8	5.02213e-82	-0.129864	0.16	0.32	1.06816e-77
C8orf59	5.1828e-82	-0.0960464	0.054	0.162	1.10233e-77
S100A10	5.32661e-82	-0.175638	0.962	0.962	1.13292e-77
RBM7	6.01797e-82	-0.0967962	0.063	0.177	1.27996e-77
WDR45	7.46189e-82	-0.108898	0.1	0.235	1.58707e-77
2020-03-02	8.15376e-82	-0.108701	0.107	0.246	1.73422e-77
PRDX2	8.6758e-82	-0.0804952	0.023	0.108	1.84526e-77
NDUFC2	8.86299e-82	-0.110679	0.129	0.276	1.88507e-77
CLDND1	8.93736e-82	-0.0993892	0.061	0.174	1.90089e-77
AP2M1	1.04504e-81	-0.149342	0.489	0.704	2.22269e-77
YPEL2	1.05299e-81	-0.130751	0.15	0.305	2.2396e-77
RAB20	1.0886e-81	-0.120854	0.119	0.262	2.31534e-77
NECAP2	1.18602e-81	-0.134335	0.219	0.395	2.52255e-77
GBGT1	1.19754e-81	-0.100694	0.063	0.178	2.54704e-77
BNIP2	1.1983e-81	-0.17596	0.596	0.762	2.54866e-77
TMED5	1.25233e-81	-0.118458	0.251	0.449	2.66358e-77
MRPS7	1.29506e-81	-0.111673	0.112	0.251	2.75447e-77
SUPT4H1	1.5206e-81	-0.111636	0.207	0.388	3.23417e-77
COMMD3	1.52784e-81	-0.101943	0.09	0.22	3.24957e-77
COG4	1.61906e-81	-0.112645	0.105	0.241	3.44357e-77
NKAP	1.64735e-81	-0.113284	0.111	0.25	3.50375e-77
FLOT1	1.71709e-81	-0.150424	0.409	0.639	3.65208e-77
IP6K2	1.85258e-81	-0.116034	0.125	0.27	3.94026e-77
SERTAD2	1.98453e-81	-0.14523	0.23	0.413	4.2209e-77
AP1M1	1.98514e-81	-0.116435	0.166	0.328	4.2222e-77
ASB1	2.09961e-81	-0.099007	0.064	0.178	4.46566e-77
TMEM129	2.1441e-81	-0.096759	0.051	0.158	4.56029e-77
TRAPPC12	2.29004e-81	-0.10721	0.122	0.267	4.87069e-77
ITPA	2.30118e-81	-0.11575	0.121	0.263	4.89438e-77
RAB3GAP1	2.30471e-81	-0.115852	0.131	0.279	4.90188e-77
STK3	2.51684e-81	-0.11003	0.071	0.189	5.35307e-77
ALKBH5	2.72278e-81	-0.115907	0.194	0.365	5.79108e-77
GOLPH3	2.89593e-81	-0.124401	0.254	0.445	6.15935e-77
C7orf49	3.40682e-81	-0.0914126	0.038	0.136	7.24596e-77
VHL	3.49616e-81	-0.114873	0.186	0.357	7.43598e-77
PDPK1	3.66558e-81	-0.111592	0.134	0.283	7.79632e-77
STARD3NL	3.76437e-81	-0.104434	0.106	0.243	8.00643e-77
TIMM44	3.95143e-81	-0.0999877	0.051	0.157	8.4043e-77
DAP	4.16661e-81	-0.120765	0.236	0.425	8.86197e-77
MIEN1	5.33664e-81	-0.112932	0.134	0.282	1.13505e-76
SNRPC	5.57566e-81	-0.112556	0.152	0.307	1.18589e-76
SAR1B	6.20553e-81	-0.109218	0.121	0.264	1.31985e-76
USO1	6.21206e-81	-0.14243	0.218	0.394	1.32124e-76
LCOR	6.9126e-81	-0.133199	0.142	0.293	1.47024e-76
SLC25A19	7.41895e-81	-0.0860565	0.025	0.11	1.57794e-76
ZMYND8	7.47766e-81	-0.135416	0.167	0.327	1.59042e-76
SNX12	8.14906e-81	-0.102591	0.079	0.202	1.73322e-76
GPN1	1.05393e-80	-0.0980772	0.064	0.178	2.2416e-76
HIPK1	1.19194e-80	-0.141933	0.34	0.554	2.53515e-76
SPAG7	1.2095e-80	-0.107056	0.15	0.307	2.57248e-76
PTX3	1.22014e-80	-0.142081	0.053	0.159	2.59512e-76
CAMTA1	1.2764e-80	-0.10379	0.096	0.227	2.71477e-76
SEC62	1.29402e-80	-0.155583	0.451	0.673	2.75226e-76
AP1B1	1.58612e-80	-0.119575	0.248	0.441	3.37351e-76
TPCN2	1.67643e-80	-0.108552	0.096	0.226	3.56559e-76
SENP2	1.718e-80	-0.109311	0.085	0.21	3.65402e-76
ENTPD1	1.90172e-80	-0.12556	0.199	0.373	4.04477e-76
PABPC3	1.98646e-80	0.137103	0.146	0.043	4.22501e-76
FARSA	2.05476e-80	-0.111715	0.105	0.24	4.37027e-76
YTHDC1	2.19706e-80	-0.136075	0.287	0.486	4.67293e-76
RAP2C	2.25422e-80	-0.106616	0.163	0.326	4.79451e-76
ARNTL	2.31367e-80	-0.113596	0.102	0.235	4.92093e-76
PITPNA	2.51591e-80	-0.126647	0.225	0.407	5.35109e-76
PCNP	3.31476e-80	-0.115972	0.212	0.392	7.05015e-76
GNAQ	3.43801e-80	-0.133202	0.374	0.604	7.3123e-76
FBRS	3.57625e-80	-0.110213	0.138	0.287	7.60632e-76
TIMM23	3.6325e-80	-0.106982	0.102	0.235	7.72597e-76
TRNAU1AP	3.85928e-80	-0.104717	0.08	0.202	8.2083e-76
FKBP1C	4.36385e-80	0.110623	0.107	0.02	9.28148e-76
GOLGA2	4.38894e-80	-0.123483	0.194	0.365	9.33483e-76
PPIL4	4.62886e-80	-0.114879	0.107	0.242	9.84512e-76
CCDC43	5.74508e-80	-0.109027	0.088	0.214	1.22192e-75
TRIM7	5.94708e-80	-0.101998	0.076	0.197	1.26488e-75
DVL1	6.1915e-80	-0.0875839	0.039	0.136	1.31687e-75
SNRPE	6.40655e-80	-0.101034	0.101	0.234	1.36261e-75
FBXW2	7.03115e-80	-0.122884	0.197	0.369	1.49546e-75
RNPS1	7.28858e-80	-0.106402	0.151	0.306	1.55021e-75
GRB10	7.89929e-80	-0.094051	0.05	0.155	1.6801e-75
THAP9-AS1	7.94702e-80	-0.102825	0.07	0.186	1.69025e-75
TMED4	8.01283e-80	-0.110756	0.154	0.31	1.70425e-75
RRP12	8.04969e-80	-0.144921	0.238	0.42	1.71209e-75
S100P	8.57147e-80	-0.140818	0.059	0.169	1.82307e-75
METTL17	8.98992e-80	-0.0903755	0.053	0.16	1.91207e-75
FUS	9.29805e-80	-0.200812	0.665	0.783	1.9776e-75
DDX18	9.92298e-80	-0.12434	0.207	0.381	2.11052e-75
TRABD	1.16173e-79	-0.109741	0.157	0.314	2.47089e-75
CNOT8	1.29402e-79	-0.111629	0.18	0.347	2.75225e-75
ARPC2	1.36035e-79	-0.132703	0.995	0.994	2.89333e-75
HSBP1	1.43947e-79	-0.113066	0.296	0.505	3.06162e-75
KDM4B	1.56541e-79	-0.125761	0.184	0.35	3.32946e-75
TMEM126A	1.60595e-79	-0.0986895	0.083	0.206	3.4157e-75
VPS9D1	1.61951e-79	-0.10862	0.084	0.207	3.44453e-75
CAPN10	1.67001e-79	-0.097211	0.059	0.169	3.55194e-75
SH3PXD2B	1.67719e-79	-0.0993385	0.036	0.131	3.56721e-75
RBM17	1.69267e-79	-0.12939	0.265	0.456	3.60014e-75
DSTN	1.77879e-79	-0.105899	0.104	0.238	3.78331e-75
MYL6B	1.84244e-79	-0.0782344	0.021	0.102	3.91869e-75
N4BP2L2	1.95053e-79	-0.139868	0.346	0.562	4.14859e-75
NMI	2.00723e-79	-0.1283	0.267	0.461	4.26917e-75
RNF149	2.17897e-79	-0.180231	0.502	0.695	4.63445e-75
CPEB4	2.19123e-79	-0.135467	0.266	0.459	4.66053e-75
ZNF259	2.25735e-79	-0.108935	0.115	0.256	4.80115e-75
DNAJC17	2.62271e-79	-0.088305	0.035	0.128	5.57825e-75
SLC35B2	2.65876e-79	-0.0837487	0.036	0.131	5.65492e-75
DNAJC15	2.68359e-79	-0.110383	0.172	0.334	5.70774e-75
MRFAP1L1	2.78982e-79	-0.111167	0.102	0.235	5.93367e-75
CRK	3.30402e-79	-0.125002	0.168	0.326	7.02731e-75
WDR81	4.2034e-79	-0.098364	0.059	0.169	8.94021e-75
DDX39A	4.2507e-79	-0.115155	0.153	0.309	9.04081e-75
AFTPH	4.74561e-79	-0.134325	0.325	0.535	1.00934e-74
PIK3R1	4.92437e-79	-0.183281	0.326	0.523	1.04737e-74
APEX1	5.27816e-79	-0.123091	0.145	0.294	1.12261e-74
EPC2	5.44275e-79	-0.117571	0.153	0.307	1.15762e-74
NUDT16L1	6.01337e-79	-0.0969442	0.06	0.17	1.27898e-74
RFWD2	6.06345e-79	-0.128025	0.204	0.375	1.28963e-74
RGS19	6.67098e-79	-0.149267	0.411	0.639	1.41885e-74
GNPAT	7.58979e-79	-0.109342	0.139	0.288	1.61427e-74
STOML2	8.25259e-79	-0.100539	0.094	0.222	1.75524e-74
MRPS11	8.47399e-79	-0.101647	0.086	0.211	1.80233e-74
PRPS2	8.51242e-79	-0.0973243	0.062	0.173	1.81051e-74
DNAJC11	9.09944e-79	-0.0994921	0.057	0.166	1.93536e-74
IL10RB-AS1	9.23475e-79	-0.0825695	0.025	0.11	1.96414e-74
ANKS1A	9.271e-79	-0.104802	0.085	0.21	1.97185e-74
GTF3C5	9.46898e-79	-0.107294	0.103	0.235	2.01396e-74
ANTXR2	9.90864e-79	-0.135166	0.195	0.363	2.10747e-74
YARS	1.02224e-78	-0.118241	0.218	0.397	2.17421e-74
MARVELD1	1.07585e-78	-0.101893	0.075	0.193	2.28823e-74
SEC11C	1.10745e-78	-0.111666	0.113	0.249	2.35544e-74
FADS1	1.15497e-78	-0.191006	0.204	0.364	2.45651e-74
CTCF	1.22593e-78	-0.128457	0.21	0.383	2.60744e-74
GLUD1	1.23541e-78	-0.135916	0.334	0.543	2.62759e-74
WDR37	1.26064e-78	-0.110173	0.116	0.254	2.68126e-74
ATXN7L3B	1.28537e-78	-0.12946	0.194	0.358	2.73386e-74
CIB1	1.81194e-78	-0.113404	0.226	0.411	3.85381e-74
UPF2	2.19958e-78	-0.128449	0.193	0.36	4.67829e-74
GTF2F1	2.21812e-78	-0.136693	0.327	0.538	4.71772e-74
SPATA13	2.35822e-78	-0.121507	0.206	0.381	5.0157e-74
CUL3	2.5765e-78	-0.117172	0.226	0.406	5.47996e-74
BIRC3	2.92618e-78	-0.129009	0.09	0.215	6.22368e-74
NIPSNAP3A	3.29626e-78	-0.0922511	0.064	0.177	7.01081e-74
ISG15	3.48568e-78	0.384888	0.418	0.3	7.4137e-74
HIST2H2BE	3.70457e-78	-0.0916506	0.052	0.157	7.87925e-74
CCDC88B	3.78215e-78	-0.138276	0.261	0.451	8.04425e-74
BCL7C	3.90079e-78	-0.0899113	0.055	0.162	8.29659e-74
SPTSSA	3.9839e-78	-0.109655	0.128	0.271	8.47337e-74
NDUFB7	4.76951e-78	-0.117207	0.261	0.452	1.01443e-73
SMAP2	5.78336e-78	-0.213128	0.881	0.906	1.23006e-73
IMP3	6.25879e-78	-0.103107	0.091	0.217	1.33118e-73
AK2	6.97189e-78	-0.119705	0.247	0.435	1.48285e-73
NDUFB5	7.12565e-78	-0.109802	0.174	0.335	1.51555e-73
ITFG1	7.8073e-78	-0.108702	0.126	0.268	1.66053e-73
GBA2	8.03116e-78	-0.108603	0.1	0.23	1.70815e-73
PDCD4	8.46509e-78	-0.124707	0.185	0.35	1.80044e-73
SMG5	8.56103e-78	-0.112665	0.141	0.29	1.82085e-73
EAPP	9.33266e-78	-0.104639	0.148	0.3	1.98496e-73
CLNS1A	9.63968e-78	-0.110893	0.145	0.294	2.05026e-73
FPR1	1.00409e-77	-0.197359	0.953	0.955	2.13559e-73
FCN2	1.0907e-77	0.110283	0.103	0.019	2.31981e-73
RNF11	1.09855e-77	-0.106084	0.165	0.323	2.33651e-73
PIK3IP1	1.14908e-77	-0.145224	0.093	0.219	2.44398e-73
CRLF3	1.2551e-77	-0.120069	0.169	0.327	2.66948e-73
NOP10	1.28835e-77	-0.115219	0.223	0.402	2.7402e-73
PPA1	1.36679e-77	-0.126667	0.206	0.376	2.90702e-73
RBM27	1.5697e-77	-0.128533	0.229	0.406	3.3386e-73
LRCH4	1.73364e-77	-0.108633	0.183	0.349	3.68728e-73
SDHA	1.91663e-77	-0.111759	0.169	0.33	4.07648e-73
NUMB	2.04043e-77	-0.138206	0.397	0.626	4.33978e-73
LSM14A	2.44431e-77	-0.114863	0.326	0.545	5.1988e-73
GARS	2.74987e-77	-0.116555	0.171	0.331	5.84869e-73
DMTF1	2.77065e-77	-0.126793	0.159	0.311	5.8929e-73
OSBPL2	3.82969e-77	-0.112506	0.12	0.257	8.14536e-73
PPP4R1	4.54828e-77	-0.113106	0.209	0.382	9.67373e-73
TFEC	4.61893e-77	-0.13327	0.245	0.427	9.82401e-73
GTPBP6	4.65614e-77	-0.107381	0.101	0.231	9.90314e-73
CCNT2	4.6736e-77	-0.118064	0.128	0.269	9.94028e-73
LEPROTL1	4.77535e-77	-0.113269	0.166	0.322	1.01567e-72
COX6A1P2	4.791e-77	0.116383	0.119	0.028	1.019e-72
SF3A3	4.81687e-77	-0.122133	0.198	0.367	1.0245e-72
UBE2Q1	4.89478e-77	-0.119671	0.269	0.466	1.04107e-72
NDFIP1	6.19728e-77	-0.115781	0.261	0.452	1.3181e-72
DERA	7.3203e-77	-0.0954095	0.064	0.175	1.55695e-72
C19orf53	7.33476e-77	-0.107496	0.195	0.363	1.56003e-72
TP53BP2	7.56507e-77	-0.12003	0.182	0.344	1.60902e-72
WDR26	7.95115e-77	-0.143024	0.388	0.612	1.69113e-72
COMMD5	8.7703e-77	-0.0971907	0.078	0.198	1.86536e-72
BST2	8.83991e-77	-0.121693	0.308	0.515	1.88016e-72
C20orf27	8.84928e-77	-0.105696	0.107	0.24	1.88215e-72
RAB34	8.96053e-77	-0.105361	0.131	0.276	1.90582e-72
GAR1	8.98959e-77	-0.0957978	0.053	0.156	1.912e-72
RBM8A	9.04636e-77	-0.11316	0.201	0.372	1.92407e-72
HIGD2A	9.99732e-77	-0.108038	0.205	0.379	2.12633e-72
SLC35A4	1.01765e-76	-0.103175	0.109	0.243	2.16445e-72
HPS1	1.0208e-76	-0.111298	0.19	0.356	2.17113e-72
NOTCH2	1.08075e-76	0.303749	0.558	0.49	2.29865e-72
CBFB	1.10418e-76	-0.103317	0.144	0.293	2.34847e-72
TXNL4B	1.22138e-76	-0.0813251	0.029	0.116	2.59775e-72
TOLLIP	1.30724e-76	-0.11179	0.181	0.344	2.78037e-72
PHRF1	1.34232e-76	-0.10596	0.101	0.231	2.85499e-72
ADAP2	1.34816e-76	-0.124686	0.222	0.398	2.86741e-72
SF3B5	1.4446e-76	-0.124664	0.228	0.405	3.07253e-72
EAF2	1.44784e-76	-0.09913	0.08	0.199	3.07941e-72
CBR1	1.47159e-76	-0.123131	0.203	0.371	3.12994e-72
SREK1	1.47756e-76	-0.132477	0.274	0.467	3.14262e-72
CCDC12	1.57547e-76	-0.116223	0.18	0.341	3.35086e-72
PAF1	1.99069e-76	-0.117236	0.156	0.309	4.23401e-72
RBX1	2.00658e-76	-0.108713	0.176	0.338	4.2678e-72
SH3TC1	2.06709e-76	-0.105694	0.133	0.277	4.3965e-72
MRPL34	2.18484e-76	-0.100987	0.118	0.257	4.64695e-72
[truncated: 4,671 more rows]

## Sheet: CD16_COVID
Differentially expressed genes in CD16+ monocytes for survival vs. non-survival COVID ICU patients
gene	p_val	avg_logFC	pct.1	pct.2	p_val_adj
IFI30	1.29883e-87	-1.4915	0.855	0.983	1.65939e-83
FTH1	5.64592e-77	-1.32413	0.956	1	7.21323e-73
GAPDH	1.64761e-73	-0.916347	0.912	0.985	2.10498e-69
C20orf24	7.45765e-57	-0.626421	0.115	0.73	9.52789e-53
CD68	1.21268e-56	-0.741912	0.622	0.941	1.54932e-52
SLC31A2	2.01541e-54	-0.674918	0.153	0.735	2.57489e-50
PSMA6	2.0178e-52	-0.628117	0.124	0.698	2.57795e-48
LSP1	1.47439e-48	0.83237	0.475	0.02	1.88368e-44
FCGR3B	2.55296e-47	1.08869	0.696	0.27	3.26166e-43
FKBP5	8.82004e-47	-0.686252	0.817	0.948	1.12685e-42
CD63	1.34662e-45	-0.64889	0.979	0.993	1.72044e-41
EEF1A1	1.30587e-44	0.687251	0.982	0.819	1.66838e-40
BCAS4	1.94269e-44	0.775357	0.454	0.025	2.48198e-40
IGKC	1.16213e-43	-0.78073	0.053	0.522	1.48473e-39
SH3BGRL3	1.61963e-43	-0.678046	0.938	0.985	2.06924e-39
B2M	1.57654e-42	-0.330005	1	1	2.01419e-38
CTSB	1.39294e-40	-0.829585	0.994	1	1.77961e-36
TSC22D3	2.25352e-40	-0.586725	0.903	0.988	2.87909e-36
LYZ	5.59917e-40	-0.933979	0.965	0.998	7.1535e-36
UBB	5.20348e-39	-0.547833	0.788	0.965	6.64796e-35
S100A9	1.71983e-38	-0.952146	0.985	0.998	2.19725e-34
IGHA1	2.3402e-37	-0.779303	0.068	0.505	2.98984e-33
FOSB	9.44873e-37	-0.608921	0.82	0.96	1.20717e-32
IGHG3	1.39215e-33	-0.553819	0.071	0.485	1.77861e-29
DDIT4	1.46012e-33	-0.600505	0.1	0.522	1.86545e-29
GABARAP	2.09384e-33	-0.391654	0.103	0.552	2.67509e-29
CAMK1	2.22296e-33	-0.476656	0.124	0.567	2.84006e-29
LMNA	2.28487e-33	-0.772059	0.091	0.515	2.91915e-29
S100A8	7.37453e-33	-0.955653	0.953	0.975	9.4217e-29
PYURF	1.12838e-32	-0.412931	0.103	0.537	1.44162e-28
NR4A2	5.54351e-32	-0.607005	0.416	0.772	7.08239e-28
VSIG4	7.28136e-32	-1.18438	0.062	0.433	9.30266e-28
TIPARP	1.24979e-31	-0.649618	0.357	0.72	1.59673e-27
ILK	1.41492e-31	-0.383437	0.065	0.463	1.80771e-27
HLA-B	4.37996e-31	-0.309631	1	1	5.59583e-27
RN7SL4P	2.78661e-30	0.57599	0.316	0.015	3.56017e-26
TMBIM4	2.87792e-30	0.452247	0.322	0.015	3.67683e-26
PPIB	3.58557e-30	-0.511032	0.44	0.819	4.58093e-26
IGHG1	5.04528e-30	-0.638626	0.127	0.522	6.44586e-26
PSAP	5.87963e-30	-0.298883	1	1	7.51182e-26
MAP2K1	1.3034e-29	-0.478349	0.292	0.71	1.66523e-25
UQCR11	1.36569e-29	0.43127	0.31	0.012	1.7448e-25
LDHA	1.46148e-29	-0.491064	0.929	0.965	1.86718e-25
EREG	9.92006e-29	-0.7077	0.035	0.384	1.26739e-24
ICAM2	1.42805e-28	-0.387054	0.103	0.5	1.82448e-24
PGK1	1.62282e-28	-0.417649	0.973	0.993	2.07331e-24
ANXA1	1.97836e-28	-0.688388	0.971	0.963	2.52755e-24
C17orf76-AS1	3.21199e-28	-0.363785	0.103	0.505	4.10364e-24
DNASE1L1	3.81289e-28	-0.411277	0.124	0.522	4.87134e-24
ARHGDIA	5.05138e-28	-0.3898	0.206	0.641	6.45364e-24
CXCL2	1.16285e-27	-0.70079	0.106	0.485	1.48565e-23
PDE4B	1.9989e-27	-0.498027	0.112	0.488	2.5538e-23
AHR	2.01333e-27	-0.472144	0.162	0.569	2.57223e-23
SRGN	2.21897e-27	-0.36391	1	1	2.83496e-23
PTGER2	2.33068e-27	-0.449929	0.168	0.579	2.97768e-23
ATF3	4.11989e-27	-0.664497	0.401	0.713	5.26357e-23
HBEGF	6.43397e-27	-0.516412	0.071	0.421	8.22004e-23
THBS1	6.98975e-27	-1.46873	0.168	0.495	8.9301e-23
TREM1	1.17867e-26	-0.491853	0.139	0.512	1.50587e-22
MARCO	1.3052e-26	-0.991155	0.619	0.772	1.66753e-22
STAB1	1.50647e-26	-0.72015	0.215	0.569	1.92466e-22
SQSTM1	1.71537e-26	-0.47227	0.345	0.728	2.19156e-22
TUBA1B	1.71988e-26	-0.546526	0.558	0.829	2.19732e-22
PHB2	2.57947e-26	-0.377766	0.26	0.7	3.29554e-22
CTSD	2.73356e-26	-0.666858	0.938	0.968	3.49239e-22
FOS	3.95256e-26	-0.714568	0.979	0.983	5.04979e-22
TMEM259	6.806e-26	-0.407685	0.28	0.688	8.69535e-22
MYL6	7.10684e-26	-0.319866	1	1	9.0797e-22
GNA15	9.42748e-26	-0.38267	0.209	0.621	1.20445e-21
EAF1	1.02158e-25	-0.418616	0.118	0.488	1.30517e-21
PNP	1.24434e-25	-0.397164	0.139	0.532	1.58977e-21
MCL1	4.21583e-25	-0.397725	0.976	0.995	5.38614e-21
CLU	5.04609e-25	-0.456537	0.156	0.532	6.44689e-21
GLUL	5.78851e-25	-0.499704	0.988	0.99	7.3954e-21
LDLR	6.15564e-25	-0.521075	0.15	0.52	7.86444e-21
CXCL3	7.53997e-25	-0.579117	0.05	0.371	9.63306e-21
IER3	1.15769e-24	-0.746799	0.062	0.384	1.47907e-20
PTAFR	1.74172e-24	-0.59142	0.549	0.78	2.22522e-20
MAFG	1.87609e-24	-0.442872	0.124	0.48	2.39689e-20
NAMPT	2.05364e-24	-0.53259	0.923	0.958	2.62373e-20
SH3BP5	2.06373e-24	-0.445868	0.133	0.49	2.63663e-20
JDP2	2.25304e-24	-0.427136	0.295	0.678	2.87848e-20
TMSB4X	2.44794e-24	0.36638	1	0.995	3.12749e-20
ZNF331	2.68392e-24	-0.545831	0.083	0.413	3.42898e-20
SLA	2.69769e-24	-0.505891	0.794	0.891	3.44656e-20
CX3CR1	3.46938e-24	0.630942	0.767	0.441	4.43247e-20
MAFF	4.48582e-24	-0.490154	0.077	0.406	5.73109e-20
CLEC4E	5.63272e-24	-0.420625	0.041	0.347	7.19636e-20
EEF1D	6.35458e-24	-0.385978	0.811	0.946	8.11861e-20
ITGA2B	6.56308e-24	-0.588607	0.018	0.297	8.38499e-20
GABARAPL1	6.98439e-24	-0.397228	0.142	0.505	8.92326e-20
EIF4A1	7.16354e-24	-0.353349	0.174	0.567	9.15214e-20
IL1R2	8.09126e-24	-0.596204	0.006	0.272	1.03374e-19
JUN	1.25637e-23	-0.554886	0.808	0.874	1.60514e-19
FDPS	1.7647e-23	-0.359987	0.136	0.507	2.25457e-19
ETFB	1.85205e-23	-0.339091	0.159	0.54	2.36618e-19
NAPRT1	2.1589e-23	-0.380845	0.224	0.616	2.75821e-19
IDS	2.9687e-23	0.326041	0.233	0.005	3.79281e-19
STUB1	3.72815e-23	-0.338556	0.091	0.418	4.76308e-19
ANXA2	3.87439e-23	-0.398886	0.985	0.99	4.94992e-19
ORMDL2	5.05576e-23	-0.322125	0.109	0.453	6.45924e-19
IL8	5.12724e-23	-0.981366	0.64	0.75	6.55056e-19
CALM3	5.13775e-23	-0.402505	0.82	0.921	6.56399e-19
S100A12	6.37017e-23	-0.567717	0.118	0.458	8.13853e-19
TPT1	7.87139e-23	-0.295403	1	1	1.00565e-18
HERPUD1	8.42866e-23	-0.385561	0.292	0.691	1.07685e-18
PNRC2	1.27842e-22	0.384276	0.239	0.01	1.63331e-18
CCL3	1.36969e-22	-0.536829	0.062	0.369	1.74991e-18
NT5C2	1.48375e-22	-0.359935	0.177	0.545	1.89564e-18
LAMTOR1	1.64024e-22	-0.392909	0.26	0.639	2.09557e-18
CD302	2.25191e-22	-0.367072	0.147	0.507	2.87704e-18
MAP3K8	2.81526e-22	-0.497561	0.51	0.78	3.59678e-18
IGHM	2.85889e-22	-0.757773	0.186	0.502	3.65252e-18
HIST2H2AA4	3.28536e-22	0.348411	0.248	0.015	4.19737e-18
HLA-DQB1	3.45639e-22	-0.368589	0.103	0.441	4.41588e-18
NOTCH2	3.75376e-22	0.50369	0.847	0.626	4.7958e-18
TAP2	4.30401e-22	0.335125	0.23	0.007	5.4988e-18
PPP1R15A	6.0066e-22	-0.359932	0.932	0.96	7.67403e-18
PHC2	6.53872e-22	-0.34469	0.218	0.597	8.35387e-18
JHDM1D	8.3161e-22	-0.299784	0.038	0.317	1.06247e-17
NFIL3	9.50044e-22	-0.370298	0.254	0.634	1.21378e-17
SPARC	1.16293e-21	-0.344385	0.024	0.29	1.48576e-17
EIF3C	1.19363e-21	0.391508	0.292	0.04	1.52499e-17
SQRDL	1.19427e-21	-0.350773	0.236	0.619	1.5258e-17
H3F3C	1.20084e-21	0.365549	0.277	0.032	1.53419e-17
EIF4A3	1.34318e-21	-0.362168	0.233	0.606	1.71605e-17
SNHG5	1.65518e-21	-0.398219	0.236	0.614	2.11466e-17
TAGAP	1.99544e-21	-0.45524	0.419	0.73	2.54937e-17
NDUFA13	2.13003e-21	-0.314818	0.221	0.609	2.72132e-17
TUBB4B	2.23648e-21	-0.36142	0.189	0.554	2.85733e-17
PPDPF	2.2886e-21	-0.321805	0.177	0.547	2.92391e-17
MAN2A2	2.9328e-21	-0.318436	0.118	0.455	3.74695e-17
LSM1	3.52479e-21	-0.261968	0.062	0.361	4.50328e-17
ODC1	3.61701e-21	-0.370778	0.171	0.53	4.62109e-17
GPR183	4.12615e-21	-0.468461	0.053	0.332	5.27157e-17
EIF1	4.38991e-21	-0.324974	0.994	0.993	5.60855e-17
HK3	4.63314e-21	-0.394829	0.628	0.871	5.9193e-17
NANS	4.99282e-21	-0.334144	0.221	0.592	6.37883e-17
SIGLEC14	8.58984e-21	-0.282251	0.059	0.347	1.09744e-16
IGHG4	1.02309e-20	-0.422775	0.127	0.453	1.3071e-16
PRELID1	1.04762e-20	-0.364744	0.504	0.809	1.33844e-16
C19orf59	1.13706e-20	-0.422681	0.077	0.374	1.45271e-16
ZNF394	1.37013e-20	-0.324609	0.212	0.589	1.75047e-16
PTGS2	1.46032e-20	-0.402191	0.047	0.319	1.86571e-16
UPP1	1.5053e-20	-0.366438	0.513	0.807	1.92317e-16
PHB	1.547e-20	-0.329937	0.133	0.458	1.97644e-16
CERKL	1.56947e-20	0.39045	0.277	0.04	2.00515e-16
ICAM1	2.06977e-20	-0.342369	0.106	0.421	2.64433e-16
EGR2	2.12868e-20	-0.37797	0.041	0.312	2.7196e-16
JARID2	2.20988e-20	-0.34489	0.251	0.626	2.82335e-16
PPIF	2.27873e-20	-0.419207	0.112	0.423	2.91131e-16
HMGB2	2.6722e-20	-0.426715	0.295	0.653	3.414e-16
OAS3	3.69892e-20	0.690828	0.699	0.512	4.72574e-16
NDUFS7	3.72814e-20	-0.319468	0.118	0.426	4.76307e-16
NDUFS6	4.24521e-20	-0.325025	0.33	0.71	5.42368e-16
ACAA1	4.32857e-20	-0.404337	0.41	0.733	5.53018e-16
MGAT2	5.92169e-20	-0.248604	0.041	0.304	7.56555e-16
TRMT6	6.35407e-20	-0.434666	0.162	0.473	8.11796e-16
UQCRQ	6.78662e-20	-0.315053	0.292	0.676	8.67058e-16
TMED9	7.82423e-20	-0.371632	0.634	0.837	9.99623e-16
CHMP1B	8.10159e-20	-0.405144	0.496	0.762	1.03506e-15
ADAR	8.44759e-20	0.482049	0.947	0.78	1.07926e-15
ADCY7	1.10867e-19	-0.332256	0.271	0.639	1.41644e-15
FLVCR2	1.42182e-19	-0.332629	0.165	0.49	1.81651e-15
TMEM170B	1.45722e-19	-0.338128	0.186	0.517	1.86174e-15
LIPA	1.77184e-19	-0.571282	0.814	0.886	2.26371e-15
KYNU	2.11269e-19	-0.356344	0.295	0.661	2.69917e-15
ADAM17	2.20649e-19	-0.298334	0.263	0.653	2.81901e-15
PRDM1	2.31195e-19	-0.395464	0.091	0.379	2.95374e-15
ARPC1B	2.31963e-19	-0.255368	0.997	0.995	2.96356e-15
ESRRA	2.50762e-19	-0.308933	0.13	0.438	3.20373e-15
TNFSF10	2.71448e-19	0.440002	0.873	0.658	3.46803e-15
NR4A1	3.11573e-19	-0.328738	0.124	0.443	3.98065e-15
PRDM8	3.24893e-19	-0.453004	0.024	0.26	4.15084e-15
EMC10	3.2838e-19	-0.268113	0.147	0.483	4.19538e-15
OST4	3.28606e-19	-0.282149	0.206	0.559	4.19827e-15
CNN2	3.72576e-19	-0.323279	0.233	0.592	4.76003e-15
PSMA2	4.30011e-19	0.257911	0.201	0.007	5.49383e-15
HLA-DMA	5.51822e-19	-0.398606	0.265	0.609	7.05007e-15
C12orf44	5.97821e-19	-0.243656	0.053	0.319	7.63776e-15
PLP2	6.59323e-19	-0.285597	0.091	0.386	8.42351e-15
FLOT1	8.54763e-19	-0.314474	0.218	0.567	1.09205e-14
SRSF10	8.96892e-19	0.274919	0.215	0.015	1.14587e-14
IL1B	9.63422e-19	-0.844444	0.348	0.619	1.23087e-14
IFNAR2	9.91091e-19	-0.379049	0.378	0.708	1.26622e-14
ENO1	1.15558e-18	-0.290989	1	0.993	1.47636e-14
CD83	1.26085e-18	-0.462829	0.755	0.861	1.61086e-14
ADAMTS2	1.43637e-18	-0.292802	0.024	0.255	1.83511e-14
MLEC	1.4649e-18	-0.354258	0.168	0.48	1.87156e-14
PPP1CA	1.48827e-18	-0.316363	0.507	0.804	1.90141e-14
ETS2	1.51948e-18	-0.473813	0.664	0.795	1.94129e-14
TBC1D14	1.62814e-18	-0.271941	0.08	0.354	2.08011e-14
SLC16A6	1.68172e-18	-0.359847	0.077	0.351	2.14857e-14
GSDMD	1.90036e-18	-0.301817	0.189	0.525	2.4279e-14
SAP30	2.00117e-18	-0.283974	0.056	0.317	2.55669e-14
H3F3A	2.13765e-18	0.443679	0.363	0.114	2.73106e-14
RNF213	2.19857e-18	0.432862	0.979	0.891	2.80889e-14
RN7SL5P	3.60449e-18	0.273624	0.192	0.007	4.6051e-14
PPP1R15B	3.65958e-18	-0.443749	0.525	0.74	4.67548e-14
EXOC7	4.25229e-18	-0.266083	0.159	0.483	5.43273e-14
KLF9	6.01548e-18	-0.33212	0.227	0.569	7.68538e-14
HNRNPH2	7.27743e-18	-0.265214	0.224	0.589	9.29764e-14
SOCS3	7.5711e-18	-0.391035	0.209	0.54	9.67283e-14
S100A10	7.81716e-18	-0.358348	0.929	0.955	9.9872e-14
MMP24-AS1	8.36277e-18	-0.292319	0.174	0.502	1.06843e-13
P4HB	8.76529e-18	-0.400339	0.543	0.767	1.11985e-13
VIM	1.0209e-17	-0.282858	1	1	1.3043e-13
CD163	1.09571e-17	-1.21296	0.655	0.696	1.39987e-13
NOL7	1.28293e-17	-0.282467	0.13	0.431	1.63907e-13
GPX1	1.30041e-17	-0.658251	0.864	0.839	1.6614e-13
SHFM1	1.30876e-17	-0.272205	0.218	0.577	1.67208e-13
QSOX1	1.35068e-17	-0.283186	0.198	0.53	1.72562e-13
NLRP3	1.60112e-17	-0.338166	0.171	0.478	2.04559e-13
AES	1.67412e-17	-0.26506	0.153	0.463	2.13886e-13
AKR1A1	1.76673e-17	-0.324449	0.295	0.636	2.25717e-13
GSN	1.89309e-17	-0.32006	0.124	0.416	2.41862e-13
SLC39A8	1.93365e-17	-0.396035	0.08	0.339	2.47043e-13
ST14	1.96889e-17	-0.306726	0.088	0.361	2.51546e-13
NFE2L2	2.02753e-17	-0.36403	0.357	0.676	2.59038e-13
H2AFY	2.05962e-17	-0.29166	0.965	0.99	2.63136e-13
HBP1	2.19594e-17	-0.273917	0.174	0.5	2.80554e-13
FAM96B	2.19771e-17	-0.288531	0.251	0.594	2.8078e-13
PLIN3	2.28252e-17	-0.36774	0.401	0.693	2.91615e-13
HSD17B10	2.36264e-17	-0.294874	0.183	0.502	3.01851e-13
PCBP1	2.5247e-17	-0.357323	0.873	0.918	3.22556e-13
TSPAN4	2.63626e-17	-0.284262	0.053	0.297	3.36808e-13
CYP1B1	2.70732e-17	-0.627156	0.336	0.599	3.45887e-13
TMED1	2.80113e-17	-0.244676	0.047	0.29	3.57872e-13
SERPINB2	2.90588e-17	-0.427249	0.006	0.203	3.71255e-13
PAIP2	3.09404e-17	-0.314703	0.378	0.705	3.95294e-13
HBB	3.1828e-17	-0.467518	0.041	0.275	4.06634e-13
VTI1B	3.49141e-17	-0.26672	0.233	0.577	4.46062e-13
IL13RA1	3.53887e-17	-0.304712	0.156	0.46	4.52126e-13
CSRNP1	3.65499e-17	-0.386719	0.513	0.748	4.66962e-13
TUBB6	3.78221e-17	-0.259249	0.047	0.285	4.83215e-13
PSMA1	3.88621e-17	0.268289	0.195	0.012	4.96502e-13
RHOA	4.10096e-17	-0.243476	1	0.998	5.23938e-13
GRASP	4.32638e-17	-0.305645	0.112	0.399	5.52738e-13
CD151	4.39758e-17	-0.307087	0.245	0.587	5.61835e-13
FAM50A	4.56464e-17	-0.279516	0.263	0.614	5.83178e-13
RTFDC1	4.69134e-17	-0.298716	0.354	0.705	5.99365e-13
ALDOA	4.81941e-17	-0.299124	0.979	0.993	6.15728e-13
CYCS	5.352e-17	-0.290959	0.248	0.587	6.83771e-13
KLF4	5.68785e-17	-0.339491	0.956	0.963	7.2668e-13
PINK1	6.92448e-17	-0.256299	0.071	0.327	8.84672e-13
RFXANK	7.39627e-17	-0.267886	0.103	0.376	9.44948e-13
PER1	7.58342e-17	-0.289999	0.212	0.545	9.68857e-13
JMJD6	8.18568e-17	-0.268291	0.145	0.446	1.0458e-12
P2RX4	8.44047e-17	-0.310938	0.204	0.515	1.07835e-12
SERPINB6	8.86945e-17	-0.270106	0.289	0.649	1.13316e-12
CRIP1	9.00911e-17	0.276186	0.186	0.01	1.151e-12
COX20	9.69562e-17	-0.225548	0.068	0.319	1.23871e-12
F13A1	1.02742e-16	-0.395579	0.068	0.317	1.31264e-12
IFI27	1.08925e-16	0.625657	0.861	0.567	1.39163e-12
SIAH2	1.10426e-16	-0.232786	0.053	0.292	1.4108e-12
RER1	1.34631e-16	-0.249966	0.215	0.547	1.72004e-12
SRRM2	1.55037e-16	0.382727	0.926	0.795	1.98076e-12
ARF4	1.57776e-16	-0.269036	0.201	0.51	2.01575e-12
ISG15	1.60169e-16	0.685232	0.673	0.49	2.04632e-12
ACSL1	1.64686e-16	-0.425475	0.708	0.832	2.10402e-12
IGJ	1.69096e-16	-0.382334	0.091	0.349	2.16037e-12
STRAP	1.84455e-16	-0.265575	0.168	0.468	2.3566e-12
POLR2G	1.93282e-16	-0.245088	0.177	0.495	2.46937e-12
ZMYM6NB	2.32133e-16	-0.207838	0.024	0.233	2.96574e-12
FPR2	2.34034e-16	-0.296403	0.136	0.421	2.99002e-12
DDIT3	2.34866e-16	-0.247795	0.094	0.366	3.00065e-12
NDUFA2	2.40864e-16	-0.256601	0.206	0.525	3.07728e-12
ALDH2	2.51292e-16	-0.516141	0.499	0.703	3.21051e-12
NDUFB8	2.55478e-16	0.237339	0.174	0.007	3.26399e-12
TRMT112	2.61676e-16	-0.288764	0.215	0.525	3.34318e-12
NUDT3	2.63815e-16	-0.33906	0.298	0.629	3.3705e-12
RNF139	2.94359e-16	-0.258657	0.156	0.453	3.76073e-12
LPXN	3.09977e-16	-0.249274	0.109	0.381	3.96026e-12
SRA1	3.16991e-16	-0.299342	0.195	0.505	4.04988e-12
PSMD7	3.1917e-16	-0.290459	0.342	0.688	4.07772e-12
CSF1R	3.48027e-16	0.390583	0.971	0.842	4.4464e-12
HLA-DQA2	3.4941e-16	-0.34057	0.021	0.223	4.46407e-12
PRDX5	3.53105e-16	-0.352408	0.519	0.76	4.51128e-12
SMIM7	3.57565e-16	-0.252668	0.13	0.416	4.56826e-12
PIM3	3.77627e-16	-0.335793	0.251	0.589	4.82456e-12
KLF7	3.92624e-16	-0.29405	0.195	0.507	5.01617e-12
NDUFB9	4.1544e-16	-0.26761	0.236	0.569	5.30766e-12
OTOF	4.2341e-16	0.404989	0.239	0.04	5.40949e-12
IFITM3	4.25757e-16	0.52582	0.956	0.881	5.43947e-12
XAF1	4.2771e-16	0.441949	0.87	0.634	5.46442e-12
DPP7	4.58935e-16	-0.262367	0.23	0.569	5.86335e-12
PNPLA8	4.82705e-16	-0.366211	0.487	0.735	6.16704e-12
VAT1	5.25088e-16	-0.26586	0.091	0.349	6.70852e-12
IRS2	5.31705e-16	-0.387657	0.392	0.688	6.79306e-12
H3F3B	5.58846e-16	-0.278009	0.997	1	7.13982e-12
LFNG	5.6062e-16	-0.288656	0.224	0.557	7.16248e-12
PAQR4	5.74092e-16	-0.179818	0.012	0.205	7.3346e-12
ERH	6.12909e-16	-0.282864	0.274	0.606	7.83052e-12
SLC2A3	6.40635e-16	-0.351657	0.177	0.475	8.18475e-12
LPCAT3	7.11711e-16	-0.239781	0.077	0.324	9.09282e-12
CLIC1	7.44093e-16	-0.313869	0.673	0.844	9.50654e-12
C17orf62	7.93821e-16	-0.272048	0.322	0.663	1.01419e-11
GSTO1	8.82694e-16	-0.325955	0.714	0.861	1.12773e-11
H2AFJ	8.97663e-16	-0.25698	0.121	0.396	1.14685e-11
TMEM179B	9.57164e-16	-0.211604	0.083	0.339	1.22287e-11
NRGN	9.87275e-16	-0.269659	0.103	0.369	1.26134e-11
SPSB3	1.07399e-15	-0.23731	0.059	0.292	1.37213e-11
IGLC3	1.14629e-15	0.451589	0.28	0.069	1.4645e-11
TIMM13	1.19737e-15	-0.23743	0.127	0.403	1.52976e-11
BECN1	1.21833e-15	-0.247672	0.195	0.512	1.55654e-11
MALAT1	1.23153e-15	0.239262	1	1	1.5734e-11
METAP2	1.25174e-15	-0.274186	0.218	0.532	1.59922e-11
RHBDF2	1.36945e-15	-0.239613	0.183	0.488	1.74961e-11
POLR2E	1.41409e-15	-0.254073	0.162	0.453	1.80664e-11
CD14	1.43969e-15	-0.556798	0.832	0.832	1.83934e-11
PRDX1	1.61392e-15	-0.348939	0.749	0.879	2.06194e-11
PET100	1.81108e-15	-0.209641	0.103	0.371	2.31384e-11
DUSP1	1.81333e-15	-0.497109	0.985	0.973	2.31671e-11
DUSP2	1.88082e-15	-0.417649	0.156	0.441	2.40294e-11
SSNA1	2.08918e-15	-0.24206	0.215	0.535	2.66913e-11
PSMA3	2.101e-15	-0.260028	0.23	0.554	2.68423e-11
SNRPB	2.15579e-15	-0.262906	0.265	0.597	2.75423e-11
OAS2	2.17295e-15	0.600907	0.67	0.498	2.77616e-11
NCLN	2.24812e-15	-0.217759	0.086	0.332	2.87219e-11
C7orf41	2.27562e-15	-0.224287	0.018	0.21	2.90733e-11
COX8A	2.63024e-15	-0.29707	0.546	0.797	3.3604e-11
PSMA7	3.2168e-15	-0.269619	0.847	0.918	4.10978e-11
FAM20A	3.45132e-15	-0.255368	0.142	0.423	4.40941e-11
DDX3Y	3.47118e-15	-0.485337	0.345	0.584	4.43478e-11
S100P	3.60728e-15	-0.32855	0.029	0.228	4.60866e-11
VAPA	3.84109e-15	-0.245919	0.28	0.629	4.90738e-11
POR	4.01651e-15	-0.242669	0.15	0.438	5.1315e-11
EIF3F	4.26352e-15	-0.22124	0.28	0.631	5.44707e-11
ADAP1	4.29744e-15	-0.226855	0.139	0.423	5.49041e-11
CAPN1	4.31157e-15	-0.272802	0.186	0.475	5.50846e-11
LDHB	4.34194e-15	-0.24567	0.192	0.502	5.54727e-11
MINOS1	4.53932e-15	-0.24437	0.15	0.431	5.79944e-11
TNFRSF1A	4.66613e-15	-0.282213	0.239	0.562	5.96144e-11
USP22	4.80373e-15	-0.254763	0.139	0.416	6.13725e-11
PSENEN	5.29424e-15	-0.195881	0.086	0.337	6.76393e-11
AP1G2	5.34165e-15	-0.211105	0.062	0.295	6.8245e-11
PIN1	5.59922e-15	-0.234847	0.156	0.433	7.15356e-11
CWC25	5.69448e-15	-0.272919	0.186	0.485	7.27527e-11
MANF	6.108e-15	-0.246489	0.053	0.27	7.80358e-11
VCAN	6.54688e-15	-0.697822	0.923	0.876	8.36429e-11
PABPN1	7.16102e-15	-0.23424	0.118	0.376	9.14892e-11
SUN2	7.39541e-15	-0.294083	0.566	0.812	9.44838e-11
TTC7A	7.50832e-15	-0.27766	0.156	0.428	9.59263e-11
H2AFV	7.65137e-15	-0.270394	0.283	0.609	9.77538e-11
MRPL20	7.77427e-15	-0.212872	0.133	0.408	9.9324e-11
ARF3	8.55941e-15	-0.267791	0.242	0.547	1.09355e-10
EMP1	8.75524e-15	-0.469515	0.08	0.307	1.11857e-10
MAFK	8.78971e-15	-0.211146	0.041	0.248	1.12297e-10
TRPV2	8.91073e-15	-0.250868	0.15	0.418	1.13843e-10
IFNGR1	9.30064e-15	-0.324026	0.861	0.891	1.18825e-10
GLA	9.32542e-15	-0.22313	0.156	0.448	1.19142e-10
PKM	9.55635e-15	-0.284005	0.944	0.98	1.22092e-10
PSTPIP1	1.01368e-14	-0.242729	0.145	0.421	1.29508e-10
TMEM176A	1.01922e-14	-0.286345	0.195	0.488	1.30216e-10
MGAT4B	1.02004e-14	-0.237812	0.1	0.347	1.3032e-10
TIMM17A	1.07633e-14	-0.223328	0.124	0.389	1.37511e-10
SLC25A25	1.13198e-14	-0.275706	0.153	0.421	1.44622e-10
IFRD1	1.13788e-14	-0.22283	0.133	0.408	1.45375e-10
C19orf10	1.1391e-14	-0.260845	0.189	0.478	1.45531e-10
UBE2E1	1.15951e-14	-0.232295	0.183	0.485	1.48139e-10
CSRP1	1.1771e-14	-0.254361	0.198	0.49	1.50386e-10
HMGCL	1.25515e-14	-0.219954	0.056	0.275	1.60357e-10
ELMSAN1	1.25613e-14	-0.29929	0.195	0.48	1.60483e-10
TCIRG1	1.32548e-14	-0.311574	0.82	0.908	1.69343e-10
COMT	1.52935e-14	-0.255467	0.26	0.589	1.95389e-10
CCT7	1.62595e-14	-0.2631	0.268	0.592	2.07732e-10
FCAR	1.65867e-14	-0.195564	0.029	0.225	2.11912e-10
DDX54	1.68662e-14	-0.210526	0.142	0.426	2.15483e-10
UBXN6	1.69898e-14	-0.225254	0.15	0.428	2.17062e-10
AGPAT6	1.71768e-14	-0.272162	0.189	0.468	2.1945e-10
MPG	1.93401e-14	-0.164642	0.029	0.225	2.47089e-10
DCAF8	1.94818e-14	0.216139	0.162	0.01	2.48899e-10
C9orf72	1.97827e-14	-0.237863	0.277	0.609	2.52744e-10
RIT1	2.12729e-14	-0.256484	0.195	0.48	2.71783e-10
SMCO4	2.2351e-14	-0.288422	0.333	0.651	2.85556e-10
IDI1	2.3252e-14	-0.275307	0.254	0.572	2.97067e-10
SULT1A1	2.43602e-14	-0.258542	0.301	0.621	3.11227e-10
BCAT1	2.6356e-14	-0.319112	0.159	0.423	3.36725e-10
CDIPT	2.65125e-14	-0.225576	0.18	0.475	3.38723e-10
SOD2	2.78253e-14	-0.391123	0.929	0.953	3.55496e-10
CUEDC2	2.85744e-14	-0.224385	0.142	0.413	3.65067e-10
MXD1	2.92635e-14	-0.343223	0.454	0.71	3.7387e-10
TMEM199	3.0225e-14	-0.214302	0.091	0.332	3.86154e-10
TWISTNB	3.03121e-14	-0.276094	0.086	0.317	3.87267e-10
ACO2	3.03445e-14	-0.200966	0.127	0.391	3.87682e-10
NISCH	3.11988e-14	-0.247279	0.142	0.408	3.98596e-10
RN7SL128P	3.13504e-14	0.24882	0.153	0.007	4.00533e-10
MYL9	3.23093e-14	-0.213391	0.006	0.171	4.12784e-10
IFIT3	3.69534e-14	0.544097	0.646	0.45	4.72116e-10
NME1	3.77645e-14	-0.227614	0.124	0.384	4.8248e-10
PUF60	3.85365e-14	-0.24692	0.313	0.634	4.92343e-10
BASP1	3.85397e-14	-0.333276	0.204	0.483	4.92383e-10
MX1	3.89038e-14	0.527126	0.678	0.498	4.97034e-10
PTTG1IP	3.89702e-14	-0.266811	0.826	0.906	4.97883e-10
CXCR4	3.99723e-14	-0.356831	0.242	0.54	5.10686e-10
VAMP8	4.24366e-14	-0.326841	0.923	0.928	5.4217e-10
PLOD1	4.2447e-14	-0.212615	0.118	0.374	5.42303e-10
KLC1	4.30808e-14	-0.217987	0.133	0.399	5.504e-10
MAZ	4.46568e-14	-0.202755	0.053	0.26	5.70535e-10
MMP14	4.53494e-14	-0.188599	0.027	0.213	5.79384e-10
NHP2	4.66556e-14	-0.219688	0.1	0.342	5.96072e-10
ATL3	4.70619e-14	-0.226901	0.159	0.433	6.01263e-10
SUCLG1	4.72902e-14	-0.23005	0.215	0.512	6.0418e-10
INPPL1	4.79448e-14	-0.227515	0.121	0.369	6.12543e-10
AKIRIN2	4.95956e-14	-0.248316	0.159	0.431	6.33634e-10
PF4	5.01075e-14	-0.358668	0.029	0.218	6.40173e-10
BLVRB	5.5357e-14	-0.429615	0.543	0.723	7.07241e-10
SGMS1	6.059e-14	-0.209848	0.106	0.356	7.74098e-10
RNF187	6.3679e-14	-0.228477	0.162	0.438	8.13563e-10
CFL1	6.41837e-14	-0.246108	0.991	0.998	8.20011e-10
ZMAT5	6.5241e-14	-0.161888	0.012	0.181	8.33518e-10
TSPAN17	6.89215e-14	-0.223008	0.088	0.319	8.80541e-10
MRPS18A	6.9278e-14	-0.174071	0.027	0.21	8.85096e-10
CLCN7	7.0671e-14	-0.226572	0.094	0.327	9.02892e-10
SF3B5	7.88876e-14	-0.274341	0.209	0.488	1.00787e-09
SEC13	8.53021e-14	-0.226331	0.209	0.498	1.08982e-09
ZNF267	8.78434e-14	-0.245269	0.145	0.401	1.12229e-09
XBP1	9.1501e-14	-0.299093	0.183	0.448	1.16902e-09
HEXB	9.50166e-14	-0.256117	0.218	0.507	1.21393e-09
TUBB1	9.66943e-14	-0.30235	0.032	0.223	1.23537e-09
ARL8B	9.74119e-14	-0.24232	0.316	0.644	1.24453e-09
NEU1	9.89247e-14	-0.285009	0.201	0.498	1.26386e-09
FKBP3	9.99392e-14	-0.207909	0.127	0.386	1.27682e-09
BEST1	1.08242e-13	-0.257385	0.156	0.421	1.3829e-09
HIPK2	1.09779e-13	-0.307884	0.242	0.535	1.40254e-09
PAPSS2	1.11189e-13	-0.262299	0.139	0.399	1.42055e-09
HNRNPUL2	1.14394e-13	-0.230767	0.227	0.522	1.4615e-09
CEBPA	1.16243e-13	-0.241746	0.145	0.413	1.48511e-09
CCDC107	1.28117e-13	-0.191436	0.038	0.228	1.63683e-09
POC1B-GALNT4	1.30471e-13	-0.204371	0.035	0.225	1.6669e-09
TMEM141	1.32146e-13	-0.204209	0.109	0.351	1.6883e-09
VDAC3	1.33487e-13	-0.216998	0.192	0.47	1.70543e-09
POLR2L	1.46369e-13	-0.208256	0.124	0.371	1.87001e-09
PFKFB3	1.4653e-13	-0.277887	0.206	0.485	1.87206e-09
NAA20	1.4722e-13	-0.235739	0.15	0.408	1.88088e-09
VPS51	1.49702e-13	-0.196967	0.08	0.302	1.91259e-09
CAPG	1.53378e-13	-0.293447	0.159	0.426	1.95956e-09
IDH3B	1.56465e-13	-0.246907	0.209	0.495	1.99899e-09
CLEC10A	1.56848e-13	-0.31031	0.038	0.225	2.00389e-09
FBP1	1.59053e-13	-0.446372	0.652	0.767	2.03206e-09
DPY30	1.61133e-13	-0.202844	0.091	0.324	2.05863e-09
NUBP1	1.61744e-13	-0.192911	0.091	0.324	2.06644e-09
MAT2A	1.62046e-13	-0.203575	0.139	0.399	2.07029e-09
PTOV1	1.66814e-13	-0.199609	0.083	0.307	2.13121e-09
TXNL4A	1.69679e-13	-0.235391	0.26	0.567	2.16782e-09
CREM	1.70735e-13	-0.211667	0.056	0.262	2.18131e-09
ASGR2	1.82749e-13	-0.284118	0.047	0.243	2.3348e-09
SLC38A2	1.84482e-13	-0.346984	0.378	0.658	2.35695e-09
MACF1	1.91313e-13	0.322671	0.935	0.75	2.44422e-09
CTDSP1	1.92379e-13	-0.223042	0.271	0.599	2.45783e-09
TPST1	2.05697e-13	-0.178911	0.006	0.161	2.62799e-09
ABTB1	2.06243e-13	-0.215012	0.127	0.379	2.63496e-09
PLEKHO2	2.09539e-13	-0.249714	0.221	0.505	2.67707e-09
CPM	2.13427e-13	-0.282581	0.086	0.302	2.72674e-09
RNF7	2.16452e-13	-0.217379	0.265	0.582	2.76539e-09
HCAR3	2.17051e-13	-0.221146	0.059	0.27	2.77304e-09
FOSL2	2.17511e-13	-0.23749	0.224	0.525	2.77891e-09
SRSF2	2.18284e-13	-0.270139	0.617	0.809	2.78879e-09
TXNDC11	2.26708e-13	-0.209431	0.106	0.342	2.89642e-09
EIF3I	2.36587e-13	-0.237342	0.263	0.579	3.02263e-09
NDEL1	2.40474e-13	-0.219239	0.124	0.369	3.0723e-09
RALY	2.41662e-13	-0.280452	0.383	0.683	3.08747e-09
NFKBIB	2.41903e-13	-0.200438	0.071	0.287	3.09055e-09
PHLDA1	2.46406e-13	-0.235653	0.029	0.21	3.14809e-09
PPBP	2.64737e-13	-0.37028	0.041	0.233	3.38227e-09
MRPL14	2.67157e-13	-0.233281	0.13	0.384	3.4132e-09
WDR83OS	2.68348e-13	-0.209085	0.227	0.545	3.42842e-09
BNIP3L	2.70365e-13	-0.339613	0.395	0.653	3.45418e-09
TPI1	2.90433e-13	-0.258204	0.894	0.946	3.71057e-09
ACAA2	2.94881e-13	-0.221995	0.212	0.502	3.7674e-09
SGMS2	2.96932e-13	-0.203209	0.053	0.255	3.79361e-09
AP1B1	2.99194e-13	-0.241009	0.251	0.55	3.82251e-09
DHX15	3.00435e-13	-0.202492	0.224	0.517	3.83835e-09
DNM1L	3.14009e-13	-0.227029	0.189	0.465	4.01178e-09
NDUFA8	3.14073e-13	-0.189228	0.074	0.292	4.0126e-09
RANGAP1	3.33275e-13	-0.226695	0.124	0.366	4.25792e-09
IFIT1	3.35716e-13	0.481648	0.348	0.144	4.28911e-09
MYADM	3.3629e-13	-0.373725	0.64	0.767	4.29644e-09
ENTPD6	3.38025e-13	-0.191689	0.065	0.277	4.31861e-09
HCAR2	3.4559e-13	-0.195676	0.044	0.24	4.41526e-09
UBE2K	3.51993e-13	-0.224929	0.292	0.594	4.49706e-09
STT3A	3.65691e-13	-0.209282	0.077	0.292	4.67207e-09
DNAJB2	3.91648e-13	-0.204209	0.097	0.329	5.00369e-09
SERPINA1	3.95745e-13	0.362668	0.988	0.933	5.05604e-09
GPCPD1	4.08473e-13	-0.330976	0.575	0.777	5.21866e-09
HSD17B4	4.18798e-13	-0.245318	0.209	0.483	5.35056e-09
PRPF19	4.3737e-13	-0.207374	0.195	0.473	5.58784e-09
ACTB	4.4454e-13	0.272312	1	0.998	5.67944e-09
ITFG1	4.56044e-13	-0.213411	0.127	0.371	5.82642e-09
AKT1	4.60534e-13	-0.226229	0.195	0.465	5.88379e-09
MRPL28	4.75377e-13	-0.204461	0.145	0.396	6.07342e-09
NPL	4.79253e-13	-0.239209	0.227	0.515	6.12293e-09
FAM20C	4.79282e-13	-0.220329	0.074	0.29	6.12331e-09
LLPH	4.79422e-13	-0.213158	0.121	0.361	6.12509e-09
DCTN2	4.84367e-13	-0.212513	0.186	0.465	6.18828e-09
NIPA2	5.09272e-13	-0.216193	0.183	0.455	6.50646e-09
CHMP1A	5.25075e-13	-0.185324	0.168	0.45	6.70836e-09
TREML1	5.25787e-13	-0.209431	0.009	0.163	6.71746e-09
CCM2	5.34287e-13	-0.223199	0.28	0.614	6.82605e-09
FRAT1	5.38051e-13	-0.243052	0.177	0.441	6.87414e-09
SNHG6	5.40689e-13	-0.190763	0.124	0.366	6.90784e-09
LYST	5.58039e-13	0.318516	0.926	0.7	7.12951e-09
CYB561A3	5.58196e-13	-0.209922	0.071	0.277	7.13151e-09
FAM53C	5.74211e-13	-0.207922	0.109	0.342	7.33612e-09
MFSD12	5.82166e-13	-0.226871	0.145	0.399	7.43776e-09
PNKD	6.02924e-13	-0.232305	0.189	0.465	7.70295e-09
SELK	6.20489e-13	-0.250281	0.23	0.515	7.92736e-09
TMEM14C	6.43651e-13	-0.204209	0.109	0.344	8.22329e-09
DNAJC8	6.89356e-13	-0.23005	0.268	0.572	8.80722e-09
EIF6	6.91293e-13	-0.212351	0.224	0.52	8.83195e-09
GRPEL1	6.99517e-13	-0.245658	0.206	0.468	8.93703e-09
VPS4A	7.26481e-13	-0.232492	0.159	0.406	9.28152e-09
PGAM1	7.34113e-13	-0.215323	0.215	0.498	9.37903e-09
PDK4	7.37407e-13	-0.428234	0.28	0.54	9.42111e-09
UBE2F	7.38507e-13	-0.203086	0.159	0.416	9.43517e-09
SEC31B	7.44412e-13	-0.164911	0.056	0.26	9.51061e-09
CNOT2	7.78891e-13	-0.216337	0.218	0.495	9.95111e-09
DAB2	8.15568e-13	-0.261042	0.109	0.339	1.04197e-08
BLCAP	8.31146e-13	-0.190727	0.094	0.324	1.06187e-08
SLC25A19	8.32424e-13	-0.194691	0.041	0.225	1.06351e-08
DNAJB9	8.42809e-13	-0.201171	0.056	0.252	1.07677e-08
CRELD2	8.66637e-13	-0.23092	0.091	0.309	1.10722e-08
SGTB	8.97961e-13	-0.204197	0.168	0.436	1.14723e-08
PRDX3	9.09322e-13	-0.20288	0.254	0.547	1.16175e-08
ZBTB11	9.29537e-13	-0.258128	0.106	0.334	1.18758e-08
SMAP2	9.35632e-13	-0.263728	0.947	0.978	1.19536e-08
GZF1	9.38897e-13	-0.209394	0.071	0.28	1.19954e-08
C1orf85	9.83454e-13	-0.191704	0.086	0.304	1.25646e-08
R3HCC1L	1.00253e-12	-0.206883	0.1	0.329	1.28083e-08
OTUD1	1.0657e-12	-0.390824	0.292	0.559	1.36153e-08
C10orf137	1.08316e-12	-0.149847	0.015	0.173	1.38385e-08
DAD1	1.11584e-12	-0.227173	0.221	0.5	1.4256e-08
HTATIP2	1.12418e-12	-0.228513	0.171	0.433	1.43625e-08
MAF	1.13924e-12	-0.2854	0.133	0.364	1.4555e-08
ECH1	1.16236e-12	-0.247945	0.233	0.512	1.48503e-08
UBALD2	1.19772e-12	-0.298217	0.499	0.733	1.53021e-08
ZNHIT1	1.23205e-12	-0.204075	0.251	0.557	1.57406e-08
NUP214	1.25172e-12	-0.23577	0.283	0.589	1.59919e-08
PSMB7	1.26081e-12	-0.232013	0.292	0.589	1.6108e-08
DERL1	1.28385e-12	-0.195604	0.189	0.46	1.64025e-08
CBWD6	1.30921e-12	0.231243	0.186	0.03	1.67265e-08
ADRM1	1.4305e-12	-0.187013	0.059	0.255	1.82761e-08
KBTBD8	1.47619e-12	-0.213877	0.062	0.262	1.88598e-08
CCNY	1.48687e-12	-0.227401	0.268	0.574	1.89962e-08
PAFAH1B2	1.50262e-12	-0.205322	0.204	0.483	1.91975e-08
CD59	1.52571e-12	-0.216103	0.05	0.238	1.94924e-08
C11orf31	1.56112e-12	-0.209593	0.171	0.433	1.99449e-08
PLXND1	1.59947e-12	-0.23391	0.165	0.423	2.04349e-08
ARL4A	1.60478e-12	-0.2114	0.195	0.47	2.05026e-08
PGS1	1.69876e-12	-0.201331	0.056	0.25	2.17034e-08
LIMK2	1.74574e-12	-0.204502	0.065	0.265	2.23036e-08
UBE2I	1.74629e-12	-0.221825	0.31	0.609	2.23106e-08
TCEB1	1.78312e-12	-0.194553	0.139	0.386	2.27811e-08
RAB5A	1.83341e-12	-0.204751	0.224	0.507	2.34236e-08
IGFBP7	1.9309e-12	-0.170993	0.059	0.26	2.46692e-08
MRPL9	1.94402e-12	-0.180994	0.071	0.277	2.48368e-08
RBM47	2.00567e-12	-0.269418	0.286	0.569	2.56244e-08
BCL3	2.01367e-12	-0.189884	0.08	0.29	2.57266e-08
TRAPPC12	2.03004e-12	-0.205235	0.142	0.386	2.59358e-08
RAB13	2.10423e-12	-0.166707	0.029	0.2	2.68837e-08
KXD1	2.14561e-12	-0.194576	0.08	0.285	2.74123e-08
PDHB	2.17493e-12	-0.224519	0.15	0.399	2.7787e-08
MGAT1	2.18172e-12	-0.296058	0.782	0.859	2.78736e-08
CHURC1	2.24045e-12	-0.224287	0.209	0.485	2.8624e-08
SAR1A	2.29059e-12	-0.217147	0.295	0.589	2.92646e-08
CHMP3	2.30195e-12	-0.23005	0.239	0.515	2.94097e-08
TMEM39A	2.31734e-12	-0.165756	0.044	0.23	2.96064e-08
IL1RN	2.32904e-12	-0.268754	0.118	0.339	2.97558e-08
MRFAP1	2.36144e-12	-0.251491	0.525	0.772	3.01698e-08
CD97	2.38219e-12	-0.307381	0.914	0.923	3.04349e-08
2020-03-07	2.43014e-12	-0.207485	0.263	0.559	3.10475e-08
BATF	2.44713e-12	-0.194381	0.059	0.255	3.12646e-08
PPM1B	2.51535e-12	-0.221806	0.142	0.379	3.21361e-08
YWHAG	2.53212e-12	-0.285998	0.537	0.752	3.23503e-08
PRNP	2.54414e-12	-0.253011	0.286	0.587	3.25039e-08
CYC1	2.56749e-12	-0.252625	0.416	0.698	3.28022e-08
PICK1	2.58104e-12	-0.165131	0.024	0.188	3.29754e-08
PPP2CB	2.64982e-12	-0.169534	0.088	0.309	3.38541e-08
TAGLN	2.65899e-12	-0.255245	0.13	0.359	3.39712e-08
CCT4	2.66853e-12	-0.229351	0.263	0.535	3.40931e-08
LHFPL2	2.67061e-12	-0.23683	0.088	0.304	3.41197e-08
LILRA6	2.69518e-12	-0.241567	0.263	0.554	3.44337e-08
SLC15A3	2.73152e-12	-0.229482	0.383	0.691	3.48979e-08
ARL6IP4	2.78836e-12	-0.151128	0.021	0.181	3.56241e-08
NUDC	2.84134e-12	-0.224262	0.218	0.485	3.63009e-08
MDH2	2.8571e-12	-0.217121	0.248	0.53	3.65023e-08
SRI	2.8703e-12	-0.232848	0.239	0.525	3.66709e-08
JMJD8	2.90951e-12	-0.166992	0.047	0.233	3.71719e-08
GTF3C6	2.92749e-12	-0.213977	0.174	0.433	3.74016e-08
PIGT	2.93962e-12	-0.201674	0.162	0.406	3.75565e-08
AP2A2	3.16263e-12	-0.196149	0.115	0.349	4.04057e-08
TRAPPC3	3.18497e-12	-0.179263	0.192	0.465	4.06912e-08
HADHB	3.24476e-12	-0.212978	0.28	0.584	4.14551e-08
NOC2L	3.28937e-12	-0.200821	0.127	0.359	4.2025e-08
PPP2R3C	3.31173e-12	-0.191398	0.153	0.406	4.23107e-08
PSMA5	3.34258e-12	-0.231456	0.242	0.525	4.27048e-08
GBGT1	3.3431e-12	-0.180715	0.05	0.24	4.27114e-08
NQO2	3.3872e-12	-0.199115	0.103	0.319	4.32749e-08
HLA-G	3.53781e-12	-0.216906	0.248	0.53	4.5199e-08
AZIN1	3.62322e-12	-0.224363	0.289	0.599	4.62903e-08
KDELR2	3.67957e-12	-0.163989	0.171	0.438	4.70101e-08
SSR4	3.67995e-12	-0.216929	0.286	0.597	4.7015e-08
VDAC2	3.99736e-12	-0.196149	0.136	0.369	5.10702e-08
ZNF330	4.04582e-12	-0.190963	0.115	0.344	5.16893e-08
GNPTG	4.08087e-12	-0.212809	0.227	0.502	5.21371e-08
MSN	4.14123e-12	0.269602	0.994	0.985	5.29084e-08
MRPL24	4.21842e-12	-0.20746	0.106	0.324	5.38946e-08
KDM7A	4.44814e-12	0.180305	0.133	0.007	5.68295e-08
PRPF4	4.77298e-12	-0.172103	0.071	0.272	6.09796e-08
LAT2	4.94746e-12	-0.262671	0.345	0.624	6.32088e-08
C6orf47	5.0047e-12	-0.172736	0.074	0.277	6.394e-08
UBE2D2	5.03708e-12	-0.18723	0.26	0.562	6.43537e-08
ZNRD1-AS1	5.043e-12	0.233774	0.174	0.027	6.44293e-08
NDUFA6	5.17419e-12	-0.213337	0.307	0.631	6.61054e-08
CHTOP	5.20036e-12	-0.207974	0.206	0.475	6.64398e-08
SNHG17	5.33798e-12	-0.158245	0.035	0.208	6.8198e-08
DYNC1I2	5.3649e-12	-0.163481	0.209	0.498	6.85419e-08
PTPMT1	5.42882e-12	-0.155003	0.035	0.208	6.93586e-08
DNAJA1	5.44919e-12	-0.317062	0.864	0.891	6.96189e-08
WDR81	5.60794e-12	-0.176474	0.077	0.28	7.16471e-08
AP3S1	5.68738e-12	-0.195073	0.15	0.396	7.2662e-08
TRIM25	5.69341e-12	-0.221075	0.224	0.505	7.2739e-08
UROD	5.70607e-12	-0.246337	0.147	0.376	7.29007e-08
NUDT16	6.27205e-12	-0.234004	0.366	0.666	8.01317e-08
SERTAD1	6.31353e-12	-0.212078	0.103	0.322	8.06616e-08
ASPH	6.96626e-12	-0.188551	0.062	0.252	8.9001e-08
BTBD6	7.38114e-12	-0.203793	0.077	0.275	9.43014e-08
AIMP2	7.72427e-12	-0.175164	0.047	0.228	9.86853e-08
CXXC1	7.75792e-12	-0.167608	0.133	0.369	9.91152e-08
GPX4	7.85563e-12	-0.234536	0.307	0.594	1.00364e-07
CCRL2	8.01157e-12	-0.155942	0.041	0.218	1.02356e-07
RGL2	8.13157e-12	-0.18311	0.071	0.272	1.03889e-07
FAM129B	8.19113e-12	-0.225208	0.153	0.386	1.0465e-07
SNX12	8.24442e-12	-0.17968	0.08	0.285	1.05331e-07
BAX	8.36094e-12	-0.19999	0.183	0.436	1.06819e-07
TMBIM1	8.53048e-12	-0.223307	0.254	0.542	1.08985e-07
MARCKS	8.72922e-12	0.298228	0.944	0.745	1.11525e-07
C1QBP	8.78095e-12	-0.181497	0.147	0.391	1.12185e-07
MGST1	8.83467e-12	-0.179847	0.032	0.198	1.12872e-07
CKAP4	9.44415e-12	-0.226353	0.271	0.557	1.20659e-07
RASSF1	9.47175e-12	-0.198195	0.13	0.359	1.21011e-07
TAF13	9.58016e-12	-0.214783	0.124	0.344	1.22396e-07
ARRDC2	1.06105e-11	-0.219557	0.233	0.505	1.3556e-07
AKR7A2	1.06722e-11	-0.162588	0.068	0.265	1.36347e-07
C1orf122	1.09288e-11	-0.192499	0.127	0.356	1.39626e-07
TXNDC17	1.10117e-11	-0.193879	0.209	0.47	1.40686e-07
PSMC4	1.16817e-11	-0.180795	0.162	0.413	1.49246e-07
MPV17	1.17584e-11	-0.188726	0.094	0.304	1.50225e-07
ITGA7	1.20666e-11	-0.301974	0.065	0.25	1.54163e-07
TK2	1.21337e-11	-0.194472	0.112	0.327	1.5502e-07
FAM89B	1.22205e-11	-0.198587	0.198	0.458	1.56129e-07
SHKBP1	1.22964e-11	-0.25337	0.369	0.631	1.57099e-07
SNX17	1.25897e-11	-0.210453	0.363	0.686	1.60847e-07
PIK3R5	1.27613e-11	-0.234642	0.271	0.547	1.63039e-07
MRPL23	1.28416e-11	-0.196388	0.186	0.438	1.64065e-07
LGALS8	1.31338e-11	-0.220822	0.277	0.564	1.67798e-07
LSM14B	1.31413e-11	-0.198099	0.133	0.369	1.67893e-07
TUBA1C	1.32419e-11	-0.204812	0.153	0.401	1.69178e-07
AP5Z1	1.34623e-11	-0.16486	0.074	0.272	1.71995e-07
DBI	1.36388e-11	-0.243564	0.395	0.678	1.74249e-07
AGAP3	1.36434e-11	-0.205111	0.118	0.339	1.74308e-07
RBM5	1.36602e-11	-0.189012	0.245	0.537	1.74523e-07
CD37	1.3804e-11	-0.223415	0.265	0.554	1.7636e-07
IST1	1.38693e-11	-0.208202	0.286	0.582	1.77195e-07
CDK9	1.39774e-11	-0.201747	0.165	0.406	1.78576e-07
TMEM106A	1.40041e-11	-0.21849	0.083	0.28	1.78916e-07
CTSA	1.41242e-11	-0.298578	0.732	0.834	1.8045e-07
VPS37C	1.4142e-11	-0.176846	0.083	0.287	1.80678e-07
SNAP23	1.42798e-11	-0.232005	0.286	0.562	1.82438e-07
MRPL51	1.45402e-11	-0.204791	0.177	0.428	1.85766e-07
CHMP6	1.47109e-11	-0.173386	0.05	0.225	1.87946e-07
HNMT	1.47575e-11	-0.187821	0.112	0.329	1.88542e-07
NFKBIE	1.51193e-11	-0.216033	0.192	0.453	1.93164e-07
SLC35B2	1.53049e-11	-0.152523	0.029	0.191	1.95535e-07
DSE	1.64015e-11	-0.257552	0.286	0.569	2.09545e-07
CIB1	1.64577e-11	-0.231266	0.339	0.621	2.10263e-07
UFC1	1.70623e-11	-0.195891	0.295	0.614	2.17988e-07
STOM	1.73786e-11	-0.218439	0.215	0.475	2.22029e-07
EGLN2	1.74356e-11	-0.188429	0.153	0.391	2.22757e-07
TINF2	1.74933e-11	-0.193198	0.171	0.421	2.23494e-07
RBPJ	1.81758e-11	-0.266738	0.513	0.752	2.32213e-07
NR4A3	1.87033e-11	-0.151798	0.006	0.139	2.38954e-07
ZNF207	1.89282e-11	-0.210837	0.301	0.611	2.41826e-07
SLC25A28	1.91062e-11	-0.204674	0.189	0.438	2.44101e-07
UBA3	1.9815e-11	-0.188281	0.186	0.438	2.53156e-07
AGFG1	2.00478e-11	-0.242273	0.28	0.557	2.56131e-07
GLIPR1	2.01854e-11	-0.306698	0.649	0.795	2.57889e-07
SPOP	2.04726e-11	-0.220438	0.212	0.468	2.61559e-07
FAM21B	2.06785e-11	0.212116	0.212	0.052	2.64188e-07
ANAPC15	2.10474e-11	-0.16753	0.035	0.198	2.68901e-07
EMC6	2.11079e-11	-0.157025	0.035	0.2	2.69675e-07
TPCN2	2.11886e-11	-0.209394	0.086	0.28	2.70705e-07
APEH	2.13144e-11	-0.184473	0.13	0.359	2.72313e-07
SNW1	2.17735e-11	-0.195264	0.298	0.604	2.78179e-07
EIF4H	2.22624e-11	-0.213212	0.313	0.616	2.84424e-07
RABL6	2.25847e-11	-0.217628	0.248	0.51	2.88543e-07
SLC43A2	2.34567e-11	-0.37187	0.693	0.807	2.99682e-07
EBNA1BP2	2.35349e-11	-0.195479	0.139	0.366	3.00682e-07
SAMSN1	2.42435e-11	-0.278322	0.493	0.74	3.09735e-07
GLIPR2	2.49053e-11	-0.30074	0.493	0.703	3.18191e-07
AZI2	2.55819e-11	-0.182277	0.109	0.324	3.26834e-07
RETN	2.5706e-11	-0.242859	0.044	0.213	3.2842e-07
FES	2.61239e-11	-0.23833	0.18	0.416	3.3376e-07
GYG1	2.63185e-11	-0.190348	0.224	0.498	3.36245e-07
EHD4	2.65708e-11	-0.219049	0.189	0.441	3.39469e-07
RIPK2	2.73782e-11	-0.234565	0.186	0.431	3.49783e-07
PDXK	2.83646e-11	-0.190134	0.201	0.46	3.62386e-07
NDUFS4	2.95814e-11	-0.182226	0.133	0.361	3.77932e-07
SLC25A36	3.04052e-11	-0.21757	0.168	0.403	3.88457e-07
GLO1	3.06694e-11	-0.202399	0.183	0.428	3.91833e-07
RAB32	3.08313e-11	-0.200108	0.189	0.446	3.939e-07
GNAQ	3.24835e-11	-0.23248	0.316	0.599	4.15009e-07
LINC00936	3.29219e-11	-0.225105	0.209	0.468	4.2061e-07
EIF3CL	3.32076e-11	0.168071	0.136	0.012	4.2426e-07
UQCRC2	3.32281e-11	-0.248852	0.392	0.651	4.24523e-07
TMEM147	3.40044e-11	-0.202695	0.153	0.384	4.3444e-07
RAB34	3.4172e-11	-0.179243	0.115	0.332	4.36582e-07
HAT1	3.68692e-11	-0.174092	0.106	0.317	4.7104e-07
TTYH3	3.70233e-11	-0.202181	0.248	0.525	4.7301e-07
EIF5A	3.75874e-11	-0.200906	0.265	0.557	4.80217e-07
GNG11	3.77207e-11	-0.164308	0.018	0.161	4.8192e-07
BUD31	3.7839e-11	-0.182165	0.18	0.431	4.83432e-07
GINM1	3.81369e-11	-0.170488	0.103	0.314	4.87237e-07
PITPNA	3.82574e-11	-0.233803	0.292	0.579	4.88776e-07
ACP2	3.87134e-11	-0.235684	0.221	0.48	4.94603e-07
HSF1	3.92367e-11	-0.172292	0.106	0.319	5.01288e-07
CUL3	4.06897e-11	-0.172385	0.221	0.49	5.19851e-07
PGD	4.15398e-11	-0.297671	0.723	0.824	5.30712e-07
B4GALT5	4.23722e-11	-0.261762	0.336	0.616	5.41348e-07
PHACTR1	4.34522e-11	-0.189073	0.038	0.2	5.55145e-07
PPP4C	4.36873e-11	-0.188159	0.274	0.584	5.58148e-07
KAT5	4.38629e-11	-0.162244	0.05	0.223	5.60393e-07
CCNL1	4.38801e-11	-0.268644	0.888	0.913	5.60612e-07
POLDIP2	4.41988e-11	-0.17261	0.15	0.384	5.64684e-07
RABAC1	4.53191e-11	-0.187384	0.147	0.371	5.78997e-07
SDPR	4.5579e-11	-0.175164	0.035	0.198	5.82317e-07
CDC34	4.57648e-11	-0.166335	0.08	0.272	5.84691e-07
SIGLEC7	4.69541e-11	-0.198784	0.083	0.275	5.99885e-07
SPAG7	4.72931e-11	-0.199851	0.177	0.418	6.04216e-07
TMED3	4.7472e-11	-0.206249	0.147	0.366	6.06502e-07
PRCP	4.75745e-11	-0.247442	0.268	0.53	6.07811e-07
TRADD	4.8195e-11	-0.17116	0.136	0.364	6.1574e-07
NDRG1	4.88864e-11	-0.275709	0.274	0.547	6.24572e-07
COX4I1	4.89242e-11	-0.208577	0.979	0.983	6.25055e-07
KRR1	4.934e-11	-0.188188	0.086	0.277	6.30368e-07
PHF17	4.98286e-11	-0.179926	0.065	0.25	6.3661e-07
GLRX3	5.05973e-11	-0.196685	0.094	0.292	6.46431e-07
UGP2	5.28412e-11	-0.237664	0.339	0.629	6.75099e-07
SUPT4H1	5.30574e-11	-0.183921	0.245	0.527	6.77861e-07
SNF8	5.31623e-11	-0.220156	0.239	0.493	6.79201e-07
IRF8	5.39592e-11	-0.300053	0.413	0.663	6.89383e-07
SNX11	5.58499e-11	-0.166798	0.115	0.329	7.13539e-07
NDUFS5	5.61683e-11	-0.214675	0.378	0.651	7.17607e-07
RAB20	5.67306e-11	-0.188133	0.118	0.329	7.2479e-07
MOB2	5.68184e-11	-0.188726	0.103	0.307	7.25912e-07
IMPDH1	5.80828e-11	-0.199279	0.277	0.557	7.42066e-07
IMPA2	5.8084e-11	-0.219016	0.239	0.505	7.42081e-07
CCR2	5.82705e-11	-0.285524	0.062	0.238	7.44464e-07
POMP	5.8752e-11	-0.259218	0.569	0.792	7.50616e-07
RAB1B	5.9069e-11	-0.183077	0.1	0.302	7.54665e-07
COX14	5.93183e-11	-0.168033	0.183	0.441	7.57851e-07
NDUFC2	5.99568e-11	-0.168265	0.115	0.329	7.66008e-07
FMN1	6.07647e-11	-0.194231	0.041	0.205	7.76329e-07
ARL5B	6.22705e-11	-0.168308	0.068	0.252	7.95569e-07
DDX49	6.23366e-11	-0.189436	0.121	0.337	7.96412e-07
PIN4	6.28798e-11	-0.1544	0.053	0.228	8.03352e-07
GMPR2	6.4376e-11	-0.19857	0.198	0.443	8.22468e-07
FCGRT	6.55617e-11	-0.317672	0.879	0.908	8.37616e-07
SLC12A9	6.6491e-11	-0.182708	0.227	0.495	8.49489e-07
TCN2	6.70391e-11	-0.268482	0.289	0.554	8.56492e-07
FADD	6.71473e-11	-0.143039	0.029	0.183	8.57874e-07
SURF4	6.82038e-11	-0.210819	0.26	0.525	8.71371e-07
ADI1	6.92086e-11	-0.176981	0.18	0.426	8.84209e-07
PLK2	7.31049e-11	-0.198302	0.077	0.265	9.33989e-07
CD1D	7.42433e-11	-0.190963	0.127	0.342	9.48533e-07
NDUFA9	7.60502e-11	-0.190045	0.142	0.364	9.71618e-07
ARFGAP1	7.62689e-11	-0.180802	0.168	0.416	9.74412e-07
MBD3	7.68029e-11	-0.181814	0.053	0.223	9.81233e-07
IFFO2	7.68767e-11	-0.16533	0.053	0.228	9.82177e-07
DNPH1	7.78536e-11	-0.237845	0.162	0.391	9.94658e-07
TAPSAR1	7.80754e-11	-0.203239	0.192	0.428	9.97491e-07
KBTBD2	7.85229e-11	-0.198741	0.221	0.473	1.00321e-06
ORAI2	7.92859e-11	-0.214257	0.186	0.428	1.01296e-06
LGALS3	7.95048e-11	-0.316549	0.755	0.832	1.01575e-06
SDHB	7.986e-11	-0.159011	0.324	0.644	1.02029e-06
MRPS16	8.00096e-11	-0.162911	0.097	0.295	1.0222e-06
CXCL1	8.04414e-11	-0.215279	0.006	0.131	1.02772e-06
PCK2	8.07021e-11	-0.202884	0.121	0.332	1.03105e-06
PPP4R2	8.13246e-11	-0.160069	0.156	0.401	1.039e-06
ZBTB7B	8.27873e-11	-0.157388	0.094	0.297	1.05769e-06
AP1M1	8.46206e-11	-0.170536	0.192	0.446	1.08111e-06
RTN4	8.46348e-11	-0.204417	0.953	0.983	1.08129e-06
KCNN4	8.66573e-11	-0.161853	0.041	0.203	1.10713e-06
ACLY	8.83787e-11	-0.195059	0.233	0.493	1.12913e-06
COX16	8.83881e-11	-0.176274	0.094	0.292	1.12925e-06
GRN	8.93983e-11	-0.289405	0.985	0.98	1.14215e-06
TUFM	9.09206e-11	-0.202974	0.339	0.631	1.1616e-06
PARL	9.14144e-11	-0.176662	0.162	0.401	1.16791e-06
NDUFA12	9.35558e-11	-0.20363	0.251	0.515	1.19527e-06
FBXO18	9.41691e-11	-0.187491	0.13	0.344	1.2031e-06
JADE1	9.55448e-11	0.147879	0.106	0.002	1.22068e-06
SIGLEC5	9.58153e-11	0.152942	0.106	0.002	1.22414e-06
DNAJC5	9.66323e-11	-0.202435	0.295	0.579	1.23457e-06
SDF2L1	9.71955e-11	-0.194897	0.091	0.287	1.24177e-06
PSMD13	9.88894e-11	-0.218751	0.319	0.597	1.26341e-06
HPCAL1	9.96568e-11	-0.225822	0.227	0.478	1.27322e-06
RBM18	1.0144e-10	-0.201661	0.115	0.319	1.296e-06
LARP7	1.02351e-10	-0.202581	0.289	0.554	1.30764e-06
LINC00984	1.036e-10	-0.184269	0.059	0.233	1.32359e-06
UNC93B1	1.03653e-10	-0.188609	0.366	0.673	1.32428e-06
RNF166	1.05482e-10	-0.175174	0.15	0.374	1.34764e-06
PMPCB	1.09938e-10	-0.151192	0.142	0.374	1.40457e-06
IGHA2	1.1049e-10	-0.120925	0.009	0.139	1.41162e-06
HPSE	1.11556e-10	-0.233789	0.183	0.413	1.42524e-06
UBA1	1.12746e-10	-0.207403	0.298	0.577	1.44045e-06
SNX8	1.18097e-10	-0.162609	0.056	0.23	1.50881e-06
DRAM1	1.19898e-10	-0.191502	0.209	0.453	1.53181e-06
C2orf15	1.21477e-10	-0.127859	0.024	0.168	1.55199e-06
UBAC2	1.24112e-10	-0.180823	0.206	0.458	1.58566e-06
FUCA1	1.24373e-10	-0.253421	0.168	0.394	1.58899e-06
RXRA	1.28282e-10	-0.258892	0.855	0.916	1.63893e-06
NDUFV2	1.30037e-10	-0.130273	0.015	0.149	1.66135e-06
MKI67IP	1.35122e-10	-0.150946	0.035	0.191	1.72632e-06
RNF41	1.35889e-10	-0.156548	0.083	0.272	1.73612e-06
NDUFAF3	1.42021e-10	-0.175147	0.183	0.426	1.81445e-06
SMARCE1	1.44937e-10	-0.182422	0.153	0.386	1.85172e-06
MAX	1.45607e-10	-0.191972	0.218	0.47	1.86028e-06
KLHL2	1.45737e-10	-0.155765	0.147	0.384	1.86194e-06
SIVA1	1.46675e-10	-0.184481	0.177	0.416	1.87392e-06
HSPA8	1.47168e-10	-0.273011	0.903	0.911	1.88022e-06
SLCO4A1	1.47856e-10	-0.13415	0	0.114	1.88901e-06
VPS16	1.55038e-10	-0.167854	0.121	0.329	1.98077e-06
COASY	1.56662e-10	-0.161057	0.115	0.324	2.00152e-06
HLA-DMB	1.57951e-10	-0.262906	0.236	0.48	2.01799e-06
KREMEN1	1.58112e-10	-0.169896	0.027	0.173	2.02004e-06
TOM1	1.59078e-10	-0.18081	0.192	0.438	2.03238e-06
HSPA1A	1.61509e-10	-0.222163	0.319	0.604	2.06345e-06
PPP1R12C	1.63813e-10	-0.201624	0.33	0.636	2.09287e-06
RABGGTB	1.68973e-10	-0.158259	0.127	0.347	2.15879e-06
CD99	1.70787e-10	-0.21127	0.162	0.389	2.18198e-06
SEC61A1	1.71496e-10	-0.170517	0.257	0.527	2.19103e-06
LTA4H	1.78772e-10	-0.347588	0.855	0.864	2.28399e-06
RAB9A	1.81403e-10	-0.158726	0.062	0.235	2.3176e-06
FKBP2	1.81877e-10	-0.187593	0.156	0.384	2.32366e-06
CBX6	1.83715e-10	-0.19956	0.177	0.413	2.34714e-06
TXN	1.85142e-10	-0.207785	0.195	0.433	2.36538e-06
FURIN	1.89401e-10	-0.181008	0.121	0.324	2.41979e-06
SFSWAP	1.91273e-10	-0.190585	0.23	0.495	2.4437e-06
PPP4R1	1.91869e-10	-0.182503	0.121	0.329	2.45132e-06
RNF169	1.92949e-10	-0.171332	0.124	0.339	2.46512e-06
NSFL1C	1.93035e-10	-0.188394	0.18	0.416	2.46622e-06
CHPT1	1.9397e-10	-0.185759	0.088	0.275	2.47816e-06
GPR35	1.97893e-10	-0.167352	0.044	0.205	2.52828e-06
GATAD1	2.00177e-10	-0.171584	0.127	0.339	2.55746e-06
ME1	2.03212e-10	-0.155277	0.021	0.158	2.59624e-06
TOLLIP	2.07929e-10	-0.205358	0.15	0.361	2.6565e-06
DERL2	2.10761e-10	-0.150698	0.118	0.327	2.69269e-06
DDOST	2.14283e-10	-0.181472	0.236	0.5	2.73768e-06
MBNL2	2.15389e-10	-0.16339	0.059	0.23	2.7518e-06
OSCAR	2.17229e-10	-0.192995	0.189	0.431	2.77531e-06
TFEC	2.23713e-10	-0.179813	0.127	0.342	2.85816e-06
COPS5	2.24816e-10	-0.173898	0.13	0.344	2.87225e-06
PLK3	2.29611e-10	-0.183325	0.091	0.282	2.93351e-06
ST13	2.30775e-10	-0.152907	0.183	0.428	2.94838e-06
CCNH	2.40175e-10	-0.151225	0.059	0.228	3.06847e-06
PA2G4	2.42216e-10	-0.173281	0.204	0.455	3.09455e-06
SEC61B	2.43785e-10	-0.18083	0.239	0.49	3.11459e-06
BCKDK	2.4474e-10	-0.178069	0.142	0.356	3.1268e-06
BLOC1S6	2.47142e-10	-0.204668	0.286	0.567	3.15748e-06
APMAP	2.50656e-10	-0.194068	0.23	0.485	3.20238e-06
PPP2R4	2.52789e-10	-0.164714	0.112	0.312	3.22963e-06
FBXW5	2.54415e-10	-0.252172	0.428	0.688	3.25041e-06
FAM105A	2.54966e-10	-0.202692	0.201	0.446	3.25745e-06
APH1A	2.56526e-10	-0.176392	0.201	0.446	3.27737e-06
TFIP11	2.61384e-10	-0.178114	0.088	0.277	3.33944e-06
BIRC3	2.63091e-10	-0.217097	0.254	0.515	3.36125e-06
CYB5R3	2.68123e-10	-0.164864	0.139	0.361	3.42554e-06
TRMT2A	2.72502e-10	-0.147915	0.065	0.243	3.48148e-06
FUOM	2.74091e-10	-0.143299	0.021	0.158	3.50179e-06
ZBTB16	2.74121e-10	-0.184065	0.038	0.191	3.50217e-06
PHPT1	2.76469e-10	-0.19231	0.198	0.428	3.53216e-06
RAB24	2.7712e-10	-0.156272	0.103	0.3	3.54049e-06
GPAA1	2.80516e-10	-0.211453	0.13	0.329	3.58387e-06
CHCHD2	2.81991e-10	-0.199603	0.372	0.663	3.60271e-06
EIF3M	2.84658e-10	-0.179433	0.26	0.53	3.6368e-06
EIF1B	2.91843e-10	-0.169426	0.083	0.265	3.72858e-06
MRPS6	2.94491e-10	-0.166537	0.088	0.28	3.76241e-06
TMEM167B	2.94898e-10	-0.196459	0.192	0.426	3.76762e-06
NAA15	2.95208e-10	-0.217462	0.209	0.436	3.77158e-06
PSMB4	2.96053e-10	-0.234973	0.664	0.809	3.78237e-06
DNAJC3	3.07113e-10	-0.167474	0.322	0.611	3.92368e-06
PSMB5	3.14397e-10	-0.173187	0.115	0.319	4.01674e-06
CLPTM1L	3.2629e-10	-0.153545	0.171	0.416	4.16868e-06
GCNT1	3.26756e-10	-0.21405	0.121	0.314	4.17463e-06
CIDEB	3.29052e-10	-0.158626	0.041	0.193	4.20397e-06
EMC7	3.3256e-10	-0.160771	0.254	0.525	4.24879e-06
GALNT1	3.35206e-10	-0.210765	0.313	0.587	4.28259e-06
PDIA6	3.35614e-10	-0.323883	0.584	0.74	4.2878e-06
ANXA4	3.35874e-10	-0.200197	0.295	0.574	4.29113e-06
AIM1	3.40742e-10	-0.204977	0.283	0.545	4.35332e-06
CXCL16	3.43479e-10	-0.195048	0.283	0.567	4.38829e-06
SMDT1	3.51145e-10	-0.190485	0.221	0.455	4.48623e-06
BCAS2	3.51509e-10	-0.174908	0.086	0.27	4.49088e-06
TRAF7	3.53478e-10	-0.147549	0.05	0.213	4.51603e-06
TAF10	3.55284e-10	-0.177026	0.351	0.653	4.53911e-06
LAMTOR3	3.55424e-10	-0.159969	0.109	0.309	4.5409e-06
THEMIS2	3.59268e-10	-0.273315	0.802	0.869	4.59e-06
FAM173A	3.66704e-10	-0.171678	0.1	0.295	4.68502e-06
RARS	3.69752e-10	-0.175716	0.13	0.339	4.72395e-06
C12orf57	3.77979e-10	-0.146598	0.109	0.314	4.82906e-06
FAM21A	3.80627e-10	0.251621	0.251	0.089	4.86289e-06
TRMT10C	3.81741e-10	-0.141255	0.038	0.191	4.87713e-06
EMC3	3.8284e-10	-0.161701	0.18	0.418	4.89117e-06
GSS	3.84309e-10	-0.18126	0.071	0.245	4.90993e-06
PPCS	3.86028e-10	-0.162911	0.212	0.463	4.93189e-06
DPYD	4.01902e-10	-0.229454	0.345	0.609	5.1347e-06
MFF	4.0479e-10	-0.200197	0.159	0.366	5.1716e-06
NEDD8	4.05606e-10	-0.221986	0.726	0.854	5.18202e-06
TXNRD1	4.05766e-10	-0.210466	0.31	0.587	5.18406e-06
SLC35A4	4.0773e-10	-0.161747	0.136	0.349	5.20915e-06
FAM104A	4.08837e-10	-0.146436	0.077	0.257	5.22331e-06
UFD1L	4.12364e-10	-0.152008	0.195	0.441	5.26837e-06
NDFIP1	4.13287e-10	-0.160003	0.327	0.616	5.28016e-06
POLR2C	4.13293e-10	-0.182482	0.136	0.344	5.28023e-06
CD84	4.22527e-10	-0.216627	0.239	0.488	5.3982e-06
ENY2	4.35613e-10	-0.204807	0.386	0.656	5.56539e-06
TM2D3	4.39048e-10	-0.154992	0.083	0.265	5.60928e-06
MPPE1	4.45881e-10	-0.147071	0.038	0.191	5.69657e-06
SLC3A2	4.64512e-10	-0.257536	0.475	0.693	5.9346e-06
ST3GAL1	4.66447e-10	-0.269227	0.357	0.606	5.95933e-06
ITGA4	4.67228e-10	0.248199	0.932	0.723	5.96931e-06
NDUFA10	4.69611e-10	-0.168009	0.215	0.468	5.99975e-06
ADAM15	4.69919e-10	-0.200197	0.136	0.342	6.00369e-06
SHC1	4.73969e-10	-0.150567	0.112	0.312	6.05543e-06
ACOX1	4.80171e-10	-0.181756	0.127	0.332	6.13466e-06
TPD52L2	4.86757e-10	-0.18852	0.307	0.584	6.21881e-06
C19orf70	4.96977e-10	-0.169529	0.136	0.344	6.34938e-06
AHCY	5.00828e-10	-0.153739	0.15	0.369	6.39858e-06
MERTK	5.03222e-10	-0.217257	0.186	0.416	6.42916e-06
COPE	5.09364e-10	-0.176346	0.153	0.366	6.50763e-06
LAMTOR5	5.1369e-10	-0.196582	0.342	0.629	6.5629e-06
SURF1	5.14898e-10	-0.181717	0.189	0.421	6.57834e-06
SERF2	5.20394e-10	-0.188957	0.994	0.993	6.64855e-06
RUNX1	5.23256e-10	-0.188624	0.227	0.465	6.68512e-06
PLEKHB2	5.28053e-10	-0.267108	0.614	0.775	6.7464e-06
DCTN3	5.28573e-10	-0.18319	0.227	0.47	6.75305e-06
MON1B	5.30996e-10	-0.170366	0.174	0.411	6.784e-06
CCAR1	5.45276e-10	-0.204517	0.215	0.458	6.96645e-06
PSMD14	5.50423e-10	-0.186033	0.15	0.366	7.0322e-06
N4BP2L2	5.54901e-10	-0.209585	0.31	0.587	7.08941e-06
HLA-DQB2	5.60773e-10	-0.136468	0.021	0.153	7.16443e-06
TBCB	5.64091e-10	-0.210856	0.307	0.567	7.20683e-06
TSR3	5.66719e-10	-0.180305	0.156	0.374	7.2404e-06
KRT10	5.69518e-10	-0.173498	0.103	0.295	7.27617e-06
DAPK3	5.80406e-10	-0.152664	0.077	0.255	7.41526e-06
GADD45GIP1	5.81918e-10	-0.207204	0.26	0.5	7.43458e-06
AIFM1	5.82079e-10	-0.175791	0.091	0.275	7.43665e-06
NFKB1	5.84667e-10	-0.18577	0.289	0.572	7.4697e-06
SUMO1	5.8722e-10	-0.157932	0.15	0.366	7.50233e-06
NTAN1	5.89513e-10	-0.194423	0.124	0.324	7.53161e-06
TBRG1	5.92063e-10	-0.165719	0.159	0.381	7.5642e-06
FPR1	5.9621e-10	-0.300917	0.92	0.894	7.61718e-06
POLD4	6.02961e-10	-0.138654	0.059	0.23	7.70344e-06
RASGEF1B	6.1111e-10	-0.281106	0.522	0.715	7.80754e-06
SLC35D2	6.15779e-10	-0.15449	0.068	0.24	7.86719e-06
C6orf25	6.1817e-10	-0.147258	0.009	0.129	7.89775e-06
CXorf21	6.44396e-10	-0.179199	0.153	0.371	8.2328e-06
GAS2L1	6.5073e-10	-0.139899	0.024	0.158	8.31372e-06
IGF2R	6.5651e-10	-0.303478	0.696	0.782	8.38757e-06
SPPL2A	6.56748e-10	-0.167454	0.162	0.386	8.39062e-06
EIF2B5	6.66539e-10	-0.180289	0.145	0.356	8.5157e-06
RHOQ	6.84648e-10	-0.210473	0.324	0.592	8.74707e-06
PRPF31	6.94212e-10	-0.169837	0.127	0.332	8.86926e-06
TFPT	7.0552e-10	-0.144326	0.032	0.176	9.01372e-06
RGCC	7.13412e-10	-0.229142	0.056	0.215	9.11455e-06
BAP1	7.14788e-10	-0.173929	0.109	0.302	9.13214e-06
MPP1	7.24868e-10	-0.170769	0.286	0.567	9.26091e-06
MAP2K2	7.27276e-10	-0.180559	0.18	0.399	9.29168e-06
FBL	7.31977e-10	-0.187213	0.224	0.47	9.35173e-06
RENBP	7.32834e-10	-0.135668	0.041	0.193	9.36269e-06
VIMP	7.45931e-10	-0.193162	0.201	0.438	9.53001e-06
2020-03-02	7.48648e-10	-0.176248	0.168	0.384	9.56473e-06
JKAMP	7.51184e-10	-0.154366	0.133	0.342	9.59713e-06
SESN1	7.61795e-10	-0.172421	0.074	0.245	9.7327e-06
FAM134A	7.69036e-10	-0.180592	0.204	0.433	9.82521e-06
NCK2	7.74732e-10	-0.144016	0.068	0.238	9.89798e-06
AHNAK	7.80217e-10	0.277351	0.985	0.943	9.96806e-06
DERA	7.89184e-10	-0.141103	0.077	0.252	1.00826e-05
CERS2	8.03122e-10	-0.165831	0.162	0.376	1.02607e-05
TFE3	8.2398e-10	-0.174457	0.147	0.356	1.05272e-05
ANAPC7	8.24254e-10	-0.154158	0.074	0.248	1.05307e-05
IVNS1ABP	8.25636e-10	-0.169111	0.257	0.525	1.05483e-05
PLOD3	8.40656e-10	-0.181021	0.15	0.364	1.07402e-05
BTG3	8.5989e-10	-0.129967	0.024	0.158	1.0986e-05
DDX27	8.61144e-10	-0.172517	0.218	0.468	1.1002e-05
TLR8	8.92181e-10	-0.189785	0.304	0.577	1.13985e-05
ZDHHC3	8.92667e-10	-0.151746	0.198	0.446	1.14047e-05
NUDT9	8.95256e-10	-0.159541	0.077	0.25	1.14378e-05
ADIPOR1	8.98638e-10	-0.161708	0.189	0.418	1.1481e-05
PDCD6	9.01407e-10	-0.199149	0.26	0.512	1.15164e-05
KCMF1	9.13389e-10	-0.19031	0.23	0.475	1.16695e-05
HEXDC	9.14252e-10	-0.148783	0.05	0.208	1.16805e-05
DNAJB12	9.23016e-10	-0.146896	0.177	0.413	1.17925e-05
MAD1L1	9.39333e-10	-0.159617	0.115	0.312	1.20009e-05
DCTN4	9.49164e-10	-0.160674	0.077	0.25	1.21265e-05
FBXO11	9.51113e-10	-0.2035	0.215	0.448	1.21514e-05
ELAC2	9.64387e-10	-0.164243	0.136	0.339	1.2321e-05
DLD	9.69011e-10	-0.137819	0.18	0.426	1.23801e-05
NFATC3	9.74468e-10	-0.156392	0.121	0.322	1.24498e-05
RTCB	9.77621e-10	-0.198011	0.209	0.436	1.24901e-05
AGTPBP1	9.77931e-10	-0.164567	0.183	0.411	1.2494e-05
POLDIP3	9.87682e-10	-0.151421	0.162	0.389	1.26186e-05
LINC00963	9.92485e-10	-0.168712	0.115	0.312	1.268e-05
PRADC1	1.00659e-09	-0.155593	0.062	0.225	1.28602e-05
IL10	1.01263e-09	-0.190045	0.003	0.111	1.29373e-05
JADE2	1.04496e-09	0.140585	0.109	0.007	1.33504e-05
LEPROT	1.04717e-09	-0.172026	0.286	0.564	1.33787e-05
USF2	1.05236e-09	-0.207114	0.41	0.668	1.3445e-05
ITM2C	1.06888e-09	-0.118825	0.006	0.119	1.36561e-05
CD9	1.08518e-09	-0.169896	0.032	0.173	1.38643e-05
SEC11C	1.08551e-09	-0.160353	0.13	0.332	1.38685e-05
FEM1A	1.11121e-09	-0.125115	0.024	0.156	1.41969e-05
DOK1	1.13186e-09	-0.174413	0.153	0.366	1.44607e-05
GPR162	1.13226e-09	-0.153968	0.056	0.215	1.44657e-05
KIAA0247	1.15103e-09	-0.153902	0.292	0.592	1.47056e-05
YBX1	1.16578e-09	0.251138	0.988	0.923	1.4894e-05
WDR45B	1.17612e-09	-0.183416	0.174	0.384	1.50261e-05
CLPX	1.18874e-09	-0.171285	0.133	0.332	1.51874e-05
U2AF2	1.22353e-09	-0.177865	0.145	0.354	1.56318e-05
KSR1	1.22878e-09	-0.183219	0.201	0.433	1.56989e-05
WBP4	1.22931e-09	-0.173197	0.086	0.265	1.57056e-05
UBE2M	1.25718e-09	-0.141564	0.068	0.235	1.60617e-05
KLHDC3	1.25891e-09	-0.162197	0.083	0.257	1.60839e-05
GTF3C5	1.26488e-09	-0.149446	0.115	0.312	1.61601e-05
PPTC7	1.27144e-09	-0.210166	0.239	0.483	1.62439e-05
TAGLN2	1.29578e-09	-0.286321	0.525	0.735	1.65549e-05
JSRP1	1.31514e-09	-0.108689	0.015	0.139	1.68023e-05
RNF141	1.37055e-09	-0.18582	0.292	0.567	1.75101e-05
FIG4	1.40027e-09	-0.151561	0.103	0.295	1.78899e-05
HARS2	1.42711e-09	-0.160266	0.059	0.215	1.82328e-05
TFRC	1.45729e-09	-0.243191	0.26	0.5	1.86183e-05
UQCRH	1.45781e-09	-0.23053	0.59	0.782	1.8625e-05
APRT	1.47238e-09	-0.177742	0.236	0.488	1.88111e-05
ALYREF	1.47906e-09	-0.141733	0.15	0.364	1.88964e-05
RGS2	1.48389e-09	-0.340447	0.864	0.869	1.89582e-05
PSMD8	1.51774e-09	-0.171968	0.357	0.653	1.93906e-05
SLC36A4	1.53728e-09	-0.154158	0.074	0.243	1.96403e-05
HIF1A	1.54292e-09	-0.243296	0.304	0.562	1.97124e-05
CCND3	1.5523e-09	-0.244102	0.767	0.847	1.98322e-05
MYLIP	1.58277e-09	-0.162304	0.183	0.403	2.02214e-05
MYEOV2	1.58789e-09	-0.176496	0.257	0.515	2.02868e-05
BZW2	1.60387e-09	-0.142061	0.068	0.235	2.0491e-05
GPN1	1.65054e-09	-0.14427	0.071	0.238	2.10872e-05
IL18BP	1.65561e-09	-0.142783	0.044	0.191	2.1152e-05
SLC25A6	1.67377e-09	-0.189735	0.956	0.95	2.13841e-05
KCTD20	1.68846e-09	-0.239864	0.271	0.515	2.15718e-05
MAD2L2	1.71318e-09	-0.150882	0.086	0.262	2.18876e-05
LRG1	1.78344e-09	-0.164263	0.029	0.166	2.27853e-05
MEPCE	1.80905e-09	-0.138139	0.062	0.225	2.31124e-05
RBBP4	1.83529e-09	-0.185292	0.13	0.319	2.34477e-05
UBE2H	1.83594e-09	-0.170701	0.192	0.423	2.3456e-05
PSMC2	1.8452e-09	-0.173961	0.307	0.592	2.35743e-05
BST1	1.85527e-09	-0.138075	0.186	0.421	2.37029e-05
ZDHHC20	1.86954e-09	-0.178757	0.186	0.411	2.38853e-05
OGFR	1.87564e-09	-0.17665	0.277	0.525	2.39631e-05
B3GNT5	1.88498e-09	-0.133984	0.029	0.166	2.40825e-05
RBM3	1.91743e-09	-0.201136	0.826	0.899	2.4497e-05
RAB3D	1.92093e-09	-0.144553	0.224	0.468	2.45418e-05
NUP62	1.92158e-09	-0.177458	0.271	0.53	2.45501e-05
UBE3A	1.94636e-09	-0.170501	0.307	0.569	2.48667e-05
SLC25A16	1.98396e-09	-0.123631	0.024	0.153	2.5347e-05
MAPK6	1.98726e-09	-0.196855	0.18	0.396	2.53892e-05
GALNT2	1.98899e-09	-0.164606	0.18	0.408	2.54113e-05
PREB	2.03197e-09	-0.142138	0.127	0.327	2.59604e-05
PPP1R11	2.04071e-09	-0.156307	0.159	0.376	2.60721e-05
TNFAIP8	2.08408e-09	-0.17121	0.227	0.47	2.66262e-05
SFT2D1	2.0957e-09	-0.182564	0.227	0.46	2.67747e-05
SKP1	2.15054e-09	-0.201259	0.434	0.691	2.74753e-05
IREB2	2.1797e-09	-0.191965	0.209	0.433	2.78479e-05
C1orf27	2.22742e-09	-0.144496	0.065	0.228	2.84575e-05
SH3TC1	2.24088e-09	-0.17387	0.168	0.379	2.86295e-05
CPD	2.28339e-09	-0.157544	0.189	0.416	2.91726e-05
CD82	2.31644e-09	-0.170444	0.13	0.327	2.95948e-05
CS	2.33933e-09	-0.142616	0.159	0.376	2.98873e-05
MSRB2	2.35039e-09	-0.162887	0.1	0.282	3.00285e-05
APOL1	2.35594e-09	-0.187586	0.209	0.436	3.00995e-05
ZNF710	2.36877e-09	-0.144172	0.115	0.309	3.02634e-05
TMEM33	2.37148e-09	-0.145196	0.221	0.458	3.02981e-05
TMEM208	2.39492e-09	-0.152717	0.171	0.386	3.05975e-05
ANAPC16	2.40837e-09	-0.161957	0.227	0.478	3.07693e-05
YPEL2	2.42924e-09	-0.198519	0.245	0.493	3.1036e-05
HLA-DRA	2.4324e-09	-0.325508	0.982	0.975	3.10763e-05
PAFAH1B1	2.43314e-09	-0.197222	0.389	0.666	3.10857e-05
RNMT	2.43536e-09	-0.171909	0.153	0.359	3.11142e-05
LAMTOR4	2.4389e-09	-0.183126	0.386	0.671	3.11594e-05
SNX4	2.50237e-09	-0.160694	0.112	0.3	3.19703e-05
LAMC1	2.51512e-09	-0.113	0.006	0.114	3.21332e-05
SDR39U1	2.53842e-09	-0.131478	0.021	0.146	3.24308e-05
LAMTOR2	2.57692e-09	-0.141733	0.142	0.349	3.29227e-05
TMEM43	2.63151e-09	-0.162777	0.133	0.334	3.36202e-05
NPEPPS	2.64223e-09	-0.179231	0.189	0.411	3.37571e-05
AGPAT2	2.64708e-09	-0.151269	0.103	0.292	3.38191e-05
C17orf89	2.67034e-09	-0.148705	0.088	0.265	3.41162e-05
PSMC3	2.682e-09	-0.183444	0.304	0.594	3.42653e-05
NLN	2.70147e-09	-0.1788	0.124	0.314	3.4514e-05
HMGCR	2.71224e-09	-0.176646	0.112	0.295	3.46516e-05
ICMT	2.71578e-09	-0.135545	0.133	0.342	3.46969e-05
DPH3	2.71908e-09	-0.156307	0.153	0.364	3.47389e-05
TMED4	2.77142e-09	-0.15647	0.183	0.408	3.54077e-05
METTL9	2.7912e-09	-0.167274	0.257	0.507	3.56603e-05
GNPDA1	2.80309e-09	-0.18057	0.162	0.376	3.58123e-05
PSMG1	2.83535e-09	-0.130261	0.041	0.186	3.62244e-05
PIK3IP1	2.83807e-09	-0.207236	0.121	0.309	3.62592e-05
ZDHHC6	2.84264e-09	-0.163976	0.106	0.29	3.63175e-05
GRIPAP1	2.85863e-09	-0.186375	0.159	0.366	3.65219e-05
FIS1	2.86284e-09	-0.162113	0.133	0.332	3.65757e-05
ABCA1	2.87204e-09	-0.282625	0.212	0.428	3.66932e-05
SRSF6	2.88026e-09	-0.17119	0.277	0.55	3.67982e-05
LAPTM4A	2.89479e-09	-0.216701	0.631	0.79	3.69838e-05
LACC1	2.90432e-09	-0.197208	0.168	0.369	3.71056e-05
H1FX	2.92399e-09	-0.290738	0.413	0.646	3.73569e-05
MAN2B1	2.94967e-09	-0.174461	0.242	0.488	3.76849e-05
ZNF259	2.98484e-09	-0.182194	0.177	0.389	3.81343e-05
COA6	2.98564e-09	-0.171236	0.115	0.3	3.81446e-05
GIMAP4	2.99859e-09	0.263578	0.867	0.705	3.831e-05
RAD23A	3.00418e-09	-0.148329	0.245	0.505	3.83814e-05
NACA2	3.00692e-09	0.150904	0.136	0.022	3.84164e-05
AHSA1	3.01332e-09	-0.169888	0.201	0.423	3.84981e-05
BIN3	3.01534e-09	-0.145821	0.047	0.193	3.85239e-05
NAA50	3.07568e-09	-0.224681	0.286	0.52	3.92949e-05
EIF3B	3.08249e-09	-0.143393	0.265	0.522	3.93818e-05
ACSL3	3.09027e-09	-0.16722	0.15	0.356	3.94813e-05
YIF1A	3.09302e-09	-0.151269	0.106	0.295	3.95165e-05
EIF5AL1	3.11663e-09	0.153109	0.109	0.01	3.98181e-05
ISCU	3.13049e-09	-0.179926	0.204	0.431	3.99952e-05
NDUFV1	3.15538e-09	-0.18346	0.209	0.438	4.03131e-05
NPC2	3.16359e-09	-0.21469	0.926	0.946	4.0418e-05
NGDN	3.18608e-09	-0.173961	0.1	0.277	4.07053e-05
RN7SL3	3.20972e-09	0.145487	0.103	0.007	4.10074e-05
RILPL2	3.21926e-09	-0.241136	0.782	0.854	4.11293e-05
RFX5	3.25127e-09	-0.164366	0.1	0.28	4.15382e-05
MAP1LC3B	3.34101e-09	-0.203569	0.454	0.715	4.26848e-05
KIAA2013	3.36349e-09	-0.166335	0.133	0.329	4.2972e-05
2020-03-05	3.37303e-09	-0.152642	0.053	0.2	4.30938e-05
MAPK3	3.4173e-09	-0.158817	0.094	0.27	4.36594e-05
CCL4	3.42784e-09	-0.247262	0.053	0.203	4.3794e-05
CMPK1	3.42794e-09	-0.147126	0.195	0.418	4.37954e-05
ASL	3.44729e-09	-0.150164	0.041	0.181	4.40426e-05
SIRT2	3.48459e-09	-0.159005	0.145	0.349	4.45191e-05
GUCD1	3.52354e-09	-0.154827	0.142	0.349	4.50168e-05
RAB5C	3.5322e-09	-0.178927	0.295	0.55	4.51274e-05
SHMT2	3.64065e-09	-0.136318	0.083	0.255	4.65129e-05
PTPRC	3.68546e-09	0.17831	1	1	4.70855e-05
ACRBP	3.69264e-09	-0.150628	0.038	0.178	4.71771e-05
JAZF1	3.69987e-09	-0.174179	0.145	0.342	4.72696e-05
GTF2B	3.70963e-09	-0.150419	0.127	0.322	4.73942e-05
GPI	3.72749e-09	-0.171965	0.286	0.54	4.76225e-05
MEF2D	3.73964e-09	-0.180523	0.136	0.329	4.77776e-05
AP2S1	3.81007e-09	-0.2525	0.531	0.723	4.86774e-05
COQ10B	3.84583e-09	-0.159686	0.145	0.351	4.91343e-05
CD40	3.92078e-09	-0.145593	0.097	0.277	5.00919e-05
SAR1B	3.94551e-09	-0.14827	0.139	0.337	5.04078e-05
SIL1	3.98952e-09	-0.139038	0.1	0.28	5.09701e-05
ZBTB21	3.99547e-09	-0.190763	0.115	0.3	5.10461e-05
TUBGCP2	4.00259e-09	-0.150008	0.251	0.512	5.11371e-05
ZC3H7A	4.00697e-09	-0.182774	0.218	0.45	5.1193e-05
SLC4A7	4.03163e-09	-0.171408	0.044	0.186	5.1508e-05
GNB1	4.03217e-09	-0.182209	0.971	0.97	5.1515e-05
MAPK14	4.03902e-09	-0.166957	0.271	0.517	5.16025e-05
SLC46A1	4.07607e-09	-0.171408	0.038	0.176	5.20759e-05
EIF2AK1	4.1003e-09	-0.160247	0.28	0.554	5.23854e-05
SPINT2	4.16092e-09	-0.161821	0.083	0.248	5.31599e-05
PITPNC1	4.32151e-09	-0.148893	0.183	0.413	5.52117e-05
TMEM14B	4.32444e-09	-0.150144	0.139	0.339	5.52491e-05
DRAM2	4.3369e-09	-0.161723	0.174	0.386	5.54083e-05
AMDHD2	4.36133e-09	-0.143798	0.041	0.183	5.57203e-05
TOX4	4.44737e-09	-0.155996	0.233	0.47	5.68196e-05
CCT5	4.49389e-09	-0.236253	0.649	0.819	5.74139e-05
UBL5	4.56098e-09	-0.218679	0.658	0.812	5.8271e-05
PHYKPL	4.57338e-09	-0.175087	0.201	0.431	5.84295e-05
IL6ST	4.58915e-09	-0.234402	0.286	0.53	5.86309e-05
MRPS5	4.67631e-09	-0.1953	0.248	0.488	5.97445e-05
LSMD1	4.75969e-09	-0.162265	0.239	0.478	6.08098e-05
SMAP1	4.78677e-09	-0.135915	0.109	0.295	6.11557e-05
FAM219B	4.80242e-09	-0.158429	0.086	0.252	6.13557e-05
GTPBP4	4.85766e-09	-0.181717	0.177	0.389	6.20615e-05
CCDC59	4.86538e-09	-0.153564	0.147	0.351	6.21601e-05
BST2	4.93095e-09	-0.198198	0.31	0.559	6.29978e-05
PURB	4.95541e-09	-0.168963	0.192	0.411	6.33103e-05
SNHG16	5.02741e-09	-0.13656	0.056	0.208	6.42302e-05
CIR1	5.10324e-09	-0.156516	0.274	0.535	6.51989e-05
GTF2F2	5.10835e-09	-0.154992	0.086	0.252	6.52643e-05
SUSD1	5.122e-09	-0.20795	0.257	0.48	6.54387e-05
MARS	5.12214e-09	-0.163617	0.186	0.401	6.54405e-05
PPM1M	5.13733e-09	-0.144069	0.189	0.411	6.56345e-05
IFFO1	5.20023e-09	-0.175068	0.133	0.324	6.64381e-05
PIGS	5.2298e-09	-0.149481	0.153	0.359	6.68159e-05
BAK1	5.24018e-09	-0.13111	0.056	0.208	6.69486e-05
SLK	5.30226e-09	-0.223858	0.304	0.547	6.77417e-05
USP47	5.33009e-09	-0.171987	0.263	0.5	6.80972e-05
EIF4E2	5.41882e-09	-0.166614	0.348	0.634	6.92308e-05
ATXN1	5.49269e-09	-0.156615	0.136	0.334	7.01746e-05
PDCD2	5.52244e-09	-0.150517	0.162	0.379	7.05547e-05
CRK	5.68906e-09	-0.171456	0.189	0.403	7.26835e-05
SLC35E4	5.73805e-09	-0.117298	0.018	0.136	7.33094e-05
C19orf60	5.80675e-09	-0.173556	0.198	0.416	7.4187e-05
METTL23	5.86828e-09	-0.126023	0.044	0.188	7.49732e-05
PSMB1	5.87354e-09	-0.202874	0.749	0.842	7.50403e-05
CLK1	5.89391e-09	-0.166921	0.333	0.606	7.53005e-05
TRAP1	5.95323e-09	-0.132552	0.053	0.2	7.60585e-05
ZFYVE21	5.97865e-09	-0.161452	0.056	0.203	7.63832e-05
EMD	5.98675e-09	-0.152664	0.077	0.24	7.64867e-05
SNHG15	5.99148e-09	-0.172193	0.142	0.342	7.65471e-05
DAZAP1	6.0359e-09	-0.183436	0.274	0.527	7.71146e-05
METRNL	6.11318e-09	-0.238281	0.622	0.762	7.8102e-05
COA3	6.11494e-09	-0.149734	0.136	0.332	7.81244e-05
ELOF1	6.33581e-09	-0.153978	0.136	0.329	8.09463e-05
FKBP1C	6.37982e-09	0.143194	0.112	0.012	8.15086e-05
TP53I3	6.40441e-09	-0.149705	0.056	0.205	8.18228e-05
TMEM205	6.4581e-09	-0.15607	0.13	0.322	8.25086e-05
RHEB	6.48503e-09	-0.155942	0.118	0.297	8.28528e-05
CERS6	6.61335e-09	-0.191021	0.159	0.354	8.44922e-05
CHMP4A	6.65485e-09	-0.126372	0.029	0.158	8.50224e-05
SPN	6.68141e-09	0.313069	0.861	0.644	8.53617e-05
SDE2	6.7816e-09	-0.13369	0.077	0.243	8.66417e-05
RIPK3	6.80436e-09	-0.146237	0.059	0.21	8.69325e-05
AGO2	6.80819e-09	-0.13574	0.106	0.29	8.69814e-05
AHCYL1	6.82427e-09	-0.161782	0.339	0.614	8.71868e-05
INO80	6.83189e-09	-0.175637	0.171	0.376	8.72842e-05
COPB2	6.84292e-09	-0.172026	0.316	0.587	8.74252e-05
HGS	6.88961e-09	-0.133156	0.086	0.255	8.80216e-05
FUNDC2	6.90219e-09	-0.163956	0.212	0.433	8.81823e-05
HMHA1	6.90441e-09	-0.206249	0.687	0.837	8.82108e-05
MLST8	6.92032e-09	-0.10791	0.015	0.129	8.8414e-05
SEC23B	6.94744e-09	-0.161756	0.139	0.337	8.87605e-05
TLK1	6.95292e-09	-0.163413	0.15	0.354	8.88305e-05
MVP	6.97839e-09	-0.223162	0.755	0.837	8.91559e-05
TOR4A	7.01444e-09	-0.147447	0.109	0.29	8.96165e-05
CDK4	7.17104e-09	-0.129074	0.032	0.163	9.16172e-05
WDR33	7.29389e-09	-0.15623	0.177	0.391	9.31868e-05
GTF2A2	7.32275e-09	-0.174143	0.174	0.376	9.35554e-05
RNPEPL1	7.3379e-09	-0.147795	0.324	0.599	9.3749e-05
ERBB2IP	7.40356e-09	0.253325	0.811	0.644	9.45879e-05
ATG16L2	7.72071e-09	-0.163382	0.236	0.475	9.86398e-05
INO80E	7.83373e-09	-0.124371	0.027	0.151	0.000100084
TNNT1	7.84923e-09	-0.180453	0.056	0.203	0.000100282
SMIM14	7.85005e-09	-0.169611	0.189	0.408	0.000100292
NDUFS2	7.99016e-09	-0.175511	0.251	0.485	0.000102082
ZNF511	8.0349e-09	-0.134399	0.103	0.282	0.000102654
SLC31A1	8.08353e-09	-0.158301	0.227	0.463	0.000103275
CALR	8.08966e-09	-0.362067	0.735	0.79	0.000103354
UBL3	8.21471e-09	-0.183249	0.224	0.443	0.000104951
BAD	8.22048e-09	-0.112963	0.038	0.176	0.000105025
TUSC2	8.26393e-09	-0.130379	0.086	0.255	0.00010558
BTN2A1	8.28893e-09	-0.17058	0.171	0.376	0.000105899
ZNF598	8.29985e-09	-0.136758	0.059	0.208	0.000106039
HIF1AN	8.41808e-09	-0.144971	0.074	0.235	0.000107549
TSG101	8.42964e-09	-0.141708	0.142	0.337	0.000107697
RCHY1	8.58023e-09	-0.139666	0.071	0.23	0.000109621
FUCA2	8.59983e-09	-0.18823	0.298	0.559	0.000109871
ARRDC1	8.68318e-09	-0.127444	0.077	0.238	0.000110936
QARS	8.71375e-09	-0.176952	0.307	0.567	0.000111327
HEXA	8.87208e-09	-0.170255	0.136	0.322	0.00011335
HCP5	8.96536e-09	-0.154663	0.086	0.25	0.000114541
MIIP	9.02734e-09	-0.120788	0.127	0.317	0.000115333
MARVELD1	9.11097e-09	-0.150008	0.053	0.198	0.000116402
AMD1	9.16516e-09	-0.150882	0.265	0.515	0.000117094
AQP9	9.23309e-09	-0.199477	0.416	0.666	0.000117962
RELL2	9.24365e-09	-0.128129	0.015	0.126	0.000118097
MRPL12	9.30532e-09	-0.121996	0.047	0.188	0.000118885
HTRA2	9.32843e-09	-0.100358	0.029	0.158	0.00011918
HAX1	9.47342e-09	-0.169426	0.162	0.364	0.000121032
C14orf2	9.47439e-09	-0.158543	0.277	0.522	0.000121045
CRBN	9.49601e-09	-0.147607	0.15	0.349	0.000121321
ITGB1BP1	9.5733e-09	-0.165666	0.183	0.394	0.000122308
ANAPC11	9.62469e-09	-0.149265	0.301	0.562	0.000122965
TEX264	9.76254e-09	-0.170032	0.147	0.342	0.000124726
CLIP4	9.79127e-09	-0.182872	0.18	0.389	0.000125093
NAP1L1	9.85206e-09	0.314776	0.941	0.797	0.00012587
CORO7	9.91303e-09	-0.132274	0.162	0.374	0.000126649
VPS37B	9.97819e-09	-0.151358	0.071	0.225	0.000127481
CPNE1	1.00433e-08	-0.142665	0.224	0.468	0.000128314
CSNK2A1	1.00454e-08	-0.140745	0.23	0.468	0.00012834
PSMC5	1.01089e-08	-0.205583	0.407	0.646	0.000129151
PRKACA	1.01222e-08	-0.132757	0.224	0.46	0.000129321
CPQ	1.02098e-08	-0.165736	0.121	0.302	0.00013044
ENTPD1	1.02319e-08	-0.185937	0.186	0.394	0.000130722
PYCR2	1.03001e-08	-0.131216	0.086	0.252	0.000131594
SNX20	1.03467e-08	-0.141788	0.254	0.495	0.00013219
DAP3	1.03634e-08	-0.136289	0.221	0.455	0.000132402
CARS2	1.03694e-08	-0.166512	0.195	0.411	0.000132479
OIP5-AS1	1.05117e-08	-0.153919	0.236	0.473	0.000134297
P2RY1	1.0579e-08	-0.117255	0.021	0.139	0.000135158
BLOC1S1	1.06476e-08	-0.189811	0.295	0.542	0.000136033
FAM160A2	1.06929e-08	-0.119093	0.05	0.193	0.000136613
RAB27A	1.07543e-08	-0.167393	0.204	0.431	0.000137397
LST1	1.07834e-08	0.232171	0.982	0.953	0.000137769
DYNLT1	1.09396e-08	-0.201369	0.204	0.411	0.000139765
GIT2	1.09546e-08	-0.146386	0.209	0.441	0.000139956
BOLA2B	1.10655e-08	0.133172	0.115	0.015	0.000141373
SMG5	1.1109e-08	-0.165345	0.121	0.302	0.000141928
CPEB4	1.12055e-08	-0.164158	0.206	0.426	0.000143162
TCP1	1.13642e-08	-0.18834	0.345	0.597	0.00014519
MLXIP	1.14456e-08	-0.172754	0.156	0.351	0.000146229
METTL7B	1.15958e-08	-0.197199	0.041	0.176	0.000148148
PAPD5	1.18257e-08	-0.153278	0.159	0.359	0.000151085
PDCD10	1.18505e-08	-0.165756	0.206	0.423	0.000151402
GRAMD4	1.20969e-08	-0.149246	0.059	0.205	0.000154551
IKBKE	1.22847e-08	-0.144753	0.065	0.218	0.000156949
CTNNB1	1.23314e-08	-0.237211	0.431	0.656	0.000157546
HAGH	1.25457e-08	-0.148825	0.156	0.361	0.000160284
GIMAP1	1.26148e-08	-0.206841	0.268	0.49	0.000161167
HINT1	1.26546e-08	-0.146339	0.174	0.386	0.000161675
GUSB	1.27042e-08	-0.22631	0.472	0.688	0.000162309
HMGCS1	1.27278e-08	-0.152882	0.094	0.26	0.00016261
CD81	1.27681e-08	-0.197006	0.26	0.498	0.000163125
B4GALT1	1.29292e-08	-0.137049	0.298	0.564	0.000165183
VKORC1	1.29398e-08	-0.14212	0.121	0.302	0.000165318
TERF2IP	1.30081e-08	-0.183242	0.386	0.641	0.000166191
SLC28A3	1.31042e-08	-0.208341	0.032	0.158	0.000167419
GM2A	1.31886e-08	-0.20419	0.212	0.428	0.000168497
MYH9	1.31954e-08	0.235866	0.988	0.943	0.000168584
CRLS1	1.32043e-08	-0.127223	0.056	0.203	0.000168699
SNRPN	1.32251e-08	-0.128749	0.021	0.136	0.000168963
PPID	1.35748e-08	-0.152159	0.1	0.27	0.000173431
JAGN1	1.37567e-08	-0.123507	0.065	0.22	0.000175756
PLD3	1.3784e-08	-0.188133	0.145	0.327	0.000176105
CALU	1.39391e-08	-0.203723	0.206	0.411	0.000178086
PQLC1	1.39515e-08	-0.189909	0.206	0.421	0.000178244
APP	1.39668e-08	-0.137392	0.186	0.401	0.00017844
TIMMDC1	1.40677e-08	-0.151123	0.189	0.403	0.000179729
FFAR2	1.41067e-08	-0.315167	0.224	0.428	0.000180228
ZFAND6	1.42203e-08	-0.159883	0.242	0.475	0.000181678
ARMCX3	1.45319e-08	-0.135082	0.097	0.272	0.00018566
DPM3	1.45555e-08	-0.148154	0.103	0.277	0.000185961
DCAF13	1.49526e-08	-0.14353	0.074	0.228	0.000191034
RCBTB2	1.50544e-08	-0.181021	0.162	0.354	0.000192334
MFN2	1.52968e-08	-0.138718	0.23	0.47	0.000195431
MARK3	1.53354e-08	-0.180725	0.327	0.592	0.000195925
ZDHHC18	1.54924e-08	-0.141595	0.086	0.248	0.000197931
DFFA	1.5521e-08	-0.130483	0.124	0.312	0.000198297
DNASE2	1.59115e-08	-0.26471	0.404	0.601	0.000203286
MRPL37	1.59863e-08	-0.14351	0.106	0.277	0.000204241
ABHD3	1.60502e-08	-0.135257	0.091	0.26	0.000205058
DUS1L	1.63684e-08	-0.154468	0.18	0.389	0.000209123
DGKA	1.63773e-08	-0.117075	0.115	0.3	0.000209237
FBXL15	1.66639e-08	-0.137135	0.142	0.334	0.000212898
FAM118B	1.66982e-08	-0.123781	0.059	0.205	0.000213336
MAP2K4	1.68964e-08	-0.119207	0.041	0.176	0.000215869
PTGS1	1.70446e-08	-0.178114	0.077	0.235	0.000217762
PSMD3	1.722e-08	-0.14938	0.198	0.408	0.000220003
MRPS21	1.72877e-08	-0.157332	0.233	0.463	0.000220868
MRPS7	1.73024e-08	-0.13141	0.133	0.319	0.000221055
SERP1	1.73053e-08	-0.187015	0.861	0.921	0.000221092
NTMT1	1.73932e-08	-0.123246	0.083	0.248	0.000222215
PGRMC1	1.75278e-08	-0.139666	0.139	0.324	0.000223935
RASSF5	1.76119e-08	0.241276	0.95	0.804	0.000225009
CHMP2A	1.76233e-08	-0.229058	0.555	0.73	0.000225155
PELI1	1.76407e-08	-0.186227	0.221	0.443	0.000225378
VHL	1.76668e-08	-0.159702	0.165	0.361	0.000225711
PPP1R7	1.78642e-08	-0.137054	0.28	0.54	0.000228233
AGPAT1	1.78739e-08	-0.111557	0.027	0.149	0.000228357
PSMB2	1.79373e-08	-0.16672	0.245	0.473	0.000229167
ARPC4	1.79815e-08	-0.21297	0.729	0.834	0.000229732
PDE4D	1.79992e-08	-0.135455	0.047	0.186	0.000229958
ANKIB1	1.81858e-08	-0.162911	0.209	0.423	0.000232342
CDC123	1.84108e-08	-0.14366	0.189	0.399	0.000235216
RXRB	1.85278e-08	-0.124389	0.059	0.205	0.000236711
FXYD5	1.86838e-08	-0.164158	0.215	0.433	0.000238705
UPF1	1.88476e-08	-0.151951	0.204	0.421	0.000240797
ARFRP1	1.9046e-08	-0.145441	0.086	0.245	0.000243332
FAM21C	1.91139e-08	0.293648	0.33	0.178	0.000244199
NDUFS1	1.91885e-08	-0.159204	0.218	0.441	0.000245152
PFDN2	1.93797e-08	-0.150637	0.198	0.413	0.000247595
ROMO1	1.94053e-08	-0.15138	0.201	0.418	0.000247923
ZBTB43	1.95991e-08	-0.197633	0.139	0.322	0.000250398
INPP5K	1.96566e-08	-0.16244	0.145	0.332	0.000251133
PLBD1	1.97386e-08	-0.344764	0.802	0.827	0.00025218
DDX41	1.98848e-08	-0.133321	0.15	0.347	0.000254048
ZFAND2A	2.0051e-08	-0.145391	0.088	0.252	0.000256172
HLA-DQA1	2.00779e-08	-0.243613	0.1	0.265	0.000256515
HNRNPLL	2.04015e-08	-0.121996	0.041	0.173	0.00026065
ACBD3	2.04206e-08	-0.139079	0.192	0.406	0.000260894
MRPL34	2.05057e-08	-0.134086	0.136	0.324	0.00026198
RELT	2.0616e-08	-0.201435	0.378	0.629	0.00026339
RMDN1	2.07383e-08	-0.156392	0.127	0.304	0.000264952
BRAP	2.07654e-08	-0.146598	0.124	0.309	0.000265299
SIK1	2.08121e-08	-0.199012	0.212	0.423	0.000265896
C12orf10	2.14119e-08	-0.11646	0.035	0.163	0.000273558
ZNF644	2.15027e-08	-0.140727	0.162	0.364	0.000274719
DIP2B	2.15832e-08	-0.164911	0.147	0.334	0.000275747
TWF2	2.16208e-08	-0.166837	0.174	0.371	0.000276227
FDFT1	2.19234e-08	-0.186332	0.145	0.327	0.000280093
NOMO3	2.21565e-08	0.122705	0.106	0.012	0.000283071
ITPKC	2.21976e-08	-0.113687	0.027	0.146	0.000283596
PGPEP1	2.26644e-08	-0.151107	0.115	0.29	0.00028956
TPRA1	2.27158e-08	-0.13142	0.05	0.188	0.000290217
C11orf48	2.28628e-08	-0.152089	0.136	0.317	0.000292096
MFSD7	2.29414e-08	-0.10307	0.027	0.149	0.000293099
WDR6	2.30148e-08	-0.132228	0.071	0.223	0.000294037
KRT7	2.31598e-08	-0.259737	0.021	0.134	0.000295889
STX5	2.32669e-08	-0.141402	0.106	0.277	0.000297258
POLK	2.3566e-08	-0.147004	0.106	0.275	0.000301079
CDYL	2.35931e-08	-0.148901	0.124	0.302	0.000301425
MDH1	2.36361e-08	-0.143458	0.183	0.391	0.000301975
MED10	2.39136e-08	-0.142003	0.192	0.403	0.00030552
DSTN	2.39376e-08	-0.151269	0.192	0.401	0.000305827
UTP23	2.41023e-08	-0.168492	0.124	0.302	0.000307931
ATF6	2.45459e-08	-0.162119	0.304	0.569	0.000313599
TESK1	2.47219e-08	-0.122161	0.032	0.156	0.000315847
ARL2BP	2.48489e-08	-0.150951	0.127	0.312	0.000317469
TNFAIP6	2.51786e-08	-0.127241	0.021	0.134	0.000321682
NOP10	2.52832e-08	-0.152701	0.271	0.51	0.000323018
WDR13	2.54448e-08	-0.164494	0.156	0.349	0.000325083
PLAUR	2.59958e-08	-0.273475	0.552	0.72	0.000332123
EIF4G3	2.64673e-08	-0.21103	0.215	0.418	0.000338146
SNHG1	2.65414e-08	-0.135082	0.091	0.255	0.000339093
NUCB1	2.65424e-08	-0.221759	0.676	0.804	0.000339106
TIMM17B	2.66094e-08	-0.141466	0.13	0.312	0.000339961
OS9	2.66858e-08	-0.182327	0.823	0.884	0.000340938
PSME1	2.67069e-08	-0.177033	0.956	0.975	0.000341207
CCDC86	2.67302e-08	-0.132484	0.035	0.161	0.000341505
DDT	2.67355e-08	-0.109706	0.094	0.262	0.000341573
MEA1	2.68309e-08	-0.155825	0.18	0.381	0.000342791
MFSD10	2.70124e-08	-0.122218	0.077	0.233	0.000345111
OSER1	2.73885e-08	-0.1754	0.198	0.401	0.000349916
VPS25	2.76283e-08	-0.147529	0.136	0.319	0.000352979
CPSF2	2.77825e-08	-0.154517	0.245	0.478	0.000354949
IFT20	2.79283e-08	-0.108998	0.074	0.23	0.000356812
ROGDI	2.83623e-08	-0.161057	0.103	0.267	0.000362356
TMCO1	2.84774e-08	-0.132552	0.242	0.49	0.000363827
NFKBIA	2.8503e-08	-0.270306	0.962	0.97	0.000364154
DNMBP	2.8837e-08	-0.115695	0.047	0.183	0.000368421
SRP54	2.88837e-08	-0.158271	0.212	0.431	0.000369018
PTRH1	2.90117e-08	-0.104241	0.009	0.109	0.000370654
EIF2S1	2.9108e-08	-0.170458	0.26	0.49	0.000371883
COMMD10	2.95275e-08	-0.106101	0.047	0.186	0.000377243
ALG5	2.96965e-08	-0.128454	0.091	0.255	0.000379402
PCID2	3.00447e-08	-0.153767	0.13	0.312	0.000383852
CD55	3.05714e-08	-0.308241	0.726	0.782	0.00039058
BUB3	3.0808e-08	-0.14938	0.198	0.406	0.000393603
ECI1	3.08347e-08	-0.149144	0.097	0.26	0.000393944
KIFC3	3.09017e-08	-0.113724	0.012	0.114	0.0003948
TMEM168	3.09143e-08	-0.10283	0.015	0.121	0.000394961
MMD	3.11075e-08	-0.12151	0.021	0.134	0.00039743
TMEM9B	3.13557e-08	-0.149551	0.242	0.47	0.0004006
TRAPPC6B	3.15564e-08	-0.126023	0.047	0.181	0.000403165
SPAG9	3.17528e-08	-0.188722	0.245	0.468	0.000405674
TMED8	3.17824e-08	-0.150406	0.142	0.327	0.000406052
YIPF3	3.1803e-08	-0.141046	0.145	0.334	0.000406315
SH3GL1	3.20181e-08	-0.123078	0.059	0.203	0.000409063
VPS26A	3.20862e-08	-0.157824	0.298	0.552	0.000409933
SLC39A7	3.21802e-08	-0.153278	0.177	0.376	0.000411135
CYB5R4	3.23453e-08	-0.139275	0.26	0.498	0.000413244
IAH1	3.28303e-08	-0.122218	0.071	0.223	0.000419439
IGHG2	3.28666e-08	-0.140705	0.077	0.233	0.000419904
ITPRIPL2	3.32678e-08	-0.161782	0.109	0.277	0.000425029
FAM101B	3.37711e-08	-0.168391	0.23	0.453	0.00043146
CSNK2B	3.43022e-08	-0.135047	0.189	0.396	0.000438245
UNC45A	3.45025e-08	-0.136899	0.112	0.287	0.000440804
PCED1B-AS1	3.49743e-08	-0.109516	0.047	0.183	0.000446831
LZTR1	3.50937e-08	-0.129559	0.094	0.26	0.000448357
TMEM176B	3.50977e-08	-0.287648	0.558	0.715	0.000448409
MED4	3.58233e-08	-0.140882	0.147	0.337	0.000457679
CLEC4A	3.61148e-08	-0.140638	0.145	0.337	0.000461402
NABP1	3.61277e-08	-0.195917	0.165	0.356	0.000461568
SLC7A6OS	3.62006e-08	-0.143039	0.059	0.2	0.000462498
DDX3X	3.62685e-08	-0.180201	0.914	0.923	0.000463367
ACTR1A	3.64801e-08	-0.149226	0.271	0.515	0.000466069
ZFC3H1	3.6695e-08	-0.168655	0.233	0.458	0.000468815
NUDT18	3.67837e-08	-0.119207	0.047	0.181	0.000469949
ITGAM	3.72162e-08	-0.27242	0.729	0.79	0.000475474
KRAS	3.72385e-08	-0.1809	0.324	0.572	0.000475759
ADSL	3.73671e-08	-0.128581	0.204	0.426	0.000477402
TCERG1	3.76857e-08	-0.153358	0.186	0.386	0.000481472
CSF2RA	3.83382e-08	-0.171332	0.153	0.339	0.000489809
IL27RA	3.84042e-08	-0.162007	0.189	0.386	0.000490652
ZNF432	3.85028e-08	-0.101242	0.009	0.106	0.000491912
BTG2	3.89534e-08	-0.221115	0.431	0.668	0.000497669
ZNF276	3.90838e-08	-0.12815	0.115	0.29	0.000499335
MRPS11	3.91075e-08	-0.131518	0.068	0.215	0.000499638
MVD	3.94139e-08	-0.13142	0.05	0.186	0.000503552
ENSA	3.97967e-08	-0.224703	0.681	0.79	0.000508442
SGPL1	3.99274e-08	-0.176806	0.209	0.416	0.000510112
TMEM251	4.01494e-08	-0.104241	0.015	0.119	0.000512949
SSBP4	4.02966e-08	-0.137895	0.186	0.394	0.000514829
GFRA2	4.04642e-08	-0.217699	0.027	0.141	0.00051697
DCUN1D5	4.057e-08	-0.117933	0.032	0.153	0.000518322
EIF2D	4.07141e-08	-0.111575	0.044	0.176	0.000520163
R3HDM4	4.08688e-08	-0.13412	0.174	0.379	0.00052214
NOSIP	4.10896e-08	-0.153089	0.183	0.379	0.000524961
SNCA	4.15834e-08	-0.120851	0.024	0.136	0.000531269
ITPA	4.16884e-08	-0.167837	0.162	0.351	0.000532611
POLR3H	4.24082e-08	-0.139593	0.065	0.21	0.000541807
C16orf72	4.24178e-08	-0.156003	0.177	0.371	0.00054193
SLMAP	4.24294e-08	-0.142234	0.183	0.389	0.000542078
RHBDD2	4.27376e-08	-0.115096	0.035	0.158	0.000546016
ZFAND2B	4.27789e-08	-0.162392	0.174	0.366	0.000546544
PDCD4	4.32403e-08	-0.171108	0.26	0.483	0.000552438
ARL11	4.32967e-08	-0.140923	0.1	0.262	0.000553159
RNF149	4.38523e-08	-0.21017	0.858	0.896	0.000560257
ILF2	4.41626e-08	-0.15541	0.242	0.47	0.000564221
PITPNM1	4.42478e-08	-0.144812	0.212	0.433	0.00056531
ZFP91	4.44022e-08	-0.15496	0.23	0.46	0.000567283
RBM8A	4.46119e-08	-0.141548	0.248	0.478	0.000569962
DESI1	4.47938e-08	-0.148901	0.142	0.322	0.000572285
SEC61G	4.49329e-08	-0.105488	0.124	0.304	0.000574063
RNF185	4.50433e-08	-0.126254	0.038	0.163	0.000575473
RIOK1	4.50434e-08	-0.137758	0.1	0.267	0.000575475
DGAT1	4.51114e-08	-0.124878	0.106	0.277	0.000576344
PSMB10	4.54121e-08	-0.132942	0.071	0.218	0.000580185
SLC25A3	4.55005e-08	-0.161963	0.971	0.96	0.000581315
ISCA2	4.55811e-08	-0.135092	0.086	0.24	0.000582344
SLC1A3	4.59472e-08	-0.147948	0.027	0.141	0.000587021
PDIA4	4.68625e-08	-0.191972	0.201	0.401	0.000598716
RAB21	4.68712e-08	-0.173119	0.292	0.53	0.000598827
SBNO2	4.76266e-08	-0.131638	0.127	0.312	0.000608478
LCP2	4.82952e-08	0.321905	0.699	0.619	0.00061702
PSMF1	4.94972e-08	-0.134893	0.198	0.403	0.000632376
RHOB	4.99399e-08	0.240655	0.755	0.584	0.000638032
DDX42	5.02065e-08	-0.18801	0.265	0.485	0.000641438
NHP2L1	5.02412e-08	-0.163662	0.28	0.512	0.000641882
SRSF1	5.13791e-08	-0.136903	0.171	0.369	0.00065642
ISY1	5.15157e-08	-0.135915	0.124	0.297	0.000658165
TOMM20	5.26752e-08	-0.137006	0.283	0.537	0.000672978
SPTSSA	5.30081e-08	-0.128604	0.159	0.349	0.000677232
ETFA	5.33255e-08	-0.140176	0.239	0.46	0.000681287
KLHL24	5.34828e-08	-0.131499	0.115	0.292	0.000683296
MGST2	5.36029e-08	-0.109667	0.091	0.252	0.00068483
MAGOH	5.42965e-08	-0.142809	0.118	0.287	0.000693692
C1orf123	5.48894e-08	-0.128329	0.091	0.252	0.000701267
TXN2	5.49067e-08	-0.142645	0.206	0.416	0.000701488
OSBPL2	5.49535e-08	-0.132838	0.15	0.344	0.000702086
TMEM167A	5.49996e-08	-0.187115	0.398	0.636	0.000702674
SENP5	5.51329e-08	-0.153295	0.097	0.255	0.000704378
TMTC1	5.56392e-08	-0.135984	0.068	0.213	0.000710846
VPS4B	5.57308e-08	-0.130157	0.319	0.579	0.000712017
RBX1	5.59082e-08	-0.115937	0.224	0.453	0.000714284
ACADVL	5.59463e-08	-0.237467	0.729	0.8	0.00071477
DYSF	5.61246e-08	-0.140438	0.142	0.322	0.000717047
RSAD2	5.64206e-08	0.395726	0.265	0.124	0.000720829
COX5A	5.67205e-08	-0.164877	0.342	0.609	0.000724661
LRCH4	5.6868e-08	-0.153089	0.18	0.374	0.000726546
ADCY3	5.79956e-08	-0.123729	0.021	0.129	0.000740952
GPR108	5.81779e-08	-0.13474	0.097	0.257	0.000743281
NELFE	5.83876e-08	-0.142149	0.263	0.507	0.00074596
SND1	5.87039e-08	-0.160022	0.313	0.569	0.000750001
RELB	5.89271e-08	-0.12871	0.08	0.233	0.000752853
SPATA13	5.92912e-08	-0.166661	0.233	0.455	0.000757504
MBP	5.93132e-08	-0.174956	0.319	0.554	0.000757786
PYGB	5.93132e-08	-0.133391	0.174	0.381	0.000757786
DCAF12	5.98666e-08	-0.15769	0.162	0.351	0.000764856
FAM198B	6.01497e-08	-0.151798	0.168	0.361	0.000768472
NAGLU	6.04167e-08	-0.119038	0.056	0.196	0.000771883
MPDU1	6.14079e-08	-0.113967	0.168	0.369	0.000784547
PAPSS1	6.16147e-08	-0.137009	0.251	0.485	0.000787189
ARFGAP3	6.16438e-08	-0.122805	0.204	0.423	0.000787561
NAP1L4	6.19811e-08	-0.153742	0.23	0.46	0.00079187
HMGN2	6.21491e-08	0.302484	0.378	0.238	0.000794017
TIMM23	6.2158e-08	-0.12157	0.168	0.361	0.00079413
SLC39A11	6.2389e-08	-0.146924	0.118	0.29	0.000797081
HCCS	6.24562e-08	-0.116136	0.088	0.248	0.00079794
CTSH	6.29786e-08	-0.191535	0.676	0.812	0.000804614
DNMT3A	6.31765e-08	-0.168357	0.109	0.267	0.000807143
VDAC1	6.35752e-08	-0.162853	0.245	0.468	0.000812236
APBB3	6.43036e-08	-0.121996	0.05	0.181	0.000821543
ITPRIP	6.45437e-08	-0.150008	0.177	0.374	0.000824611
PISD	6.47196e-08	-0.145869	0.156	0.344	0.000826858
PCBD1	6.47371e-08	-0.124899	0.035	0.156	0.000827081
ZDHHC4	6.55044e-08	-0.108161	0.05	0.186	0.000836884
C2orf88	6.55147e-08	-0.115905	0.009	0.104	0.000837016
SNRPD2	6.56143e-08	-0.196101	0.625	0.782	0.000838288
MKNK1	6.63926e-08	-0.153458	0.174	0.371	0.000848232
CGGBP1	6.70339e-08	-0.169929	0.263	0.498	0.000856426
FLT3	6.72129e-08	-0.123078	0.015	0.116	0.000858712
AP2M1	6.7648e-08	-0.206055	0.611	0.78	0.000864271
VPS28	6.77991e-08	-0.141135	0.239	0.468	0.000866202
MLX	6.82697e-08	-0.149135	0.198	0.401	0.000872214
C16orf13	6.86436e-08	-0.138953	0.097	0.252	0.000876991
SH3PXD2B	6.86886e-08	-0.140438	0.029	0.144	0.000877566
LYAR	6.89447e-08	-0.130326	0.177	0.381	0.000880837
CTSS	6.89741e-08	-0.172202	1	1	0.000881213
ACTN1	6.91511e-08	-0.164299	0.171	0.361	0.000883475
RING1	6.97917e-08	-0.118969	0.133	0.314	0.000891659
MRPS26	7.00464e-08	-0.127565	0.077	0.225	0.000894913
TYW1	7.03929e-08	-0.10074	0.021	0.129	0.00089934
OPN3	7.06787e-08	-0.112936	0.071	0.218	0.000902991
PTRH2	7.07984e-08	-0.136894	0.077	0.223	0.000904521
COX15	7.11463e-08	-0.14212	0.109	0.272	0.000908966
PAF1	7.18708e-08	-0.174108	0.183	0.374	0.000918222
SCCPDH	7.20846e-08	-0.161057	0.083	0.23	0.000920953
ACADM	7.22448e-08	-0.127444	0.077	0.225	0.000923
PPARG	7.36966e-08	-0.112267	0.018	0.121	0.000941547
RECQL	7.38371e-08	-0.153171	0.254	0.47	0.000943342
AUP1	7.52148e-08	-0.125763	0.316	0.592	0.000960945
PWP1	7.60603e-08	-0.145542	0.124	0.295	0.000971747
CDC37	7.63246e-08	-0.170782	0.437	0.678	0.000975123
GNA13	7.64955e-08	-0.150543	0.289	0.532	0.000977306
FBXO33	7.69046e-08	-0.105083	0.165	0.371	0.000982533
ZC3H12A	7.76597e-08	-0.124989	0.053	0.188	0.000992181
TMED7	7.80349e-08	-0.128557	0.142	0.327	0.000996974
ERAP1	7.85192e-08	-0.206169	0.215	0.413	0.00100316
SDCBP	7.87118e-08	-0.196799	0.867	0.899	0.00100562
TRA2B	7.8732e-08	-0.207069	0.832	0.886	0.00100588
STK11	7.87515e-08	-0.12122	0.145	0.329	0.00100613
KIAA1429	7.93402e-08	-0.143904	0.159	0.347	0.00101365
SLC15A4	7.93653e-08	-0.160716	0.168	0.351	0.00101397
TMEM165	7.95043e-08	-0.129181	0.224	0.438	0.00101575
PLIN2	8.10079e-08	-0.362291	0.493	0.658	0.00103496
DNAJB11	8.18415e-08	-0.163636	0.26	0.488	0.00104561
FUBP1	8.21119e-08	-0.181659	0.28	0.495	0.00104906
USP14	8.2137e-08	-0.147607	0.145	0.324	0.00104938
EPC1	8.24189e-08	-0.143722	0.298	0.542	0.00105298
RB1CC1	8.25879e-08	-0.183996	0.289	0.51	0.00105514
[truncated: 5,580 more rows]

## Sheet: B_Cell_COVID
Differentially expressed genes in B cells for survival vs. non-survival COVID ICU patients
[truncated: 5,390 more rows]

[truncated: 11 more sheets: NK_COVID, DC_COVID, MAIT_COVID, CD4_Flu, CD8_Flu, CD14_Flu, CD16_Flu, B_Cell_Flu, NK_Flu, DC_Flu, MAIT_Flu]
